# Supplementary material for: Spermatozoa protein alterations in infertile men with bilateral varicocele
Source: PubMed Central journal article supplement — Asian J Androl. 2015 May 22;18(1):43–53. doi: 10.4103/1008-682X.153848 (PMC4736356; doi:10.4103/1008-682x.153848), 2015-05-22
Supplement: AJA-18-43_Suppl1.pdf [file AJA-18-43_Suppl1.pdf]

**Supplementary Table 1: Overall semen parameters in fertile and infertile men with bilateral varicocele and those selected for proteomic analysis**

| <i>Parameter</i>                                        | <i>Fertile men (n=10)</i> | <i>Bilateral varicocele (n=17)</i> | <i>P value</i> |
|---------------------------------------------------------|---------------------------|------------------------------------|----------------|
| Samples selected for varicocele analysis                |                           |                                    |                |
| Age (y)                                                 | 39.75±8.53                | 32.00±5.72                         | 0.025          |
| Concentration (10 <sup>6</sup> mL <sup>-1</sup> )       | 52.70±41.52               | 35.51±44.86                        | 0.15           |
| Motility (%)                                            | 51.67±11.04               | 41.76±19.78                        | 0.32           |
| Round cell (10 <sup>6</sup> mL <sup>-1</sup> )          | 0.85±0.69                 | 2.32±2.50                          | 0.12           |
| Leukocytospermia (10 <sup>6</sup> mL <sup>-1</sup> )    | 0.00±0.00                 | 0.24±0.45                          | 0.30           |
| Morphology (%)                                          | 8.00±4.10                 | 2.25±2.27                          | 0.002          |
| ROS (RLU sec <sup>-1</sup> million <sup>-1</sup> sperm) | 58.9 (12, 110)            | 894.9 (149.2, 2842)                | 0.007          |
| TAC levels (Micromoles Trolox)                          | 2051.57±441.63            | 1988.85±553.35                     | 0.78           |
| DNA Fragmentation (%)                                   | 14.4±3.9                  | 16.4 ± 10.1                        | 1.0            |
| Range (%)                                               | (8.5–18.2)                | (7.0–48.3)                         |                |
|                                                         | <i>Fertile men (n=5)</i>  | <i>Bilateral varicocele (n=3)</i>  |                |
| Samples selected for proteomic analysis                 |                           |                                    |                |
| Age (y)                                                 | 34.40±4.63                | 31.70±6.7                          | 0.72           |
| Concentration (10 <sup>6</sup> mL <sup>-1</sup> )       | 80.60±29.60               | 71.90±44.80                        | 0.78           |
| Motility (%)                                            | 53.80±3.76                | 44.30±30.70                        | 0.64           |
| Round cell (10 <sup>6</sup> mL <sup>-1</sup> )          | 0.75±0.61                 | 0.80±0.20                          | 0.85           |
| Leukocytospermia (10 <sup>6</sup> mL <sup>-1</sup> )    | 0.00±0.00                 | 0.00±0.00                          | NA             |
| Morphology (%)                                          | 8.4±3.88                  | 5.00±2.00                          | 0.18           |
| ROS (RLU sec <sup>-1</sup> million <sup>-1</sup> sperm) | 57.05 (13.4, 82.3)        | 250.1 (138.4, 2915.2)              | 0.18           |
| TAC levels (Micromoles Trolox)                          | 2229.25±378.12            | 2230.00±848.50                     | 0.82           |
| DNA Fragmentation (%)                                   | 19.0±4.7                  | 24.9±20.7                          | 0.67           |
| Range (%)                                               | (13.6–26.4)               | (8.9.0–48.3)                       |                |

*P*<0.05 considered significant by Kruskal-Wallis test
