# Supplementary material for: Spermatozoa protein alterations in infertile men with bilateral varicocele
Source: PubMed Central journal article supplement — Asian J Androl. 2015 May 22;18(1):43–53. doi: 10.4103/1008-682X.153848 (PMC4736356; doi:10.4103/1008-682x.153848), 2015-05-22
Supplement: AJA-18-43_Suppl2.pdf [file AJA-18-43_Suppl2.pdf]

**Supplementary Table 2: Global proteomic profiling of fertile control group in triplicate – First run**

| No. | Protein                                             | Accession number | Mass (kDa) | Peptides number | Sequence coverage (%) | Spectral counts |
|-----|-----------------------------------------------------|------------------|------------|-----------------|-----------------------|-----------------|
| 1   | semenogelin-2 precursor                             | 4506885          | 65         | 62              | 62                    | 1803            |
| 2   | semenogelin-1 preproprotein                         | 4506883          | 52         | 72              | 71                    | 1588            |
| 3   | lactotransferrin isoform 1 precursor                | 54607120         | 78         | 74              | 76                    | 1308            |
| 4   | A-kinase anchor protein 4 isoform 2                 | 21493039         | 93         | 71              | 72                    | 1069            |
| 5   | tubulin beta-4B chain                               | 5174735          | 50         | 39              | 74                    | 922             |
| 6   | fibronectin isoform 3 preproprotein                 | 16933542         | 259        | 112             | 48                    | 875             |
| 7   | heat shock-related 70 protein 2                     | 13676857         | 70         | 48              | 72                    | 727             |
| 8   | tubulin alpha-3C/D chain                            | 17921993         | 50         | 34              | 75                    | 638             |
| 9   | heat shock protein HSP 90-alpha isoform 1           | 153792590        | 98         | 59              | 53                    | 612             |
| 10  | A-kinase anchor protein 3                           | 21493041         | 95         | 58              | 56                    | 567             |
| 11  | actin, cytoplasmic 1                                | 4501885          | 42         | 34              | 85                    | 564             |
| 12  | 78 glucose-regulated protein precursor              | 16507237         | 72         | 38              | 55                    | 544             |
| 13  | prolactin-inducible protein precursor               | 4505821          | 17         | 17              | 77                    | 540             |
| 14  | clusterin preproprotein                             | 355594753        | 52         | 28              | 43                    | 515             |
| 15  | keratin, type II cytoskeletal 1                     | 119395750        | 66         | 44              | 53                    | 494             |
| 16  | endoplasmic precursor                               | 4507677          | 92         | 55              | 55                    | 473             |
| 17  | heat shock cognate 71 protein isoform 1             | 5729877          | 71         | 18              | 43                    | 447             |
| 18  | keratin, type I cytoskeletal 9                      | 55956899         | 62         | 41              | 62                    | 446             |
| 19  | pyruvate kinase isozymes M1/M2 isoform c            | 332164775        | 66         | 42              | 64                    | 412             |
| 20  | ATP synthase subunit beta, mitochondrial precursor  | 32189394         | 57         | 30              | 74                    | 389             |
| 21  | heat shock protein HSP 90-beta                      | 20149594         | 83         | 23              | 47                    | 385             |
| 22  | prostatic acid phosphatase isoform TM-PAP precursor | 197116348        | 48         | 22              | 44                    | 366             |
| 23  | heat shock 70 protein 1-like                        | 124256496        | 70         | 28              | 59                    | 350             |
| 24  | protein disulfide-isomerase A3 precursor            | 21361657         | 57         | 36              | 65                    | 340             |
| 25  | tubulin alpha-1A chain                              | 17986283         | 50         | 5               | 64                    | 340             |
| 26  | alpha-enolase isoform 1                             | 4503571          | 47         | 35              | 77                    | 337             |

*Contd...*

Supplementary Table 2: Contd...

| No. | Protein                                                              | Gel 1            |            |                 |                       |                 |
|-----|----------------------------------------------------------------------|------------------|------------|-----------------|-----------------------|-----------------|
|     |                                                                      | Accession number | Mass (kDa) | Peptides number | Sequence coverage (%) | Spectral counts |
| 27  | heat shock 70 protein 1A/1B                                          | 194248072        | 70         | 17              | 49                    | 326             |
| 28  | tubulin beta-4A chain                                                | 21361322         | 50         | 2               | 61                    | 322             |
| 29  | keratin, type I cytoskeletal 10                                      | 195972866        | 59         | 33              | 44                    | 301             |
| 30  | keratin, type II cytoskeletal 2 epidermal                            | 47132620         | 65         | 30              | 57                    | 276             |
| 31  | fructose-bisphosphate aldolase A isoform 2                           | 342187211        | 45         | 34              | 76                    | 263             |
| 32  | hypoxia up-regulated protein 1 precursor                             | 5453832          | 111        | 48              | 45                    | 258             |
| 33  | outer dense fiber protein 2 isoform 3                                | 310750406        | 81         | 30              | 48                    | 255             |
| 34  | pyruvate kinase isozymes M1/M2 isoform a                             | 33286418         | 58         | 2               | 76                    | 249             |
| 35  | prostate-specific antigen isoform 1 preproprotein                    | 4502173          | 29         | 17              | 84                    | 241             |
| 36  | calcium-binding tyrosine phosphorylation-regulated protein isoform c | 24797112         | 41         | 23              | 59                    | 238             |
| 37  | glyceraldehyde-3-phosphate dehydrogenase, testis- specific           | 7657116          | 45         | 20              | 75                    | 236             |
| 38  | elongation factor 1-alpha 1                                          | 4503471          | 50         | 26              | 54                    | 231             |
| 39  | calcium-binding tyrosine phosphorylation-regulated protein isoform a | 24797108         | 53         | 6               | 43                    | 229             |
| 40  | tubulin beta chain                                                   | 29788785         | 50         | 2               | 61                    | 229             |
| 41  | tubulin beta-6 chain                                                 | 14210536         | 50         | 3               | 19                    | 228             |
| 42  | aminopeptidase N precursor                                           | 157266300        | 110        | 50              | 41                    | 226             |
| 43  | keratin, type I cytoskeletal 13 isoform a                            | 131412225        | 50         | 28              | 59                    | 226             |
| 44  | ropporin-1A                                                          | 21359920         | 24         | 13              | 69                    | 220             |
| 45  | plastin-2                                                            | 167614506        | 70         | 41              | 78                    | 220             |
| 46  | myosin-9                                                             | 12667788         | 227        | 68              | 38                    | 216             |
| 47  | triosephosphate isomerase isoform 2                                  | 226529917        | 31         | 24              | 94                    | 214             |
| 48  | ruvB-like 2                                                          | 5730023          | 51         | 35              | 76                    | 212             |
| 49  | tubulin beta-3 chain isoform 1                                       | 50592996         | 50         | 2               | 32                    | 204             |
| 50  | leucine-rich repeat-containing protein 37B precursor                 | 53829385         | 106        | 28              | 29                    | 203             |
| 51  | ATP synthase subunit alpha, mitochondrial precursor                  | 4757810          | 60         | 31              | 58                    | 202             |
| 52  | tubulin alpha-1C chain                                               | 14389309         | 50         | 2               | 61                    | 200             |
| 53  | 60 heat shock protein, mitochondrial                                 | 31542947         | 61         | 37              | 76                    | 190             |
| 54  | transitional endoplasmic reticulum ATPase                            | 6005942          | 89         | 37              | 51                    | 189             |
| 55  | fatty acid synthase                                                  | 41872631         | 273        | 42              | 16                    | 188             |
| 56  | acetyl-CoA acetyltransferase, mitochondrial precursor                | 4557237          | 45         | 25              | 53                    | 188             |
| 57  | malate dehydrogenase, mitochondrial precursor                        | 21735621         | 36         | 21              | 65                    | 187             |
| 58  | T-complex protein 1 subunit beta isoform 1                           | 5453603          | 57         | 33              | 67                    | 183             |
| 59  | creatine kinase B-type                                               | 21536286         | 43         | 18              | 65                    | 172             |
| 60  | angiotensin-converting enzyme isoform 1 precursor                    | 4503273          | 150        | 27              | 23                    | 171             |
| 61  | keratin, type II cytoskeletal 5                                      | 119395754        | 62         | 19              | 32                    | 171             |
| 62  | keratin, type II cytoskeletal 6A                                     | 5031839          | 60         | 13              | 45                    | 171             |
| 63  | phosphoglycerate kinase 2                                            | 31543397         | 45         | 26              | 75                    | 163             |
| 64  | annexin A5                                                           | 4502107          | 36         | 24              | 79                    | 163             |
| 65  | glutathione S-transferase Mu 3                                       | 23065552         | 27         | 21              | 77                    | 161             |
| 66  | heat shock protein beta-1                                            | 4504517          | 23         | 18              | 87                    | 160             |
| 67  | fumarate hydratase, mitochondrial                                    | 19743875         | 55         | 22              | 61                    | 159             |
| 68  | ruvB-like 1                                                          | 4506753          | 50         | 27              | 70                    | 159             |
| 69  | acrosin-binding protein precursor                                    | 17999524         | 61         | 23              | 43                    | 158             |
| 70  | hexokinase-1 isoform HK1-ta/tb                                       | 15991831         | 103        | 35              | 37                    | 155             |
| 71  | annexin A1                                                           | 4502101          | 39         | 23              | 64                    | 154             |
| 72  | zona pellucida-binding protein 1 isoform 1 precursor                 | 229577313        | 40         | 18              | 60                    | 154             |
| 73  | annexin A2 isoform 1                                                 | 50845388         | 40         | 25              | 66                    | 153             |
| 74  | clathrin heavy chain 1                                               | 4758012          | 192        | 40              | 25                    | 153             |
| 75  | nuclear pore membrane glycoprotein 210-like isoform 1 precursor      | 117414168        | 211        | 50              | 32                    | 149             |
| 76  | uncharacterized protein C1orf56 precursor                            | 20149646         | 37         | 14              | 53                    | 147             |
| 77  | T-complex protein 1 subunit gamma isoform a                          | 63162572         | 61         | 28              | 69                    | 145             |
| 78  | glyceraldehyde-3-phosphate dehydrogenase                             | 7669492          | 36         | 16              | 66                    | 143             |
| 79  | leucine-rich repeat-containing protein 37A precursor                 | 289547512        | 188        | 23              | 14                    | 143             |
| 80  | neutral alpha-glucosidase AB isoform 2 precursor                     | 38202257         | 107        | 32              | 30                    | 141             |

Contd...

**Supplementary Table 2: Contd...**

| No. | Gel 1                                                                                          |                  |            |                 |                       |                 |
|-----|------------------------------------------------------------------------------------------------|------------------|------------|-----------------|-----------------------|-----------------|
|     | Protein                                                                                        | Accession number | Mass (kDa) | Peptides number | Sequence coverage (%) | Spectral counts |
| 81  | ropporin-1B                                                                                    | 59891409         | 24         | 5               | 85                    | 138             |
| 82  | aconitate hydratase, mitochondrial precursor                                                   | 4501867          | 85         | 25              | 39                    | 137             |
| 83  | cathelicidin antimicrobial peptide preproprotein                                               | 348041314        | 20         | 13              | 51                    | 132             |
| 84  | serum albumin preproprotein                                                                    | 4502027          | 69         | 30              | 51                    | 131             |
| 85  | sperm acrosome membrane-associated protein 1 precursor                                         | 13569934         | 32         | 8               | 33                    | 131             |
| 86  | ras-related protein Rab-2A isoform a                                                           | 4506365          | 24         | 16              | 73                    | 131             |
| 87  | sorbitol dehydrogenase                                                                         | 156627571        | 38         | 17              | 50                    | 125             |
| 88  | cytochrome b-c1 complex subunit 2, mitochondrial precursor                                     | 50592988         | 48         | 21              | 54                    | 124             |
| 89  | radial spoke head protein 6 homolog A                                                          | 13540559         | 81         | 16              | 32                    | 123             |
| 90  | dipeptidyl peptidase 4                                                                         | 18765694         | 88         | 30              | 36                    | 121             |
| 91  | keratin, type II cytoskeletal 4                                                                | 331999954        | 56         | 24              | 51                    | 120             |
| 92  | calreticulin precursor                                                                         | 4757900          | 48         | 21              | 69                    | 119             |
| 93  | 14-3-3 protein epsilon                                                                         | 5803225          | 29         | 20              | 62                    | 118             |
| 94  | long-chain-fatty-acid--CoA ligase 1                                                            | 40807491         | 78         | 24              | 37                    | 118             |
| 95  | succinate dehydrogenase [ubiquinone] flavoprotein subunit, mitochondrial                       | 156416003        | 73         | 26              | 57                    | 117             |
| 96  | peroxiredoxin-6                                                                                | 4758638          | 25         | 15              | 72                    | 115             |
| 97  | trifunctional enzyme subunit beta, mitochondrial precursor                                     | 4504327          | 51         | 26              | 54                    | 112             |
| 98  | L-lactate dehydrogenase C chain                                                                | 4504973          | 36         | 24              | 75                    | 111             |
| 99  | T-complex protein 1 subunit delta                                                              | 38455427         | 58         | 22              | 51                    | 111             |
| 100 | elongation factor 2                                                                            | 4503483          | 95         | 31              | 29                    | 110             |
| 101 | elongation factor 1-gamma                                                                      | 4503481          | 50         | 20              | 51                    | 109             |
| 102 | pyruvate dehydrogenase E1 component subunit beta, mitochondrial isoform 1 precursor            | 156564403        | 39         | 14              | 42                    | 109             |
| 103 | dolichyl-diphosphooligosaccharide--protein glycosyltransferase subunit 1 precursor             | 4506675          | 69         | 24              | 49                    | 109             |
| 104 | phospholipid hydroperoxide glutathione peroxidase, mitochondrial isoform A precursor           | 75709200         | 22         | 14              | 59                    | 107             |
| 105 | sperm protein associated with the nucleus on the X chromosome C                                | 13435137         | 11         | 10              | 82                    | 107             |
| 106 | T-complex protein 1 subunit theta                                                              | 48762932         | 60         | 24              | 52                    | 105             |
| 107 | T-complex protein 1 subunit eta isoform a                                                      | 5453607          | 59         | 23              | 53                    | 105             |
| 108 | cytochrome c oxidase subunit 4 isoform 1, mitochondrial precursor                              | 4502981          | 20         | 17              | 56                    | 104             |
| 109 | cysteine-rich secretory protein 1 isoform 1 precursor                                          | 327315372        | 28         | 14              | 71%                   | 103             |
| 110 | lipoprotein lipase precursor                                                                   | 4557727          | 53         | 16              | 32%                   | 103             |
| 111 | izumo sperm-egg fusion protein 4 isoform 1 precursor                                           | 89903025         | 24         | 9               | 50%                   | 101             |
| 112 | isocitrate dehydrogenase [NADP] cytoplasmic                                                    | 28178825         | 47         | 18              | 42%                   | 101             |
| 113 | saccharopine dehydrogenase-like oxidoreductase                                                 | 55770836         | 47         | 16              | 59%                   | 99              |
| 114 | T-complex protein 1 subunit alpha isoform a sperm protein associated with the nucleus on the X | 22027492         | 12         | 7               | 81%                   | 97              |
| 115 | sperm protein associated with the nucleus on the X chromosome B/F                              | 22027492         | 12         | 7               | 81%                   | 97              |
| 116 | calnexin precursor                                                                             | 10716563         | 68         | 21              | 34%                   | 94              |
| 117 | trifunctional enzyme subunit alpha, mitochondrial precursor                                    | 20127408         | 83         | 24              | 36%                   | 94              |
| 118 | sperm equatorial segment protein 1 precursor                                                   | 21717832         | 39         | 13              | 33%                   | 94              |
| 119 | NADH-ubiquinone oxidoreductase 75 subunit, mitochondrial isoform 1                             | 33519475         | 79         | 26              | 32%                   | 94              |
| 120 | tektin-2                                                                                       | 16507950         | 50         | 24              | 62%                   | 93              |
| 121 | agrin precursor                                                                                | 54873613         | 215        | 37              | 26%                   | 93              |
| 122 | annexin A6 isoform 1                                                                           | 71773329         | 76         | 24              | 39%                   | 91              |
| 123 | mitochondrial inner membrane protein isoform 3                                                 | 154354966        | 83         | 26              | 41%                   | 91              |
| 124 | protein disulfide-isomerase precursor                                                          | 20070125         | 57         | 24              | 44%                   | 90              |
| 125 | cytochrome c oxidase subunit 5A, mitochondrial precursor                                       | 190885499        | 17         | 11              | 71%                   | 90              |
| 126 | T-complex protein 1 subunit epsilon                                                            | 24307939         | 60         | 28              | 58%                   | 87              |
| 127 | tektin-3                                                                                       | 13994250         | 57         | 19              | 56%                   | 86              |
| 128 | peroxiredoxin-1                                                                                | 320461711        | 22         | 11              | 58%                   | 86              |
| 129 | cAMP-dependent protein kinase type I-alpha regulatory subunit regulatory subunit               | 4506063          | 43         | 13              | 45%                   | 85              |
| 130 | keratin, type I cytoskeletal 14                                                                | 15431310         | 52         | 9               | 36%                   | 84              |
| 131 | protein FAM166A                                                                                | 48717426         | 36         | 15              | 61%                   | 84              |
| 132 | L-asparaginase                                                                                 | 145275200        | 32         | 13              | 52%                   | 83              |
| 133 | citrate synthase, mitochondrial precursor                                                      | 38327625         | 52         | 21              | 58%                   | 83              |

*Contd...*

Supplementary Table 2: Contd...

| No. | Protein                                                                                                            | Gel 1            |            |                 |                       |                 |
|-----|--------------------------------------------------------------------------------------------------------------------|------------------|------------|-----------------|-----------------------|-----------------|
|     |                                                                                                                    | Accession number | Mass (kDa) | Peptides number | Sequence coverage (%) | Spectral counts |
| 134 | dynein light chain 2, cytoplasmic                                                                                  | 18087855         | 10         | 6               | 70%                   | 83              |
| 135 | dynein light chain 1, cytoplasmic                                                                                  | 4505813          | 10         | 8               | 65%                   | 81              |
| 136 | phosphoglycerate kinase 1                                                                                          | 4505763          | 45         | 12              | 52%                   | 80              |
| 137 | valyl-tRNA synthetase                                                                                              | 5454158          | 140        | 26              | 24%                   | 79              |
| 138 | 6-phosphofructokinase type C isoform 1                                                                             | 11321601         | 86         | 25              | 34%                   | 79              |
| 139 | protein disulfide-isomerase A4 precursor                                                                           | 4758304          | 73         | 23              | 38%                   | 79              |
| 140 | histone H2B type 1-A                                                                                               | 24586679         | 14         | 7               | 37%                   | 78              |
| 141 | cytosol aminopeptidase                                                                                             | 41393561         | 56         | 22              | 61%                   | 77              |
| 142 | dihydropyridyllysine-residue acetyltransferase component of pyruvate dehydrogenase complex mitochondrial precursor | 31711992         | 69         | 16              | 30%                   | 77              |
| 143 | histone H4                                                                                                         | 4504303          | 11         | 12              | 65%                   | 77              |
| 144 | radial spoke head 1 homolog                                                                                        | 18254456         | 35         | 14              | 55                    | 77              |
| 145 | erlin-2 isoform 1                                                                                                  | 6005721          | 38         | 19              | 58                    | 76              |
| 146 | dihydropyridyl dehydrogenase, mitochondrial precursor                                                              | 91199540         | 54         | 21              | 56                    | 75              |
| 147 | cytosolic non-specific dipeptidase isoform 1                                                                       | 271398239        | 53         | 20              | 49                    | 75              |
| 148 | laminin subunit beta-2 precursor                                                                                   | 119703755        | 196        | 24              | 17                    | 74              |
| 149 | 14-3-3 protein zeta/delta                                                                                          | 4507953          | 28         | 13              | 59                    | 73              |
| 150 | ubiquitin-40S ribosomal protein S27a precursor                                                                     | 208022622        | 18         | 4               | 30                    | 72              |
| 151 | vesicular integral-membrane protein VIP36 precursor                                                                | 5803023          | 40         | 15              | 54                    | 72              |
| 152 | 2,4-dienoyl-CoA reductase, mitochondrial precursor                                                                 | 4503301          | 36         | 15              | 59                    | 72              |
| 153 | sperm surface protein Sp17                                                                                         | 8394343          | 17         | 11              | 79                    | 72              |
| 154 | cAMP-dependent protein kinase type II-alpha regulatory subunit                                                     | 4758958          | 46         | 16              | 52                    | 72              |
| 155 | ezrin                                                                                                              | 21614499         | 69         | 18              | 29                    | 71              |
| 156 | carnitine O-palmitoyltransferase 2, mitochondrial precursor                                                        | 4503023          | 74         | 28              | 52                    | 71              |
| 157 | importin subunit beta-1                                                                                            | 19923142         | 97         | 19              | 21                    | 70              |
| 158 | serum amyloid P-component precursor                                                                                | 4502133          | 25         | 9               | 34                    | 69              |
| 159 | gastricsin isoform 1 preproprotein                                                                                 | 4505757          | 42         | 5               | 12                    | 69              |
| 160 | annexin A3                                                                                                         | 4826643          | 36         | 13              | 28                    | 67              |
| 161 | radial spoke head protein 9 homolog isoform 1                                                                      | 32964825         | 31         | 19              | 79                    | 67              |
| 162 | peptidyl-prolyl cis-trans isomerase A                                                                              | 10863927         | 18         | 12              | 66                    | 64              |
| 163 | peroxiredoxin-5, mitochondrial isoform a precursor                                                                 | 6912238          | 22         | 14              | 57                    | 63              |
| 164 | histone H2A type 1-A                                                                                               | 25092737         | 14         | 7               | 35                    | 63              |
| 165 | laminin subunit alpha-5 precursor                                                                                  | 21264602         | 400        | 30              | 11                    | 62              |
| 166 | plasma serine protease inhibitor precursor                                                                         | 194018472        | 46         | 14              | 49                    | 62              |
| 167 | acrosin precursor                                                                                                  | 148613878        | 46         | 15              | 36                    | 62              |
| 168 | dipeptidase 3 isoform a precursor                                                                                  | 193211608        | 56         | 14              | 27                    | 61              |
| 169 | D-3-phosphoglycerate dehydrogenase                                                                                 | 23308577         | 57         | 10              | 20                    | 60              |
| 170 | peroxiredoxin-2 isoform a                                                                                          | 32189392         | 22         | 10              | 54                    | 60              |
| 171 | voltage-dependent anion-selective channel protein 2 isoform 2                                                      | 296317339        | 32         | 11              | 47                    | 60              |
| 172 | T-complex protein 1 subunit zeta-2 isoform 1                                                                       | 58331173         | 58         | 11              | 37                    | 60              |
| 173 | sperm protein associated with the nucleus on the X chromosome E                                                    | 22027496         | 11         | 2               | 80                    | 60              |
| 174 | protein disulfide-isomerase A6 precursor                                                                           | 5031973          | 48         | 14              | 40                    | 59              |
| 175 | peroxiredoxin-4 precursor                                                                                          | 5453549          | 31         | 12              | 56                    | 58              |
| 176 | adipocyte plasma membrane-associated protein                                                                       | 24308201         | 46         | 19              | 54                    | 57              |
| 177 | alpha-actinin-4                                                                                                    | 12025678         | 105        | 22              | 34                    | 57              |
| 178 | cofilin-1                                                                                                          | 5031635          | 19         | 10              | 62                    | 57              |
| 179 | adenylate kinase isoenzyme 1                                                                                       | 4502011          | 22         | 10              | 55                    | 57              |
| 180 | alpha-centractin                                                                                                   | 5031569          | 43         | 13              | 59                    | 56              |
| 181 | myosin light polypeptide 6 isoform 2                                                                               | 88999583         | 17         | 7               | 58                    | 56              |
| 182 | laminin subunit gamma-1 precursor                                                                                  | 145309326        | 178        | 20              | 18                    | 55              |
| 183 | peptidyl-prolyl cis-trans isomerase B precursor                                                                    | 4758950          | 24         | 11              | 52                    | 55              |
| 184 | cytochrome c oxidase subunit II                                                                                    | 251831110        | 26         | 7               | 48                    | 55              |
| 185 | succinyl-CoA: 3-ketoacid-coenzyme A transferase 1, mitochondrial precursor                                         | 4557817          | 56         | 17              | 42                    | 55              |

Contd...

Supplementary Table 2: Contd...

| No. | Protein                                                                             | Gel 1            |            |                 |                       |                 |
|-----|-------------------------------------------------------------------------------------|------------------|------------|-----------------|-----------------------|-----------------|
|     |                                                                                     | Accession number | Mass (kDa) | Peptides number | Sequence coverage (%) | Spectral counts |
| 186 | tripeptidyl-peptidase 2                                                             | 186972143        | 138        | 24              | 22                    | 55              |
| 187 | single-stranded DNA-binding protein, mitochondrial precursor                        | 4507231          | 17         | 10              | 70                    | 54              |
| 188 | epididymal sperm-binding protein 1 precursor                                        | 301601648        | 26         | 9               | 44                    | 54              |
| 189 | cytochrome b-c1 complex subunit 1, mitochondrial precursor                          | 46593007         | 53         | 19              | 47                    | 54              |
| 190 | elongation factor 1-delta isoform 1                                                 | 304555581        | 71         | 8               | 17                    | 54              |
| 191 | heat shock 70 protein 4L                                                            | 31541941         | 95         | 26              | 36                    | 54              |
| 192 | keratin, type I cytoskeletal 16                                                     | 24430192         | 51         | 7               | 32                    | 54              |
| 193 | acrosomal protein SP-10 isoform a precursor                                         | 4501879          | 28         | 6               | 22                    | 53              |
| 194 | carboxypeptidase Z isoform 2 precursor                                              | 62388875         | 73         | 15              | 27                    | 53              |
| 195 | mitochondrial carrier homolog 2                                                     | 7657347          | 33         | 10              | 48                    | 53              |
| 196 | protein-glutamine gamma-glutamyltransferase 4                                       | 156627577        | 77         | 14              | 22                    | 51              |
| 197 | cytochrome c oxidase subunit 5B, mitochondrial precursor                            | 17017988         | 14         | 14              | 67                    | 51              |
| 198 | 60S acidic ribosomal protein PO                                                     | 16933546         | 34         | 11              | 47                    | 51              |
| 199 | uncharacterized protein C9orf9                                                      | 33285006         | 19         | 12              | 81                    | 51              |
| 200 | NADH dehydrogenase [ubiquinone] iron-sulfur protein 3, mitochondrial precursor      | 4758788          | 30         | 14              | 53                    | 51              |
| 201 | plastin-3 isoform 1                                                                 | 209862851        | 71         | 10              | 23                    | 51              |
| 202 | olfactomedin-4 precursor                                                            | 32313593         | 57         | 13              | 32                    | 50              |
| 203 | ferritin, mitochondrial precursor                                                   | 29126241         | 28         | 11              | 50                    | 50              |
| 204 | T-complex protein 1 subunit zeta isoform a                                          | 4502643          | 58         | 17              | 39                    | 50              |
| 205 | beta-2-microglobulin precursor                                                      | 4757826          | 14         | 4               | 38                    | 50              |
| 206 | nuclear pore complex protein Nup155 isoform 1                                       | 24430149         | 155        | 20              | 18                    | 50              |
| 207 | 14-3-3 protein sigma                                                                | 5454052          | 28         | 8               | 48                    | 50              |
| 208 | matrix-remodeling-associated protein 5 precursor                                    | 139948432        | 312        | 22              | 7.50                  | 49              |
| 209 | voltage-dependent anion-selective channel protein 3 isoform 1                       | 25188179         | 31         | 12              | 48                    | 49              |
| 210 | carbonic anhydrase 4 precursor                                                      | 4502519          | 35         | 11              | 34                    | 49              |
| 211 | actin-related protein T2                                                            | 29893808         | 42         | 14              | 55                    | 49              |
| 212 | fructose-bisphosphate aldolase C                                                    | 4885063          | 39         | 3               | 21                    | 49              |
| 213 | glutamine synthetase                                                                | 19923206         | 42         | 12              | 39                    | 48              |
| 214 | myeloid leukemia factor 1 isoform 1                                                 | 11967975         | 31         | 10              | 34                    | 48              |
| 215 | 26S protease regulatory subunit 6A                                                  | 21361144         | 49         | 14              | 38                    | 48              |
| 216 | dolichyl-diphosphooligosaccharide--protein glycosyltransferase 48 subunit precursor | 20070197         | 51         | 11              | 36                    | 47              |
| 217 | very long-chain specific acyl-CoA dehydrogenase, mitochondrial isoform 2 precursor  | 76496475         | 68         | 19              | 45                    | 46              |
| 218 | isocitrate dehydrogenase [NAD] subunit alpha, mitochondrial precursor               | 5031777          | 40         | 10              | 34                    | 46              |
| 219 | tektin-4                                                                            | 21389613         | 51         | 14              | 43                    | 45              |
| 220 | uncharacterized protein KIAA1683 isoform a                                          | 224451032        | 147        | 19              | 17                    | 45              |
| 221 | protein phosphatase 1 regulatory subunit 7                                          | 4506013          | 42         | 18              | 63                    | 45              |
| 222 | proteasome subunit beta type-5 isoform 1                                            | 4506201          | 28         | 10              | 39                    | 44              |
| 223 | sperm acrosome membrane-associated protein 3                                        | 27777653         | 23         | 8               | 33                    | 44              |
| 224 | 26S proteasome non-ATPase regulatory subunit 2                                      | 25777602         | 100        | 18              | 25                    | 44              |
| 225 | electron transfer flavoprotein subunit alpha, mitochondrial isoform a               | 4503607          | 35         | 14              | 64                    | 43              |
| 226 | hydroxyacyl-coenzyme A dehydrogenase, mitochondrial isoform 1 precursor             | 296179427        | 36         | 9               | 51                    | 43              |
| 227 | coiled-coil domain-containing protein 147                                           | 56961680         | 103        | 19              | 22                    | 43              |
| 228 | nucleoporin p54                                                                     | 26051237         | 55         | 13              | 34                    | 43              |
| 229 | mucin-6 precursor                                                                   | 151301154        | 257        | 19              | 10                    | 42              |
| 230 | nucleoside diphosphate kinase homolog 5                                             | 4505413          | 24         | 9               | 64                    | 42              |
| 231 | 26S protease regulatory subunit 8 isoform 1                                         | 24497435         | 46         | 10              | 35                    | 41              |
| 232 | profilin-1                                                                          | 4826898          | 15         | 7               | 51                    | 41              |
| 233 | ATP synthase subunit O, mitochondrial precursor                                     | 4502303          | 23         | 9               | 54                    | 41              |
| 234 | ATP synthase subunit d, mitochondrial isoform a                                     | 5453559          | 18         | 12              | 80                    | 41              |
| 235 | 26S proteasome non-ATPase regulatory subunit 13 isoform 1                           | 157502193        | 43         | 11              | 40                    | 41              |
| 236 | sodium/potassium-transporting ATPase subunit alpha-4 isoform 1                      | 153946397        | 114        | 17              | 19                    | 41              |
| 237 | 26S protease regulatory subunit 4                                                   | 24430151         | 49         | 14              | 21                    | 41              |
| 238 | glypican-4 precursor                                                                | 21614525         | 62         | 12              | 22                    | 41              |
| 239 | ras-related protein Rab-11B                                                         | 190358517        | 24         | 11              | 49                    | 40              |
| 240 | 3-hydroxyisobutyrate dehydrogenase, mitochondrial precursor                         | 23308751         | 35         | 9               | 30                    | 40              |

Contd...

Supplementary Table 2: Contd...

| No. | Protein                                                                                          | Gel 1            |            |                 |                       |                 |
|-----|--------------------------------------------------------------------------------------------------|------------------|------------|-----------------|-----------------------|-----------------|
|     |                                                                                                  | Accession number | Mass (kDa) | Peptides number | Sequence coverage (%) | Spectral counts |
| 241 | serpin B6                                                                                        | 41152086         | 43         | 14              | 48                    | 39              |
| 242 | cytochrome c1, heme protein, mitochondrial                                                       | 21359867         | 35         | 10              | 43                    | 39              |
| 243 | 26S proteasome non-ATPase regulatory subunit 7                                                   | 25777615         | 37         | 10              | 40                    | 39              |
| 244 | importin subunit alpha-2                                                                         | 4504897          | 58         | 14              | 50                    | 39              |
| 245 | alanyl-tRNA editing protein Aarsd1 isoform 1                                                     | 217416402        | 66         | 11              | 28                    | 39              |
| 246 | L-lactate dehydrogenase A chain isoform 3                                                        | 260099723        | 40         | 11              | 40                    | 38              |
| 247 | carboxypeptidase E preproprotein                                                                 | 4503009          | 53         | 9               | 19                    | 38              |
| 248 | proteasome subunit alpha type-5 isoform 1                                                        | 23110942         | 26         | 9               | 52                    | 38              |
| 249 | dolichyl-diphosphooligosaccharide--protein glycosyltransferase subunit 2 isoform 2 precursor     | 209413738        | 68         | 14              | 33                    | 38              |
| 250 | synaptophysin-like protein 1 isoform a                                                           | 5803185          | 29         | 5               | 30                    | 38              |
| 251 | 26S protease regulatory subunit 6B isoform 1                                                     | 5729991          | 47         | 12              | 38                    | 38              |
| 252 | nuclear pore complex protein Nup93 isoform 1                                                     | 208609990        | 93         | 16              | 24                    | 38              |
| 253 | SYNJ2BP-COX16 protein isoform 1                                                                  | 321400118        | 21         | 7               | 33                    | 38              |
| 254 | outer dense fiber protein 3                                                                      | 19526475         | 28         | 13              | 57                    | 38              |
| 255 | heme oxygenase 2                                                                                 | 8051608          | 36         | 12              | 46                    | 38              |
| 256 | FUN14 domain-containing protein 2                                                                | 24371248         | 21         | 11              | 55                    | 38              |
| 257 | erlin-1                                                                                          | 154800487        | 39         | 8               | 27                    | 38              |
| 258 | tetratricopeptide repeat protein 25                                                              | 13899233         | 77         | 14              | 13                    | 38              |
| 259 | ubiquitin-like modifier-activating enzyme 1                                                      | 23510340         | 118        | 9               | 8.20                  | 37              |
| 260 | nucleobindin-2 precursor                                                                         | 4826870          | 50         | 13              | 44                    | 37              |
| 261 | stress-70 protein, mitochondrial precursor                                                       | 24234688         | 74         | 13              | 29                    | 37              |
| 262 | isocitrate dehydrogenase [NAD] subunit beta, mitochondrial isoform a precursor                   | 28178821         | 42         | 13              | 44                    | 37              |
| 263 | importin-5                                                                                       | 24797086         | 126        | 13              | 17                    | 36              |
| 264 | protein FAM71B                                                                                   | 222418633        | 65         | 8               | 12                    | 36              |
| 265 | hyaluronidase PH-20 isoform 2                                                                    | 291290981        | 58         | 9               | 23                    | 36              |
| 266 | electron transfer flavoprotein subunit beta isoform 1                                            | 4503609          | 28         | 12              | 49                    | 36              |
| 267 | thioredoxin domain-containing protein 3                                                          | 148839372        | 67         | 15              | 31                    | 36              |
| 268 | protein NDRG1                                                                                    | 37655183         | 43         | 5               | 22                    | 35              |
| 269 | proteasome subunit alpha type-2                                                                  | 4506181          | 26         | 11              | 57                    | 35              |
| 270 | hsc70-interacting protein                                                                        | 19923193         | 41         | 6               | 20                    | 35              |
| 271 | collagen alpha-1(XVIII) chain isoform 1 precursor                                                | 110611235        | 154        | 10              | 9.00                  | 35              |
| 272 | vesicle-associated membrane protein-associated protein A isoform 2                               | 94721252         | 28         | 7               | 38                    | 35              |
| 273 | 26S proteasome non-ATPase regulatory subunit 11                                                  | 28872725         | 47         | 11              | 31                    | 35              |
| 274 | mitochondria-eating protein                                                                      | 21687119         | 61         | 9               | 18                    | 35              |
| 275 | epididymal secretory protein E3-beta precursor                                                   | 11641279         | 18         | 7               | 52                    | 35              |
| 276 | delta (3,5)-Delta (2,4)-dienoyl-CoA isomerase, mitochondrial precursor                           | 70995211         | 36         | 13              | 55                    | 35              |
| 277 | protein S100-A8                                                                                  | 21614544         | 11         | 7               | 53                    | 34              |
| 278 | transmembrane emp24 domain-containing protein 10 precursor                                       | 98986464         | 25         | 9               | 40                    | 34              |
| 279 | succinate dehydrogenase [ubiquinone] iron-sulfur subunit, mitochondrial precursor                | 115387094        | 32         | 12              | 38                    | 34              |
| 280 | uncharacterized protein C20orf107 precursor                                                      | 71043642         | 19         | 12              | 55                    | 34              |
| 281 | barrier-to-autointegration factor                                                                | 4502389          | 10         | 9               | 71                    | 34              |
| 282 | L-lactate dehydrogenase A-like 6B                                                                | 15082234         | 42         | 11              | 42                    | 34              |
| 283 | pyruvate dehydrogenase E1 component subunit alpha, testis-specific form, mitochondrial precursor | 4885543          | 43         | 12              | 39                    | 34              |
| 284 | thioredoxin-related transmembrane protein 4 precursor                                            | 40254947         | 39         | 5               | 17                    | 34              |
| 285 | signal peptidase complex subunit 2                                                               | 162417971        | 25         | 10              | 44                    | 34              |
| 286 | lysosomal alpha-glucosidase preproprotein                                                        | 119393891        | 105        | 9               | 11                    | 34              |
| 287 | maltase-glucoamylase, intestinal                                                                 | 221316699        | 210        | 14              | 10                    | 33              |
| 288 | glucose-6-phosphate isomerase isoform 2                                                          | 18201905         | 63         | 12              | 35                    | 33              |
| 289 | neprilysin                                                                                       | 116256329        | 86         | 12              | 19                    | 33              |
| 290 | glycerol kinase 2                                                                                | 41393575         | 61         | 10              | 24                    | 33              |
| 291 | axonemal dynein light intermediate polypeptide 1                                                 | 37595560         | 32         | 11              | 43                    | 33              |
| 292 | nuclear pore membrane glycoprotein 210 precursor                                                 | 27477134         | 205        | 14              | 9.40                  | 33              |
| 293 | anterior gradient protein 2 homolog precursor                                                    | 5453541          | 20         | 6               | 47                    | 33              |
| 294 | enoyl-CoA hydratase, mitochondrial                                                               | 194097323        | 31         | 12              | 48                    | 33              |
| 295 | prohibitin                                                                                       | 4505773          | 30         | 11              | 58                    | 33              |

Contd...

**Supplementary Table 2: Contd...**

| No. | Protein                                                                         | Gel 1            |            |                 |                       |                 |
|-----|---------------------------------------------------------------------------------|------------------|------------|-----------------|-----------------------|-----------------|
|     |                                                                                 | Accession number | Mass (kDa) | Peptides number | Sequence coverage (%) | Spectral counts |
| 296 | cytochrome b-c1 complex subunit 7 isoform 1                                     | 5454152          | 14         | 8               | 59                    | 33              |
| 297 | DPY30 domain-containing protein 1                                               | 20270377         | 21         | 7               | 42                    | 33              |
| 298 | calmodulin                                                                      | 58218968         | 17         | 9               | 81                    | 32              |
| 299 | histone H3.1                                                                    | 4504281          | 15         | 5               | 43                    | 32              |
| 300 | medium-chain specific acyl-CoA dehydrogenase, mitochondrial isoform b precursor | 187960098        | 47         | 12              | 35                    | 32              |
| 301 | chloride intracellular channel protein 1                                        | 14251209         | 27         | 6               | 36                    | 32              |
| 302 | protein DJ-1                                                                    | 31543380         | 20         | 13              | 87                    | 32              |
| 303 | synaptic vesicle membrane protein VAT-1 homolog                                 | 18379349         | 42         | 12              | 47                    | 32              |
| 304 | apolipoprotein A-I preproprotein                                                | 4557321          | 31         | 10              | 39                    | 32              |
| 305 | glucosidase 2 subunit beta isoform 1 precursor                                  | 48255889         | 59         | 9               | 18                    | 31              |
| 306 | 14-3-3 protein theta                                                            | 5803227          | 28         | 8               | 43                    | 31              |
| 307 | ADP/ATP translocase 4                                                           | 13775208         | 35         | 9               | 31                    | 31              |
| 308 | myosin-10                                                                       | 41406064         | 229        | 7               | 9.30                  | 31              |
| 309 | eukaryotic translation initiation factor 5A-1 isoform B                         | 219555712        | 17         | 8               | 51                    | 31              |
| 310 | reticulocalbin-2 precursor                                                      | 4506457          | 37         | 10              | 44                    | 31              |
| 311 | ras-related protein Rab-14                                                      | 19923483         | 24         | 10              | 56                    | 31              |
| 312 | short-chain specific acyl-CoA dehydrogenase, mitochondrial precursor            | 4557233          | 44         | 10              | 34                    | 31              |
| 313 | lysyl-tRNA synthetase isoform 1                                                 | 194272210        | 71         | 8               | 16                    | 31              |
| 314 | histone H2A type 2-A                                                            | 106775678        | 14         | 2               | 35                    | 31              |
| 315 | L-xylulose reductase isoform 1                                                  | 7705925          | 26         | 8               | 37                    | 30              |
| 316 | alpha-crystallin B chain                                                        | 4503057          | 20         | 11              | 55                    | 30              |
| 317 | ATP synthase subunit b, mitochondrial precursor                                 | 21361565         | 29         | 8               | 44                    | 30              |
| 318 | parkin coregulated gene protein isoform 2                                       | 122939202        | 29         | 9               | 46                    | 30              |
| 319 | radial spoke head protein 3 homolog                                             | 31543559         | 64         | 8               | 20                    | 30              |
| 320 | 2-oxoglutarate dehydrogenase, mitochondrial isoform 3 precursor                 | 259013553        | 116        | 14              | 18                    | 30              |
| 321 | proteasome subunit alpha type-7                                                 | 4506189          | 28         | 5               | 52                    | 30              |
| 322 | keratin, type I cytoskeletal 19                                                 | 24234699         | 44         | 5               | 34                    | 30              |
| 323 | aspartate aminotransferase, mitochondrial precursor                             | 73486658         | 48         | 10              | 35                    | 29              |
| 324 | 4-trimethylaminobutyraldehyde dehydrogenase                                     | 115387104        | 56         | 9               | 22                    | 29              |
| 325 | alcohol dehydrogenase [NADP+]                                                   | 24497577         | 37         | 9               | 30                    | 29              |
| 326 | nitric oxide synthase, endothelial isoform 1                                    | 40254422         | 133        | 7               | 7.70                  | 29              |
| 327 | vesicle-fusing ATPase                                                           | 156564401        | 83         | 12              | 18                    | 29              |
| 328 | protein dpy-19 homolog 2                                                        | 93277105         | 87         | 11              | 16                    | 29              |
| 329 | peptidyl-prolyl cis-trans isomerase FKBP4                                       | 4503729          | 52         | 12              | 33                    | 29              |
| 330 | enkurin                                                                         | 21450721         | 29         | 8               | 34                    | 29              |
| 331 | enoyl-CoA delta isomerase 1, mitochondrial isoform 2 precursor                  | 295842266        | 31         | 7               | 25                    | 29              |
| 332 | ES1 protein homolog, mitochondrial isoform 1a precursor                         | 296531406        | 28         | 8               | 41                    | 29              |
| 333 | endophilin-B1 isoform 2                                                         | 331284170        | 44         | 8               | 20                    | 29              |
| 334 | von Willebrand factor A domain-containing protein 1 isoform 1 precursor         | 40068485         | 47         | 12              | 44                    | 29              |
| 335 | large proline-rich protein BAG6 isoform a                                       | 149158692        | 119        | 10              | 14                    | 29              |
| 336 | ras-related protein Rab-2B isoform 1                                            | 21361884         | 24         | 3               | 56                    | 29              |
| 337 | glutamate carboxypeptidase 2 isoform 1                                          | 4758398          | 84         | 12              | 22                    | 28              |
| 338 | adenylate kinase 7                                                              | 148727333        | 83         | 9               | 11                    | 28              |
| 339 | uncharacterized protein C20orf106 precursor                                     | 71043622         | 20         | 5               | 54                    | 28              |
| 340 | stomatin-like protein 2                                                         | 7305503          | 39         | 9               | 47                    | 28              |
| 341 | coiled-coil domain-containing protein 63                                        | 22749217         | 66         | 11              | 26                    | 28              |
| 342 | alpha-actinin-1 isoform c                                                       | 194097352        | 103        | 6               | 16                    | 28              |
| 343 | glutathione S-transferase P                                                     | 4504183          | 23         | 6               | 52                    | 27              |
| 344 | annexin A4                                                                      | 4502105          | 36         | 12              | 42                    | 27              |
| 345 | proteasome subunit beta type-7 proprotein                                       | 4506203          | 30         | 11              | 42                    | 27              |
| 346 | 26S protease regulatory subunit 10B                                             | 195539395        | 46         | 9               | 23                    | 27              |
| 347 | flavin reductase (NADPH)                                                        | 4502419          | 22         | 4               | 24                    | 27              |
| 348 | ADP-ribosylation factor 1                                                       | 4502201          | 21         | 8               | 45                    | 27              |
| 349 | ras-related protein Rab-1B                                                      | 13569962         | 22         | 4               | 25                    | 27              |

Contd...

**Supplementary Table 2: Contd...**

| No. | Protein                                                                                                                              | Gel 1            |            |                 |                       |                 |
|-----|--------------------------------------------------------------------------------------------------------------------------------------|------------------|------------|-----------------|-----------------------|-----------------|
|     |                                                                                                                                      | Accession number | Mass (kDa) | Peptides number | Sequence coverage (%) | Spectral counts |
| 350 | isochorismatase domain-containing protein 2, mitochondrial isoform 2                                                                 | 13376007         | 24         | 6               | 60                    | 27              |
| 351 | 60S acidic ribosomal protein P2                                                                                                      | 4506671          | 12         | 6               | 74                    | 27              |
| 352 | 26S proteasome non-ATPase regulatory subunit 14                                                                                      | 5031981          | 35         | 9               | 47                    | 27              |
| 353 | kallikrein-2 isoform 1 precursor                                                                                                     | 5031829          | 29         | 6               | 27                    | 27              |
| 354 | calmin                                                                                                                               | 19923599         | 112        | 8               | 13                    | 27              |
| 355 | filamin-B isoform 2                                                                                                                  | 105990514        | 278        | 15              | 7.50                  | 26              |
| 356 | proteasome subunit alpha type-1 isoform 1                                                                                            | 23110935         | 30         | 9               | 39                    | 26              |
| 357 | G-protein coupled receptor 64 isoform 2 precursor                                                                                    | 119943116        | 110        | 7               | 9.40                  | 26              |
| 358 | 10 heat shock protein, mitochondrial                                                                                                 | 4504523          | 11         | 8               | 60                    | 26              |
| 359 | transmembrane emp24 domain-containing protein 9 precursor                                                                            | 39725636         | 27         | 9               | 20                    | 26              |
| 360 | protein FAM154A                                                                                                                      | 301129242        | 55         | 9               | 23                    | 26              |
| 361 | epididymal secretory protein E3-alpha precursor                                                                                      | 11386189         | 18         | 5               | 31                    | 26              |
| 362 | alpha-mannosidase 2C1                                                                                                                | 46852164         | 116        | 13              | 14                    | 26              |
| 363 | cullin-associated NEDD8-dissociated protein 1                                                                                        | 21361794         | 136        | 12              | 13                    | 25              |
| 364 | phosphatidylethanolamine-binding protein 1 preproprotein                                                                             | 4505621          | 21         | 6               | 57                    | 25              |
| 365 | sperm-associated antigen 6 isoform 1                                                                                                 | 6912678          | 55         | 9               | 34                    | 25              |
| 366 | carbonyl reductase [NADPH] 1                                                                                                         | 4502599          | 30         | 6               | 28                    | 25              |
| 367 | tektin-1                                                                                                                             | 16753231         | 48         | 8               | 29                    | 25              |
| 368 | testis-expressed protein 101 isoform 1                                                                                               | 194018544        | 29         | 5               | 23                    | 25              |
| 369 | malectin precursor                                                                                                                   | 7661948          | 32         | 9               | 41                    | 25              |
| 370 | protein S100-A11                                                                                                                     | 5032057          | 12         | 7               | 56                    | 25              |
| 371 | cytochrome b-c1 complex subunit Rieske, mitochondrial                                                                                | 163644321        | 30         | 8               | 30                    | 25              |
| 372 | calmegin precursor                                                                                                                   | 4758004          | 70         | 9               | 15                    | 25              |
| 373 | 26S proteasome non-ATPase regulatory subunit 3                                                                                       | 25777612         | 61         | 12              | 29                    | 25              |
| 374 | ubiquitin carboxyl-terminal hydrolase isozyme L3                                                                                     | 5174741          | 26         | 7               | 35                    | 25              |
| 375 | pyruvate dehydrogenase protein X component, mitochondrial isoform 2                                                                  | 203098816        | 51         | 10              | 25                    | 25              |
| 376 | GTP-binding nuclear protein Ran                                                                                                      | 5453555          | 24         | 7               | 23                    | 25              |
| 377 | 26S proteasome non-ATPase regulatory subunit 1 isoform 1                                                                             | 25777600         | 106        | 10              | 9.70                  | 25              |
| 378 | cAMP-dependent protein kinase catalytic subunit alpha isoform 2                                                                      | 46909584         | 40         | 7               | 26                    | 25              |
| 379 | keratin, type I cytoskeletal 18                                                                                                      | 4557888          | 48         | 9               | 33                    | 25              |
| 380 | sodium/potassium-transporting ATPase subunit alpha-2 proprotein                                                                      | 4502271          | 112        | 2               | 11                    | 25              |
| 381 | sodium/potassium-transporting ATPase subunit alpha-3                                                                                 | 22748667         | 112        | 2               | 12                    | 25              |
| 382 | proteasome subunit alpha type-6                                                                                                      | 23110944         | 27         | 9               | 43                    | 24              |
| 383 | proteasome subunit alpha type-3 isoform 2                                                                                            | 23110939         | 28         | 7               | 30                    | 24              |
| 384 | CDGSH iron-sulfur domain-containing protein 1                                                                                        | 8923930          | 12         | 6               | 56                    | 24              |
| 385 | adenyl cyclase-associated protein 1                                                                                                  | 5453595          | 52         | 8               | 17                    | 24              |
| 386 | hydroxyacylglutathione hydrolase, mitochondrial isoform 1 precursor                                                                  | 94538322         | 34         | 9               | 36                    | 24              |
| 387 | prenylcysteine oxidase 1 precursor                                                                                                   | 166795301        | 57         | 10              | 25                    | 24              |
| 388 | dnaJ homolog subfamily B member 11 precursor                                                                                         | 7706495          | 41         | 10              | 27                    | 24              |
| 389 | rab GDP dissociation inhibitor beta isoform 1                                                                                        | 6598323          | 51         | 10              | 27                    | 24              |
| 390 | beta-lactamase-like protein 2                                                                                                        | 7705793          | 33         | 9               | 43                    | 24              |
| 391 | dynactin subunit 1 isoform 1                                                                                                         | 13259510         | 142        | 13              | 8.50                  | 24              |
| 392 | dihydrolipoyllysine-residue succinyltransferase component of 2-oxoglutarate dehydrogenase complex, mitochondrial isoform 1 precursor | 19923748         | 49         | 11              | 36                    | 23              |
| 393 | proteasome subunit alpha type-7-like isoform 2                                                                                       | 68303563         | 28         | 8               | 42                    | 23              |
| 394 | proteasome subunit beta type-3                                                                                                       | 22538465         | 23         | 7               | 47                    | 23              |
| 395 | NADH-cytochrome b5 reductase 2                                                                                                       | 47778923         | 31         | 9               | 47                    | 23              |
| 396 | endoplasmic reticulum resident protein 44 precursor                                                                                  | 52487191         | 47         | 8               | 27                    | 23              |
| 397 | succinyl-CoA ligase [ADP-forming] subunit beta, mitochondrial precursor                                                              | 11321583         | 50         | 7               | 12                    | 23              |
| 398 | ras-related protein Rab-3B                                                                                                           | 19923750         | 25         | 5               | 22                    | 23              |
| 399 | vimentin                                                                                                                             | 62414289         | 54         | 8               | 24                    | 23              |
| 400 | acrosome formation-associated factor isoform 1                                                                                       | 239582757        | 33         | 6               | 30                    | 23              |
| 401 | abhydrolase domain-containing protein 10, mitochondrial precursor                                                                    | 8923001          | 34         | 7               | 33                    | 23              |
| 402 | adenylate kinase 8                                                                                                                   | 22749187         | 55         | 11              | 28                    | 23              |

Contd...



## Supplementary Table 2: Contd...

| No. | Protein                                                                                  | Gel 1            |            |                 |                       |                 |
|-----|------------------------------------------------------------------------------------------|------------------|------------|-----------------|-----------------------|-----------------|
|     |                                                                                          | Accession number | Mass (kDa) | Peptides number | Sequence coverage (%) | Spectral counts |
| 403 | histone H2A.V isoform 1                                                                  | 6912616          | 14         | 3               | 31                    | 23              |
| 404 | uncharacterized protein C1orf194                                                         | 171916088        | 18         | 6               | 55                    | 23              |
| 405 | beta-centractin                                                                          | 11342680         | 42         | 2               | 36                    | 23              |
| 406 | glutathione reductase, mitochondrial isoform 1 precursor                                 | 50301238         | 56         | 10              | 32                    | 22              |
| 407 | ras GTPase-activating-like protein IQGAP1                                                | 4506787          | 189        | 10              | 7.80                  | 22              |
| 408 | transmembrane protease serine 2 isoform 2                                                | 205360943        | 54         | 5               | 10                    | 22              |
| 409 | proteasome subunit beta type-6                                                           | 23110925         | 25         | 4               | 29                    | 22              |
| 410 | proteasome activator complex subunit 1 isoform 1                                         | 5453990          | 29         | 9               | 41                    | 22              |
| 411 | rho GDP-dissociation inhibitor 1 isoform a                                               | 4757768          | 23         | 4               | 26                    | 22              |
| 412 | cathepsin F precursor                                                                    | 6042196          | 53         | 7               | 13                    | 22              |
| 413 | NADH dehydrogenase [ubiquinone] flavoprotein 1, mitochondrial isoform 1 precursor        | 20149568         | 51         | 8               | 29                    | 22              |
| 414 | F-actin-capping protein subunit alpha-1                                                  | 5453597          | 33         | 5               | 34                    | 22              |
| 415 | transthyretin precursor                                                                  | 4507725          | 16         | 8               | 54                    | 22              |
| 416 | sodium/potassium-transporting ATPase subunit alpha-1 isoform a                           | 21361181         | 113        | 3               | 13                    | 22              |
| 417 | superoxide dismutase [Mn], mitochondrial isoform A precursor                             | 67782305         | 25         | 7               | 38                    | 21              |
| 418 | galectin-3-binding protein precursor                                                     | 5031863          | 65         | 6               | 11                    | 21              |
| 419 | proteasome subunit beta type-1                                                           | 4506193          | 26         | 7               | 40                    | 21              |
| 420 | uromodulin precursor                                                                     | 59850812         | 70         | 7               | 12                    | 21              |
| 421 | protein-L-isoaspartate (D-aspartate) O-methyltransferase isoform 2                       | 354983493        | 30         | 7               | 45                    | 21              |
| 422 | endoplasmic reticulum resident protein 29 isoform 1 precursor                            | 5803013          | 29         | 8               | 35                    | 21              |
| 423 | coiled-coil domain-containing protein 19, mitochondrial precursor                        | 81295816         | 66         | 7               | 15                    | 21              |
| 424 | membrane-associated progesterone receptor component 2                                    | 291621647        | 26         | 4               | 17                    | 21              |
| 425 | eukaryotic translation initiation factor 3 subunit F                                     | 4503519          | 38         | 7               | 23                    | 21              |
| 426 | lysozyme-like protein 4 precursor                                                        | 21389465         | 16         | 5               | 42                    | 21              |
| 427 | dnaJ homolog subfamily B member 1                                                        | 5453690          | 38         | 6               | 16                    | 21              |
| 428 | brain acid soluble protein 1                                                             | 30795231         | 23         | 6               | 40                    | 20              |
| 429 | WD repeat-containing protein 16 isoform b                                                | 124028512        | 68         | 9               | 13                    | 20              |
| 430 | 6-phosphogluconate dehydrogenase, decarboxylating                                        | 40068518         | 53         | 7               | 23                    | 20              |
| 431 | proteasome subunit alpha type-4 isoform 1                                                | 4506185          | 29         | 8               | 46                    | 20              |
| 432 | complement component 1 Q subcomponent-binding protein, mitochondrial precursor           | 4502491          | 31         | 6               | 32                    | 20              |
| 433 | hypoxanthine-guanine phosphoribosyltransferase                                           | 4504483          | 25         | 6               | 32                    | 20              |
| 434 | myosin regulatory light chain 12B                                                        | 15809016         | 20         | 7               | 51                    | 20              |
| 435 | transcription factor A, mitochondrial precursor                                          | 4507401          | 29         | 9               | 41                    | 20              |
| 436 | sperm acrosome-associated protein 5 precursor                                            | 120952755        | 18         | 5               | 31                    | 20              |
| 437 | uncharacterized protein C2orf57                                                          | 284413778        | 42         | 4               | 15                    | 20              |
| 438 | long-chain-fatty-acid--CoA ligase 6 isoform e                                            | 327412327        | 79         | 9               | 17                    | 20              |
| 439 | histone H1t                                                                              | 20544168         | 22         | 7               | 30                    | 20              |
| 440 | dnaJ homolog subfamily A member 2                                                        | 5031741          | 46         | 7               | 27                    | 20              |
| 441 | melanoma inhibitory activity protein 3 precursor                                         | 122891870        | 214        | 9               | 6.20                  | 20              |
| 442 | 14-3-3 protein beta/alpha                                                                | 21328448         | 28         | 3               | 35                    | 20              |
| 443 | normal mucosa of esophagus-specific gene 1 protein                                       | 37694067         | 10         | 5               | 52                    | 20              |
| 444 | solute carrier family 2, facilitated glucose transporter member 14                       | 23592238         | 56         | 6               | 13                    | 19              |
| 445 | protein NipSnap homolog 3A                                                               | 22267436         | 28         | 6               | 31                    | 19              |
| 446 | CD59 glycoprotein preproprotein                                                          | 187828910        | 14         | 5               | 26                    | 19              |
| 447 | NME1-NME2 protein                                                                        | 66392203         | 30         | 8               | 35                    | 19              |
| 448 | translin                                                                                 | 4759270          | 26         | 6               | 38                    | 19              |
| 449 | transmembrane protein 190 precursor                                                      | 21040263         | 19         | 6               | 39                    | 19              |
| 450 | nicastrin precursor                                                                      | 24638433         | 78         | 8               | 13                    | 19              |
| 451 | general vesicular transport factor p115                                                  | 4505541          | 108        | 9               | 8.90                  | 19              |
| 452 | kunitz-type protease inhibitor 3 precursor                                               | 189571689        | 10         | 3               | 29                    | 19              |
| 453 | coiled-coil-helix-coiled-coil-helix domain-containing protein 3, mitochondrial precursor | 8923390          | 26         | 6               | 19                    | 19              |
| 454 | sperm acrosome membrane-associated protein 4 precursor                                   | 19424138         | 13         | 2               | 22                    | 19              |

Contd...

Supplementary Table 2: Contd...

| No. | Protein                                                                        | Gel 1            |            |                 |                       |                 |
|-----|--------------------------------------------------------------------------------|------------------|------------|-----------------|-----------------------|-----------------|
|     |                                                                                | Accession number | Mass (kDa) | Peptides number | Sequence coverage (%) | Spectral counts |
| 455 | deoxyguanosine kinase, mitochondrial isoform a precursor                       | 18426967         | 32         | 7               | 35                    | 19              |
| 456 | coiled-coil domain-containing protein 105                                      | 226492892        | 57         | 7               | 16                    | 19              |
| 457 | cytochrome c                                                                   | 11128019         | 12         | 5               | 46                    | 19              |
| 458 | NADH dehydrogenase [ubiquinone] iron-sulfur protein 6, mitochondrial precursor | 4758792          | 14         | 6               | 61                    | 19              |
| 459 | L-lactate dehydrogenase B chain                                                | 4557032          | 37         | 6               | 31                    | 19              |
| 460 | ADP-ribosylation factor 4                                                      | 4502205          | 21         | 4               | 52                    | 19              |
| 461 | lipid phosphate phosphohydrolase 1 isoform 1                                   | 29171736         | 32         | 3               | 16                    | 18              |
| 462 | sodium/potassium-transporting ATPase subunit beta-3                            | 4502281          | 32         | 8               | 33                    | 18              |
| 463 | lactoylglutathione lyase                                                       | 118402586        | 21         | 5               | 22                    | 18              |
| 464 | glypican-1 precursor                                                           | 167001141        | 62         | 7               | 10                    | 18              |
| 465 | thioredoxin reductase 2, mitochondrial precursor                               | 22035672         | 57         | 7               | 27                    | 18              |
| 466 | transmembrane and coiled-coil domain-containing protein 2                      | 56847610         | 20         | 5               | 33                    | 18              |
| 467 | extracellular matrix protein 1 isoform 3 precursor                             | 322302700        | 64         | 7               | 12                    | 18              |
| 468 | translationally-controlled tumor protein                                       | 4507669          | 20         | 4               | 24                    | 18              |
| 469 | uncharacterized protein C9orf24 isoform 1                                      | 21362074         | 30         | 7               | 29                    | 18              |
| 470 | EGF-like repeat and discoidin I-like domain-containing protein 3 precursor     | 31317224         | 54         | 8               | 24                    | 18              |
| 471 | NADH dehydrogenase [ubiquinone] 1 beta subcomplex subunit 10                   | 4758774          | 21         | 6               | 37                    | 18              |
| 472 | prostate and testis expressed protein 1 precursor                              | 19923082         | 14         | 6               | 55                    | 18              |
| 473 | EF-hand domain-containing family member C2                                     | 31542743         | 87         | 6               | 7.30                  | 18              |
| 474 | 26S proteasome non-ATPase regulatory subunit 8                                 | 156631005        | 40         | 7               | 26                    | 18              |
| 475 | EF-hand domain-containing protein 1 isoform 1                                  | 156616292        | 74         | 8               | 14                    | 18              |
| 476 | nucleotide exchange factor SIL1 precursor                                      | 11968009         | 52         | 7               | 16                    | 18              |
| 477 | adenylate kinase 2, mitochondrial isoform a                                    | 4502013          | 26         | 6               | 36                    | 18              |
| 478 | nuclear pore glycoprotein p62                                                  | 24497605         | 53         | 5               | 12                    | 18              |
| 479 | aspartyl aminopeptidase                                                        | 156416028        | 53         | 8               | 30                    | 17              |
| 480 | lysosome-associated membrane glycoprotein 1 precursor                          | 112380628        | 45         | 5               | 12                    | 17              |
| 481 | proteasome subunit beta type-4                                                 | 22538467         | 29         | 7               | 39                    | 17              |
| 482 | dynein heavy chain 8, axonemal                                                 | 332688227        | 539        | 10              | 2.40                  | 17              |
| 483 | calpain small subunit 1                                                        | 51599151         | 28         | 5               | 20                    | 17              |
| 484 | dynein heavy chain 17, axonemal                                                | 256542310        | 509        | 8               | 2.90                  | 17              |
| 485 | hornerin                                                                       | 57864582         | 282        | 7               | 5.20                  | 17              |
| 486 | 26S protease regulatory subunit 7 isoform 1                                    | 4506209          | 49         | 7               | 22                    | 17              |
| 487 | eukaryotic initiation factor 4A-I isoform 1                                    | 4503529          | 46         | 6               | 21                    | 17              |
| 488 | carboxypeptidase D isoform 1 precursor                                         | 22202611         | 153        | 9               | 9.50                  | 17              |
| 489 | lactadherin isoform a preproprotein                                            | 167830475        | 43         | 5               | 18                    | 17              |
| 490 | bifunctional aminoacyl-tRNA synthetase                                         | 62241042         | 171        | 8               | 5.70                  | 17              |
| 491 | receptor expression-enhancing protein 6                                        | 19923919         | 21         | 5               | 22                    | 17              |
| 492 | serine/threonine-protein phosphatase PP1-beta catalytic subunit isoform 1      | 4506005          | 37         | 5               | 21                    | 17              |
| 493 | ribonuclease-like protein 13 precursor                                         | 59276062         | 18         | 5               | 33                    | 17              |
| 494 | keratin, type II cytoskeletal 8                                                | 4504919          | 54         | 4               | 14                    | 17              |
| 495 | exportin-7                                                                     | 154448892        | 124        | 8               | 9.20                  | 17              |
| 496 | leucine zipper transcription factor-like protein 1                             | 9966793          | 35         | 7               | 23                    | 17              |
| 497 | 40S ribosomal protein SA                                                       | 59859885         | 33         | 6               | 35                    | 17              |
| 498 | acyl-CoA-binding protein isoform 5                                             | 295842514        | 14         | 5               | 44                    | 17              |
| 499 | voltage-dependent anion-selective channel protein 1                            | 4507879          | 31         | 6               | 23                    | 17              |
| 500 | L-amino-acid oxidase isoform 2 precursor                                       | 27477089         | 65         | 7               | 19                    | 17              |
| 501 | uncharacterized protein C15orf26                                               | 148747373        | 34         | 6               | 25                    | 17              |
| 502 | cytochrome c oxidase subunit 6A1, mitochondrial precursor                      | 17999528         | 12         | 2               | 43                    | 17              |
| 503 | adenosylhomocysteinase isoform 1                                               | 9951915          | 48         | 9               | 24                    | 16              |
| 504 | protein S100-A9                                                                | 4506773          | 13         | 6               | 53                    | 16              |
| 505 | tektin-5                                                                       | 21389569         | 56         | 7               | 18                    | 16              |
| 506 | copper homeostasis protein cutC homolog                                        | 148596990        | 29         | 7               | 41                    | 16              |

Contd...

**Supplementary Table 2: Contd...**

| No. | Protein                                                                        | Gel 1            |            |                 |                       |                 |
|-----|--------------------------------------------------------------------------------|------------------|------------|-----------------|-----------------------|-----------------|
|     |                                                                                | Accession number | Mass (kDa) | Peptides number | Sequence coverage (%) | Spectral counts |
| 507 | membrane-associated progesterone receptor component 1                          | 5729875          | 22         | 6               | 24                    | 16              |
| 508 | T-complex protein 11 homolog isoform 1                                         | 148226214        | 57         | 5               | 19                    | 16              |
| 509 | testis-specific H1 histone                                                     | 32401437         | 28         | 4               | 13                    | 16              |
| 510 | glycodelin precursor                                                           | 65507501         | 21         | 3               | 24                    | 16              |
| 511 | phosphoglycerate mutase 2                                                      | 50593010         | 29         | 8               | 46                    | 16              |
| 512 | adenine phosphoribosyltransferase isoform a                                    | 4502171          | 20         | 6               | 43                    | 16              |
| 513 | alpha-soluble NSF attachment protein                                           | 47933379         | 33         | 8               | 39                    | 16              |
| 514 | cytochrome c oxidase subunit 6B1                                               | 4502985          | 10         | 5               | 57                    | 16              |
| 515 | serine/threonine-protein phosphatase with EF-hands 1 isoform 1b                | 23312374         | 73         | 6               | 11                    | 16              |
| 516 | ATP synthase subunit gamma, mitochondrial isoform L (liver) precursor          | 50345988         | 33         | 6               | 22                    | 16              |
| 517 | LETM1 and EF-hand domain-containing protein 1, mitochondrial precursor         | 6912482          | 83         | 7               | 12                    | 16              |
| 518 | heme-binding protein 2                                                         | 7657603          | 23         | 4               | 20                    | 16              |
| 519 | transcription elongation factor B polypeptide 1 isoform a                      | 325652033        | 12         | 5               | 51                    | 16              |
| 520 | transmembrane protein 89 precursor                                             | 56847630         | 18         | 4               | 28                    | 16              |
| 521 | cadherin-1 preproprotein                                                       | 4757960          | 97         | 5               | 5.80                  | 16              |
| 522 | programmed cell death protein 6                                                | 7019485          | 22         | 7               | 61                    | 16              |
| 523 | histone H2A-Bbd type 2/3                                                       | 63029935         | 13         | 5               | 67                    | 16              |
| 524 | eukaryotic translation initiation factor 3 subunit I                           | 4503513          | 37         | 6               | 31                    | 16              |
| 525 | 14-3-3 protein gamma                                                           | 21464101         | 28         | 2               | 20                    | 16              |
| 526 | NADH dehydrogenase [ubiquinone] 1 alpha subcomplex subunit 5                   | 4826848          | 13         | 6               | 66                    | 16              |
| 527 | 3-hydroxyacyl-CoA dehydrogenase type-2 isoform 1                               | 4758504          | 27         | 6               | 33                    | 16              |
| 528 | myeloperoxidase precursor                                                      | 4557759          | 84         | 9               | 16                    | 15              |
| 529 | zinc-alpha-2-glycoprotein precursor                                            | 4502337          | 34         | 6               | 27                    | 15              |
| 530 | ras-related protein Rab-27B                                                    | 5729997          | 25         | 6               | 26                    | 15              |
| 531 | prostasin preproprotein                                                        | 4506153          | 36         | 5               | 22                    | 15              |
| 532 | plasma membrane calcium-transporting ATPase 4 isoform 4b                       | 48255957         | 134        | 7               | 6.90                  | 15              |
| 533 | zymogen granule protein 16 homolog B precursor                                 | 94536866         | 23         | 4               | 27                    | 15              |
| 534 | dynactin subunit 2                                                             | 5453629          | 45         | 5               | 18                    | 15              |
| 535 | 40S ribosomal protein S3a                                                      | 4506723          | 30         | 6               | 28                    | 15              |
| 536 | dnaJ homolog subfamily B member 8                                              | 23503241         | 26         | 6               | 36                    | 15              |
| 537 | kinectin isoform a                                                             | 33620775         | 156        | 8               | 6.60                  | 15              |
| 538 | transmembrane emp24 domain-containing protein 4 precursor                      | 33457308         | 26         | 4               | 25                    | 15              |
| 539 | EF-hand calcium-binding domain-containing protein 6 isoform a                  | 38570107         | 173        | 7               | 6.70                  | 15              |
| 540 | histidine triad nucleotide-binding protein 1                                   | 4885413          | 14         | 6               | 72                    | 15              |
| 541 | NADH dehydrogenase [ubiquinone] iron-sulfur protein 8, mitochondrial precursor | 4505371          | 24         | 4               | 20                    | 15              |
| 542 | fatty acid-binding protein, epidermal                                          | 4557581          | 15         | 6               | 38                    | 15              |
| 543 | ADP/ATP translocase 2                                                          | 156071459        | 33         | 5               | 24                    | 15              |
| 544 | serine/threonine-protein phosphatase PGAM5, mitochondrial isoform 1            | 281604136        | 32         | 4               | 12                    | 15              |
| 545 | cullin-3                                                                       | 4503165          | 89         | 10              | 17                    | 15              |
| 546 | phosphoglycerate mutase 1                                                      | 4505753          | 29         | 5               | 46                    | 15              |
| 547 | RPS10-NUDT3 protein                                                            | 321117084        | 33         | 3               | 14                    | 15              |
| 548 | cancer/testis antigen 47A                                                      | 121949786        | 30         | 4               | 25                    | 15              |
| 549 | eukaryotic initiation factor 4A-II                                             | 83700235         | 46         | 2               | 21                    | 15              |
| 550 | 14-3-3 protein eta                                                             | 4507951          | 28         | 2               | 20                    | 15              |
| 551 | cofilin-2 isoform 1                                                            | 33946278         | 19         | 2               | 39                    | 15              |
| 552 | aspartate aminotransferase, cytoplasmic                                        | 4504067          | 46         | 7               | 28                    | 14              |
| 553 | epididymal secretory protein E1 precursor                                      | 5453678          | 17         | 5               | 39                    | 14              |
| 554 | gamma-glutamyltranspeptidase 1 precursor                                       | 73915090         | 61         | 4               | 7.20                  | 14              |
| 555 | casein kinase II subunit alpha isoform a                                       | 29570791         | 45         | 5               | 23                    | 14              |
| 556 | protein ERGIC-53 precursor                                                     | 5031873          | 58         | 5               | 9.40                  | 14              |
| 557 | beta-defensin 129 precursor                                                    | 18250304         | 20         | 5               | 30                    | 14              |
| 558 | receptor expression-enhancing protein 5                                        | 115430112        | 21         | 3               | 11                    | 14              |

Contd...

Supplementary Table 2: Contd...

| No. | Protein                                                                      | Accession number | Mass (kDa) | Peptides number | Sequence coverage (%) | Spectral counts |
|-----|------------------------------------------------------------------------------|------------------|------------|-----------------|-----------------------|-----------------|
| 559 | endoplasmic reticulum-Golgi intermediate compartment protein 3 isoform a     | 38327615         | 44         | 6               | 15                    | 14              |
| 560 | vesicle-associated membrane protein 3                                        | 4759300          | 11         | 5               | 41                    | 14              |
| 561 | BPI fold-containing family A member 3 isoform 1 precursor                    | 109627654        | 28         | 4               | 28                    | 14              |
| 562 | metalloproteinase inhibitor 1 precursor                                      | 4507509          | 23         | 5               | 37                    | 14              |
| 563 | 40S ribosomal protein S2                                                     | 15055539         | 31         | 6               | 21                    | 14              |
| 564 | ropporin-1-like protein                                                      | 17572807         | 26         | 6               | 29                    | 14              |
| 565 | basigin isoform 2 precursor                                                  | 38372925         | 29         | 5               | 26                    | 14              |
| 566 | ATPase inhibitor, mitochondrial isoform 1 precursor                          | 7705927          | 12         | 2               | 7.50                  | 14              |
| 567 | speriolin isoform 1                                                          | 197276668        | 62         | 4               | 6.90                  | 14              |
| 568 | calcium-binding and spermatid-specific protein 1                             | 90652863         | 43         | 3               | 10                    | 14              |
| 569 | retinoid-inducible serine carboxypeptidase precursor                         | 11055992         | 51         | 7               | 18                    | 14              |
| 570 | translocon-associated protein subunit alpha precursor                        | 169404009        | 32         | 3               | 12                    | 14              |
| 571 | histidine triad nucleotide-binding protein 2, mitochondrial precursor        | 14211923         | 17         | 4               | 37                    | 14              |
| 572 | NADH dehydrogenase [ubiquinone] flavoprotein 2, mitochondrial precursor      | 222080062        | 27         | 5               | 24                    | 14              |
| 573 | serine protease 58 precursor                                                 | 48255915         | 27         | 5               | 26                    | 14              |
| 574 | 40S ribosomal protein S18                                                    | 11968182         | 18         | 5               | 31                    | 14              |
| 575 | 40S ribosomal protein S16                                                    | 4506691          | 16         | 3               | 19                    | 14              |
| 576 | ATP synthase subunit g, mitochondrial                                        | 51479156         | 11         | 4               | 47                    | 14              |
| 577 | tryptophanyl-tRNA synthetase, cytoplasmic isoform b                          | 47419918         | 49         | 6               | 23                    | 14              |
| 578 | mitochondrial import receptor subunit TOM22 homolog                          | 9910382          | 16         | 4               | 54                    | 14              |
| 579 | heterogeneous nuclear ribonucleoprotein M isoform a                          | 14141152         | 78         | 7               | 9.90                  | 14              |
| 580 | dnaJ homolog subfamily B member 13                                           | 39204547         | 36         | 5               | 20                    | 14              |
| 581 | nidogen-1 precursor                                                          | 115298674        | 136        | 7               | 8.30                  | 14              |
| 582 | sortilin isoform 1 preproprotein                                             | 17149834         | 92         | 5               | 7.20                  | 14              |
| 583 | serine/threonine-protein phosphatase 2A activator isoform b                  | 29725611         | 37         | 5               | 27                    | 14              |
| 584 | ATP synthase subunit e, mitochondrial                                        | 6005717          | 8          | 4               | 46                    | 14              |
| 585 | cytochrome c oxidase subunit 6C proprotein                                   | 4758040          | 9          | 4               | 37                    | 14              |
| 586 | chitinase domain-containing protein 1 isoform a                              | 218083142        | 45         | 6               | 21                    | 14              |
| 587 | UBX domain-containing protein 11 isoform 1                                   | 116734681        | 54         | 5               | 16                    | 14              |
| 588 | coiled-coil domain-containing protein 40 isoform 1                           | 148664197        | 130        | 7               | 6.70                  | 14              |
| 589 | ras-related protein Rab-1A isoform 1                                         | 4758988          | 23         | 3               | 32                    | 14              |
| 590 | CD177 antigen precursor                                                      | 110735433        | 46         | 5               | 17                    | 13              |
| 591 | glucosamine--fructose-6-phosphate aminotransferase [isomerizing] 1 isoform 1 | 347659028        | 79         | 5               | 8.70                  | 13              |
| 592 | neutrophil defensin 3 preproprotein                                          | 4885179          | 10         | 4               | 20                    | 13              |
| 593 | mesencephalic astrocyte-derived neurotrophic factor precursor                | 299523086        | 21         | 6               | 32                    | 13              |
| 594 | transmembrane emp24 domain-containing protein 7 precursor                    | 32996709         | 25         | 4               | 21                    | 13              |
| 595 | uncharacterized protein C7orf61                                              | 51972226         | 24         | 4               | 24                    | 13              |
| 596 | stress-induced-phosphoprotein 1                                              | 5803181          | 63         | 4               | 9.80                  | 13              |
| 597 | kelch-like protein 10                                                        | 148664209        | 69         | 7               | 17                    | 13              |
| 598 | COP9 signalosome complex subunit 4                                           | 38373690         | 46         | 4               | 7.90                  | 13              |
| 599 | ras-related protein Ral-A precursor                                          | 33946329         | 24         | 3               | 13                    | 13              |
| 600 | disintegrin and metalloproteinase domain-containing protein 7 preproprotein  | 114326453        | 86         | 6               | 9.20                  | 13              |
| 601 | lysozyme-like protein 6 precursor                                            | 9966905          | 17         | 3               | 42                    | 13              |
| 602 | izumo sperm-egg fusion protein 2 precursor                                   | 63999117         | 25         | 4               | 14                    | 13              |
| 603 | C-Myc-binding protein                                                        | 57242777         | 12         | 6               | 65                    | 13              |
| 604 | glycerol kinase isoform a                                                    | 42794763         | 58         | 2               | 11                    | 13              |
| 605 | NAD-dependent malic enzyme, mitochondrial isoform 1 precursor [Homo          | 4505145          | 65         | 6               | 19                    | 13              |
| 606 | importin subunit alpha-4                                                     | 34485722         | 58         | 6               | 14                    | 13              |
| 607 | cytoplasmic dynein 1 heavy chain 1                                           | 33350932         | 532        | 8               | 2.20                  | 12              |
| 608 | alpha-1-antitrypsin precursor                                                | 50363217         | 47         | 4               | 14                    | 12              |
| 609 | ribonuclease inhibitor                                                       | 42822872         | 50         | 6               | 14                    | 12              |
| 610 | acylamino-acid-releasing enzyme                                              | 23510451         | 81         | 5               | 11                    | 12              |

Contd...

Supplementary Table 2: Contd...

| No. | Protein                                                                        | Accession number | Mass (kDa) | Peptides number | Sequence coverage (%) | Spectral counts |
|-----|--------------------------------------------------------------------------------|------------------|------------|-----------------|-----------------------|-----------------|
| 611 | annexin A11                                                                    | 22165431         | 54         | 4               | 10                    | 12              |
| 612 | platelet-activating factor acetylhydrolase precursor                           | 270133071        | 50         | 4               | 15                    | 12              |
| 613 | serine/threonine-protein phosphatase 2A 65 regulatory subunit A alpha isoform  | 21361399         | 65         | 6               | 14                    | 12              |
| 614 | leukocyte surface antigen CD47 isoform 1 precursor                             | 4502673          | 35         | 2               | 5.90                  | 12              |
| 615 | interferon-inducible GTPase 5                                                  | 10257429         | 50         | 6               | 25                    | 12              |
| 616 | 26S proteasome non-ATPase regulatory subunit 12 isoform 1                      | 4506221          | 53         | 4               | 13                    | 12              |
| 617 | slit homolog 2 protein precursor                                               | 4759146          | 170        | 8               | 7.50                  | 12              |
| 618 | tomoregulin-2 precursor                                                        | 12383051         | 41         | 5               | 13                    | 12              |
| 619 | fragile X mental retardation 1 neighbor protein                                | 22749199         | 29         | 4               | 20                    | 12              |
| 620 | thioredoxin isoform 1                                                          | 50592994         | 12         | 4               | 43                    | 12              |
| 621 | malate dehydrogenase, cytoplasmic isoform 1                                    | 312283701        | 39         | 6               | 27                    | 12              |
| 622 | mRNA export factor                                                             | 62739173         | 41         | 4               | 16                    | 12              |
| 623 | 45 calcium-binding protein isoform 2 precursor                                 | 18699732         | 42         | 5               | 23                    | 12              |
| 624 | uncharacterized protein C6orf81                                                | 31542280         | 41         | 4               | 19                    | 12              |
| 625 | 40S ribosomal protein S8                                                       | 4506743          | 24         | 4               | 19                    | 12              |
| 626 | histone H2B type 1-M                                                           | 4504263          | 14         | 2               | 32                    | 12              |
| 627 | cytochrome b-c1 complex subunit 6, mitochondrial                               | 83627705         | 11         | 4               | 58                    | 12              |
| 628 | UPF0733 protein C2orf88                                                        | 110349742        | 11         | 6               | 68                    | 12              |
| 629 | translin-associated protein X                                                  | 5174731          | 33         | 6               | 33                    | 12              |
| 630 | signal peptidase complex catalytic subunit SEC11A                              | 7657609          | 21         | 4               | 31                    | 12              |
| 631 | A disintegrin and metalloproteinase with thrombospondin motifs 1 preproprotein | 50845384         | 105        | 4               | 5.50                  | 12              |
| 632 | sulfatase-modifying factor 2 isoform e precursor                               | 194248090        | 39         | 4               | 14                    | 12              |
| 633 | heat shock 70 protein 13 precursor                                             | 48928056         | 52         | 5               | 15                    | 12              |
| 634 | acyl-coenzyme A thioesterase 13 isoform 2                                      | 231567183        | 12         | 4               | 35                    | 12              |
| 635 | dynein light chain roadblock-type 2                                            | 18702323         | 11         | 3               | 34                    | 12              |
| 636 | nucleoporin p58/p45 isoform a                                                  | 30102928         | 61         | 6               | 13                    | 12              |
| 637 | clathrin light chain A isoform a                                               | 4502899          | 24         | 4               | 22                    | 12              |
| 638 | 40S ribosomal protein S19                                                      | 4506695          | 16         | 4               | 30                    | 12              |
| 639 | ras-related protein Rab-5C isoform a                                           | 41393614         | 23         | 4               | 24                    | 11              |
| 640 | acid ceramidase isoform b                                                      | 189011546        | 47         | 5               | 11                    | 11              |
| 641 | proteasome subunit beta type-2 isoform 1                                       | 4506195          | 23         | 6               | 50                    | 11              |
| 642 | poly (rC)-binding protein 1                                                    | 222352151        | 37         | 4               | 12                    | 11              |
| 643 | ecto-ADP-ribosyltransferase 3 isoform a precursor                              | 194097380        | 44         | 4               | 12                    | 11              |
| 644 | ribose-phosphate pyrophosphokinase 2 isoform 2                                 | 4506129          | 35         | 5               | 23                    | 11              |
| 645 | 3-ketoacyl-CoA thiolase, mitochondrial                                         | 167614485        | 42         | 6               | 25                    | 11              |
| 646 | V-type proton ATPase catalytic subunit A                                       | 19913424         | 68         | 6               | 19                    | 11              |
| 647 | GLIPR1-like protein 1 precursor                                                | 22749527         | 26         | 3               | 16                    | 11              |
| 648 | 40S ribosomal protein S9                                                       | 14141193         | 23         | 3               | 12                    | 11              |
| 649 | desmoplakin isoform I                                                          | 58530840         | 332        | 7               | 3.00                  | 11              |
| 650 | actin-related protein M1                                                       | 221139714        | 41         | 4               | 18                    | 11              |
| 651 | dnaJ homolog subfamily A member 4 isoform 2                                    | 194328760        | 45         | 6               | 18                    | 11              |
| 652 | semaphorin-3C precursor                                                        | 5454048          | 85         | 3               | 6.10                  | 11              |
| 653 | apolipoprotein A-IV precursor                                                  | 71773110         | 45         | 5               | 15                    | 11              |
| 654 | testis, prostate and placenta-expressed protein isoform 2 precursor            | 154759245        | 31         | 5               | 26                    | 11              |
| 655 | enoyl-CoA delta isomerase 2, mitochondrial isoform 2                           | 260274832        | 44         | 7               | 22                    | 11              |
| 656 | stromal cell-derived factor 2-like protein 1 precursor                         | 56243533         | 24         | 5               | 44                    | 11              |
| 657 | actin-like protein 7A                                                          | 5729720          | 49         | 4               | 18                    | 11              |
| 658 | methionyl-tRNA synthetase, cytoplasmic                                         | 14043022         | 101        | 6               | 8.90                  | 11              |
| 659 | apoptosis-inducing factor 1, mitochondrial isoform 2 precursor                 | 22202629         | 66         | 5               | 11                    | 11              |
| 660 | profilin-3                                                                     | 71274140         | 15         | 5               | 51                    | 11              |
| 661 | transmembrane protein 126A isoform 1                                           | 14150017         | 22         | 4               | 34                    | 11              |
| 662 | aldose reductase                                                               | 4502049          | 36         | 5               | 26                    | 10              |
| 663 | glycogen phosphorylase, brain form                                             | 21361370         | 97         | 4               | 4.70                  | 10              |
| 664 | superoxide dismutase [Cu-Zn]                                                   | 4507149          | 16         | 4               | 60                    | 10              |

Contd...

**Supplementary Table 2: Contd...**

| No. | Protein                                                                      | Gel 1            |            |                 |                       |                 |
|-----|------------------------------------------------------------------------------|------------------|------------|-----------------|-----------------------|-----------------|
|     |                                                                              | Accession number | Mass (kDa) | Peptides number | Sequence coverage (%) | Spectral counts |
| 665 | purine nucleoside phosphorylase                                              | 157168362        | 32         | 5               | 24                    | 10              |
| 666 | ras-related protein Rab-7a                                                   | 34147513         | 23         | 5               | 28                    | 10              |
| 667 | carnitine O-acetyltransferase precursor                                      | 21618331         | 71         | 5               | 7.70                  | 10              |
| 668 | acyl carrier protein, mitochondrial precursor                                | 4826852          | 17         | 3               | 12                    | 10              |
| 669 | atlastin-3                                                                   | 45827806         | 61         | 4               | 14                    | 10              |
| 670 | serine/threonine-protein phosphatase 2A catalytic subunit alpha isoform      | 4506017          | 36         | 4               | 21                    | 10              |
| 671 | ubiquitin thioesterase OTUB1                                                 | 109148508        | 31         | 5               | 24                    | 10              |
| 672 | erythrocyte band 7 integral membrane protein isoform a                       | 38016911         | 32         | 4               | 20                    | 10              |
| 673 | serine protease inhibitor Kazal-type 2 precursor                             | 10863911         | 9          | 2               | 36                    | 10              |
| 674 | regenerating islet-derived protein 3-gamma precursor                         | 38348213         | 19         | 3               | 27                    | 10              |
| 675 | casein kinase II subunit beta                                                | 23503295         | 25         | 5               | 25                    | 10              |
| 676 | aspartyl-tRNA synthetase, cytoplasmic                                        | 45439306         | 57         | 5               | 9.60                  | 10              |
| 677 | septin-7 isoform 2                                                           | 148352329        | 51         | 5               | 19                    | 10              |
| 678 | nitrilase homolog 1 isoform 3                                                | 297632348        | 34         | 4               | 14                    | 10              |
| 679 | signal peptidase complex subunit 3                                           | 11345462         | 20         | 4               | 22                    | 10              |
| 680 | transcription elongation factor B polypeptide 2 isoform b                    | 46276893         | 18         | 5               | 34                    | 10              |
| 681 | 40S ribosomal protein S12                                                    | 14277700         | 15         | 5               | 51                    | 10              |
| 682 | 26S proteasome non-ATPase regulatory subunit 4                               | 5292161          | 41         | 4               | 11                    | 10              |
| 683 | mitochondrial import receptor subunit TOM34                                  | 21361356         | 35         | 4               | 13                    | 10              |
| 684 | heat shock 70 protein 4                                                      | 38327039         | 94         | 3               | 4.50                  | 10              |
| 685 | acetyl-CoA acetyltransferase, cytosolic                                      | 148539872        | 41         | 4               | 17                    | 10              |
| 686 | nuclear migration protein nudC                                               | 5729953          | 38         | 4               | 15                    | 10              |
| 687 | eukaryotic translation elongation factor 1 epsilon-1 isoform 1               | 4758862          | 20         | 4               | 34                    | 10              |
| 688 | dynein light chain Tctex-type 1                                              | 5730085          | 12         | 4               | 30                    | 10              |
| 689 | metalloproteinase inhibitor 3 precursor                                      | 4507513          | 24         | 5               | 25                    | 10              |
| 690 | carbonic anhydrase 2                                                         | 4557395          | 29         | 4               | 20                    | 10              |
| 691 | NADH dehydrogenase [ubiquinone] 1 beta subcomplex subunit 7                  | 10764847         | 16         | 4               | 26                    | 10              |
| 692 | 40S ribosomal protein S17                                                    | 4506693          | 16         | 3               | 43                    | 10              |
| 693 | dynein heavy chain 7, axonemal                                               | 151301127        | 461        | 4               | 1.20                  | 10              |
| 694 | nucleoporin NUP53                                                            | 31982904         | 35         | 4               | 18                    | 10              |
| 695 | COP9 signalosome complex subunit 8 isoform 1                                 | 5729779          | 23         | 3               | 30                    | 10              |
| 696 | diablo homolog, mitochondrial isoform 1 precursor                            | 9845297          | 27         | 5               | 25                    | 10              |
| 697 | ubiquitin thioesterase OTUB2                                                 | 12962939         | 27         | 4               | 18                    | 10              |
| 698 | NADH dehydrogenase [ubiquinone] 1 alpha subcomplex subunit 2 isoform 1       | 4505355          | 11         | 4               | 41                    | 10              |
| 699 | ADP-ribosylation factor-like protein 3                                       | 4757774          | 20         | 5               | 45                    | 10              |
| 700 | brain protein 44                                                             | 219521872        | 14         | 4               | 39                    | 10              |
| 701 | midkine precursor                                                            | 4505135          | 16         | 4               | 23                    | 9               |
| 702 | F-actin-capping protein subunit beta isoform 1                               | 4826659          | 31         | 4               | 13                    | 9               |
| 703 | 40S ribosomal protein S3                                                     | 15718687         | 27         | 6               | 35                    | 9               |
| 704 | annexin A7 isoform 1                                                         | 4502111          | 50         | 4               | 9.20                  | 9               |
| 705 | ras-related C3 botulinum toxin substrate 1 isoform Rac1b                     | 9845509          | 23         | 5               | 21                    | 9               |
| 706 | adenylate kinase domain-containing protein 1 isoform 1                       | 237858799        | 221        | 7               | 4.30                  | 9               |
| 707 | cystatin-B                                                                   | 4503117          | 11         | 2               | 34                    | 9               |
| 708 | spondin-2 precursor                                                          | 6912682          | 36         | 3               | 7.60                  | 9               |
| 709 | tropomyosin alpha-3 chain isoform 2                                          | 24119203         | 29         | 4               | 20                    | 9               |
| 710 | ran-specific GTPase-activating protein                                       | 4506407          | 23         | 2               | 10.00                 | 9               |
| 711 | ATP synthase subunit delta, mitochondrial precursor                          | 50345991         | 17         | 4               | 39                    | 9               |
| 712 | vitronectin precursor                                                        | 88853069         | 54         | 3               | 8.60                  | 9               |
| 713 | 40S ribosomal protein S15a                                                   | 71772415         | 15         | 4               | 32                    | 9               |
| 714 | bifunctional ATP-dependent dihydroxyacetone kinase/FAD-AMP lyase (cyclizing) | 20149621         | 59         | 4               | 11                    | 9               |
| 715 | pro-cathepsin H preproprotein                                                | 23110955         | 37         | 2               | 8.40                  | 9               |
| 716 | destrin isoform a                                                            | 5802966          | 19         | 2               | 17                    | 9               |
| 717 | uncharacterized protein C9orf171                                             | 46409466         | 36         | 5               | 16                    | 9               |
| 718 | protein TSC21                                                                | 22749357         | 21         | 2               | 13                    | 9               |

*Contd...*

Supplementary Table 2: Contd...

| No. | Protein                                                                              | Gel 1            |            |                 |                       |                 |
|-----|--------------------------------------------------------------------------------------|------------------|------------|-----------------|-----------------------|-----------------|
|     |                                                                                      | Accession number | Mass (kDa) | Peptides number | Sequence coverage (%) | Spectral counts |
| 719 | aflatoxin B1 aldehyde reductase member 2                                             | 41327764         | 40         | 4               | 16                    | 9               |
| 720 | ubiquitin carboxyl-terminal hydrolase 7                                              | 150378533        | 128        | 6               | 6.70                  | 9               |
| 721 | peptidyl-prolyl cis-trans isomerase F, mitochondrial precursor                       | 5031987          | 22         | 4               | 35                    | 9               |
| 722 | 3-mercaptopyruvate sulfurtransferase isoform 2                                       | 61835204         | 33         | 3               | 19                    | 9               |
| 723 | WD repeat-containing protein 65 isoform a                                            | 345199335        | 149        | 8               | 7.10                  | 9               |
| 724 | 60S ribosomal protein L12                                                            | 4506597          | 18         | 3               | 25                    | 9               |
| 725 | prenylated Rab acceptor protein 1                                                    | 222144309        | 21         | 3               | 18                    | 9               |
| 726 | translocon-associated protein subunit delta isoform 3 precursor                      | 325301078        | 20         | 3               | 24                    | 9               |
| 727 | dnaJ homolog subfamily B member 6 isoform b                                          | 4885495          | 27         | 2               | 12                    | 9               |
| 728 | beta-defensin 126 preproprotein                                                      | 13624333         | 12         | 2               | 8.10                  | 9               |
| 729 | leucine-rich repeat-containing protein 23 isoform a                                  | 42542396         | 40         | 4               | 19                    | 9               |
| 730 | brain protein 44-like protein 2                                                      | 306922396        | 15         | 3               | 34                    | 9               |
| 731 | apolipoprotein O precursor                                                           | 13129148         | 22         | 3               | 19                    | 9               |
| 732 | tenascin precursor                                                                   | 153946395        | 241        | 6               | 3.70                  | 9               |
| 733 | kita-kyushu lung cancer antigen 1                                                    | 63025190         | 13         | 2               | 19                    | 9               |
| 734 | peptidyl-prolyl cis-trans isomerase FKBP2 precursor                                  | 17149842         | 16         | 5               | 32                    | 9               |
| 735 | ubiquitin carboxyl-terminal hydrolase 14 isoform b                                   | 82880645         | 52         | 4               | 7.00                  | 8               |
| 736 | ferritin heavy chain                                                                 | 56682959         | 21         | 3               | 23                    | 8               |
| 737 | alcohol dehydrogenase class-3                                                        | 71565154         | 40         | 4               | 11                    | 8               |
| 738 | inositol monophosphatase 1 isoform 2                                                 | 221625487        | 37         | 3               | 13                    | 8               |
| 739 | calpain-1 catalytic subunit                                                          | 311893363        | 82         | 5               | 8.00                  | 8               |
| 740 | lysosome membrane protein 2 isoform 1 precursor                                      | 5031631          | 54         | 4               | 14                    | 8               |
| 741 | apolipoprotein D precursor                                                           | 4502163          | 21         | 4               | 21                    | 8               |
| 742 | 26S proteasome non-ATPase regulatory subunit 6                                       | 7661914          | 46         | 4               | 13                    | 8               |
| 743 | glycerophosphodiester phosphodiesterase 1                                            | 7706617          | 38         | 4               | 19                    | 8               |
| 744 | NADH dehydrogenase [ubiquinone] 1 alpha subcomplex subunit 8                         | 7657369          | 20         | 3               | 23                    | 8               |
| 745 | ADP-ribosyl cyclase 1                                                                | 38454326         | 34         | 2               | 8.70                  | 8               |
| 746 | importin-4                                                                           | 62460637         | 119        | 5               | 5.80                  | 8               |
| 747 | 60S ribosomal protein L7a                                                            | 4506661          | 30         | 3               | 15                    | 8               |
| 748 | UTP--glucose-1-phosphate uridylyltransferase isoform b                               | 48255968         | 56         | 4               | 10                    | 8               |
| 749 | dnaJ homolog subfamily C member 3 precursor                                          | 5453980          | 58         | 5               | 18                    | 8               |
| 750 | puromycin-sensitive aminopeptidase                                                   | 158937236        | 103        | 4               | 2.70                  | 8               |
| 751 | 60S ribosomal protein L18                                                            | 4506607          | 22         | 3               | 13                    | 8               |
| 752 | cytochrome c oxidase subunit 7A2, mitochondrial precursor                            | 262118227        | 13         | 3               | 22                    | 8               |
| 753 | nuclear pore complex protein Nup205                                                  | 57634534         | 228        | 6               | 3.60                  | 8               |
| 754 | cytochrome b5 type B                                                                 | 83921614         | 17         | 3               | 17                    | 8               |
| 755 | protein FAM71A                                                                       | 282721094        | 63         | 4               | 8.40                  | 8               |
| 756 | dynein light chain 1, axonemal isoform 1                                             | 164607156        | 22         | 4               | 19                    | 8               |
| 757 | lipase member I                                                                      | 39752679         | 55         | 3               | 6.70                  | 8               |
| 758 | left-right determination factor 1 preproprotein                                      | 10337603         | 41         | 3               | 11                    | 8               |
| 759 | 3-oxoacyl-[acyl-carrier-protein] synthase, mitochondrial isoform 1                   | 8923559          | 49         | 3               | 15                    | 8               |
| 760 | glutathione S-transferase omega-2 isoform 1                                          | 38016131         | 28         | 5               | 22                    | 8               |
| 761 | myotrophin                                                                           | 21956645         | 13         | 3               | 43                    | 8               |
| 762 | thioredoxin domain-containing protein 17                                             | 14249348         | 14         | 3               | 27                    | 8               |
| 763 | ras-related protein Rab-6A isoform b                                                 | 38679888         | 24         | 3               | 16                    | 8               |
| 764 | nucleosome assembly protein 1-like 1                                                 | 4758756          | 45         | 3               | 13                    | 8               |
| 765 | actin-like protein 9                                                                 | 194097462        | 46         | 4               | 13                    | 8               |
| 766 | protein arginine N-methyltransferase 5 isoform a                                     | 20070220         | 73         | 5               | 9.70                  | 8               |
| 767 | deoxyuridine 5'-triphosphate nucleotidohydrolase, mitochondrial isoform 1 precursor  | 70906441         | 27         | 4               | 21                    | 8               |
| 768 | Sjogren syndrome nuclear autoantigen 1                                               | 189571687        | 14         | 4               | 27                    | 8               |
| 769 | NADH dehydrogenase [ubiquinone] 1 beta subcomplex subunit 8, mitochondrial precursor | 4826854          | 22         | 3               | 21                    | 8               |
| 770 | voltage-dependent calcium channel subunit alpha-2/delta-2 isoform c                  | 291290994        | 130        | 6               | 6.80                  | 8               |
| 771 | V-type proton ATPase subunit B, brain isoform                                        | 19913428         | 57         | 4               | 14                    | 8               |
| 772 | transcriptional activator protein Pur-alpha                                          | 5032007          | 35         | 3               | 15                    | 8               |

Contd...

## Supplementary Table 2: Contd...

| No. | Protein                                                                                   | Gel 1            |            |                 |                       |                 |
|-----|-------------------------------------------------------------------------------------------|------------------|------------|-----------------|-----------------------|-----------------|
|     |                                                                                           | Accession number | Mass (kDa) | Peptides number | Sequence coverage (%) | Spectral counts |
| 773 | peptidase inhibitor 15 preproprotein                                                      | 7705676          | 29         | 4               | 19                    | 8               |
| 774 | integral membrane protein 2B                                                              | 11527402         | 30         | 3               | 21                    | 8               |
| 775 | bovine seminal plasma protein homolog 1 precursor                                         | 190358548        | 16         | 3               | 25                    | 8               |
| 776 | succinyl-CoA ligase [ADP/GDP-forming] subunit alpha, mitochondrial                        | 109452591        | 36         | 2               | 8.70                  | 8               |
| 777 | isovaleryl-CoA dehydrogenase, mitochondrial isoform 1 precursor                           | 226958412        | 47         | 3               | 16                    | 8               |
| 778 | splicing factor 3A subunit 3                                                              | 5803167          | 59         | 2               | 4.40                  | 8               |
| 779 | outer dense fiber protein 3B                                                              | 116292180        | 27         | 3               | 12                    | 8               |
| 780 | ATP-citrate synthase isoform 1                                                            | 38569421         | 121        | 6               | 6.40                  | 7               |
| 781 | UPF0577 protein KIAA1324 precursor                                                        | 38569482         | 111        | 4               | 3.80                  | 7               |
| 782 | homogentisate 1,2-dioxygenase                                                             | 115527117        | 50         | 4               | 16                    | 7               |
| 783 | proactivator polypeptide isoform a preproprotein                                          | 11386147         | 58         | 3               | 5.30                  | 7               |
| 784 | nucleophosmin isoform 1                                                                   | 10835063         | 33         | 3               | 24                    | 7               |
| 785 | gamma-glutamyl hydrolase precursor                                                        | 4503987          | 36         | 3               | 17                    | 7               |
| 786 | transmembrane emp24 domain-containing protein 2 precursor                                 | 5803149          | 23         | 2               | 18                    | 7               |
| 787 | fumarylacetoacetate hydrolase domain-containing protein 2B                                | 40786394         | 35         | 3               | 21                    | 7               |
| 788 | ferritin light chain                                                                      | 20149498         | 20         | 3               | 23                    | 7               |
| 789 | 60S ribosomal protein L14                                                                 | 78000181         | 23         | 3               | 16                    | 7               |
| 790 | proteasome activator complex subunit 4                                                    | 163644283        | 211        | 6               | 3.50                  | 7               |
| 791 | NADH-cytochrome b5 reductase 3 isoform 2                                                  | 193794826        | 32         | 3               | 17                    | 7               |
| 792 | nucleosome assembly protein 1-like 4                                                      | 5174613          | 43         | 3               | 9.60                  | 7               |
| 793 | transketolase-like protein 1 isoform b                                                    | 225637461        | 65         | 3               | 6.40                  | 7               |
| 794 | UPF0740 protein C1orf192                                                                  | 63029930         | 19         | 4               | 27                    | 7               |
| 795 | ATP synthase subunit epsilon, mitochondrial                                               | 5901896          | 6          | 3               | 45                    | 7               |
| 796 | sperm-associated antigen 16 protein isoform 1                                             | 70909324         | 71         | 5               | 10                    | 7               |
| 797 | dipeptidase 1 precursor                                                                   | 4758190          | 46         | 3               | 13                    | 7               |
| 798 | EF-hand calcium-binding domain-containing protein 1 isoform a                             | 13375787         | 24         | 3               | 23                    | 7               |
| 799 | BAG family molecular chaperone regulator 5 isoform b                                      | 6631077          | 51         | 4               | 16                    | 7               |
| 800 | HD domain-containing protein 2                                                            | 116875826        | 23         | 3               | 24                    | 7               |
| 801 | dihydropteridine reductase                                                                | 208973246        | 26         | 3               | 23                    | 7               |
| 802 | heterogeneous nuclear ribonucleoprotein K isoform b                                       | 14165435         | 51         | 4               | 13                    | 7               |
| 803 | SPARC-related modular calcium-binding protein 2 isoform 1 precursor                       | 24308277         | 51         | 3               | 12                    | 7               |
| 804 | synaptogyrin-2                                                                            | 4759202          | 25         | 3               | 13                    | 7               |
| 805 | glycyl-tRNA synthetase precursor                                                          | 116805340        | 83         | 4               | 8.40                  | 7               |
| 806 | BAG family molecular chaperone regulator 2                                                | 4757834          | 24         | 3               | 20                    | 7               |
| 807 | protein FAM162A                                                                           | 49355721         | 17         | 2               | 20                    | 7               |
| 808 | PREDICTED: hypothetical protein LOC728597                                                 | 341914388        | 72         | 4               | 6.70                  | 7               |
| 809 | aminoacyl tRNA synthase complex-interacting multifunctional protein 1 isoform b precursor | 215490011        | 37         | 3               | 17                    | 7               |
| 810 | protein DPCD                                                                              | 39930355         | 23         | 3               | 15                    | 7               |
| 811 | transmembrane protein 205                                                                 | 63055043         | 21         | 2               | 16                    | 7               |
| 812 | thiosulfate sulfurtransferase/rhodanese-like domain-containing protein 1 isoform 1        | 163965377        | 13         | 3               | 21                    | 7               |
| 813 | ethanolamine-phosphate cytidyltransferase isoform 1                                       | 296841136        | 46         | 3               | 14                    | 7               |
| 814 | ubiquitin-conjugating enzyme E2 L3                                                        | 4507789          | 18         | 3               | 30                    | 7               |
| 815 | desmoglein-1 preproprotein                                                                | 119703744        | 114        | 6               | 9.70                  | 7               |
| 816 | mannosyl-oligosaccharide glucosidase isoform 1                                            | 149999606        | 92         | 3               | 4.70                  | 7               |
| 817 | uncharacterized protein C9orf135                                                          | 58219541         | 26         | 3               | 21                    | 7               |
| 818 | high mobility group protein B2                                                            | 194688133        | 24         | 3               | 19                    | 7               |
| 819 | cysteine desulfurase, mitochondrial isoform a                                             | 32307132         | 50         | 4               | 14                    | 7               |
| 820 | ATP synthase-coupling factor 6, mitochondrial isoform a precursor                         | 18644883         | 13         | 3               | 46                    | 7               |
| 821 | nucleobindin-1 precursor                                                                  | 20070228         | 54         | 3               | 12                    | 7               |
| 822 | mitochondrial fission 1 protein                                                           | 151108473        | 17         | 3               | 26                    | 7               |
| 823 | azurocidin preproprotein                                                                  | 11342670         | 27         | 2               | 9.60                  | 6               |
| 824 | calicin                                                                                   | 169636428        | 67         | 3               | 6.10                  | 6               |
| 825 | exportin-2                                                                                | 29029559         | 110        | 3               | 4.60                  | 6               |
| 826 | 60S acidic ribosomal protein P1 isoform 1                                                 | 4506669          | 12         | 2               | 57                    | 6               |

Contd...



Supplementary Table 2: Contd...

| No. | Gel 1                                                                           |                  |            |                 |                       |                 |
|-----|---------------------------------------------------------------------------------|------------------|------------|-----------------|-----------------------|-----------------|
|     | Protein                                                                         | Accession number | Mass (kDa) | Peptides number | Sequence coverage (%) | Spectral counts |
| 827 | cytochrome b5 isoform 1                                                         | 41281768         | 15         | 3               | 36                    | 6               |
| 828 | phosphate carrier protein, mitochondrial isoform b precursor                    | 47132595         | 40         | 2               | 5.50                  | 6               |
| 829 | 60S ribosomal protein L11 isoform 1                                             | 15431290         | 20         | 2               | 13                    | 6               |
| 830 | beta-hexosaminidase subunit beta preproprotein                                  | 4504373          | 63         | 4               | 9.50                  | 6               |
| 831 | platelet-activating factor acetylhydrolase IB subunit beta isoform a            | 4505585          | 26         | 2               | 12                    | 6               |
| 832 | thioredoxin domain-containing protein 2 isoform 2                               | 148727319        | 60         | 3               | 4.90                  | 6               |
| 833 | 60S ribosomal protein L7                                                        | 15431301         | 29         | 4               | 18                    | 6               |
| 834 | matrilin-2 isoform a precursor                                                  | 62548860         | 107        | 3               | 4.40                  | 6               |
| 835 | glyoxylate reductase/hydroxypyruvate reductase                                  | 6912396          | 36         | 3               | 15                    | 6               |
| 836 | 72 type IV collagenase isoform a preproprotein                                  | 11342666         | 74         | 2               | 5.00                  | 6               |
| 837 | antileukoproteinase precursor                                                   | 4507065          | 14         | 2               | 15                    | 6               |
| 838 | trafficking protein particle complex subunit 3                                  | 7656926          | 20         | 2               | 13                    | 6               |
| 839 | tripeptidyl-peptidase 1 preproprotein                                           | 5729770          | 61         | 4               | 14                    | 6               |
| 840 | transketolase-like protein 2                                                    | 133778974        | 68         | 2               | 5.60                  | 6               |
| 841 | dynein heavy chain 12, axonemal isoform 1                                       | 194440727        | 357        | 2               | 1.00                  | 6               |
| 842 | mitochondrial dicarboxylate carrier                                             | 20149598         | 31         | 4               | 19                    | 6               |
| 843 | biglycan preproprotein                                                          | 4502403          | 42         | 3               | 7.60                  | 6               |
| 844 | prostate and testis expressed protein 2 precursor                               | 47086459         | 13         | 2               | 27                    | 6               |
| 845 | chloride intracellular channel protein 4                                        | 7330335          | 29         | 3               | 13                    | 6               |
| 846 | protein CutA isoform 1                                                          | 62198241         | 21         | 2               | 21                    | 6               |
| 847 | prohibitin-2 isoform 2                                                          | 6005854          | 33         | 3               | 13                    | 6               |
| 848 | glutathione S-transferase Mu 1 isoform 1                                        | 23065544         | 26         | 2               | 14                    | 6               |
| 849 | tubulin polymerization-promoting protein family member 2                        | 226491350        | 19         | 3               | 32                    | 6               |
| 850 | probable inactive serine protease 37 isoform 1 precursor                        | 285394164        | 26         | 2               | 8.90                  | 6               |
| 851 | sperm-associated antigen 11B isoform A preproprotein                            | 7706551          | 11         | 2               | 19                    | 6               |
| 852 | putative peptidyl-tRNA hydrolase PTRHD1                                         | 61966781         | 16         | 3               | 25                    | 6               |
| 853 | ras-related protein Rab-5B isoform 1                                            | 354725902        | 24         | 2               | 18                    | 6               |
| 854 | lysosomal Pro-X carboxypeptidase isoform 1 preproprotein                        | 4826940          | 56         | 2               | 7.30                  | 6               |
| 855 | NADH dehydrogenase [ubiquinone] iron-sulfur protein 4, mitochondrial precursor  | 4505369          | 20         | 2               | 14                    | 6               |
| 856 | UPF0587 protein C1orf123                                                        | 8923541          | 18         | 2               | 25                    | 6               |
| 857 | syntaxin-12                                                                     | 28933465         | 32         | 3               | 14                    | 6               |
| 858 | 6-phosphogluconolactonase                                                       | 6912586          | 28         | 3               | 21                    | 6               |
| 859 | agouti-related protein precursor                                                | 4501995          | 14         | 2               | 14                    | 6               |
| 860 | major prion protein preproprotein                                               | 122056623        | 28         | 2               | 9.50                  | 6               |
| 861 | dolichyl-diphosphooligosaccharide--protein glycosyltransferase subunit DAD1     | 4503253          | 12         | 2               | 19                    | 6               |
| 862 | non-specific lipid-transfer protein isoform 1 proprotein                        | 19923233         | 59         | 2               | 3.50                  | 6               |
| 863 | V-type proton ATPase subunit d 1                                                | 19913432         | 40         | 2               | 6.80                  | 6               |
| 864 | transmembrane emp24 domain-containing protein 1 precursor                       | 5803040          | 25         | 2               | 11                    | 6               |
| 865 | ADP-ribosylation factor 6                                                       | 4502211          | 20         | 2               | 12                    | 6               |
| 866 | endoplasmic reticulum lectin 1 isoform 2 precursor                              | 188528696        | 52         | 4               | 19                    | 6               |
| 867 | alpha-galactosidase A precursor                                                 | 4504009          | 49         | 2               | 7.00                  | 6               |
| 868 | V-type proton ATPase subunit E 1 isoform a                                      | 4502317          | 26         | 2               | 12                    | 6               |
| 869 | uncharacterized protein C19orf18 precursor                                      | 22748999         | 24         | 2               | 9.80                  | 6               |
| 870 | ADP-ribosylation factor-like protein 8B                                         | 8922601          | 22         | 2               | 18                    | 6               |
| 871 | secretoglobin family 1D member 2 precursor                                      | 5729909          | 10         | 2               | 22                    | 6               |
| 872 | uncharacterized protein C22orf43                                                | 56118955         | 25         | 2               | 9.60                  | 6               |
| 873 | 60S ribosomal protein L31 isoform 3                                             | 153252132        | 14         | 2               | 19                    | 6               |
| 874 | iron-sulfur cluster assembly enzyme ISCU, mitochondrial isoform ISCU2 precursor | 56699456         | 18         | 2               | 10                    | 6               |
| 875 | 40S ribosomal protein S24 isoform a                                             | 14916501         | 15         | 2               | 21                    | 6               |
| 876 | retinoic acid receptor responder protein 1 isoform 2 precursor                  | 46255041         | 26         | 2               | 9.60                  | 6               |
| 877 | phenylalanyl-tRNA synthetase alpha chain                                        | 4758340          | 58         | 3               | 12                    | 6               |
| 878 | fibrinogen-like protein 1 precursor                                             | 42544189         | 36         | 2               | 7.40                  | 6               |
| 879 | titin isoform N2-A                                                              | 291045225        | 3713       | 3               | 0.06                  | 5               |
| 880 | glycerol-3-phosphate dehydrogenase 1-like protein                               | 24307999         | 38         | 2               | 6.00                  | 5               |

Contd...

**Supplementary Table 2: Contd...**

| No. | Protein                                                            | Gel 1            |            |                 |                       |                 |
|-----|--------------------------------------------------------------------|------------------|------------|-----------------|-----------------------|-----------------|
|     |                                                                    | Accession number | Mass (kDa) | Peptides number | Sequence coverage (%) | Spectral counts |
| 881 | complement decay-accelerating factor isoform 2 precursor           | 168693643        | 49         | 3               | 9.10                  | 5               |
| 882 | beta-microseminoprotein isoform a precursor                        | 4557036          | 13         | 3               | 18                    | 5               |
| 883 | cathepsin D preproprotein                                          | 4503143          | 45         | 3               | 12                    | 5               |
| 884 | CD63 antigen isoform A                                             | 4502679          | 26         | 2               | 5.00                  | 5               |
| 885 | cystatin-S precursor                                               | 4503109          | 16         | 3               | 28                    | 5               |
| 886 | lysosome-associated membrane glycoprotein 2 isoform C precursor    | 169790833        | 45         | 2               | 4.10                  | 5               |
| 887 | spectrin alpha chain, brain isoform 2                              | 154759259        | 285        | 3               | 1.90                  | 5               |
| 888 | phospholipase A1 member A isoform 2 precursor                      | 332688256        | 48         | 2               | 7.30                  | 5               |
| 889 | UPF0468 protein C16orf80                                           | 8392875          | 23         | 3               | 19                    | 5               |
| 890 | sperm-associated antigen 11B isoform D preproprotein               | 126131097        | 15         | 2               | 17                    | 5               |
| 891 | acyl-protein thioesterase 1                                        | 5453722          | 25         | 3               | 21                    | 5               |
| 892 | S-adenosylmethionine synthase isoform type-2                       | 5174529          | 44         | 2               | 6.60                  | 5               |
| 893 | filaggrin-2                                                        | 62122917         | 248        | 3               | 2.80                  | 5               |
| 894 | spermatogenesis-associated protein 19, mitochondrial precursor     | 28376652         | 19         | 3               | 26                    | 5               |
| 895 | thioredoxin-dependent peroxide reductase, mitochondrial isoform b  | 32483377         | 26         | 3               | 16                    | 5               |
| 896 | zona pellucida-binding protein 2 isoform 1 precursor               | 84875535         | 36         | 2               | 7.90                  | 5               |
| 897 | cytosolic 5'-nucleotidase 1B isoform 4                             | 312283642        | 71         | 2               | 3.00                  | 5               |
| 898 | renin receptor precursor                                           | 15011918         | 39         | 3               | 13                    | 5               |
| 899 | sialidase-1 precursor                                              | 4557791          | 45         | 2               | 12                    | 5               |
| 900 | 60S ribosomal protein L13a                                         | 6912634          | 24         | 2               | 10                    | 5               |
| 901 | 15 selenoprotein isoform 1 precursor                               | 42741648         | 18         | 3               | 17                    | 5               |
| 902 | proteasome activator complex subunit 2                             | 30410792         | 27         | 2               | 13                    | 5               |
| 903 | guanine nucleotide-binding protein subunit beta-2-like 1           | 5174447          | 35         | 2               | 8.50                  | 5               |
| 904 | vesicle-trafficking protein SEC22b precursor                       | 94429050         | 25         | 2               | 11                    | 5               |
| 905 | coiled-coil-helix-coiled-coil-helix domain-containing protein 6    | 14150134         | 26         | 3               | 23                    | 5               |
| 906 | S-phase kinase-associated protein 1 isoform b                      | 25777713         | 19         | 3               | 18                    | 5               |
| 907 | metaxin-2                                                          | 5729937          | 30         | 2               | 8.00                  | 5               |
| 908 | prostate and testis expressed protein 4                            | 221554530        | 11         | 3               | 30                    | 5               |
| 909 | secreted frizzled-related protein 1 precursor                      | 56117838         | 35         | 3               | 12                    | 5               |
| 910 | protein EAN57 isoform 1                                            | 255759947        | 31         | 2               | 6.80                  | 5               |
| 911 | minor histocompatibility antigen H13 isoform 1                     | 23308607         | 41         | 2               | 9.50                  | 5               |
| 912 | ATP synthase subunit s, mitochondrial isoform a precursor [Homo    | 51558774         | 25         | 3               | 13                    | 5               |
| 913 | coiled-coil domain-containing protein 151                          | 117553613        | 69         | 5               | 11                    | 5               |
| 914 | glypican-3 isoform 1 precursor                                     | 257471006        | 68         | 3               | 5.30                  | 5               |
| 915 | NADH dehydrogenase [ubiquinone] iron-sulfur protein 5              | 4758790          | 13         | 2               | 18                    | 5               |
| 916 | thioredoxin domain-containing protein 12 precursor                 | 7705696          | 19         | 2               | 14                    | 5               |
| 917 | mitochondrial 2-oxoglutarate/malate carrier protein isoform 1      | 21361114         | 34         | 3               | 13                    | 5               |
| 918 | protein FAM3B isoform a precursor                                  | 46255030         | 26         | 2               | 8.10                  | 5               |
| 919 | astrocytic phosphoprotein PEA-15                                   | 4505705          | 15         | 2               | 17                    | 5               |
| 920 | coiled-coil domain-containing protein 42A isoform 1                | 226494053        | 38         | 2               | 11                    | 5               |
| 921 | uncharacterized protein C7orf72                                    | 332634960        | 50         | 2               | 9.80                  | 5               |
| 922 | cornulin                                                           | 7706635          | 54         | 2               | 5.10                  | 5               |
| 923 | glutaredoxin-3                                                     | 95113651         | 37         | 3               | 19                    | 5               |
| 924 | arrestin domain-containing protein 5                               | 122937478        | 38         | 3               | 11                    | 5               |
| 925 | mimitin, mitochondrial                                             | 29789409         | 20         | 2               | 24                    | 5               |
| 926 | protein-tyrosine phosphatase mitochondrial 1 isoform 1             | 148224884        | 23         | 3               | 21                    | 5               |
| 927 | DAZ-associated protein 1 isoform b                                 | 25470886         | 43         | 3               | 14                    | 5               |
| 928 | 60S ribosomal protein L26                                          | 4506621          | 17         | 3               | 21                    | 5               |
| 929 | coiled-coil domain-containing protein 90B, mitochondrial precursor | 20149663         | 30         | 2               | 15                    | 5               |
| 930 | maleylacetoacetate isomerase isoform 1                             | 22202624         | 24         | 2               | 10                    | 5               |
| 931 | uncharacterized protein C2orf61 isoform 1                          | 254675143        | 28         | 2               | 13                    | 5               |
| 932 | sphingomyelin phosphodiesterase 4 isoform 2                        | 102467481        | 98         | 3               | 4.30                  | 5               |
| 933 | gelsolin isoform a precursor                                       | 4504165          | 86         | 2               | 3.60                  | 4               |
| 934 | UPF0556 protein C19orf10 precursor                                 | 33457348         | 19         | 2               | 12                    | 4               |
| 935 | profilin-2 isoform a                                               | 16753215         | 15         | 2               | 21                    | 4               |

Contd...

Supplementary Table 2: Contd...

| No. | Protein                                                                           | Accession number | Mass (kDa) | Peptides number | Sequence coverage (%) | Spectral counts |
|-----|-----------------------------------------------------------------------------------|------------------|------------|-----------------|-----------------------|-----------------|
| 936 | elongation factor 1-beta                                                          | 4503477          | 25         | 2               | 24                    | 4               |
| 937 | ras-related protein Rap-1b isoform 1 precursor                                    | 7661678          | 21         | 2               | 13                    | 4               |
| 938 | sarcoplasmic/endoplasmic reticulum calcium ATPase 2 isoform b                     | 24638454         | 115        | 3               | 3.90                  | 4               |
| 939 | dynactin subunit 3 isoform 1                                                      | 6005745          | 21         | 2               | 9.10                  | 4               |
| 940 | carnitine O-palmitoyltransferase 1, muscle isoform isoform a                      | 223468678        | 88         | 4               | 3.60                  | 4               |
| 941 | acid sphingomyelinase-like phosphodiesterase 3b isoform 1 precursor               | 57242798         | 51         | 2               | 5.70                  | 4               |
| 942 | izumo sperm-egg fusion protein 1 precursor                                        | 194097475        | 39         | 2               | 9.10                  | 4               |
| 943 | 14 phosphohistidine phosphatase isoform 3                                         | 24475861         | 14         | 2               | 26                    | 4               |
| 944 | fatty-acid amide hydrolase 1                                                      | 166795287        | 63         | 2               | 7.80                  | 4               |
| 945 | aquaporin-5                                                                       | 4502183          | 28         | 2               | 9.80                  | 4               |
| 946 | protein NDRG3 isoform a                                                           | 14165266         | 41         | 3               | 15                    | 4               |
| 947 | low molecular weight phosphotyrosine protein phosphatase isoform c                | 4757714          | 18         | 2               | 17                    | 4               |
| 948 | nucleoside diphosphate kinase 7 isoform a                                         | 7019465          | 42         | 2               | 6.60                  | 4               |
| 949 | protein OS-9 isoform 1 precursor                                                  | 5803109          | 76         | 2               | 4.90                  | 4               |
| 950 | protamine-2                                                                       | 68989267         | 13         | 2               | 27                    | 4               |
| 951 | calcium-binding mitochondrial carrier protein Aralar1                             | 21361103         | 75         | 2               | 3.70                  | 4               |
| 952 | transducin beta-like protein 2 precursor                                          | 7549793          | 50         | 2               | 6.90                  | 4               |
| 953 | dickkopf-like protein 1 isoform 2 precursor                                       | 308818218        | 24         | 3               | 15                    | 4               |
| 954 | thioredoxin-like protein 1                                                        | 4759274          | 32         | 2               | 10                    | 4               |
| 955 | growth hormone-inducible transmembrane protein                                    | 118200356        | 37         | 2               | 6.40                  | 4               |
| 956 | thiamine-triphosphatase                                                           | 13236577         | 26         | 2               | 12                    | 4               |
| 957 | beta-defensin 105 precursor                                                       | 103485141        | 9          | 2               | 27                    | 4               |
| 958 | ubiquitin-conjugating enzyme E2 N                                                 | 4507793          | 17         | 2               | 17                    | 4               |
| 959 | septin-4 isoform 3                                                                | 17986247         | 53         | 2               | 5.00                  | 4               |
| 960 | eukaryotic translation initiation factor 3                                        | 23397429         | 43         | 2               | 13                    | 4               |
| 961 | actin-related protein 2/3 complex subunit 4 isoform c                             | 311771647        | 22         | 2               | 18                    | 4               |
| 962 | electron transfer flavoprotein-ubiquinone oxidoreductase, mitochondrial precursor | 119703746        | 68         | 2               | 5.20                  | 4               |
| 963 | calcium-regulated heat stable protein 1                                           | 109715858        | 16         | 2               | 18                    | 4               |
| 964 | glutaminyl-peptide cyclotransferase precursor                                     | 6912618          | 41         | 2               | 13                    | 4               |
| 965 | SPRY domain-containing protein 7 isoform 1                                        | 20531765         | 22         | 2               | 13                    | 4               |
| 966 | coiled-coil domain-containing protein 164                                         | 217416374        | 87         | 4               | 6.20                  | 4               |
| 967 | uncharacterized protein C19orf71                                                  | 207442677        | 24         | 2               | 14                    | 4               |
| 968 | UPF0573 protein C2orf70                                                           | 157502167        | 23         | 2               | 17                    | 4               |
| 969 | tissue alpha-L-fucosidase precursor                                               | 119360348        | 54         | 2               | 6.00                  | 4               |
| 970 | 4F2 cell-surface antigen heavy chain isoform c                                    | 65506891         | 68         | 2               | 4.10                  | 4               |
| 971 | protein transport protein Sec61 subunit beta                                      | 5803165          | 10         | 2               | 26                    | 4               |
| 972 | rhabdoid tumor deletion region protein 1                                          | 7657530          | 39         | 3               | 16                    | 4               |
| 973 | serine/threonine-protein phosphatase 6 catalytic subunit isoform a                | 183603929        | 39         | 2               | 8.20                  | 4               |
| 974 | procollagen-lysine, 2-oxoglutarate 5-dioxygenase 1 precursor                      | 32307144         | 84         | 2               | 3.20                  | 4               |
| 975 | ubiquitin-conjugating enzyme E2 variant 1 isoform d                               | 73765546         | 16         | 2               | 14                    | 4               |
| 976 | intraflagellar transport protein 27 homolog isoform 2                             | 6857824          | 20         | 2               | 13                    | 4               |
| 977 | prefoldin subunit 2                                                               | 12408675         | 17         | 2               | 17                    | 4               |
| 978 | COP9 signalosome complex subunit 7b                                               | 12232385         | 30         | 2               | 9.10                  | 4               |
| 979 | eukaryotic translation initiation factor 3 subunit B                              | 33239445         | 92         | 3               | 4.40                  | 4               |
| 980 | carboxylesterase 5A isoform 1 precursor                                           | 219521907        | 64         | 2               | 5.40                  | 4               |
| 981 | protein lin-7 homolog A                                                           | 4759306          | 26         | 4               | 20                    | 4               |
| 982 | heat shock protein beta-11                                                        | 118343647        | 16         | 2               | 28                    | 4               |
| 983 | abhydrolase domain-containing protein 16A isoform a                               | 15100151         | 63         | 2               | 5.40                  | 4               |
| 984 | tumor protein p53-inducible protein 11                                            | 33695117         | 21         | 2               | 13                    | 4               |
| 985 | synaptosomal-associated protein 29                                                | 4759154          | 29         | 2               | 8.50                  | 4               |
| 986 | cob (I) yrinic acid a, c-diamide adenosyltransferase, mitochondrial precursor     | 16418349         | 27         | 2               | 10                    | 4               |
| 987 | selenoprotein P isoform 2                                                         | 148277022        | 46         | 2               | 7.80                  | 4               |
| 988 | inactive serine protease 54 precursor                                             | 122937420        | 44         | 2               | 9.40                  | 4               |
| 989 | 60S ribosomal protein L13 isoform 1                                               | 15431295         | 24         | 2               | 9.50                  | 3               |
| 990 | ubiquitin carboxyl-terminal hydrolase 5 isoform 2                                 | 148727247        | 93         | 2               | 4.60                  | 3               |

Contd...

Supplementary Table 2: Contd...

| No.  | Protein                                                                      | Accession number | Mass (kDa) | Peptides number | Sequence coverage (%) | Spectral counts |
|------|------------------------------------------------------------------------------|------------------|------------|-----------------|-----------------------|-----------------|
| 991  | cysteine-rich secretory protein 2 precursor                                  | 215490018        | 27         | 2               | 4.90                  | 3               |
| 992  | 40S ribosomal protein S11                                                    | 4506681          | 18         | 2               | 9.50                  | 3               |
| 993  | eukaryotic translation initiation factor 3 subunit A                         | 4503509          | 167        | 3               | 2.30                  | 3               |
| 994  | endoplasmic reticulum-Golgi intermediate compartment protein 1               | 72534712         | 33         | 3               | 17                    | 3               |
| 995  | retinol dehydrogenase 11 isoform 1 precursor                                 | 166795268        | 35         | 2               | 7.90                  | 3               |
| 996  | 60S ribosomal protein L30                                                    | 4506631          | 13         | 2               | 24                    | 3               |
| 997  | sperm flagellar protein 2 isoform 1                                          | 145699133        | 210        | 2               | 1.20                  | 3               |
| 998  | nicotinamide phosphoribosyltransferase precursor                             | 5031977          | 56         | 2               | 10                    | 3               |
| 999  | retinal dehydrogenase 1                                                      | 21361176         | 55         | 2               | 4.40                  | 3               |
| 1000 | sulfhydryl oxidase 1 isoform a precursor                                     | 13325075         | 83         | 3               | 4.70                  | 3               |
| 1001 | 60S ribosomal protein L23                                                    | 4506605          | 15         | 2               | 16                    | 3               |
| 1002 | dynein intermediate chain 1, axonemal                                        | 6912338          | 79         | 2               | 5.90                  | 3               |
| 1003 | S-formylglutathione hydrolase                                                | 33413400         | 31         | 2               | 16                    | 3               |
| 1004 | eukaryotic translation initiation factor 6 isoform a                         | 4504771          | 27         | 2               | 13                    | 3               |
| 1005 | bifunctional purine biosynthesis protein PURH                                | 20127454         | 65         | 2               | 7.10                  | 3               |
| 1006 | protein BRICK1                                                               | 27544939         | 9          | 2               | 28                    | 3               |
| 1007 | 60S ribosomal protein L22 proprotein                                         | 4506613          | 15         | 2               | 19                    | 3               |
| 1008 | dynein intermediate chain 2, axonemal isoform 1                              | 217416452        | 69         | 2               | 3.80                  | 3               |
| 1009 | prostaglandin E synthase 3                                                   | 23308579         | 19         | 2               | 20                    | 3               |
| 1010 | spermatid-associated protein                                                 | 22749425         | 52         | 2               | 6.90                  | 3               |
| 1011 | cell cycle control protein 50A isoform 1                                     | 8922720          | 41         | 2               | 5.80                  | 3               |
| 1012 | neuropilin-1 isoform a precursor                                             | 182508169        | 103        | 3               | 5.60                  | 3               |
| 1013 | DNA damage-binding protein 1                                                 | 148529014        | 127        | 2               | 2.50                  | 3               |
| 1014 | glutaminyl-tRNA synthetase                                                   | 4826960          | 88         | 2               | 3.10                  | 3               |
| 1015 | solute carrier family 2, facilitated glucose transporter member 5 isoform 1  | 4507013          | 55         | 2               | 6.40                  | 3               |
| 1016 | 26S proteasome non-ATPase regulatory subunit 5                               | 4826952          | 56         | 2               | 5.60                  | 3               |
| 1017 | nodal modulator 3 precursor                                                  | 51944969         | 134        | 2               | 2.00                  | 3               |
| 1018 | methylosome protein 50                                                       | 13129110         | 37         | 3               | 11                    | 3               |
| 1019 | uncharacterized protein C2orf77                                              | 146260271        | 66         | 2               | 3.80                  | 3               |
| 1020 | cytochrome b5 domain-containing protein 1                                    | 40255060         | 27         | 3               | 21                    | 3               |
| 1021 | uncharacterized protein C2orf74 isoform 1                                    | 221139892        | 22         | 2               | 11                    | 3               |
| 1022 | COP9 signalosome complex subunit 7a                                          | 7705330          | 30         | 2               | 8.70                  | 3               |
| 1023 | centrin-1                                                                    | 4757974          | 20         | 3               | 19                    | 3               |
| 1024 | grpE protein homolog 1, mitochondrial precursor                              | 24308295         | 24         | 2               | 10                    | 3               |
| 1025 | cysteine--tRNA ligase, cytoplasmic isoform c                                 | 62240992         | 95         | 2               | 3.20                  | 3               |
| 1026 | RIB43A-like with coiled-coils protein 2                                      | 241666448        | 45         | 3               | 11                    | 3               |
| 1027 | uncharacterized protein LOC145788                                            | 311771669        | 14         | 2               | 27                    | 3               |
| 1028 | mitochondrial import receptor subunit TOM40 homolog                          | 5174723          | 38         | 2               | 16                    | 3               |
| 1029 | polypeptide N-acetylgalactosaminyltransferase 3                              | 153266878        | 73         | 2               | 4.40                  | 3               |
| 1030 | protein disulfide-isomerase-like protein of the testis precursor             | 28372543         | 67         | 3               | 6.30                  | 3               |
| 1031 | tetraspanin-16 isoform 1                                                     | 6912726          | 26         | 2               | 8.20                  | 3               |
| 1032 | peptidyl-prolyl cis-trans isomerase-like 6 isoform 1 [Homo                   | 27735045         | 35         | 2               | 15                    | 3               |
| 1033 | GTP: AMP phosphotransferase AK3, mitochondrial isoform a [Homo               | 19923437         | 26         | 2               | 8.40                  | 3               |
| 1034 | ADP-ribosylation factor-like protein 1                                       | 4502227          | 20         | 2               | 15                    | 3               |
| 1035 | mitochondrial-processing peptidase subunit alpha isoform 1                   | 24308013         | 58         | 2               | 7.20                  | 3               |
| 1036 | ectonucleotide pyrophosphatase/phosphodiesterase family member 3             | 111160296        | 100        | 2               | 4.10                  | 2               |
| 1037 | cytoskeleton-associated protein 4                                            | 19920317         | 66         | 2               | 4.20                  | 2               |
| 1038 | 60S ribosomal protein L5                                                     | 14591909         | 34         | 2               | 11                    | 2               |
| 1039 | membrane cofactor protein isoform 4 precursor                                | 24432108         | 43         | 2               | 7.30                  | 2               |
| 1040 | PITH domain-containing protein 1                                             | 21361837         | 24         | 2               | 13                    | 2               |
| 1041 | UMP-CMP kinase isoform a                                                     | 7706497          | 26         | 2               | 9.20                  | 2               |
| 1042 | NADPH--cytochrome P450 reductase                                             | 127139033        | 77         | 2               | 4.90%                 | 2               |
| 1043 | arylsulfatase A isoform a precursor                                          | 313569791        | 54         | 2               | 6.10%                 | 2               |
| 1044 | dehydrogenase/reductase SDR family member 7 precursor                        | 7706318          | 38         | 2               | 9.70%                 | 2               |
| 1045 | disintegrin and metalloproteinase domain-containing protein 29 preproprotein | 73765552         | 93         | 2               | 2.90%                 | 2               |

Contd...

**Supplementary Table 2: Contd...**

| <i>No.</i> | <i>Protein</i>                                                        | <i>Accession number</i> | <i>Mass (kDa)</i> | <i>Peptides number</i> | <i>Sequence coverage (%)</i> | <i>Spectral counts</i> |
|------------|-----------------------------------------------------------------------|-------------------------|-------------------|------------------------|------------------------------|------------------------|
| 1046       | aminoacyl tRNA synthase complex-interacting multifunctional protein 2 | 11125770                | 35                | 2                      | 11%                          | 2                      |
| 1047       | growth arrest-specific protein 8                                      | 4503917                 | 56                | 2                      | 3.80%                        | 2                      |
| 1048       | uncharacterized protein LOC100130705                                  | 304376316               | 20                | 2                      | 12%                          | 2                      |
| 1049       | 40S ribosomal protein S13                                             | 4506685                 | 17                | 2                      | 19%                          | 2                      |
| 1050       | lon protease homolog, mitochondrial                                   | 21396489                | 106               | 2                      | 2.60%                        | 2                      |
| 1051       | UBX domain-containing protein 6 isoform 1                             | 13376854                | 50                | 2                      | 11%                          | 2                      |
| 1052       | translocation protein SEC63 homolog                                   | 6005872                 | 88                | 2                      | 2.60%                        | 2                      |
| 1053       | beta-mannosidase precursor                                            | 84798622                | 101               | 2                      | 2.50%                        | 2                      |
| 1054       | ubiquitin-like-conjugating enzyme ATG3                                | 19526773                | 36                | 2                      | 8.90%                        | 2                      |
| 1055       | transmembrane protein 209                                             | 66348165                | 63                | 2                      | 7.70%                        | 2                      |
