# Supplementary material for: Spermatozoa protein alterations in infertile men with bilateral varicocele
Source: PubMed Central journal article supplement — Asian J Androl. 2015 May 22;18(1):43–53. doi: 10.4103/1008-682X.153848 (PMC4736356; doi:10.4103/1008-682x.153848), 2015-05-22
Supplement: AJA-18-43_Suppl3.pdf [file AJA-18-43_Suppl3.pdf]

**Supplementary Table 3: Global proteomic profiling of fertile control group in triplicate - Second run**

| No. | Gel 2                                                                |                  |            |                 |                       |                 |
|-----|----------------------------------------------------------------------|------------------|------------|-----------------|-----------------------|-----------------|
|     | Protein                                                              | Accession number | Mass (kDa) | Peptides number | Sequence coverage (%) | Spectral counts |
| 1   | semenogelin-2 precursor                                              | 4506885          | 65         | 54              | 73                    | 2269            |
| 2   | semenogelin-1 preproprotein                                          | 4506883          | 52         | 65              | 73                    | 1646            |
| 3   | A-kinase anchor protein 4 isoform 2                                  | 21493039         | 93         | 68              | 73                    | 1235            |
| 4   | lactotransferrin isoform 1 precursor                                 | 54607120         | 78         | 76              | 82                    | 1137            |
| 5   | tubulin beta-4B chain                                                | 5174735          | 50         | 33              | 72                    | 953             |
| 6   | fibronectin isoform 3 preproprotein                                  | 16933542         | 259        | 112             | 56                    | 842             |
| 7   | heat shock-related 70 protein 2                                      | 13676857         | 70         | 49              | 68                    | 840             |
| 8   | tubulin alpha-3C/D chain                                             | 17921993         | 50         | 34              | 68                    | 682             |
| 9   | keratin, type II cytoskeletal 1                                      | 119395750        | 66         | 39              | 60                    | 672             |
| 10  | actin, cytoplasmic 1                                                 | 4501885          | 42         | 33              | 85                    | 656             |
| 11  | clusterin preproprotein                                              | 355594753        | 52         | 30              | 50                    | 591             |
| 12  | keratin, type I cytoskeletal 10                                      | 195972866        | 59         | 32              | 55                    | 562             |
| 13  | 78 glucose-regulated protein precursor                               | 16507237         | 72         | 37              | 56                    | 560             |
| 14  | heat shock protein HSP 90-alpha isoform 1                            | 153792590        | 98         | 52              | 50                    | 541             |
| 15  | keratin, type I cytoskeletal 9                                       | 55956899         | 62         | 32              | 49                    | 516             |
| 16  | A-kinase anchor protein 3                                            | 21493041         | 95         | 48              | 58                    | 513             |
| 17  | keratin, type II cytoskeletal 2 epidermal                            | 47132620         | 65         | 30              | 57                    | 478             |
| 18  | pyruvate kinase isozymes M1/M2 isoform c                             | 332164775        | 66         | 39              | 67                    | 456             |
| 19  | heat shock cognate 71 protein isoform 1                              | 5729877          | 71         | 17              | 45                    | 436             |
| 20  | endoplasmic precursor                                                | 4507677          | 92         | 49              | 52                    | 430             |
| 21  | ATP synthase subunit beta, mitochondrial precursor                   | 32189394         | 57         | 31              | 75                    | 427             |
| 22  | prostatic acid phosphatase isoform TM- PAP precursor                 | 197116348        | 48         | 18              | 32                    | 425             |
| 23  | alpha-enolase isoform 1                                              | 4503571          | 47         | 38              | 80                    | 382             |
| 24  | heat shock 70 protein 1-like                                         | 124256496        | 70         | 24              | 52                    | 370             |
| 25  | heat shock protein HSP 90-beta                                       | 20149594         | 83         | 20              | 45                    | 359             |
| 26  | protein disulfide-isomerase A3 precursor                             | 21361657         | 57         | 39              | 71                    | 343             |
| 27  | heat shock 70 protein 1A/1B                                          | 194248072        | 70         | 15              | 48                    | 342             |
| 28  | tubulin beta-3 chain isoform 1                                       | 50592996         | 50         | 2               | 32                    | 337             |
| 29  | glyceraldehyde-3-phosphate dehydrogenase, testis-specific            | 7657116          | 45         | 20              | 76                    | 331             |
| 30  | prolactin-inducible protein precursor                                | 4505821          | 17         | 14              | 77                    | 317             |
| 31  | fructose-bisphosphate aldolase A isoform 2                           | 342187211        | 45         | 33              | 81                    | 306             |
| 32  | calcium-binding tyrosine phosphorylation-regulated protein isoform c | 24797112         | 41         | 24              | 69                    | 287             |
| 33  | outer dense fiber protein 2 isoform 3                                | 310750406        | 81         | 31              | 41                    | 279             |
| 34  | prostate-specific antigen isoform 1 preproprotein                    | 4502173          | 29         | 15              | 69                    | 276             |
| 35  | tubulin beta chain                                                   | 29788785         | 50         | 2               | 60                    | 276             |
| 36  | calcium-binding tyrosine phosphorylation-regulated protein isoform a | 24797108         | 53         | 7               | 43                    | 270             |
| 37  | tubulin alpha-1A chain                                               | 17986283         | 50         | 2               | 59                    | 257             |
| 38  | keratin, type II cytoskeletal 6A                                     | 5031839          | 60         | 15              | 48                    | 242             |

Contd...

Supplementary Table 3: Contd...

| No. | Protein                                                                              | Gel 2            |            |                 |                       |                 |
|-----|--------------------------------------------------------------------------------------|------------------|------------|-----------------|-----------------------|-----------------|
|     |                                                                                      | Accession number | Mass (kDa) | Peptides number | Sequence coverage (%) | Spectral counts |
| 39  | elongation factor 1-alpha 1                                                          | 4503471          | 50         | 24              | 56                    | 238             |
| 40  | keratin, type II cytoskeletal 5                                                      | 119395754        | 62         | 17              | 36                    | 233             |
| 41  | tubulin alpha-1C chain                                                               | 14389309         | 50         | 2               | 55                    | 230             |
| 42  | keratin, type I cytoskeletal 14                                                      | 15431310         | 52         | 11              | 34                    | 228             |
| 43  | keratin, type I cytoskeletal 13 isoform a                                            | 131412225        | 50         | 24              | 58                    | 224             |
| 44  | triosephosphate isomerase isoform 2                                                  | 226529917        | 31         | 24              | 86                    | 221             |
| 45  | plastin-2                                                                            | 167614506        | 70         | 35              | 66                    | 220             |
| 46  | hypoxia up-regulated protein 1 precursor                                             | 5453832          | 111        | 40              | 40                    | 210             |
| 47  | ropporin-1A                                                                          | 21359920         | 24         | 14              | 77                    | 207             |
| 48  | leucine-rich repeat-containing protein 37B precursor                                 | 53829385         | 106        | 27              | 31                    | 206             |
| 49  | ATP synthase subunit alpha, mitochondrial precursor                                  | 4757810          | 60         | 28              | 51                    | 197             |
| 50  | aminopeptidase N precursor                                                           | 157266300        | 110        | 44              | 47                    | 196             |
| 51  | pyruvate kinase isozymes M1/M2 isoform a                                             | 33286418         | 58         | 2               | 71                    | 194             |
| 52  | acetyl-CoA acetyltransferase, mitochondrial precursor                                | 4557237          | 45         | 26              | 58                    | 194             |
| 53  | ruvB-like 2                                                                          | 5730023          | 51         | 28              | 61                    | 193             |
| 54  | annexin A1                                                                           | 4502101          | 39         | 25              | 66                    | 188             |
| 55  | T-complex protein 1 subunit beta isoform 1                                           | 5453603          | 57         | 31              | 67                    | 187             |
| 56  | 60 heat shock protein, mitochondrial                                                 | 31542947         | 61         | 34              | 71                    | 186             |
| 57  | malate dehydrogenase, mitochondrial precursor                                        | 21735621         | 36         | 21              | 68                    | 185             |
| 58  | myosin-9                                                                             | 12667788         | 227        | 64              | 37                    | 182             |
| 59  | fumarate hydratase, mitochondrial                                                    | 19743875         | 55         | 27              | 65                    | 177             |
| 60  | creatine kinase B-type                                                               | 21536286         | 43         | 18              | 60                    | 167             |
| 61  | angiotensin-converting enzyme isoform 1 precursor                                    | 4503273          | 150        | 32              | 30                    | 166             |
| 62  | heat shock protein beta-1                                                            | 4504517          | 23         | 17              | 82                    | 166             |
| 63  | nuclear pore membrane glycoprotein 210-like isoform 1 precursor                      | 117414168        | 211        | 54              | 36                    | 165             |
| 64  | phosphoglycerate kinase 2                                                            | 31543397         | 45         | 26              | 69                    | 164             |
| 65  | glyceraldehyde-3-phosphate dehydrogenase                                             | 7669492          | 36         | 19              | 72                    | 159             |
| 66  | fatty acid synthase                                                                  | 41872631         | 273        | 37              | 14                    | 158             |
| 67  | annexin A5                                                                           | 4502107          | 36         | 23              | 73                    | 157             |
| 68  | uncharacterized protein C1orf56 precursor                                            | 20149646         | 37         | 13              | 48                    | 156             |
| 69  | T-complex protein 1 subunit gamma isoform a                                          | 63162572         | 61         | 24              | 53                    | 150             |
| 70  | annexin A2 isoform 1                                                                 | 50845388         | 40         | 25              | 55                    | 149             |
| 71  | leucine-rich repeat-containing protein 37A precursor                                 | 289547512        | 188        | 19              | 13                    | 146             |
| 72  | ruvB-like 1                                                                          | 4506753          | 50         | 22              | 60                    | 143             |
| 73  | acrosin-binding protein precursor                                                    | 17999524         | 61         | 21              | 48                    | 143             |
| 74  | keratin, type I cytoskeletal 16                                                      | 24430192         | 51         | 9               | 43                    | 139             |
| 75  | dipeptidyl peptidase 4                                                               | 18765694         | 88         | 33              | 41                    | 137             |
| 76  | calreticulin precursor                                                               | 4757900          | 48         | 19              | 63                    | 137             |
| 77  | transitional endoplasmic reticulum ATPase                                            | 6005942          | 89         | 30              | 49                    | 136             |
| 78  | glutathione S-transferase Mu 3                                                       | 23065552         | 27         | 20              | 75                    | 132             |
| 79  | hexokinase-1 isoform HKI-ta/tb                                                       | 15991831         | 103        | 34              | 37                    | 130             |
| 80  | aconitate hydratase, mitochondrial precursor                                         | 4501867          | 85         | 23              | 36                    | 130             |
| 81  | phospholipid hydroperoxide glutathione peroxidase, mitochondrial isoform A precursor | 75709200         | 22         | 15              | 60                    | 127             |
| 82  | ropporin-1B                                                                          | 59891409         | 24         | 3               | 68                    | 126             |
| 83  | keratin, type II cytoskeletal 4                                                      | 331999954        | 56         | 27              | 61                    | 126             |
| 84  | succinate dehydrogenase [ubiquinone] flavoprotein subunit, mitochondrial             | 156416003        | 73         | 25              | 43                    | 125             |
| 85  | tubulin beta-6 chain                                                                 | 14210536         | 50         | 3               | 18                    | 121             |
| 86  | sperm acrosome membrane-associated protein 1 precursor                               | 13569934         | 32         | 9               | 42                    | 118             |
| 87  | sorbitol dehydrogenase                                                               | 156627571        | 38         | 13              | 43                    | 118             |
| 88  | cytochrome b-c1 complex subunit 2, mitochondrial precursor                           | 50592988         | 48         | 17              | 42                    | 116             |
| 89  | T-complex protein 1 subunit theta                                                    | 48762932         | 60         | 30              | 53                    | 116             |
| 90  | lipoprotein lipase precursor                                                         | 4557727          | 53         | 16              | 30                    | 116             |
| 91  | zona pellucida-binding protein 1 isoform 1 precursor                                 | 229577313        | 40         | 14              | 52                    | 115             |

Contd...

Supplementary Table 3: Contd...

| No. | Protein                                                                                                            | Gel 2            |            |                 |                       |                 |
|-----|--------------------------------------------------------------------------------------------------------------------|------------------|------------|-----------------|-----------------------|-----------------|
|     |                                                                                                                    | Accession number | Mass (kDa) | Peptides number | Sequence coverage (%) | Spectral counts |
| 92  | cathelicidin antimicrobial peptide preproprotein                                                                   | 348041314        | 20         | 12              | 51                    | 115             |
| 93  | trifunctional enzyme subunit beta, mitochondrial precursor                                                         | 4504327          | 51         | 26              | 59                    | 114             |
| 94  | serum albumin preproprotein                                                                                        | 4502027          | 69         | 32              | 60                    | 113             |
| 95  | 14-3-3 protein epsilon                                                                                             | 5803225          | 29         | 22              | 74                    | 110             |
| 96  | long-chain-fatty-acid--CoA ligase 1                                                                                | 40807491         | 78         | 24              | 38                    | 109             |
| 97  | clathrin heavy chain 1                                                                                             | 4758012          | 192        | 37              | 28                    | 107             |
| 98  | pyruvate dehydrogenase E1 component subunit beta, mitochondrial isoform 1 precursor                                | 156564403        | 39         | 14              | 47                    | 106             |
| 99  | elongation factor 1-gamma                                                                                          | 4503481          | 50         | 16              | 49                    | 104             |
| 100 | sperm protein associated with the nucleus on the X chromosome B/F                                                  | 22027492         | 12         | 8               | 81                    | 102             |
| 101 | cytochrome c oxidase subunit 4 isoform 1, mitochondrial precursor                                                  | 4502981          | 20         | 15              | 58                    | 100             |
| 102 | ras-related protein Rab-2A isoform a                                                                               | 4506365          | 24         | 14              | 64                    | 99              |
| 103 | neutral alpha-glucosidase AB isoform 2 precursor                                                                   | 38202257         | 107        | 26              | 34                    | 98              |
| 104 | elongation factor 2                                                                                                | 4503483          | 95         | 27              | 36                    | 98              |
| 105 | T-complex protein 1 subunit epsilon                                                                                | 24307939         | 60         | 26              | 57                    | 98              |
| 106 | trifunctional enzyme subunit alpha, mitochondrial precursor                                                        | 20127408         | 83         | 25              | 39                    | 97              |
| 107 | T-complex protein 1 subunit delta                                                                                  | 38455427         | 58         | 20              | 42                    | 96              |
| 108 | cysteine-rich secretory protein 1 isoform 1 precursor                                                              | 327315372        | 28         | 11              | 43                    | 96              |
| 109 | peroxiredoxin-1                                                                                                    | 320461711        | 22         | 13              | 63                    | 96              |
| 110 | 14-3-3 protein zeta/delta                                                                                          | 4507953          | 28         | 12              | 65                    | 96              |
| 111 | dolichyl-diphosphooligosaccharide-- protein glycosyltransferase subunit 1 precursor                                | 4506675          | 69         | 26              | 55                    | 95              |
| 112 | tektin-2                                                                                                           | 16507950         | 50         | 22              | 58                    | 95              |
| 113 | tektin-3                                                                                                           | 13994250         | 57         | 20              | 45                    | 95              |
| 114 | radial spoke head protein 6 homolog A                                                                              | 13540559         | 81         | 17              | 43                    | 94              |
| 115 | izumo sperm-egg fusion protein 4 isoform 1 precursor                                                               | 89903025         | 24         | 9               | 50                    | 94              |
| 116 | sperm protein associated with the nucleus on the X chromosome C                                                    | 13435137         | 11         | 11              | 91                    | 93              |
| 117 | saccharopine dehydrogenase-like oxidoreductase                                                                     | 55770836         | 47         | 15              | 49                    | 93              |
| 118 | erlin-2 isoform 1                                                                                                  | 6005721          | 38         | 20              | 57                    | 92              |
| 119 | protein disulfide-isomerase precursor                                                                              | 20070125         | 57         | 21              | 47                    | 88              |
| 120 | annexin A6 isoform 1                                                                                               | 71773329         | 76         | 19              | 34                    | 87              |
| 121 | histone H2B type 1-A                                                                                               | 24586679         | 14         | 9               | 50                    | 87              |
| 122 | cytosol aminopeptidase                                                                                             | 41393561         | 56         | 25              | 63                    | 87              |
| 123 | protein FAM166A                                                                                                    | 48717426         | 36         | 16              | 55                    | 86              |
| 124 | laminin subunit beta-2 precursor                                                                                   | 119703755        | 196        | 27              | 22                    | 86              |
| 125 | T-complex protein 1 subunit alpha isoform a                                                                        | 57863257         | 60         | 17              | 39                    | 85              |
| 126 | peroxiredoxin-6                                                                                                    | 4758638          | 25         | 14              | 64                    | 84              |
| 127 | sperm equatorial segment protein 1 precursor                                                                       | 21717832         | 39         | 12              | 33                    | 84              |
| 128 | L-lactate dehydrogenase C chain                                                                                    | 4504973          | 36         | 17              | 52                    | 82              |
| 129 | T-complex protein 1 subunit eta isoform a                                                                          | 5453607          | 59         | 18              | 45                    | 82              |
| 130 | citrate synthase, mitochondrial precursor                                                                          | 38327625         | 52         | 17              | 49                    | 82              |
| 131 | NADH-ubiquinone oxidoreductase 75 subunit, mitochondrial isoform 1                                                 | 33519475         | 79         | 19              | 32                    | 80              |
| 132 | gastricsin isoform 1 preproprotein                                                                                 | 4505757          | 42         | 5               | 9.80                  | 79              |
| 133 | dihydrolipoyl dehydrogenase, mitochondrial precursor                                                               | 91199540         | 54         | 17              | 48                    | 76              |
| 134 | carnitine O-palmitoyltransferase 2, mitochondrial precursor                                                        | 4503023          | 74         | 24              | 47                    | 76              |
| 135 | valyl-tRNA synthetase                                                                                              | 5454158          | 140        | 24              | 25                    | 75              |
| 136 | dynein light chain 2, cytoplasmic                                                                                  | 18087855         | 10         | 5               | 65                    | 74              |
| 137 | histone H4                                                                                                         | 4504303          | 11         | 10              | 60                    | 74              |
| 138 | cAMP-dependent protein kinase type II- alpha regulatory subunit                                                    | 4758958          | 46         | 16              | 50                    | 74              |
| 139 | dynein light chain 1, cytoplasmic                                                                                  | 4505813          | 10         | 9               | 65                    | 73              |
| 140 | T-complex protein 1 subunit zeta-2 isoform 1                                                                       | 58331173         | 58         | 8               | 34                    | 73              |
| 141 | cAMP-dependent protein kinase type I- alpha regulatory subunit                                                     | 4506063          | 43         | 14              | 41                    | 72              |
| 142 | ubiquitin-40S ribosomal protein S27a precursor                                                                     | 208022622        | 18         | 4               | 30                    | 72              |
| 143 | 2,4-dienoyl-CoA reductase, mitochondrial precursor                                                                 | 4503301          | 36         | 13              | 50                    | 72              |
| 144 | mitochondrial inner membrane protein isoform 3                                                                     | 154354966        | 83         | 23              | 37                    | 71              |
| 145 | dihydrolipoyllysine-residue acetyltransferase component of pyruvate dehydrogenase complex, mitochondrial precursor | 31711992         | 69         | 20              | 38                    | 71              |

Contd...

Supplementary Table 3: Contd...

| No. | Protein                                                                                       | Gel 2            |            |                 |                       |                 |
|-----|-----------------------------------------------------------------------------------------------|------------------|------------|-----------------|-----------------------|-----------------|
|     |                                                                                               | Accession number | Mass (kDa) | Peptides number | Sequence coverage (%) | Spectral counts |
| 146 | keratin, type I cytoskeletal 17                                                               | 4557701          | 48         | 5               | 25                    | 70              |
| 147 | 6-phosphofructokinase type C isoform 1                                                        | 11321601         | 86         | 23              | 34                    | 68              |
| 148 | vesicular integral-membrane protein VIP36 precursor                                           | 5803023          | 40         | 12              | 49                    | 68              |
| 149 | agrin precursor                                                                               | 54873613         | 215        | 27              | 21                    | 67              |
| 150 | serum amyloid P-component precursor                                                           | 4502133          | 25         | 9               | 34                    | 67              |
| 151 | voltage-dependent anion-selective channel protein 2 isoform 2                                 | 296317339        | 32         | 12              | 53                    | 67              |
| 152 | cytosolic non-specific dipeptidase isoform 1                                                  | 271398239        | 53         | 18              | 42                    | 66              |
| 153 | protein disulfide-isomerase A4 precursor                                                      | 4758304          | 73         | 24              | 40                    | 65              |
| 154 | acrosomal protein SP-10 isoform a precursor                                                   | 4501879          | 28         | 7               | 24                    | 65              |
| 155 | isocitrate dehydrogenase [NADP] cytoplasmic                                                   | 28178825         | 47         | 16              | 37                    | 63              |
| 156 | calnexin precursor                                                                            | 10716563         | 68         | 18              | 31                    | 63              |
| 157 | cytochrome c oxidase subunit 5A, mitochondrial precursor                                      | 190885499        | 17         | 9               | 47                    | 63              |
| 158 | peptidyl-prolyl cis-trans isomerase A                                                         | 10863927         | 18         | 11              | 67                    | 63              |
| 159 | cytochrome c oxidase subunit II                                                               | 251831110        | 26         | 7               | 48                    | 63              |
| 160 | heat shock 70 protein 4L                                                                      | 31541941         | 95         | 21              | 33                    | 63              |
| 161 | hyaluronidase PH-20 isoform 2                                                                 | 291290981        | 58         | 8               | 20                    | 63              |
| 162 | laminin subunit alpha-5 precursor                                                             | 21264602         | 400        | 29              | 10                    | 62              |
| 163 | dipeptidase 3 isoform a precursor                                                             | 193211608        | 56         | 15              | 41                    | 62              |
| 164 | adipocyte plasma membrane-associated protein                                                  | 24308201         | 46         | 15              | 50                    | 61              |
| 165 | plastin-3 isoform 1                                                                           | 209862851        | 71         | 9               | 24                    | 61              |
| 166 | erlin-1                                                                                       | 154800487        | 39         | 9               | 38                    | 61              |
| 167 | radial spoke head 1 homolog                                                                   | 18254456         | 35         | 12              | 54                    | 60              |
| 168 | protein disulfide-isomerase A6 precursor                                                      | 5031973          | 48         | 14              | 38                    | 60              |
| 169 | L-asparaginase                                                                                | 145275200        | 32         | 12              | 56                    | 59              |
| 170 | protein-glutamine gamma-glutamyltransferase 4                                                 | 156627577        | 77         | 17              | 15                    | 59              |
| 171 | tektin-4                                                                                      | 21389613         | 51         | 16              | 44                    | 58              |
| 172 | sperm protein associated with the nucleus on the X chromosome E                               | 22027496         | 11         | 2               | 89                    | 57              |
| 173 | ezrin                                                                                         | 21614499         | 69         | 11              | 21                    | 56              |
| 174 | 14-3-3 protein sigma                                                                          | 5454052          | 28         | 10              | 49                    | 56              |
| 175 | stress-70 protein, mitochondrial precursor                                                    | 24234688         | 74         | 14              | 29                    | 56              |
| 176 | annexin A3                                                                                    | 4826643          | 36         | 11              | 35                    | 55              |
| 177 | peroxiredoxin-2 isoform a                                                                     | 32189392         | 22         | 11              | 42                    | 55              |
| 178 | adenylate kinase isoenzyme 1                                                                  | 4502011          | 22         | 11              | 55                    | 55              |
| 179 | ATP synthase subunit O, mitochondrial precursor                                               | 4502303          | 23         | 10              | 54                    | 55              |
| 180 | 14-3-3 protein theta                                                                          | 5803227          | 28         | 10              | 56                    | 54              |
| 181 | sperm surface protein Sp17                                                                    | 8394343          | 17         | 8               | 75                    | 53              |
| 182 | plasma serine protease inhibitor precursor                                                    | 194018472        | 46         | 14              | 39                    | 53              |
| 183 | alpha-actinin-4                                                                               | 12025678         | 105        | 19              | 27                    | 53              |
| 184 | myosin light polypeptide 6 isoform 2                                                          | 88999583         | 17         | 9               | 76                    | 53              |
| 185 | succinyl-CoA: 3-ketoacid-coenzyme A transferase 1, mitochondrial precursor                    | 4557817          | 56         | 13              | 32                    | 53              |
| 186 | epididymal sperm-binding protein 1 precursor                                                  | 301601648        | 26         | 8               | 42                    | 53              |
| 187 | T-complex protein 1 subunit zeta isoform a                                                    | 4502643          | 58         | 12              | 26                    | 53              |
| 188 | phosphoglycerate kinase 1                                                                     | 4505763          | 45         | 8               | 41                    | 52              |
| 189 | importin subunit beta-1                                                                       | 19923142         | 97         | 12              | 18                    | 52              |
| 190 | radial spoke head protein 9 homolog isoform 1                                                 | 32964825         | 31         | 16              | 74                    | 52              |
| 191 | peroxiredoxin-5, mitochondrial isoform a precursor                                            | 6912238          | 22         | 11              | 56                    | 52              |
| 192 | laminin subunit gamma-1 precursor                                                             | 145309326        | 178        | 21              | 19                    | 52              |
| 193 | cytochrome b-c1 complex subunit 1, mitochondrial precursor                                    | 46593007         | 53         | 15              | 35                    | 52              |
| 194 | myeloid leukemia factor 1 isoform 1                                                           | 11967975         | 31         | 11              | 37                    | 52              |
| 195 | protein phosphatase 1 regulatory subunit 7                                                    | 4506013          | 42         | 13              | 44                    | 52              |
| 196 | voltage-dependent anion-selective channel protein 3 isoform 1                                 | 25188179         | 31         | 12              | 39                    | 51              |
| 197 | very long-chain specific acyl-CoA dehydrogenase, mitochondrial isoform 2 precursor            | 76496475         | 68         | 15              | 28                    | 51              |
| 198 | ATP synthase subunit d, mitochondrial isoform a                                               | 5453559          | 18         | 9               | 78                    | 51              |
| 199 | dolichyl-diphosphooligosaccharide-- protein glycosyltransferase subunit 2 isoform 2 precursor | 209413738        | 68         | 12              | 31                    | 51              |
| 200 | alpha-centractin                                                                              | 5031569          | 43         | 12              | 59                    | 50              |

Contd...

**Supplementary Table 3: Contd...**

| No. | Protein                                                                                                                               | Gel 2            |            |                 |                       |                 |
|-----|---------------------------------------------------------------------------------------------------------------------------------------|------------------|------------|-----------------|-----------------------|-----------------|
|     |                                                                                                                                       | Accession number | Mass (kDa) | Peptides number | Sequence coverage (%) | Spectral counts |
| 201 | peptidyl-prolyl cis-trans isomerase B precursor                                                                                       | 4758950          | 24         | 11              | 54                    | 50              |
| 202 | elongation factor 1-delta isoform 1                                                                                                   | 304555581        | 71         | 10              | 19                    | 50              |
| 203 | peroxiredoxin-4 precursor                                                                                                             | 5453549          | 31         | 13              | 56                    | 49              |
| 204 | cytochrome c oxidase subunit 5B, mitochondrial precursor                                                                              | 17017988         | 14         | 13              | 51                    | 49              |
| 205 | matrix-remodeling-associated protein 5 precursor                                                                                      | 139948432        | 312        | 18              | 7.10                  | 49              |
| 206 | nucleobindin-2 precursor                                                                                                              | 4826870          | 50         | 14              | 46                    | 49              |
| 207 | D-3-phosphoglycerate dehydrogenase                                                                                                    | 23308577         | 57         | 8               | 17                    | 47              |
| 208 | single-stranded DNA-binding protein, mitochondrial precursor                                                                          | 4507231          | 17         | 10              | 59                    | 47              |
| 209 | olfactomedin-4 precursor                                                                                                              | 32313593         | 57         | 13              | 35                    | 47              |
| 210 | serpin B6                                                                                                                             | 41152086         | 43         | 15              | 56                    | 47              |
| 211 | thioredoxin domain-containing protein 3                                                                                               | 148839372        | 67         | 17              | 33                    | 47              |
| 212 | nuclear pore complex protein Nup155 isoform 1                                                                                         | 24430149         | 155        | 16              | 15                    | 46              |
| 213 | vesicle-associated membrane protein- associated protein A isoform 2                                                                   | 94721252         | 28         | 9               | 49                    | 46              |
| 214 | calmodulin                                                                                                                            | 58218968         | 17         | 11              | 81                    | 46              |
| 215 | WD repeat-containing protein 16 isoform b                                                                                             | 124028512        | 68         | 15              | 34                    | 46              |
| 216 | uncharacterized protein KIAA1683 isoform a                                                                                            | 224451032        | 147        | 17              | 16                    | 45              |
| 217 | electron transfer flavoprotein subunit alpha, mitochondrial isoform a                                                                 | 4503607          | 35         | 12              | 53                    | 45              |
| 218 | fructose-bisphosphate aldolase C                                                                                                      | 4885063          | 39         | 2               | 21                    | 44              |
| 219 | sperm acrosome membrane-associated protein 3                                                                                          | 27777653         | 23         | 7               | 33                    | 44              |
| 220 | protein FAM71B                                                                                                                        | 222418633        | 65         | 10              | 15                    | 44              |
| 221 | keratin, type II cytoskeletal 8                                                                                                       | 4504919          | 54         | 8               | 25                    | 44              |
| 222 | histone H2A type 1-A                                                                                                                  | 25092737         | 14         | 6               | 35                    | 43              |
| 223 | beta-2-microglobulin precursor                                                                                                        | 4757826          | 14         | 4               | 38                    | 43              |
| 224 | actin-related protein T2                                                                                                              | 29893808         | 42         | 14              | 54                    | 43              |
| 225 | 26S protease regulatory subunit 6A                                                                                                    | 21361144         | 49         | 13              | 31                    | 43              |
| 226 | isocitrate dehydrogenase [NAD] subunit alpha, mitochondrial precursor                                                                 | 5031777          | 40         | 9               | 30                    | 43              |
| 227 | mucin-6 precursor                                                                                                                     | 151301154        | 257        | 18              | 9.70                  | 43              |
| 228 | profilin-1                                                                                                                            | 4826898          | 15         | 8               | 59                    | 43              |
| 229 | neprilysin                                                                                                                            | 116256329        | 86         | 16              | 26                    | 43              |
| 230 | 60S acidic ribosomal protein P0                                                                                                       | 16933546         | 34         | 12              | 47                    | 42              |
| 231 | axonemal dynein light intermediate polypeptide 1                                                                                      | 37595560         | 32         | 11              | 40                    | 42              |
| 232 | 26S proteasome non-ATPase regulatory subunit 13 isoform 1                                                                             | 157502193        | 43         | 14              | 47                    | 40              |
| 233 | keratin, type II cytoskeletal 6B                                                                                                      | 119703753        | 60         | 2               | 23                    | 40              |
| 234 | acrosin precursor                                                                                                                     | 148613878        | 46         | 12              | 31                    | 39              |
| 235 | importin subunit alpha-2                                                                                                              | 4504897          | 58         | 13              | 40                    | 39              |
| 236 | outer dense fiber protein 3                                                                                                           | 19526475         | 28         | 12              | 51                    | 39              |
| 237 | 26S protease regulatory subunit 4                                                                                                     | 24430151         | 49         | 11              | 22                    | 38              |
| 238 | nuclear pore complex protein Nup93 isoform 1                                                                                          | 208609990        | 93         | 16              | 27                    | 38              |
| 239 | importin-5                                                                                                                            | 24797086         | 126        | 12              | 16                    | 38              |
| 240 | glutathione S-transferase P                                                                                                           | 4504183          | 23         | 7               | 52                    | 38              |
| 241 | sperm-associated antigen 6 isoform 1                                                                                                  | 6912678          | 55         | 14              | 44                    | 38              |
| 242 | tripeptidyl-peptidase 2                                                                                                               | 186972143        | 138        | 16              | 20                    | 37              |
| 243 | carboxypeptidase Z isoform 2 precursor                                                                                                | 62388875         | 73         | 12              | 26                    | 37              |
| 244 | glutamine synthetase                                                                                                                  | 19923206         | 42         | 9               | 26                    | 37              |
| 245 | enkurin                                                                                                                               | 21450721         | 29         | 8               | 46                    | 37              |
| 246 | dihydrolipoyllysine-residue succinyltransferase component of 2- oxoglutarate dehydrogenase complex, mitochondrial isoform 1 precursor | 19923748         | 49         | 12              | 39                    | 37              |
| 247 | cofilin-1                                                                                                                             | 5031635          | 19         | 8               | 64                    | 36              |
| 248 | 26S proteasome non-ATPase regulatory subunit 7                                                                                        | 25777615         | 37         | 8               | 39                    | 36              |
| 249 | L-lactate dehydrogenase A chain isoform 3                                                                                             | 260099723        | 40         | 11              | 42                    | 36              |
| 250 | uncharacterized protein C20orf106 precursor                                                                                           | 71043622         | 20         | 6               | 51                    | 36              |
| 251 | mitochondrial carrier homolog 2                                                                                                       | 7657347          | 33         | 8               | 40                    | 35              |
| 252 | dolichyl-diphosphooligosaccharide-- protein glycosyltransferase 48 subunit precursor                                                  | 20070197         | 51         | 12              | 41                    | 35              |
| 253 | glucose-6-phosphate isomerase isoform 2                                                                                               | 18201905         | 63         | 9               | 23                    | 35              |
| 254 | medium-chain specific acyl-CoA dehydrogenase, mitochondrial isoform b precursor                                                       | 187960098        | 47         | 12              | 38                    | 35              |
| 255 | 2-oxoglutarate dehydrogenase, mitochondrial isoform 3 precursor                                                                       | 259013553        | 116        | 14              | 20                    | 35              |
| 256 | malectin precursor                                                                                                                    | 7661948          | 32         | 10              | 43                    | 35              |
| 257 | carboxypeptidase E preproprotein                                                                                                      | 4503009          | 53         | 7               | 13                    | 34              |

Contd...

**Supplementary Table 3: Contd...**

| No. | Protein                                                                                          | Accession number | Mass (kDa) | Peptides number | Sequence coverage (%) | Spectral counts |
|-----|--------------------------------------------------------------------------------------------------|------------------|------------|-----------------|-----------------------|-----------------|
| 258 | electron transfer flavoprotein subunit beta isoform 1                                            | 4503609          | 28         | 12              | 53                    | 34              |
| 259 | transmembrane emp24 domain- containing protein 10 precursor                                      | 98986464         | 25         | 9               | 30                    | 34              |
| 260 | nuclear pore membrane glycoprotein 210 precursor                                                 | 27477134         | 205        | 14              | 9.30                  | 34              |
| 261 | glucosidase 2 subunit beta isoform 1 precursor                                                   | 48255889         | 59         | 10              | 20                    | 34              |
| 262 | keratin, type I cytoskeletal 19                                                                  | 24234699         | 44         | 4               | 28                    | 34              |
| 263 | aspartate aminotransferase, mitochondrial precursor                                              | 73486658         | 48         | 12              | 36                    | 34              |
| 264 | protein dpy-19 homolog 2                                                                         | 93277105         | 87         | 12              | 18                    | 34              |
| 265 | desmoplakin isoform I                                                                            | 58530840         | 332        | 19              | 9.80                  | 34              |
| 266 | NADH dehydrogenase [ubiquinone] iron-sulfur protein 3, mitochondrial precursor                   | 4758788          | 30         | 10              | 40                    | 33              |
| 267 | ferritin, mitochondrial precursor                                                                | 29126241         | 28         | 10              | 41                    | 33              |
| 268 | 26S protease regulatory subunit 8 isoform 1                                                      | 24497435         | 46         | 9               | 32                    | 33              |
| 269 | synaptophysin-like protein 1 isoform a                                                           | 5803185          | 29         | 5               | 30                    | 33              |
| 270 | heme oxygenase 2                                                                                 | 8051608          | 36         | 13              | 51                    | 33              |
| 271 | succinate dehydrogenase [ubiquinone] iron-sulfur subunit, mitochondrial precursor                | 115387094        | 32         | 10              | 32                    | 33              |
| 272 | maltase-glucoamylase, intestinal                                                                 | 221316699        | 210        | 12              | 9.40                  | 33              |
| 273 | enoyl-CoA hydratase, mitochondrial                                                               | 194097323        | 31         | 11              | 45                    | 33              |
| 274 | prohibitin                                                                                       | 4505773          | 30         | 9               | 42                    | 33              |
| 275 | reticulocalbin-2 precursor                                                                       | 4506457          | 37         | 8               | 45                    | 33              |
| 276 | transmembrane emp24 domain- containing protein 9 precursor                                       | 39725636         | 27         | 8               | 29                    | 33              |
| 277 | protein-L-isoaspartate (D-aspartate) O- methyltransferase isoform 2                              | 354983493        | 30         | 9               | 49                    | 33              |
| 278 | coiled-coil domain-containing protein 19, mitochondrial precursor                                | 81295816         | 66         | 11              | 24                    | 33              |
| 279 | calcium-binding and spermatid-specific protein 1                                                 | 90652863         | 43         | 5               | 20                    | 33              |
| 280 | ubiquitin-like modifier-activating enzyme 1                                                      | 23510340         | 118        | 12              | 7.90                  | 32              |
| 281 | histone H3.1                                                                                     | 4504281          | 15         | 3               | 17                    | 32              |
| 282 | alcohol dehydrogenase [NADP+]                                                                    | 24497577         | 37         | 7               | 25                    | 32              |
| 283 | ADP-ribosylation factor 1                                                                        | 4502201          | 21         | 10              | 59                    | 32              |
| 284 | filamin-B isoform 2                                                                              | 105990514        | 278        | 17              | 9.10                  | 32              |
| 285 | 26S proteasome non-ATPase regulatory subunit 2                                                   | 25777602         | 100        | 13              | 21                    | 31              |
| 286 | nucleoporin p54                                                                                  | 26051237         | 55         | 11              | 27                    | 31              |
| 287 | nucleoside diphosphate kinase homolog 5                                                          | 4505413          | 24         | 6               | 49                    | 31              |
| 288 | ras-related protein Rab-11B                                                                      | 190358517        | 24         | 9               | 40                    | 31              |
| 289 | 3-hydroxyisobutyrate dehydrogenase, mitochondrial precursor                                      | 23308751         | 35         | 6               | 30                    | 31              |
| 290 | chloride intracellular channel protein 1                                                         | 14251209         | 27         | 7               | 34                    | 31              |
| 291 | ADP/ATP translocase 4                                                                            | 13775208         | 35         | 10              | 34                    | 31              |
| 292 | cytochrome c1, heme protein, mitochondrial                                                       | 21359867         | 35         | 10              | 53                    | 30              |
| 293 | proteasome subunit alpha type-5 isoform 1                                                        | 23110942         | 26         | 10              | 47                    | 30              |
| 294 | pyruvate dehydrogenase E1 component subunit alpha, testis-specific form, mitochondrial precursor | 4885543          | 43         | 9               | 20                    | 30              |
| 295 | lysosomal alpha-glucosidase preproprotein                                                        | 119393891        | 105        | 7               | 9.90                  | 30              |
| 296 | radial spoke head protein 3 homolog                                                              | 31543559         | 64         | 7               | 17                    | 30              |
| 297 | ras-related protein Rab-2B isoform 1                                                             | 21361884         | 24         | 3               | 50                    | 30              |
| 298 | hydroxyacylglutathione hydrolase, mitochondrial isoform 1 precursor                              | 94538322         | 34         | 8               | 32                    | 30              |
| 299 | coiled-coil domain-containing protein 147                                                        | 56961680         | 103        | 16              | 20                    | 29              |
| 300 | SYNJ2BP-COX16 protein isoform 1                                                                  | 321400118        | 21         | 6               | 26                    | 29              |
| 301 | hsc70-interacting protein                                                                        | 19923193         | 41         | 6               | 18                    | 29              |
| 302 | parkin coregulated gene protein isoform 2                                                        | 122939202        | 29         | 9               | 44                    | 29              |
| 303 | 26S protease regulatory subunit 10B                                                              | 195539395        | 46         | 8               | 31                    | 29              |
| 304 | proteasome subunit alpha type-6                                                                  | 23110944         | 27         | 10              | 43                    | 29              |
| 305 | proteasome subunit beta type-5 isoform 1                                                         | 4506201          | 28         | 9               | 39                    | 28              |
| 306 | delta (3,5)-Delta (2,4)-dienoyl-CoA isomerase, mitochondrial precursor                           | 70995211         | 36         | 11              | 41                    | 28              |
| 307 | apolipoprotein A-I preproprotein                                                                 | 4557321          | 31         | 7               | 25                    | 28              |
| 308 | myosin-10                                                                                        | 41406064         | 229        | 4               | 6.30                  | 28              |
| 309 | endophilin-B1 isoform 2                                                                          | 331284170        | 44         | 9               | 18                    | 28              |
| 310 | transmembrane protease serine 2 isoform 2                                                        | 205360943        | 54         | 6               | 11                    | 28              |
| 311 | 14-3-3 protein beta/alpha                                                                        | 21328448         | 28         | 3               | 35                    | 28              |
| 312 | lipid phosphate phosphohydrolase 1 isoform 1                                                     | 29171736         | 32         | 3               | 19                    | 28              |
| 313 | dynein heavy chain 17, axonemal                                                                  | 256542310        | 509        | 14              | 4.50                  | 28              |

*Contd...*

Supplementary Table 3: Contd...

| No. | Protein                                                                                  | Accession number | Mass (kDa) | Peptides number | Sequence coverage (%) | Spectral counts |
|-----|------------------------------------------------------------------------------------------|------------------|------------|-----------------|-----------------------|-----------------|
| 314 | eukaryotic initiation factor 4A-I isoform 1                                              | 4503529          | 46         | 8               | 22                    | 28              |
| 315 | carbonic anhydrase 4 precursor                                                           | 4502519          | 35         | 5               | 15                    | 27              |
| 316 | hydroxyacyl-coenzyme A dehydrogenase, mitochondrial isoform 1 precursor                  | 296179427        | 36         | 9               | 43                    | 27              |
| 317 | cytochrome b-c1 complex subunit 7 isoform 1                                              | 5454152          | 14         | 7               | 59                    | 27              |
| 318 | ATP synthase subunit b, mitochondrial precursor                                          | 21361565         | 29         | 9               | 41                    | 27              |
| 319 | 4-trimethylaminobutyraldehyde dehydrogenase                                              | 115387104        | 56         | 8               | 16                    | 27              |
| 320 | adenylate kinase 7                                                                       | 148727333        | 83         | 10              | 21                    | 27              |
| 321 | alpha-actinin-1 isoform c                                                                | 194097352        | 103        | 5               | 18                    | 27              |
| 322 | cullin-associated NEDD8-dissociated protein 1                                            | 21361794         | 136        | 11              | 12                    | 27              |
| 323 | dynein heavy chain 8, axonemal                                                           | 332688227        | 539        | 11              | 2.60                  | 27              |
| 324 | uncharacterized protein C7orf61                                                          | 51972226         | 24         | 5               | 34                    | 27              |
| 325 | 26S protease regulatory subunit 6B isoform 1                                             | 5729991          | 47         | 7               | 25                    | 26              |
| 326 | mitochondria-eating protein                                                              | 21687119         | 61         | 6               | 19                    | 26              |
| 327 | epididymal secretory protein E3-beta precursor                                           | 11641279         | 18         | 7               | 59                    | 26              |
| 328 | annexin A4                                                                               | 4502105          | 36         | 10              | 38                    | 26              |
| 329 | 26S proteasome non-ATPase regulatory subunit 14                                          | 5031981          | 35         | 7               | 45                    | 26              |
| 330 | G-protein coupled receptor 64 isoform 2 precursor                                        | 119943116        | 110        | 7               | 10.00                 | 26              |
| 331 | alpha-mannosidase 2C1                                                                    | 46852164         | 116        | 11              | 13                    | 26              |
| 332 | abhydrolase domain-containing protein 10, mitochondrial precursor                        | 8923001          | 34         | 5               | 26                    | 26              |
| 333 | plasma membrane calcium-transporting ATPase 4 isoform 4b                                 | 48255957         | 134        | 10              | 10                    | 26              |
| 334 | proteasome subunit alpha type-2                                                          | 4506181          | 26         | 8               | 44                    | 25              |
| 335 | uncharacterized protein C20orf107 precursor                                              | 71043642         | 19         | 8               | 32                    | 25              |
| 336 | glycerol kinase 2                                                                        | 41393575         | 61         | 10              | 22                    | 25              |
| 337 | vesicle-fusing ATPase                                                                    | 156564401        | 83         | 13              | 22                    | 25              |
| 338 | proteasome subunit alpha type-1 isoform 1                                                | 23110935         | 30         | 10              | 37                    | 25              |
| 339 | phosphatidylethanolamine-binding protein 1 preproprotein                                 | 4505621          | 21         | 7               | 61                    | 25              |
| 340 | 26S proteasome non-ATPase regulatory subunit 1 isoform 1                                 | 25777600         | 106        | 10              | 11                    | 25              |
| 341 | NADH-cytochrome b5 reductase 2                                                           | 47778923         | 31         | 10              | 53                    | 25              |
| 342 | uromodulin precursor                                                                     | 59850812         | 70         | 8               | 13                    | 25              |
| 343 | proteasome subunit alpha type-4 isoform 1                                                | 4506185          | 29         | 9               | 42                    | 25              |
| 344 | kunitz-type protease inhibitor 3 precursor                                               | 189571689        | 10         | 3               | 29                    | 25              |
| 345 | sodium/potassium-transporting ATPase subunit beta-3                                      | 4502281          | 32         | 5               | 30                    | 25              |
| 346 | UPF0733 protein C2orf88                                                                  | 110349742        | 11         | 7               | 68                    | 25              |
| 347 | sodium/potassium-transporting ATPase subunit alpha-4 isoform 1                           | 153946397        | 114        | 12              | 16                    | 24              |
| 348 | protein NDRG1                                                                            | 37655183         | 43         | 3               | 12                    | 24              |
| 349 | ES1 protein homolog, mitochondrial isoform 1a precursor                                  | 296531406        | 28         | 7               | 38                    | 24              |
| 350 | ubiquitin carboxyl-terminal hydrolase isozyme L3                                         | 5174741          | 26         | 7               | 40                    | 24              |
| 351 | proteasome subunit alpha type-7-like isoform 2                                           | 68303563         | 28         | 7               | 35                    | 24              |
| 352 | rho GDP-dissociation inhibitor 1 isoform a                                               | 4757768          | 23         | 6               | 38                    | 24              |
| 353 | NADH dehydrogenase [ubiquinone] flavoprotein 1, mitochondrial isoform 1 precursor        | 20149568         | 51         | 9               | 25                    | 24              |
| 354 | leucine zipper transcription factor-like protein 1                                       | 9966793          | 35         | 8               | 34                    | 24              |
| 355 | adenosylhomocysteinase isoform 1                                                         | 9951915          | 48         | 9               | 24                    | 24              |
| 356 | alanyl-tRNA editing protein Aarsd1 isoform 1                                             | 217416402        | 66         | 9               | 24                    | 23              |
| 357 | synaptic vesicle membrane protein VAT-1 homolog                                          | 18379349         | 42         | 8               | 28                    | 23              |
| 358 | ras-related protein Rab-14                                                               | 19923483         | 24         | 9               | 49                    | 23              |
| 359 | tektin-1                                                                                 | 16753231         | 48         | 10              | 29                    | 23              |
| 360 | calmegin precursor                                                                       | 4758004          | 70         | 9               | 21                    | 23              |
| 361 | proteasome subunit beta type-1                                                           | 4506193          | 26         | 6               | 29                    | 23              |
| 362 | solute carrier family 2, facilitated glucose transporter member 14                       | 23592238         | 56         | 7               | 13                    | 23              |
| 363 | coiled-coil-helix-coiled-coil-helix domain-containing protein 3, mitochondrial precursor | 8923390          | 26         | 9               | 31                    | 23              |
| 364 | lysosome-associated membrane glycoprotein 1 precursor                                    | 112380628        | 45         | 4               | 9.80                  | 23              |
| 365 | 26S protease regulatory subunit 7 isoform 1                                              | 4506209          | 49         | 9               | 27                    | 23              |
| 366 | protein S100-A9                                                                          | 4506773          | 13         | 6               | 53                    | 23              |
| 367 | 14-3-3 protein gamma                                                                     | 21464101         | 28         | 2               | 26                    | 23              |
| 368 | dynactin subunit 2                                                                       | 5453629          | 45         | 8               | 26                    | 23              |
| 369 | 26S proteasome non-ATPase regulatory subunit 11                                          | 28872725         | 47         | 7               | 18                    | 22              |
| 370 | protein DJ-1                                                                             | 31543380         | 20         | 9               | 47                    | 22              |

Contd...

**Supplementary Table 3: Contd...**

| No. | Protein                                                                        | Accession number | Mass (kDa) | Peptides number | Sequence coverage (%) | Spectral counts |
|-----|--------------------------------------------------------------------------------|------------------|------------|-----------------|-----------------------|-----------------|
| 371 | protein FAM154A                                                                | 301129242        | 55         | 5               | 16                    | 22              |
| 372 | glutathione reductase, mitochondrial isoform 1 precursor                       | 50301238         | 56         | 9               | 31                    | 22              |
| 373 | sperm acrosome-associated protein 5 precursor                                  | 120952755        | 18         | 4               | 31                    | 22              |
| 374 | transmembrane protein 190 precursor                                            | 21040263         | 19         | 5               | 31                    | 22              |
| 375 | calpain small subunit 1                                                        | 51599151         | 28         | 5               | 25                    | 22              |
| 376 | uncharacterized protein C9orf9                                                 | 33285006         | 19         | 6               | 52                    | 21              |
| 377 | glypican-4 precursor                                                           | 21614525         | 62         | 8               | 20                    | 21              |
| 378 | barrier-to-autointegration factor                                              | 4502389          | 10         | 6               | 63                    | 21              |
| 379 | signal peptidase complex subunit 2                                             | 162417971        | 25         | 6               | 15                    | 21              |
| 380 | short-chain specific acyl-CoA dehydrogenase, mitochondrial precursor           | 4557233          | 44         | 7               | 19                    | 21              |
| 381 | glutamate carboxypeptidase 2 isoform 1                                         | 4758398          | 84         | 9               | 19                    | 21              |
| 382 | vimentin                                                                       | 62414289         | 54         | 7               | 22                    | 21              |
| 383 | melanoma inhibitory activity protein 3 precursor                               | 122891870        | 214        | 9               | 6.90                  | 21              |
| 384 | EF-hand domain-containing family member C2                                     | 31542743         | 87         | 7               | 9.90                  | 21              |
| 385 | transmembrane emp24 domain- containing protein 4 precursor                     | 33457308         | 26         | 5               | 30                    | 21              |
| 386 | solute carrier family 2, facilitated glucose transporter member 3              | 5902090          | 54         | 3               | 14                    | 21              |
| 387 | lysyl-tRNA synthetase isoform 1                                                | 194272210        | 71         | 9               | 18                    | 20              |
| 388 | L-xylulose reductase isoform 1                                                 | 7705925          | 26         | 8               | 37                    | 20              |
| 389 | carbonyl reductase [NADPH] 1                                                   | 4502599          | 30         | 5               | 28                    | 20              |
| 390 | dnaJ homolog subfamily B member 11 precursor                                   | 7706495          | 41         | 9               | 27                    | 20              |
| 391 | CD59 glycoprotein preproprotein                                                | 187828910        | 14         | 4               | 25                    | 20              |
| 392 | cytochrome c                                                                   | 11128019         | 12         | 6               | 40                    | 20              |
| 393 | EF-hand domain-containing protein 1 isoform 1                                  | 156616292        | 74         | 7               | 15                    | 20              |
| 394 | carboxypeptidase D isoform 1 precursor                                         | 22202611         | 153        | 10              | 11                    | 20              |
| 395 | lactadherin isoform a preproprotein                                            | 167830475        | 43         | 8               | 26                    | 20              |
| 396 | testis-specific H1 histone                                                     | 32401437         | 28         | 4               | 17                    | 20              |
| 397 | phosphoglycerate mutase 2                                                      | 50593010         | 29         | 5               | 32                    | 20              |
| 398 | ATP synthase subunit gamma, mitochondrial isoform L (liver) precursor          | 50345988         | 33         | 6               | 24                    | 20              |
| 399 | LETM1 and EF-hand domain-containing protein 1, mitochondrial precursor         | 6912482          | 83         | 8               | 15                    | 20              |
| 400 | ADP/ATP translocase 2                                                          | 156071459        | 33         | 5               | 29                    | 20              |
| 401 | beta-defensin 129 precursor                                                    | 18250304         | 20         | 5               | 30                    | 20              |
| 402 | cytoplasmic dynein 1 heavy chain 1                                             | 33350932         | 532        | 12              | 2.90                  | 20              |
| 403 | mRNA export factor                                                             | 62739173         | 41         | 7               | 18                    | 20              |
| 404 | isocitrate dehydrogenase [NAD] subunit beta, mitochondrial isoform a precursor | 28178821         | 42         | 9               | 36                    | 19              |
| 405 | L-lactate dehydrogenase A-like 6B                                              | 15082234         | 42         | 5               | 22                    | 19              |
| 406 | stomatin-like protein 2                                                        | 7305503          | 39         | 8               | 44                    | 19              |
| 407 | flavin reductase (NADPH)                                                       | 4502419          | 22         | 3               | 24                    | 19              |
| 408 | isochorismatase domain-containing protein 2, mitochondrial isoform 2           | 13376007         | 24         | 5               | 48                    | 19              |
| 409 | calmin                                                                         | 19923599         | 112        | 6               | 6.80                  | 19              |
| 410 | testis-expressed protein 101 isoform 1                                         | 194018544        | 29         | 4               | 18                    | 19              |
| 411 | protein S100-A11                                                               | 5032057          | 12         | 6               | 52                    | 19              |
| 412 | cytochrome b-c1 complex subunit Rieske, mitochondrial                          | 163644321        | 30         | 7               | 29                    | 19              |
| 413 | pyruvate dehydrogenase protein X component, mitochondrial isoform 2            | 203098816        | 51         | 7               | 19                    | 19              |
| 414 | GTP-binding nuclear protein Ran                                                | 5453555          | 24         | 7               | 31                    | 19              |
| 415 | CDGSH iron-sulfur domain-containing protein 1                                  | 8923930          | 12         | 5               | 51                    | 19              |
| 416 | adenylate kinase 8                                                             | 22749187         | 55         | 9               | 22                    | 19              |
| 417 | ras GTPase-activating-like protein IQGAP1                                      | 4506787          | 189        | 8               | 6.70                  | 19              |
| 418 | brain acid soluble protein 1                                                   | 30795231         | 23         | 5               | 35                    | 19              |
| 419 | glypican-1 precursor                                                           | 167001141        | 62         | 8               | 22                    | 19              |
| 420 | uncharacterized protein C9orf24 isoform 1                                      | 21362074         | 30         | 5               | 20                    | 19              |
| 421 | prostate and testis expressed protein 1 precursor                              | 19923082         | 14         | 6               | 48                    | 19              |
| 422 | proteasome subunit beta type-4                                                 | 22538467         | 29         | 7               | 45                    | 19              |
| 423 | bifunctional aminoacyl-tRNA synthetase                                         | 62241042         | 171        | 9               | 7.30                  | 19              |
| 424 | receptor expression-enhancing protein 6                                        | 19923919         | 21         | 6               | 27                    | 19              |
| 425 | voltage-dependent anion-selective channel protein 1                            | 4507879          | 31         | 4               | 16                    | 19              |

*Contd...*



**Supplementary Table 3: Contd...**

| No. | Protein                                                                                            | Accession number | Mass (kDa) | Peptides number | Sequence coverage (%) | Spectral counts |
|-----|----------------------------------------------------------------------------------------------------|------------------|------------|-----------------|-----------------------|-----------------|
| 426 | tetratricopeptide repeat protein 25                                                                | 13899233         | 77         | 6               | 8.20                  | 18              |
| 427 | collagen alpha-1(XVIII) chain isoform 1 precursor                                                  | 110611235        | 154        | 6               | 7.00                  | 18              |
| 428 | thioredoxin-related transmembrane protein 4 precursor                                              | 40254947         | 39         | 4               | 12                    | 18              |
| 429 | eukaryotic translation initiation factor 5A-1 isoform B                                            | 219555712        | 17         | 4               | 23                    | 18              |
| 430 | enoyl-CoA delta isomerase 1, mitochondrial isoform 2 precursor                                     | 295842266        | 31         | 6               | 22                    | 18              |
| 431 | proteasome subunit beta type-7 proprotein                                                          | 4506203          | 30         | 7               | 36                    | 18              |
| 432 | rab GDP dissociation inhibitor beta isoform 1                                                      | 6598323          | 51         | 5               | 19                    | 18              |
| 433 | endoplasmic reticulum resident protein 29 isoform 1 precursor                                      | 5803013          | 29         | 7               | 39                    | 18              |
| 434 | membrane-associated progesterone receptor component 2                                              | 291621647        | 26         | 4               | 17                    | 18              |
| 435 | extracellular matrix protein 1 isoform 3 precursor                                                 | 322302700        | 64         | 7               | 15                    | 18              |
| 436 | ras-related protein Rab-27B                                                                        | 5729997          | 25         | 7               | 36                    | 18              |
| 437 | 40S ribosomal protein S3a                                                                          | 4506723          | 30         | 5               | 21                    | 18              |
| 438 | phosphoglycerate mutase 1                                                                          | 4505753          | 29         | 2               | 29                    | 18              |
| 439 | thioredoxin isoform 1                                                                              | 50592994         | 12         | 6               | 43                    | 18              |
| 440 | coiled-coil domain-containing protein 63                                                           | 22749217         | 66         | 7               | 14                    | 17              |
| 441 | sodium/potassium-transporting ATPase subunit alpha-2 proprotein                                    | 4502271          | 112        | 2               | 11                    | 17              |
| 442 | proteasome subunit alpha type-3 isoform 2                                                          | 23110939         | 28         | 6               | 31                    | 17              |
| 443 | succinyl-CoA ligase [ADP-forming] subunit beta, mitochondrial precursor                            | 11321583         | 50         | 5               | 8.20                  | 17              |
| 444 | galectin-3-binding protein precursor                                                               | 5031863          | 65         | 6               | 13                    | 17              |
| 445 | eukaryotic translation initiation factor 3 subunit F                                               | 4503519          | 38         | 5               | 17                    | 17              |
| 446 | 6-phosphogluconate dehydrogenase, decarboxylating                                                  | 40068518         | 53         | 6               | 12                    | 17              |
| 447 | complement component 1 Q subcomponent-binding protein, mitochondrial precursor                     | 4502491          | 31         | 5               | 32                    | 17              |
| 448 | long-chain-fatty-acid--CoA ligase 6 isoform e                                                      | 327412327        | 79         | 7               | 13                    | 17              |
| 449 | translin                                                                                           | 4759270          | 26         | 5               | 32                    | 17              |
| 450 | nicastrin precursor                                                                                | 24638433         | 78         | 6               | 10                    | 17              |
| 451 | NADH dehydrogenase [ubiquinone] iron-sulfur protein 6, mitochondrial precursor                     | 4758792          | 14         | 4               | 52                    | 17              |
| 452 | transmembrane and coiled-coil domain- containing protein 2                                         | 56847610         | 20         | 4               | 27                    | 17              |
| 453 | nuclear pore glycoprotein p62                                                                      | 24497605         | 53         | 4               | 12                    | 17              |
| 454 | dnaJ homolog subfamily B member 8                                                                  | 23503241         | 26         | 6               | 31                    | 17              |
| 455 | BPI fold-containing family A member 3 isoform 1 precursor                                          | 109627654        | 28         | 5               | 28                    | 17              |
| 456 | mitochondrial import receptor subunit TOM22 homolog                                                | 9910382          | 16         | 5               | 66                    | 17              |
| 457 | neutrophil defensin 3 preproprotein                                                                | 4885179          | 10         | 4               | 20                    | 17              |
| 458 | alpha-1-antitrypsin precursor                                                                      | 50363217         | 47         | 7               | 24                    | 17              |
| 459 | leukocyte surface antigen CD47 isoform 1 precursor                                                 | 4502673          | 35         | 3               | 8.70                  | 17              |
| 460 | aldose reductase                                                                                   | 4502049          | 36         | 4               | 16                    | 17              |
| 461 | signal peptidase complex subunit 3                                                                 | 11345462         | 20         | 5               | 21                    | 17              |
| 462 | NADH dehydrogenase [ubiquinone] 1 alpha subcomplex subunit 8                                       | 7657369          | 20         | 5               | 38                    | 17              |
| 463 | pyruvate dehydrogenase E1 component subunit alpha, somatic form, mitochondrial isoform 3 precursor | 291084744        | 44         | 3               | 19                    | 17              |
| 464 | FUN14 domain-containing protein 2                                                                  | 24371248         | 21         | 6               | 33                    | 16              |
| 465 | large proline-rich protein BAG6 isoform a                                                          | 149158692        | 119        | 7               | 11                    | 16              |
| 466 | 10 heat shock protein, mitochondrial                                                               | 4504523          | 11         | 7               | 63                    | 16              |
| 467 | beta-lactamase-like protein 2                                                                      | 7705793          | 33         | 5               | 22                    | 16              |
| 468 | endoplasmic reticulum resident protein 44 precursor                                                | 52487191         | 47         | 6               | 20                    | 16              |
| 469 | proteasome activator complex subunit 1 isoform 1                                                   | 5453990          | 29         | 6               | 33                    | 16              |
| 470 | uncharacterized protein C2orf57                                                                    | 284413778        | 42         | 4               | 8.60                  | 16              |
| 471 | sperm acrosome membrane-associated protein 4 precursor                                             | 19424138         | 13         | 2               | 22                    | 16              |
| 472 | ADP-ribosylation factor 4                                                                          | 4502205          | 21         | 3               | 47                    | 16              |
| 473 | NADH dehydrogenase [ubiquinone] 1 beta subcomplex subunit 10                                       | 4758774          | 21         | 5               | 30                    | 16              |
| 474 | aspartyl aminopeptidase                                                                            | 156416028        | 53         | 7               | 20                    | 16              |
| 475 | exportin-7                                                                                         | 154448892        | 124        | 8               | 8.90                  | 16              |
| 476 | tektin-5                                                                                           | 21389569         | 56         | 6               | 18                    | 16              |
| 477 | copper homeostasis protein cutC homolog                                                            | 148596990        | 29         | 6               | 41                    | 16              |
| 478 | zinc-alpha-2-glycoprotein precursor                                                                | 4502337          | 34         | 8               | 32                    | 16              |
| 479 | epididymal secretory protein E1 precursor                                                          | 5453678          | 17         | 4               | 38                    | 16              |
| 480 | gamma-glutamyltranspeptidase 1 precursor                                                           | 73915090         | 61         | 7               | 13                    | 16              |

Contd...

**Supplementary Table 3: Contd...**

| No. | Protein                                                                    | Accession number | Mass (kDa) | Peptides number | Sequence coverage (%) | Spectral counts |
|-----|----------------------------------------------------------------------------|------------------|------------|-----------------|-----------------------|-----------------|
| 481 | vesicle-associated membrane protein 3                                      | 4759300          | 11         | 5               | 41                    | 16              |
| 482 | ropporin-1-like protein                                                    | 17572807         | 26         | 6               | 30                    | 16              |
| 483 | NADH dehydrogenase [ubiquinone] flavoprotein 2, mitochondrial precursor    | 222080062        | 27         | 6               | 32                    | 16              |
| 484 | stress-induced-phosphoprotein 1                                            | 5803181          | 63         | 6               | 14                    | 16              |
| 485 | slit homolog 2 protein precursor                                           | 4759146          | 170        | 7               | 8.20                  | 16              |
| 486 | apolipoprotein A-IV precursor                                              | 71773110         | 45         | 7               | 23                    | 16              |
| 487 | regenerating islet-derived protein 3- gamma precursor                      | 38348213         | 19         | 4               | 34                    | 16              |
| 488 | UTP--glucose-1-phosphate uridylyltransferase isoform b                     | 48255968         | 56         | 6               | 14                    | 16              |
| 489 | calicin                                                                    | 169636428        | 67         | 6               | 11                    | 16              |
| 490 | protein S100-A8                                                            | 21614544         | 11         | 4               | 39                    | 15              |
| 491 | von Willebrand factor A domain- containing protein 1 isoform 1 precursor   | 40068485         | 47         | 4               | 17                    | 15              |
| 492 | adenylyl cyclase-associated protein 1                                      | 5453595          | 52         | 6               | 16                    | 15              |
| 493 | prenylcysteine oxidase 1 precursor                                         | 166795301        | 57         | 6               | 17                    | 15              |
| 494 | acrosome formation-associated factor isoform 1                             | 239582757        | 33         | 4               | 21                    | 15              |
| 495 | cathepsin F precursor                                                      | 6042196          | 53         | 5               | 8.50                  | 15              |
| 496 | dnaJ homolog subfamily B member 1                                          | 5453690          | 38         | 5               | 18                    | 15              |
| 497 | hypoxanthine-guanine phosphoribosyltransferase                             | 4504483          | 25         | 5               | 26                    | 15              |
| 498 | myosin regulatory light chain 12B                                          | 15809016         | 20         | 6               | 45                    | 15              |
| 499 | L-lactate dehydrogenase B chain                                            | 4557032          | 37         | 5               | 22                    | 15              |
| 500 | EGF-like repeat and discoidin I-like domain-containing protein 3 precursor | 31317224         | 54         | 7               | 16                    | 15              |
| 501 | protein ERGIC-53 precursor                                                 | 5031873          | 58         | 4               | 13                    | 15              |
| 502 | 26S proteasome non-ATPase regulatory subunit 12 isoform 1                  | 4506221          | 53         | 7               | 19                    | 15              |
| 503 | translin-associated protein X                                              | 5174731          | 33         | 5               | 30                    | 15              |
| 504 | nuclear migration protein nudC                                             | 5729953          | 38         | 6               | 21                    | 15              |
| 505 | glycerophosphodiester phosphodiesterase 1                                  | 7706617          | 38         | 4               | 16                    | 15              |
| 506 | UPF0468 protein C16orf80                                                   | 8392875          | 23         | 5               | 17                    | 15              |
| 507 | calmodulin-like protein 5                                                  | 223278387        | 16         | 5               | 44                    | 15              |
| 508 | 26S proteasome non-ATPase regulatory subunit 3                             | 25777612         | 61         | 7               | 11                    | 14              |
| 509 | transcription factor A, mitochondrial precursor                            | 4507401          | 29         | 5               | 21                    | 14              |
| 510 | deoxyguanosine kinase, mitochondrial isoform a precursor                   | 18426967         | 32         | 4               | 16                    | 14              |
| 511 | coiled-coil domain-containing protein 105                                  | 226492892        | 57         | 6               | 13                    | 14              |
| 512 | hornerin                                                                   | 57864582         | 282        | 4               | 2.10                  | 14              |
| 513 | membrane-associated progesterone receptor component 1                      | 5729875          | 22         | 5               | 34                    | 14              |
| 514 | T-complex protein 11 homolog isoform 1                                     | 148226214        | 57         | 7               | 26                    | 14              |
| 515 | eukaryotic translation initiation factor 3 subunit I                       | 4503513          | 37         | 6               | 28                    | 14              |
| 516 | CD177 antigen precursor                                                    | 110735433        | 46         | 5               | 17                    | 14              |
| 517 | mesencephalic astrocyte-derived neurotrophic factor precursor              | 299523086        | 21         | 5               | 24                    | 14              |
| 518 | ribonuclease inhibitor                                                     | 42822872         | 50         | 5               | 8.90                  | 14              |
| 519 | annexin A11                                                                | 22165431         | 54         | 6               | 16                    | 14              |
| 520 | testis, prostate and placenta-expressed protein isoform 2 precursor        | 154759245        | 31         | 6               | 33                    | 14              |
| 521 | ras-related protein Rab-7a                                                 | 34147513         | 23         | 4               | 23                    | 14              |
| 522 | cAMP-dependent protein kinase catalytic subunit alpha isoform 2            | 46909584         | 40         | 4               | 18                    | 13              |
| 523 | histone H1t                                                                | 20544168         | 22         | 4               | 22                    | 13              |
| 524 | NME1-NME2 protein                                                          | 66392203         | 30         | 5               | 21                    | 13              |
| 525 | kinectin isoform a                                                         | 33620775         | 156        | 8               | 7.30                  | 13              |
| 526 | cullin-3                                                                   | 4503165          | 89         | 6               | 11                    | 13              |
| 527 | serine protease 58 precursor                                               | 48255915         | 27         | 4               | 18                    | 13              |
| 528 | nidogen-1 precursor                                                        | 115298674        | 136        | 6               | 8.10                  | 13              |
| 529 | malate dehydrogenase, cytoplasmic isoform 1                                | 312283701        | 39         | 5               | 21                    | 13              |
| 530 | V-type proton ATPase catalytic subunit A                                   | 19913424         | 68         | 3               | 8.60                  | 13              |
| 531 | dnaJ homolog subfamily A member 4 isoform 2                                | 194328760        | 45         | 6               | 22                    | 13              |
| 532 | erythrocyte band 7 integral membrane protein isoform a                     | 38016911         | 32         | 6               | 30                    | 13              |
| 533 | transcription elongation factor B polypeptide 2 isoform b                  | 46276893         | 18         | 4               | 34                    | 13              |
| 534 | adenylate kinase domain-containing protein 1 isoform 1                     | 237858799        | 221        | 8               | 6.50                  | 13              |
| 535 | ubiquitin carboxyl-terminal hydrolase 7                                    | 150378533        | 128        | 5               | 7.60                  | 13              |

*Contd...*

Supplementary Table 3: Contd...

| No. | Protein                                                                        | Accession number | Mass (kDa) | Peptides number | Sequence coverage (%) | Spectral counts |
|-----|--------------------------------------------------------------------------------|------------------|------------|-----------------|-----------------------|-----------------|
| 536 | lysosome membrane protein 2 isoform 1 precursor                                | 5031631          | 54         | 3               | 11                    | 13              |
| 537 | phosphate carrier protein, mitochondrial isoform b precursor                   | 47132595         | 40         | 4               | 14                    | 13              |
| 538 | gelsolin isoform a precursor                                                   | 4504165          | 86         | 3               | 5.90                  | 13              |
| 539 | sarcoplasmic/endoplasmic reticulum calcium ATPase 2 isoform b                  | 24638454         | 115        | 6               | 8.10                  | 13              |
| 540 | ras-related protein Rab-3D                                                     | 4759000          | 24         | 3               | 26                    | 13              |
| 541 | rab GDP dissociation inhibitor alpha                                           | 4503971          | 51         | 2               | 15                    | 13              |
| 542 | 60S acidic ribosomal protein P2                                                | 4506671          | 12         | 5               | 73                    | 12              |
| 543 | kallikrein-2 isoform 1 precursor                                               | 5031829          | 29         | 3               | 17                    | 12              |
| 544 | dynactin subunit 1 isoform 1                                                   | 13259510         | 142        | 5               | 6.00                  | 12              |
| 545 | proteasome subunit beta type-3                                                 | 22538465         | 23         | 5               | 39                    | 12              |
| 546 | superoxide dismutase [Mn], mitochondrial isoform A precursor                   | 67782305         | 25         | 5               | 24                    | 12              |
| 547 | dnaJ homolog subfamily A member 2                                              | 5031741          | 46         | 5               | 20                    | 12              |
| 548 | protein NipSnap homolog 3A                                                     | 22267436         | 28         | 4               | 24                    | 12              |
| 549 | translationally-controlled tumor protein                                       | 4507669          | 20         | 4               | 47                    | 12              |
| 550 | programmed cell death protein 6                                                | 7019485          | 22         | 4               | 25                    | 12              |
| 551 | prostasin preproprotein                                                        | 4506153          | 36         | 3               | 12                    | 12              |
| 552 | EF-hand calcium-binding domain- containing protein 6 isoform a                 | 38570107         | 173        | 4               | 4.20                  | 12              |
| 553 | NADH dehydrogenase [ubiquinone] iron-sulfur protein 8, mitochondrial precursor | 4505371          | 24         | 4               | 19                    | 12              |
| 554 | endoplasmic reticulum-Golgi intermediate compartment protein 3 isoform a       | 38327615         | 44         | 6               | 16                    | 12              |
| 555 | 40S ribosomal protein S2                                                       | 15055539         | 31         | 6               | 23                    | 12              |
| 556 | glucosamine--fructose-6-phosphate aminotransferase [isomerizing] 1 isoform 1   | 347659028        | 79         | 6               | 8.30                  | 12              |
| 557 | kelch-like protein 10                                                          | 148664209        | 69         | 4               | 9.50                  | 12              |
| 558 | disintegrin and metalloproteinase domain-containing protein 7 preproprotein    | 114326453        | 86         | 6               | 10                    | 12              |
| 559 | septin-7 isoform 2                                                             | 148352329        | 51         | 4               | 14                    | 12              |
| 560 | 26S proteasome non-ATPase regulatory subunit 4                                 | 5292161          | 41         | 5               | 18                    | 12              |
| 561 | nucleoporin NUP53                                                              | 31982904         | 35         | 6               | 28                    | 12              |
| 562 | ATP synthase subunit delta, mitochondrial precursor                            | 50345991         | 17         | 2               | 14                    | 12              |
| 563 | pro-cathepsin H preproprotein                                                  | 23110955         | 37         | 3               | 11                    | 12              |
| 564 | ubiquitin carboxyl-terminal hydrolase 14 isoform b                             | 82880645         | 52         | 5               | 12                    | 12              |
| 565 | protein arginine N-methyltransferase 5 isoform a                               | 20070220         | 73         | 7               | 15                    | 12              |
| 566 | glyoxylate reductase/hydroxypyruvate reductase                                 | 6912396          | 36         | 6               | 26                    | 12              |
| 567 | arfaptin-1 isoform 1                                                           | 71040094         | 42         | 3               | 8.00                  | 12              |
| 568 | galectin-7                                                                     | 109948279        | 15         | 5               | 52                    | 12              |
| 569 | alpha-crystallin B chain                                                       | 4503057          | 20         | 4               | 26                    | 11              |
| 570 | peptidyl-prolyl cis-trans isomerase FKBP4                                      | 4503729          | 52         | 6               | 18                    | 11              |
| 571 | epididymal secretory protein E3-alpha precursor                                | 11386189         | 18         | 4               | 23                    | 11              |
| 572 | alpha-soluble NSF attachment protein                                           | 47933379         | 33         | 6               | 32                    | 11              |
| 573 | cytochrome c oxidase subunit 6B1                                               | 4502985          | 10         | 4               | 57                    | 11              |
| 574 | basigin isoform 2 precursor                                                    | 38372925         | 29         | 4               | 23                    | 11              |
| 575 | tryptophanyl-tRNA synthetase, cytoplasmic isoform b                            | 47419918         | 49         | 5               | 20                    | 11              |
| 576 | heterogeneous nuclear ribonucleoprotein M isoform a                            | 14141152         | 78         | 6               | 8.90                  | 11              |
| 577 | transmembrane emp24 domain- containing protein 7 precursor                     | 32996709         | 25         | 4               | 20                    | 11              |
| 578 | ras-related protein Ral-A precursor                                            | 33946329         | 24         | 3               | 16                    | 11              |
| 579 | interferon-inducible GTPase 5                                                  | 10257429         | 50         | 4               | 14                    | 11              |
| 580 | signal peptidase complex catalytic subunit SEC11A                              | 7657609          | 21         | 3               | 26                    | 11              |
| 581 | nucleoporin p58/p45 isoform a                                                  | 30102928         | 61         | 4               | 10                    | 11              |
| 582 | poly (rC)-binding protein 1                                                    | 222352151        | 37         | 4               | 9.30                  | 11              |
| 583 | ecto-ADP-ribosyltransferase 3 isoform a precursor                              | 194097380        | 44         | 4               | 12                    | 11              |
| 584 | stromal cell-derived factor 2-like protein 1 precursor                         | 56243533         | 24         | 4               | 29                    | 11              |
| 585 | methionyl-tRNA synthetase, cytoplasmic                                         | 14043022         | 101        | 5               | 7.00                  | 11              |
| 586 | glycogen phosphorylase, brain form                                             | 21361370         | 97         | 4               | 3.80                  | 11              |
| 587 | eukaryotic translation elongation factor 1 epsilon-1 isoform 1                 | 4758862          | 20         | 5               | 26                    | 11              |
| 588 | F-actin-capping protein subunit beta isoform 1                                 | 4826659          | 31         | 3               | 16                    | 11              |
| 589 | cystatin-B                                                                     | 4503117          | 11         | 4               | 55                    | 11              |
| 590 | dnaJ homolog subfamily B member 6 isoform b                                    | 4885495          | 27         | 3               | 20                    | 11              |

Contd...

**Supplementary Table 3: Contd...**

| No. | Protein                                                                        | Accession number | Mass (kDa) | Peptides number | Sequence coverage (%) | Spectral counts |
|-----|--------------------------------------------------------------------------------|------------------|------------|-----------------|-----------------------|-----------------|
| 591 | brain protein 44-like protein 2                                                | 306922396        | 15         | 4               | 42                    | 11              |
| 592 | 26S proteasome non-ATPase regulatory subunit 6                                 | 7661914          | 46         | 5               | 17                    | 11              |
| 593 | protein FAM71A                                                                 | 282721094        | 63         | 4               | 7.10                  | 11              |
| 594 | V-type proton ATPase subunit B, brain isoform                                  | 19913428         | 57         | 4               | 14                    | 11              |
| 595 | isovaleryl-CoA dehydrogenase, mitochondrial isoform 1 precursor                | 226958412        | 47         | 5               | 21                    | 11              |
| 596 | ATP-citrate synthase isoform 1                                                 | 38569421         | 121        | 8               | 3.60                  | 11              |
| 597 | nucleosome assembly protein 1-like 4                                           | 5174613          | 43         | 4               | 15                    | 11              |
| 598 | mitochondrial dicarboxylate carrier                                            | 20149598         | 31         | 3               | 15                    | 11              |
| 599 | tubulin polymerization-promoting protein family member 2                       | 226491350        | 19         | 4               | 44                    | 11              |
| 600 | probable inactive serine protease 37 isoform 1 precursor                       | 285394164        | 26         | 4               | 21                    | 11              |
| 601 | coiled-coil domain-containing protein 151                                      | 117553613        | 69         | 6               | 14                    | 11              |
| 602 | UPF0556 protein C19orf10 precursor                                             | 33457348         | 19         | 4               | 27                    | 11              |
| 603 | prelamin-A/C isoform 2                                                         | 5031875          | 65         | 4               | 9.40                  | 11              |
| 604 | F-actin-capping protein subunit alpha-2                                        | 5453599          | 33         | 2               | 15                    | 11              |
| 605 | anterior gradient protein 2 homolog precursor                                  | 5453541          | 20         | 4               | 30                    | 10              |
| 606 | DPY30 domain-containing protein 1                                              | 20270377         | 21         | 5               | 33                    | 10              |
| 607 | ras-related protein Rab-1B                                                     | 13569962         | 22         | 4               | 29                    | 10              |
| 608 | ras-related protein Rab-3B                                                     | 19923750         | 25         | 4               | 21                    | 10              |
| 609 | proteasome subunit beta type-6                                                 | 23110925         | 25         | 4               | 17                    | 10              |
| 610 | adenylate kinase 2, mitochondrial isoform a                                    | 4502013          | 26         | 5               | 29                    | 10              |
| 611 | serine/threonine-protein phosphatase PP1-beta catalytic subunit isoform 1      | 4506005          | 37         | 3               | 11                    | 10              |
| 612 | glycodelin precursor                                                           | 65507501         | 21         | 3               | 24                    | 10              |
| 613 | transmembrane protein 89 precursor                                             | 56847630         | 18         | 3               | 17                    | 10              |
| 614 | histone H2A-Bbd type 2/3                                                       | 63029935         | 13         | 4               | 57                    | 10              |
| 615 | casein kinase II subunit alpha isoform a                                       | 29570791         | 45         | 4               | 17                    | 10              |
| 616 | metalloproteinase inhibitor 1 precursor                                        | 4507509          | 23         | 5               | 32                    | 10              |
| 617 | speriolin isoform 1                                                            | 197276668        | 62         | 4               | 9.80                  | 10              |
| 618 | ATP synthase subunit g, mitochondrial                                          | 51479156         | 11         | 4               | 43                    | 10              |
| 619 | sortilin isoform 1 preproprotein                                               | 17149834         | 92         | 4               | 6.00                  | 10              |
| 620 | UBX domain-containing protein 11 isoform 1                                     | 116734681        | 54         | 4               | 16                    | 10              |
| 621 | fragile X mental retardation 1 neighbor protein                                | 22749199         | 29         | 2               | 12                    | 10              |
| 622 | 40S ribosomal protein S8                                                       | 4506743          | 24         | 4               | 18                    | 10              |
| 623 | A disintegrin and metalloproteinase with thrombospondin motifs 1 preproprotein | 50845384         | 105        | 4               | 6.80                  | 10              |
| 624 | 3-ketoacyl-CoA thiolase, mitochondrial                                         | 167614485        | 42         | 4               | 17                    | 10              |
| 625 | diablo homolog, mitochondrial isoform 1 precursor                              | 9845297          | 27         | 4               | 24                    | 10              |
| 626 | 40S ribosomal protein S3                                                       | 15718687         | 27         | 4               | 19                    | 10              |
| 627 | calpain-1 catalytic subunit                                                    | 311893363        | 82         | 5               | 7.10                  | 10              |
| 628 | ADP-ribosyl cyclase 1                                                          | 38454326         | 34         | 2               | 7.70                  | 10              |
| 629 | myotrophin                                                                     | 21956645         | 13         | 3               | 31                    | 10              |
| 630 | transmembrane emp24 domain- containing protein 2 precursor                     | 5803149          | 23         | 2               | 18                    | 10              |
| 631 | proteasome activator complex subunit 4                                         | 163644283        | 211        | 6               | 4.90                  | 10              |
| 632 | UPF0740 protein C1orf192                                                       | 63029930         | 19         | 3               | 22                    | 10              |
| 633 | matrilin-2 isoform a precursor                                                 | 62548860         | 107        | 4               | 6.00                  | 10              |
| 634 | 72 type IV collagenase isoform a preproprotein                                 | 11342666         | 74         | 2               | 4.70                  | 10              |
| 635 | glutathione S-transferase Mu 1 isoform 1                                       | 23065544         | 26         | 3               | 19                    | 10              |
| 636 | cathepsin D preproprotein                                                      | 4503143          | 45         | 4               | 14                    | 10              |
| 637 | profilin-2 isoform a                                                           | 16753215         | 15         | 4               | 26                    | 10              |
| 638 | aquaporin-5                                                                    | 4502183          | 28         | 2               | 9.80                  | 10              |
| 639 | ubiquitin-conjugating enzyme E2 N                                              | 4507793          | 17         | 3               | 24                    | 10              |
| 640 | cystatin-C precursor                                                           | 4503107          | 16         | 3               | 19                    | 10              |
| 641 | general vesicular transport factor p115                                        | 4505541          | 108        | 5               | 6.90                  | 9               |
| 642 | ribonuclease-like protein 13 precursor                                         | 59276062         | 18         | 2               | 13                    | 9               |
| 643 | serine/threonine-protein phosphatase with EF-hands 1 isoform 1b                | 23312374         | 73         | 3               | 8.20                  | 9               |
| 644 | transcription elongation factor B polypeptide 1 isoform a                      | 325652033        | 12         | 3               | 41                    | 9               |
| 645 | serine/threonine-protein phosphatase PGAM5, mitochondrial isoform 1            | 281604136        | 32         | 3               | 12                    | 9               |

Contd...

Supplementary Table 3: Contd...

| No. | Protein                                                                      | Accession number | Mass (kDa) | Peptides number | Sequence coverage (%) | Spectral counts |
|-----|------------------------------------------------------------------------------|------------------|------------|-----------------|-----------------------|-----------------|
| 646 | aspartate aminotransferase, cytoplasmic                                      | 4504067          | 46         | 4               | 17                    | 9               |
| 647 | receptor expression-enhancing protein 5                                      | 115430112        | 21         | 4               | 20                    | 9               |
| 648 | ATPase inhibitor, mitochondrial isoform 1 precursor                          | 7705927          | 12         | 3               | 15                    | 9               |
| 649 | retinoid-inducible serine carboxypeptidase precursor                         | 11055992         | 51         | 3               | 8.80                  | 9               |
| 650 | histidine triad nucleotide-binding protein 2, mitochondrial precursor        | 14211923         | 17         | 3               | 28                    | 9               |
| 651 | COP9 signalosome complex subunit 4                                           | 38373690         | 46         | 4               | 12                    | 9               |
| 652 | C-Myc-binding protein                                                        | 57242777         | 12         | 3               | 39                    | 9               |
| 653 | tomoregulin-2 precursor                                                      | 12383051         | 41         | 3               | 8.00                  | 9               |
| 654 | 45 calcium-binding protein isoform 2 precursor                               | 18699732         | 42         | 4               | 17                    | 9               |
| 655 | cytochrome b-c1 complex subunit 6, mitochondrial                             | 83627705         | 11         | 4               | 56                    | 9               |
| 656 | sulfatase-modifying factor 2 isoform e precursor                             | 194248090        | 39         | 3               | 11                    | 9               |
| 657 | ras-related protein Rab-5C isoform a                                         | 41393614         | 23         | 4               | 26                    | 9               |
| 658 | actin-related protein M1                                                     | 221139714        | 41         | 4               | 19                    | 9               |
| 659 | serine/threonine-protein phosphatase 2A catalytic subunit alpha isoform      | 4506017          | 36         | 3               | 17                    | 9               |
| 660 | casein kinase II subunit beta                                                | 23503295         | 25         | 5               | 25                    | 9               |
| 661 | bifunctional ATP-dependent dihydroxyacetone kinase/FAD-AMP lyase (cyclizing) | 20149621         | 59         | 3               | 8.30                  | 9               |
| 662 | uncharacterized protein C9orf171                                             | 46409466         | 36         | 3               | 11                    | 9               |
| 663 | 60S ribosomal protein L12                                                    | 4506597          | 18         | 3               | 25                    | 9               |
| 664 | prenylated Rab acceptor protein 1                                            | 222144309        | 21         | 3               | 18                    | 9               |
| 665 | inositol monophosphatase 1 isoform 2                                         | 221625487        | 37         | 4               | 18                    | 9               |
| 666 | apolipoprotein D precursor                                                   | 4502163          | 21         | 4               | 23                    | 9               |
| 667 | 60S ribosomal protein L7a                                                    | 4506661          | 30         | 3               | 15                    | 9               |
| 668 | cytochrome c oxidase subunit 7A2, mitochondrial precursor                    | 262118227        | 13         | 3               | 22                    | 9               |
| 669 | dynein light chain 1, axonemal isoform 1                                     | 164607156        | 22         | 3               | 18                    | 9               |
| 670 | EF-hand calcium-binding domain- containing protein 1 isoform a               | 13375787         | 24         | 3               | 23                    | 9               |
| 671 | BAG family molecular chaperone regulator 5 isoform b                         | 6631077          | 51         | 4               | 13                    | 9               |
| 672 | HD domain-containing protein 2                                               | 116875826        | 23         | 5               | 30                    | 9               |
| 673 | dihydropteridine reductase                                                   | 208973246        | 26         | 4               | 27                    | 9               |
| 674 | PREDICTED: hypothetical protein LOC728597                                    | 341914388        | 72         | 3               | 4.90                  | 9               |
| 675 | thioredoxin domain-containing protein 2 isoform 2                            | 148727319        | 60         | 3               | 4.90                  | 9               |
| 676 | trafficking protein particle complex subunit 3                               | 7656926          | 20         | 3               | 17                    | 9               |
| 677 | syntaxin-12                                                                  | 28933465         | 32         | 5               | 33                    | 9               |
| 678 | complement decay-accelerating factor isoform 2 precursor                     | 168693643        | 49         | 5               | 15                    | 9               |
| 679 | cystatin-S precursor                                                         | 4503109          | 16         | 3               | 26                    | 9               |
| 680 | eukaryotic translation initiation factor 6 isoform a                         | 4504771          | 27         | 3               | 23                    | 9               |
| 681 | mammaglobin-B precursor                                                      | 4505171          | 11         | 3               | 40                    | 9               |
| 682 | keratin, type I cytoskeletal 18                                              | 4557888          | 48         | 2               | 11                    | 8               |
| 683 | F-actin-capping protein subunit alpha-1                                      | 5453597          | 33         | 3               | 14                    | 8               |
| 684 | lysozyme-like protein 4 precursor                                            | 21389465         | 16         | 3               | 23                    | 8               |
| 685 | thioredoxin reductase 2, mitochondrial precursor                             | 22035672         | 57         | 4               | 15                    | 8               |
| 686 | heme-binding protein 2                                                       | 7657603          | 23         | 5               | 24                    | 8               |
| 687 | cadherin-1 preproprotein                                                     | 4757960          | 97         | 4               | 8.60                  | 8               |
| 688 | serine/threonine-protein phosphatase 2A activator isoform b                  | 29725611         | 37         | 3               | 17                    | 8               |
| 689 | 40S ribosomal protein S9                                                     | 14141193         | 23         | 4               | 16                    | 8               |
| 690 | superoxide dismutase [Cu-Zn]                                                 | 4507149          | 16         | 3               | 21                    | 8               |
| 691 | aspartyl-tRNA synthetase, cytoplasmic                                        | 45439306         | 57         | 5               | 13                    | 8               |
| 692 | mitochondrial import receptor subunit TOM34                                  | 21361356         | 35         | 3               | 14                    | 8               |
| 693 | tropomyosin alpha-3 chain isoform 2                                          | 24119203         | 29         | 3               | 17                    | 8               |
| 694 | ran-specific GTPase-activating protein                                       | 4506407          | 23         | 3               | 15                    | 8               |
| 695 | peptidyl-prolyl cis-trans isomerase F, mitochondrial precursor               | 5031987          | 22         | 3               | 21                    | 8               |
| 696 | lipase member I                                                              | 39752679         | 55         | 3               | 6.70                  | 8               |
| 697 | ras-related protein Rab-6A isoform b                                         | 38679888         | 24         | 3               | 16                    | 8               |
| 698 | glycyl-tRNA synthetase precursor                                             | 116805340        | 83         | 4               | 8.40                  | 8               |
| 699 | transmembrane protein 205                                                    | 63055043         | 21         | 2               | 16                    | 8               |
| 700 | uncharacterized protein C9orf135                                             | 58219541         | 26         | 4               | 25                    | 8               |

Contd...

**Supplementary Table 3: Contd...**

| No. | Protein                                                                       | Accession number | Mass (kDa) | Peptides number | Sequence coverage (%) | Spectral counts |
|-----|-------------------------------------------------------------------------------|------------------|------------|-----------------|-----------------------|-----------------|
| 701 | 60S ribosomal protein L7                                                      | 15431301         | 29         | 4               | 23                    | 8               |
| 702 | ras-related protein Rab-5B isoform 1                                          | 354725902        | 24         | 2               | 18                    | 8               |
| 703 | non-specific lipid-transfer protein isoform 1 proprotein                      | 19923233         | 59         | 4               | 7.30                  | 8               |
| 704 | beta-microseminoprotein isoform a precursor                                   | 4557036          | 13         | 4               | 21                    | 8               |
| 705 | spermatogenesis-associated protein 19, mitochondrial precursor                | 28376652         | 19         | 3               | 24                    | 8               |
| 706 | proteasome activator complex subunit 2                                        | 30410792         | 27         | 4               | 23                    | 8               |
| 707 | S-phase kinase-associated protein 1 isoform b                                 | 25777713         | 19         | 4               | 30                    | 8               |
| 708 | carnitine O-palmitoyltransferase 1, muscle isoform isoform a                  | 223468678        | 88         | 3               | 5.10                  | 8               |
| 709 | nucleoside diphosphate kinase 7 isoform a                                     | 7019465          | 42         | 3               | 11                    | 8               |
| 710 | calcium-binding mitochondrial carrier protein Aralar1                         | 21361103         | 75         | 3               | 6.00                  | 8               |
| 711 | thiamine-triphosphatase                                                       | 13236577         | 26         | 3               | 18                    | 8               |
| 712 | carboxylesterase 5A isoform 1 precursor                                       | 219521907        | 64         | 3               | 7.50                  | 8               |
| 713 | DNA damage-binding protein 1                                                  | 148529014        | 127        | 6               | 8.50                  | 8               |
| 714 | GTP-binding protein SAR1a                                                     | 217416369        | 22         | 4               | 27                    | 8               |
| 715 | dolichyl-diphosphooligosaccharide-- protein glycosyltransferase subunit STT3A | 22749415         | 81         | 4               | 5.50                  | 8               |
| 716 | junction plakoglobin                                                          | 12056468         | 82         | 5               | 8.70                  | 8               |
| 717 | myosin light chain 6B                                                         | 313851001        | 23         | 2               | 18                    | 8               |
| 718 | nucleotide exchange factor SIL1 precursor                                     | 11968009         | 52         | 3               | 7.80                  | 7               |
| 719 | myeloperoxidase precursor                                                     | 4557759          | 84         | 4               | 6.80                  | 7               |
| 720 | histidine triad nucleotide-binding protein 1                                  | 4885413          | 14         | 3               | 33                    | 7               |
| 721 | acid ceramidase isoform b                                                     | 189011546        | 47         | 3               | 11                    | 7               |
| 722 | actin-like protein 7A                                                         | 5729720          | 49         | 4               | 15                    | 7               |
| 723 | atlastin-3                                                                    | 45827806         | 61         | 3               | 11                    | 7               |
| 724 | annexin A7 isoform 1                                                          | 4502111          | 50         | 3               | 8.20                  | 7               |
| 725 | 3-mercaptopyruvate sulfurtransferase isoform 2                                | 61835204         | 33         | 3               | 19                    | 7               |
| 726 | leucine-rich repeat-containing protein 23 isoform a                           | 42542396         | 40         | 3               | 16                    | 7               |
| 727 | importin-4                                                                    | 62460637         | 119        | 4               | 5.90                  | 7               |
| 728 | Sjoegren syndrome nuclear autoantigen 1                                       | 189571687        | 14         | 3               | 26                    | 7               |
| 729 | nucleophosmin isoform 1                                                       | 10835063         | 33         | 3               | 19                    | 7               |
| 730 | gamma-glutamyl hydrolase precursor                                            | 4503987          | 36         | 3               | 11                    | 7               |
| 731 | fumarylacetoacetate hydrolase domain- containing protein 2B                   | 40786394         | 35         | 3               | 17                    | 7               |
| 732 | sperm-associated antigen 16 protein isoform 1                                 | 70909324         | 71         | 4               | 11                    | 7               |
| 733 | dipeptidase 1 precursor                                                       | 4758190          | 46         | 3               | 13                    | 7               |
| 734 | heterogeneous nuclear ribonucleoprotein K isoform b                           | 14165435         | 51         | 3               | 11                    | 7               |
| 735 | SPARC-related modular calcium-binding protein 2 isoform 1 precursor           | 24308277         | 51         | 5               | 19                    | 7               |
| 736 | protein DPCD                                                                  | 39930355         | 23         | 3               | 14                    | 7               |
| 737 | ubiquitin-conjugating enzyme E2 L3                                            | 4507789          | 18         | 3               | 30                    | 7               |
| 738 | endoplasmic reticulum lectin 1 isoform 2 precursor                            | 188528696        | 52         | 3               | 8.10                  | 7               |
| 739 | protein FAM3B isoform a precursor                                             | 46255030         | 26         | 3               | 16                    | 7               |
| 740 | coiled-coil domain-containing protein 42A isoform 1                           | 226494053        | 38         | 3               | 15                    | 7               |
| 741 | elongation factor 1-beta                                                      | 4503477          | 25         | 2               | 27                    | 7               |
| 742 | retinal dehydrogenase 1                                                       | 21361176         | 55         | 3               | 9.00                  | 7               |
| 743 | 60S ribosomal protein L23                                                     | 4506605          | 15         | 3               | 27                    | 7               |
| 744 | spermatid-associated protein                                                  | 22749425         | 52         | 3               | 7.10                  | 7               |
| 745 | multifunctional protein ADE2 isoform 2                                        | 5453539          | 47         | 3               | 11                    | 7               |
| 746 | perilipin-3 isoform 1                                                         | 255958282        | 47         | 3               | 9.90                  | 7               |
| 747 | quinone oxidoreductase isoform a                                              | 13236495         | 35         | 3               | 11                    | 7               |
| 748 | CMT1A duplicated region transcript 15 protein                                 | 56090618         | 21         | 3               | 32                    | 7               |
| 749 | ras-related protein Rab-18                                                    | 10880989         | 23         | 3               | 17                    | 7               |
| 750 | transthyretin precursor                                                       | 4507725          | 16         | 3               | 31                    | 6               |
| 751 | lactoylglutathione lyase                                                      | 118402586        | 21         | 3               | 13                    | 6               |
| 752 | 26S proteasome non-ATPase regulatory subunit 8                                | 156631005        | 40         | 4               | 12                    | 6               |
| 753 | 40S ribosomal protein SA                                                      | 59859885         | 33         | 2               | 10                    | 6               |
| 754 | acyl-CoA-binding protein isoform 5                                            | 295842514        | 14         | 2               | 28                    | 6               |
| 755 | 3-hydroxyacyl-CoA dehydrogenase type-2 isoform 1                              | 4758504          | 27         | 2               | 15                    | 6               |

*Contd...*

**Supplementary Table 3: Contd...**

| No. | Protein                                                                            | Gel 2            |            |                 |                       |                 |
|-----|------------------------------------------------------------------------------------|------------------|------------|-----------------|-----------------------|-----------------|
|     |                                                                                    | Accession number | Mass (kDa) | Peptides number | Sequence coverage (%) | Spectral counts |
| 756 | translocon-associated protein subunit alpha precursor                              | 169404009        | 32         | 3               | 12                    | 6               |
| 757 | 40S ribosomal protein S18                                                          | 11968182         | 18         | 2               | 13                    | 6               |
| 758 | 40S ribosomal protein S16                                                          | 4506691          | 16         | 3               | 21                    | 6               |
| 759 | dnaJ homolog subfamily B member 13                                                 | 39204547         | 36         | 2               | 9.80                  | 6               |
| 760 | cytochrome c oxidase subunit 6C proprotein                                         | 4758040          | 9          | 2               | 28                    | 6               |
| 761 | izumo sperm-egg fusion protein 2 precursor                                         | 63999117         | 25         | 2               | 11                    | 6               |
| 762 | acylamino-acid-releasing enzyme                                                    | 23510451         | 81         | 3               | 7.00                  | 6               |
| 763 | serine/threonine-protein phosphatase 2A 65 regulatory subunit A alpha isoform      | 21361399         | 65         | 4               | 8.70                  | 6               |
| 764 | uncharacterized protein C6orf81                                                    | 31542280         | 41         | 2               | 7.60                  | 6               |
| 765 | acyl-coenzyme A thioesterase 13 isoform 2                                          | 231567183        | 12         | 2               | 26                    | 6               |
| 766 | dynein light chain roadblock-type 2                                                | 18702323         | 11         | 2               | 34                    | 6               |
| 767 | purine nucleoside phosphorylase                                                    | 157168362        | 32         | 3               | 13                    | 6               |
| 768 | acyl carrier protein, mitochondrial precursor                                      | 4826852          | 17         | 2               | 12                    | 6               |
| 769 | ubiquitin thioesterase OTUB1                                                       | 109148508        | 31         | 2               | 7.00                  | 6               |
| 770 | NADH dehydrogenase [ubiquinone] 1 beta subcomplex subunit 7                        | 10764847         | 16         | 3               | 20                    | 6               |
| 771 | dynein heavy chain 7, axonemal                                                     | 151301127        | 461        | 2               | 0.84                  | 6               |
| 772 | ubiquitin thioesterase OTUB2                                                       | 12962939         | 27         | 2               | 9.00                  | 6               |
| 773 | midkine precursor                                                                  | 4505135          | 16         | 2               | 12                    | 6               |
| 774 | spondin-2 precursor                                                                | 6912682          | 36         | 2               | 5.10                  | 6               |
| 775 | vitronectin precursor                                                              | 88853069         | 54         | 2               | 5.20                  | 6               |
| 776 | aflatoxin B1 aldehyde reductase member 2                                           | 41327764         | 40         | 2               | 8.60                  | 6               |
| 777 | translocon-associated protein subunit delta isoform 3 precursor                    | 325301078        | 20         | 2               | 13                    | 6               |
| 778 | apolipoprotein O precursor                                                         | 13129148         | 22         | 2               | 11                    | 6               |
| 779 | ferritin heavy chain                                                               | 56682959         | 21         | 2               | 9.80                  | 6               |
| 780 | puromycin-sensitive aminopeptidase                                                 | 158937236        | 103        | 4               | 2.60                  | 6               |
| 781 | thioredoxin domain-containing protein 17                                           | 14249348         | 14         | 3               | 27                    | 6               |
| 782 | voltage-dependent calcium channel subunit alpha-2/delta-2 isoform c                | 291290994        | 130        | 4               | 5.00                  | 6               |
| 783 | UPF0577 protein KIAA1324 precursor                                                 | 38569482         | 111        | 4               | 4.00                  | 6               |
| 784 | homogentisate 1,2-dioxygenase                                                      | 115527117        | 50         | 2               | 8.10                  | 6               |
| 785 | transketolase-like protein 1 isoform b                                             | 225637461        | 65         | 2               | 5.10                  | 6               |
| 786 | ATP synthase subunit epsilon, mitochondrial                                        | 5901896          | 6          | 3               | 45                    | 6               |
| 787 | protein FAM162A                                                                    | 49355721         | 17         | 2               | 20                    | 6               |
| 788 | thiosulfate sulfurtransferase/rhodanese-like domain-containing protein 1 isoform 1 | 163965377        | 13         | 2               | 20                    | 6               |
| 789 | high mobility group protein B2 .                                                   | 194688133        | 24         | 3               | 19                    | 6               |
| 790 | 60S ribosomal protein L11 isoform 1                                                | 15431290         | 20         | 2               | 13                    | 6               |
| 791 | transketolase-like protein 2                                                       | 133778974        | 68         | 2               | 5.60                  | 6               |
| 792 | prostate and testis expressed protein 2 precursor                                  | 47086459         | 13         | 2               | 27                    | 6               |
| 793 | NADH dehydrogenase [ubiquinone] iron-sulfur protein 4, mitochondrial precursor     | 4505369          | 20         | 2               | 14                    | 6               |
| 794 | agouti-related protein precursor                                                   | 4501995          | 14         | 2               | 14                    | 6               |
| 795 | dolichyl-diphosphooligosaccharide-- protein glycosyltransferase subunit DAD1       | 4503253          | 12         | 2               | 19                    | 6               |
| 796 | V-type proton ATPase subunit d 1                                                   | 19913432         | 40         | 2               | 6.80                  | 6               |
| 797 | V-type proton ATPase subunit E 1 isoform a                                         | 4502317          | 26         | 2               | 12                    | 6               |
| 798 | ADP-ribosylation factor-like protein 8B                                            | 8922601          | 22         | 2               | 18                    | 6               |
| 799 | uncharacterized protein C22orf43                                                   | 56118955         | 25         | 2               | 9.60                  | 6               |
| 800 | titin isoform N2-A                                                                 | 291045225        | 3713       | 5               | 0.08                  | 6               |
| 801 | glycerol-3-phosphate dehydrogenase 1- like protein                                 | 24307999         | 38         | 4               | 6.30                  | 6               |
| 802 | lysosome-associated membrane glycoprotein 2 isoform C precursor                    | 169790833        | 45         | 2               | 4.90                  | 6               |
| 803 | sperm-associated antigen 11B isoform D preproprotein                               | 126131097        | 15         | 2               | 17                    | 6               |
| 804 | thioredoxin-dependent peroxide reductase, mitochondrial isoform b                  | 32483377         | 26         | 2               | 9.70                  | 6               |
| 805 | renin receptor precursor                                                           | 15011918         | 39         | 5               | 18                    | 6               |
| 806 | guanine nucleotide-binding protein subunit beta-2-like 1                           | 5174447          | 35         | 2               | 8.50                  | 6               |
| 807 | izumo sperm-egg fusion protein 1 precursor                                         | 194097475        | 39         | 2               | 7.70                  | 6               |
| 808 | SPRY domain-containing protein 7 isoform 1                                         | 20531765         | 22         | 3               | 15                    | 6               |
| 809 | 4F2 cell-surface antigen heavy chain isoform c                                     | 65506891         | 68         | 3               | 7.10                  | 6               |
| 810 | dynein intermediate chain 1, axonemal                                              | 6912338          | 79         | 3               | 4.00                  | 6               |

Contd...

## Supplementary Table 3: Contd...

| No. | Protein                                                                              | Accession number | Mass (kDa) | Peptides number | Sequence coverage (%) | Spectral counts |
|-----|--------------------------------------------------------------------------------------|------------------|------------|-----------------|-----------------------|-----------------|
| 811 | 60S ribosomal protein L22 proprotein                                                 | 4506613          | 15         | 2               | 19                    | 6               |
| 812 | ectonucleotide pyrophosphatase/phosphodiesterase family member 3                     | 111160296        | 100        | 4               | 7.40                  | 6               |
| 813 | UMP-CMP kinase isoform a                                                             | 7706497          | 26         | 2               | 14                    | 6               |
| 814 | growth arrest-specific protein 8                                                     | 4503917          | 56         | 4               | 14                    | 6               |
| 815 | protein AHNAK2                                                                       | 156766050        | 617        | 2               | 0.36                  | 6               |
| 816 | serine/threonine-protein phosphatase 2B catalytic subunit alpha isoform isoform 2    | 194688147        | 58         | 3               | 6.10                  | 6               |
| 817 | four and a half LIM domains protein 1 isoform 1                                      | 228480211        | 36         | 2               | 7.10                  | 6               |
| 818 | poly (rC)-binding protein 2 isoform b                                                | 14141166         | 38         | 2               | 9.70                  | 6               |
| 819 | 40S ribosomal protein S20 isoform 1                                                  | 226246671        | 16         | 3               | 19                    | 6               |
| 820 | charged multivesicular body protein 4b                                               | 28827795         | 25         | 2               | 9.40                  | 6               |
| 821 | B-cell receptor-associated protein 31 isoform a                                      | 213511508        | 35         | 2               | 6.40                  | 6               |
| 822 | protein sel-1 homolog 1 isoform 1 precursor                                          | 19923669         | 89         | 3               | 7.70                  | 6               |
| 823 | endoplasmic reticulum-Golgi intermediate compartment protein 2                       | 50959176         | 43         | 2               | 6.90                  | 6               |
| 824 | vacuolar protein sorting-associated protein 13A isoform A                            | 66346674         | 360        | 2               | 1.30                  | 6               |
| 825 | hsp90 co-chaperone Cdc37                                                             | 5901922          | 44         | 3               | 12                    | 6               |
| 826 | ubiquitin carboxyl-terminal hydrolase isozyme L1                                     | 21361091         | 25         | 3               | 18                    | 6               |
| 827 | uncharacterized protein C20orf85                                                     | 30425380         | 16         | 2               | 21                    | 6               |
| 828 | normal mucosa of esophagus-specific gene 1 protein                                   | 37694067         | 10         | 3               | 51                    | 5               |
| 829 | L-amino-acid oxidase isoform 2 precursor                                             | 27477089         | 65         | 3               | 5.80                  | 5               |
| 830 | uncharacterized protein C15orf26                                                     | 148747373        | 34         | 2               | 9.30                  | 5               |
| 831 | NADH dehydrogenase [ubiquinone] 1 alpha subcomplex subunit 5                         | 4826848          | 13         | 2               | 17                    | 5               |
| 832 | chitinase domain-containing protein 1 isoform a                                      | 218083142        | 45         | 3               | 12                    | 5               |
| 833 | coiled-coil domain-containing protein 40 isoform 1                                   | 148664197        | 130        | 3               | 3.40                  | 5               |
| 834 | platelet-activating factor acetylhydrolase precursor                                 | 270133071        | 50         | 2               | 9.80                  | 5               |
| 835 | clathrin light chain A isoform a                                                     | 4502899          | 24         | 2               | 14                    | 5               |
| 836 | 40S ribosomal protein S19                                                            | 4506695          | 16         | 3               | 21                    | 5               |
| 837 | proteasome subunit beta type-2 isoform 1                                             | 4506195          | 23         | 2               | 16                    | 5               |
| 838 | transmembrane protein 126A isoform 1                                                 | 14150017         | 22         | 2               | 15                    | 5               |
| 839 | carnitine O-acetyltransferase precursor                                              | 21618331         | 71         | 3               | 6.20                  | 5               |
| 840 | COP9 signalosome complex subunit 8 isoform 1                                         | 5729779          | 23         | 3               | 23                    | 5               |
| 841 | WD repeat-containing protein 65 isoform a                                            | 345199335        | 149        | 3               | 3.00                  | 5               |
| 842 | alcohol dehydrogenase class-3                                                        | 71565154         | 40         | 2               | 4.50                  | 5               |
| 843 | 60S ribosomal protein L18                                                            | 4506607          | 22         | 3               | 20                    | 5               |
| 844 | glutathione S-transferase omega-2 isoform 1                                          | 38016131         | 28         | 2               | 9.50                  | 5               |
| 845 | NADH dehydrogenase [ubiquinone] 1 beta subcomplex subunit 8, mitochondrial precursor | 4826854          | 22         | 2               | 15                    | 5               |
| 846 | synaptogyrin-2                                                                       | 4759202          | 25         | 2               | 8.00                  | 5               |
| 847 | ethanolamine-phosphate cytidyltransferase isoform 1                                  | 296841136        | 46         | 2               | 6.90                  | 5               |
| 848 | mannosyl-oligosaccharide glucosidase isoform 1                                       | 149999606        | 92         | 2               | 3.60                  | 5               |
| 849 | cysteine desulfurase, mitochondrial isoform a                                        | 32307132         | 50         | 3               | 7.90                  | 5               |
| 850 | UPF0587 protein C1orf123                                                             | 8923541          | 18         | 2               | 25                    | 5               |
| 851 | 6-phosphogluconolactonase                                                            | 6912586          | 28         | 2               | 16                    | 5               |
| 852 | CD63 antigen isoform A                                                               | 4502679          | 26         | 2               | 5.00                  | 5               |
| 853 | phospholipase A1 member A isoform 2 precursor                                        | 332688256        | 48         | 2               | 8.20                  | 5               |
| 854 | coiled-coil-helix-coiled-coil-helix domain-containing protein 6                      | 14150134         | 26         | 2               | 15                    | 5               |
| 855 | mitochondrial 2-oxoglutarate/malate carrier protein isoform 1                        | 21361114         | 34         | 2               | 9.60                  | 5               |
| 856 | ras-related protein Rap-1b isoform 1 precursor                                       | 7661678          | 21         | 2               | 13                    | 5               |
| 857 | coiled-coil domain-containing protein 164                                            | 217416374        | 87         | 2               | 3.40                  | 5               |
| 858 | retinol dehydrogenase 11 isoform 1 precursor                                         | 166795268        | 35         | 2               | 8.50                  | 5               |
| 859 | protein BRICK1                                                                       | 27544939         | 9          | 3               | 44                    | 5               |
| 860 | neuropilin-1 isoform a precursor                                                     | 182508169        | 103        | 2               | 4.60                  | 5               |
| 861 | disintegrin and metalloproteinase domain-containing protein 29 preproprotein         | 73765552         | 93         | 2               | 2.90                  | 5               |
| 862 | kinesin-1 heavy chain                                                                | 4758648          | 110        | 3               | 4.20                  | 5               |
| 863 | lysozyme C precursor                                                                 | 4557894          | 17         | 2               | 13                    | 5               |
| 864 | D-dopachrome decarboxylase                                                           | 4503291          | 13         | 3               | 26                    | 5               |
| 865 | growth arrest-specific protein 6 isoform 1 precursor                                 | 4557617          | 75         | 3               | 6.80                  | 5               |

Contd...



Supplementary Table 3: Contd...

| No. | Protein                                                                                    | Gel 2            |            |                 |                       |                 |
|-----|--------------------------------------------------------------------------------------------|------------------|------------|-----------------|-----------------------|-----------------|
|     |                                                                                            | Accession number | Mass (kDa) | Peptides number | Sequence coverage (%) | Spectral counts |
| 866 | arginyl-tRNA synthetase, cytoplasmic                                                       | 15149476         | 75         | 3               | 5.80                  | 5               |
| 867 | disintegrin and metalloproteinase domain-containing protein 30 preproprotein               | 31881770         | 89         | 3               | 4.20                  | 5               |
| 868 | isoleucyl-tRNA synthetase, mitochondrial precursor                                         | 46852147         | 114        | 3               | 4.00                  | 5               |
| 869 | vesicle-associated membrane protein 8                                                      | 14043026         | 11         | 2               | 19                    | 5               |
| 870 | late cornified envelope-like proline-rich protein 1                                        | 58082087         | 11         | 2               | 42                    | 5               |
| 871 | cytochrome c oxidase subunit 7C, mitochondrial precursor                                   | 4502993          | 7          | 2               | 29                    | 5               |
| 872 | protein phosphatase 1 regulatory subunit 32 isoform 1                                      | 283046778        | 47         | 2               | 5.20                  | 5               |
| 873 | sorcin isoform b                                                                           | 38679884         | 20         | 2               | 12                    | 5               |
| 874 | elongation factor Tu, mitochondrial precursor                                              | 34147630         | 50         | 2               | 7.30                  | 5               |
| 875 | glutaredoxin-related protein 5, mitochondrial precursor                                    | 42516576         | 17         | 2               | 20                    | 5               |
| 876 | eukaryotic translation initiation factor 3 subunit K                                       | 10801345         | 25         | 2               | 13                    | 5               |
| 877 | ras-related protein Rab-5A                                                                 | 19923262         | 24         | 2               | 17                    | 5               |
| 878 | zymogen granule protein 16 homolog B precursor                                             | 94536866         | 23         | 2               | 12                    | 4               |
| 879 | NAD-dependent malic enzyme, mitochondrial isoform 1 precursor [Homo                        | 4505145          | 65         | 2               | 4.30                  | 4               |
| 880 | apoptosis-inducing factor 1, mitochondrial isoform 2 precursor                             | 22202629         | 66         | 3               | 5.30                  | 4               |
| 881 | heat shock 70 protein 4                                                                    | 38327039         | 94         | 3               | 4.40                  | 4               |
| 882 | dynein light chain Tctex-type 1                                                            | 5730085          | 12         | 3               | 39                    | 4               |
| 883 | metalloproteinase inhibitor 3 precursor                                                    | 4507513          | 24         | 2               | 11                    | 4               |
| 884 | 40S ribosomal protein S17                                                                  | 4506693          | 16         | 3               | 43                    | 4               |
| 885 | NADH dehydrogenase [ubiquinone] 1 alpha subcomplex subunit 2 isoform 1                     | 4505355          | 11         | 2               | 31                    | 4               |
| 886 | 40S ribosomal protein S15a                                                                 | 71772415         | 15         | 2               | 13                    | 4               |
| 887 | protein TSC21                                                                              | 22749357         | 21         | 2               | 18                    | 4               |
| 888 | dnaJ homolog subfamily C member 3 precursor                                                | 5453980          | 58         | 2               | 8.10                  | 4               |
| 889 | nuclear pore complex protein Nup205                                                        | 57634534         | 228        | 3               | 2.80                  | 4               |
| 890 | 3-oxoacyl-[acyl-carrier-protein] synthase, mitochondrial isoform 1                         | 8923559          | 49         | 2               | 9.80                  | 4               |
| 891 | nucleosome assembly protein 1-like 1                                                       | 4758756          | 45         | 2               | 6.10                  | 4               |
| 892 | actin-like protein 9                                                                       | 194097462        | 46         | 2               | 7.50                  | 4               |
| 893 | deoxyuridine 5'-triphosphate nucleotidohydrolase, mitochondrial isoform 1 precursor        | 70906441         | 27         | 2               | 12                    | 4               |
| 894 | succinyl-CoA ligase [ADP/GDP-forming] subunit alpha, mitochondrial                         | 109452591        | 36         | 2               | 8.70                  | 4               |
| 895 | outer dense fiber protein 3B                                                               | 116292180        | 27         | 2               | 7.90                  | 4               |
| 896 | proactivator polypeptide isoform a preproprotein                                           | 11386147         | 58         | 3               | 12                    | 4               |
| 897 | BAG family molecular chaperone regulator 2                                                 | 4757834          | 24         | 2               | 8.50                  | 4               |
| 898 | aminoacyl tRNA synthase complex- interacting multifunctional protein 1 isoform b precursor | 215490011        | 37         | 2               | 8.60                  | 4               |
| 899 | platelet-activating factor acetylhydrolase IB subunit beta isoform a                       | 4505585          | 26         | 2               | 12                    | 4               |
| 900 | antileukoproteinase precursor                                                              | 4507065          | 14         | 2               | 15                    | 4               |
| 901 | transmembrane emp24 domain- containing protein 1 precursor                                 | 5803040          | 25         | 2               | 9.70                  | 4               |
| 902 | alpha-galactosidase A precursor                                                            | 4504009          | 49         | 2               | 7.00                  | 4               |
| 903 | iron-sulfur cluster assembly enzyme ISCU, mitochondrial isoform ISCU2 precursor            | 56699456         | 18         | 3               | 19                    | 4               |
| 904 | S-adenosylmethionine synthase isoform type-2                                               | 5174529          | 44         | 2               | 6.60                  | 4               |
| 905 | zona pellucida-binding protein 2 isoform 1 precursor                                       | 84875535         | 36         | 3               | 13                    | 4               |
| 906 | 15 selenoprotein isoform 1 precursor                                                       | 42741648         | 18         | 2               | 18                    | 4               |
| 907 | metaxin-2                                                                                  | 5729937          | 30         | 2               | 12                    | 4               |
| 908 | protein EAN57 isoform 1                                                                    | 255759947        | 31         | 2               | 6.80                  | 4               |
| 909 | NADH dehydrogenase [ubiquinone] iron-sulfur protein 5                                      | 4758790          | 13         | 2               | 14                    | 4               |
| 910 | low molecular weight phosphotyrosine protein phosphatase isoform c                         | 4757714          | 18         | 2               | 13                    | 4               |
| 911 | COP9 signalosome complex subunit 7b                                                        | 12232385         | 30         | 2               | 10                    | 4               |
| 912 | PITH domain-containing protein 1                                                           | 21361837         | 24         | 2               | 13                    | 4               |
| 913 | obscurin isoform a                                                                         | 58331253         | 722        | 2               | 0.74                  | 4               |
| 914 | myosin-VI                                                                                  | 92859701         | 149        | 2               | 1.90                  | 4               |
| 915 | carboxypeptidase M precursor                                                               | 6631081          | 51         | 2               | 3.80                  | 4               |
| 916 | filaggrin                                                                                  | 60097902         | 435        | 2               | 0.71                  | 4               |
| 917 | cell division control protein 42 homolog isoform 1                                         | 4757952          | 21         | 2               | 20                    | 4               |
| 918 | inorganic pyrophosphatase 2, mitochondrial isoform 1 precursor                             | 29171702         | 38         | 2               | 6.30                  | 4               |
| 919 | F-actin-capping protein subunit alpha-3                                                    | 15277417         | 35         | 2               | 6.70                  | 4               |
| 920 | serine protease HTRA1 precursor                                                            | 4506141          | 51         | 3               | 8.70                  | 4               |

Contd...

**Supplementary Table 3: Contd...**

| No. | Protein                                                             | Accession number | Mass (kDa) | Peptides number | Sequence coverage (%) | Spectral counts |
|-----|---------------------------------------------------------------------|------------------|------------|-----------------|-----------------------|-----------------|
| 921 | phosphoglycolate phosphatase                                        | 108796653        | 34         | 2               | 7.20                  | 4               |
| 922 | probable ergosterol biosynthetic protein 28                         | 6005719          | 16         | 2               | 17                    | 4               |
| 923 | 60S ribosomal protein L38                                           | 4506645          | 8          | 2               | 36                    | 4               |
| 924 | probable threonine protease PRSS50 precursor                        | 7019563          | 43         | 2               | 7.50                  | 4               |
| 925 | 40S ribosomal protein S27                                           | 4506711          | 9          | 2               | 25                    | 4               |
| 926 | 60S ribosomal protein L4                                            | 16579885         | 48         | 2               | 8.40                  | 4               |
| 927 | 60S ribosomal protein L3 isoform a                                  | 4506649          | 46         | 3               | 11                    | 4               |
| 928 | SUN domain-containing protein 3                                     | 71834868         | 41         | 2               | 6.20                  | 4               |
| 929 | ankyrin repeat domain-containing protein 45                         | 38348298         | 30         | 3               | 14                    | 4               |
| 930 | glutathione peroxidase 1 isoform 1                                  | 41406084         | 22         | 2               | 16                    | 4               |
| 931 | heterogeneous nuclear ribonucleoprotein U isoform a                 | 74136883         | 91         | 2               | 4.50                  | 4               |
| 932 | heterogeneous nuclear ribonucleoprotein H                           | 5031753          | 49         | 2               | 7.60                  | 4               |
| 933 | nascent polypeptide-associated complex subunit alpha isoform a      | 333033787        | 95         | 2               | 3.10                  | 4               |
| 934 | uncharacterized protein C6orf163                                    | 256600247        | 39         | 2               | 9.10                  | 4               |
| 935 | phosphatidylethanolamine-binding protein 4 precursor                | 116812622        | 26         | 2               | 22                    | 4               |
| 936 | ubiquitin domain-containing protein 1                               | 13376439         | 26         | 2               | 7.90                  | 4               |
| 937 | aladin isoform 1                                                    | 12962937         | 60         | 2               | 4.80                  | 4               |
| 938 | glycerophosphodiester phosphodiesterase domain-containing protein 1 | 260763876        | 36         | 2               | 10                    | 4               |
| 939 | long-chain-fatty-acid--CoA ligase ACSBG2                            | 83745141         | 74         | 2               | 3.50                  | 4               |
| 940 | uncharacterized protein C1orf194                                    | 171916088        | 18         | 2               | 17                    | 3               |
| 941 | heat shock 70 protein 13 precursor                                  | 48928056         | 52         | 3               | 7.40                  | 3               |
| 942 | ribose-phosphate pyrophosphokinase 2 isoform 2                      | 4506129          | 35         | 2               | 7.50                  | 3               |
| 943 | carbonic anhydrase 2                                                | 4557395          | 29         | 3               | 15                    | 3               |
| 944 | beta-defensin 126 preproprotein                                     | 13624333         | 12         | 2               | 8.10                  | 3               |
| 945 | kita-kyushu lung cancer antigen 1                                   | 63025190         | 13         | 2               | 19                    | 3               |
| 946 | left-right determination factor 1 preproprotein                     | 10337603         | 41         | 2               | 5.50                  | 3               |
| 947 | transcriptional activator protein Pur- alpha                        | 5032007          | 35         | 2               | 11                    | 3               |
| 948 | tripeptidyl-peptidase 1 preproprotein                               | 5729770          | 61         | 2               | 5.70                  | 3               |
| 949 | chloride intracellular channel protein 4                            | 7330335          | 29         | 2               | 8.70                  | 3               |
| 950 | 14 phosphohistidine phosphatase isoform 3                           | 24475861         | 14         | 2               | 29                    | 3               |
| 951 | fatty-acid amide hydrolase 1                                        | 166795287        | 63         | 2               | 9.20                  | 3               |
| 952 | protein NDRG3 isoform a                                             | 14165266         | 41         | 2               | 10                    | 3               |
| 953 | transducin beta-like protein 2 precursor                            | 7549793          | 50         | 2               | 8.30                  | 3               |
| 954 | procollagen-lysine, 2-oxoglutarate 5- dioxygenase 1 precursor       | 32307144         | 84         | 2               | 3.90                  | 3               |
| 955 | bifunctional purine biosynthesis protein PURH                       | 20127454         | 65         | 2               | 3.70                  | 3               |
| 956 | uncharacterized protein C2orf77                                     | 146260271        | 66         | 2               | 4.50                  | 3               |
| 957 | uncharacterized protein C2orf74 isoform 1                           | 221139892        | 22         | 2               | 18                    | 3               |
| 958 | lon protease homolog, mitochondrial                                 | 21396489         | 106        | 2               | 2.90                  | 3               |
| 959 | leucyl-tRNA synthetase, cytoplasmic                                 | 108773810        | 134        | 2               | 1.90                  | 3               |
| 960 | monocarboxylate transporter 1                                       | 262073007        | 54         | 2               | 6.60                  | 3               |
| 961 | transaldolase                                                       | 5803187          | 38         | 2               | 6.50                  | 3               |
| 962 | macrophage-capping protein                                          | 63252913         | 38         | 2               | 12                    | 3               |
| 963 | 40S ribosomal protein S4, X isoform X isoform                       | 4506725          | 30         | 3               | 11                    | 3               |
| 964 | arachidonate 15-lipoxygenase B isoform d                            | 85067501         | 76         | 2               | 3.70                  | 3               |
| 965 | uncharacterized protein C17orf46                                    | 149408117        | 42         | 2               | 11                    | 3               |
| 966 | cartilage acidic protein 1 isoform B precursor                      | 330688397        | 70         | 2               | 4.80                  | 3               |
| 967 | actin-related protein 3                                             | 5031573          | 47         | 3               | 11                    | 3               |
| 968 | early endosome antigen 1                                            | 55770888         | 162        | 2               | 1.90                  | 3               |
| 969 | 60S ribosomal protein L28 isoform 2                                 | 13904866         | 16         | 2               | 16                    | 3               |
| 970 | proliferation-associated protein 2G4                                | 124494254        | 44         | 2               | 5.10                  | 3               |
| 971 | polyadenylate-binding protein 1                                     | 46367787         | 71         | 2               | 3.50                  | 3               |
| 972 | cat eye syndrome critical region protein 5 isoform 2 precursor      | 14861834         | 46         | 2               | 9.70                  | 3               |
| 973 | redox-regulatory protein PAMM isoform 1 precursor                   | 344925828        | 26         | 2               | 12                    | 3               |
| 974 | beta-galactosidase isoform a preproprotein                          | 119372308        | 76         | 2               | 4.10                  | 3               |
| 975 | ERO1-like protein beta precursor                                    | 239582761        | 54         | 2               | 6.20                  | 3               |

*Contd...*

**Supplementary Table 3: Contd...**

| No.  | Protein                                                             | Accession number | Mass (kDa) | Peptides number | Sequence coverage (%) | Spectral counts |
|------|---------------------------------------------------------------------|------------------|------------|-----------------|-----------------------|-----------------|
| 976  | cleft lip and palate transmembrane protein 1                        | 4502897          | 76         | 2               | 2.50                  | 3               |
| 977  | elongation factor Ts, mitochondrial isoform 2 precursor [Homo       | 171846268        | 35         | 2               | 14                    | 3               |
| 978  | calmodulin-like protein 3                                           | 4885111          | 17         | 2               | 19                    | 3               |
| 979  | adenine phosphoribosyltransferase isoform a                         | 4502171          | 20         | 2               | 14                    | 2               |
| 980  | RPS10-NUDT3 protein                                                 | 321117084        | 33         | 2               | 6.20                  | 2               |
| 981  | profilin-3                                                          | 71274140         | 15         | 2               | 15                    | 2               |
| 982  | cytochrome b5 type B                                                | 83921614         | 17         | 2               | 21                    | 2               |
| 983  | 60S ribosomal protein L14                                           | 78000181         | 23         | 2               | 11                    | 2               |
| 984  | spectrin alpha chain, brain isoform 2                               | 154759259        | 285        | 2               | 1.20                  | 2               |
| 985  | prostate and testis expressed protein 4                             | 221554530        | 11         | 2               | 23                    | 2               |
| 986  | uncharacterized protein C7orf72                                     | 332634960        | 50         | 2               | 11                    | 2               |
| 987  | maleylacetoacetate isomerase isoform 1                              | 22202624         | 24         | 2               | 10                    | 2               |
| 988  | protein lin-7 homolog A                                             | 4759306          | 26         | 2               | 12                    | 2               |
| 989  | cysteine-rich secretory protein 2 precursor                         | 215490018        | 27         | 2               | 9.10                  | 2               |
| 990  | beta-mannosidase precursor                                          | 84798622         | 101        | 2               | 3.20                  | 2               |
| 991  | epoxide hydrolase 2                                                 | 27597073         | 63         | 2               | 3.20                  | 2               |
| 992  | alpha-1-antichymotrypsin precursor                                  | 50659080         | 48         | 2               | 6.90                  | 2               |
| 993  | WAP four-disulfide core domain protein 8 precursor                  | 153946389        | 28         | 2               | 9.10                  | 2               |
| 994  | UDP-glucose: glycoprotein glucosyltransferase 1 precursor           | 9910280          | 177        | 2               | 1.60                  | 2               |
| 995  | DDB1- and CUL4-associated factor 7                                  | 108936958        | 39         | 2               | 8.20                  | 2               |
| 996  | complement C3 precursor                                             | 115298678        | 187        | 2               | 1.30                  | 2               |
| 997  | platelet-activating factor acetylhydrolase IB subunit alpha         | 4557741          | 47         | 2               | 7.80                  | 2               |
| 998  | neurexin-1-beta isoform beta precursor                              | 21070967         | 47         | 2               | 13                    | 2               |
| 999  | pterin-4-alpha-carbinolamine dehydratase precursor                  | 4557831          | 12         | 2               | 23                    | 2               |
| 1000 | up-regulated during skeletal muscle growth protein 5                | 14249376         | 6          | 2               | 43                    | 2               |
| 1001 | rho GTPase-activating protein 23                                    | 313661470        | 162        | 2               | 1.00                  | 2               |
| 1002 | nuclear pore complex protein Nup98- Nup96 isoform 1                 | 21264365         | 196        | 2               | 1.20                  | 2               |
| 1003 | Na(+)/H(+) exchange regulatory cofactor NHE-RF1                     | 4759140          | 39         | 2               | 6.70                  | 2               |
| 1004 | calsyntenin-1 isoform 2 precursor                                   | 57242755         | 109        | 2               | 3.00                  | 2               |
| 1005 | sepiapterin reductase                                               | 4507185          | 28         | 2               | 13                    | 2               |
| 1006 | choline transporter-like protein 5 isoform B                        | 194239633        | 82         | 2               | 4.60                  | 2               |
| 1007 | SPARC-related modular calcium-binding protein 1 isoform 2 precursor | 11545873         | 48         | 2               | 5.50                  | 2               |
| 1008 | suppressor of G2 allele of SKP1 homolog isoform SGT1B [Homo         | 195963398        | 41         | 2               | 7.90                  | 2               |
| 1009 | coiled-coil domain-containing protein 113 isoform 2                 | 214830928        | 38         | 2               | 7.10                  | 2               |
| 1010 | coiled-coil domain-containing protein 114 isoform 2                 | 215599324        | 75         | 2               | 3.60                  | 2               |
