# Supplementary material for: Spermatozoa protein alterations in infertile men with bilateral varicocele
Source: PubMed Central journal article supplement — Asian J Androl. 2015 May 22;18(1):43–53. doi: 10.4103/1008-682X.153848 (PMC4736356; doi:10.4103/1008-682x.153848), 2015-05-22
Supplement: AJA-18-43_Suppl4.pdf [file AJA-18-43_Suppl4.pdf]

**Supplementary Table 4: Global proteomic profiling of fertile control group in triplicate - Third run**

| No. | Protein                                            | Accession number | Mass (kDa) | Peptides number | Sequence coverage (%) | Spectral counts |
|-----|----------------------------------------------------|------------------|------------|-----------------|-----------------------|-----------------|
| 1   | semenogelin-2 precursor                            | 4506885          | 65         | 51              | 73                    | 2028            |
| 2   | semenogelin-1 preproprotein                        | 4506883          | 52         | 63              | 76                    | 1488            |
| 3   | A-kinase anchor protein 4 isoform 2                | 21493039         | 93         | 74              | 74                    | 1149            |
| 4   | lactotransferrin isoform 1 precursor               | 54607120         | 78         | 77              | 80                    | 1128            |
| 5   | tubulin beta-4B chain                              | 5174735          | 50         | 37              | 74                    | 922             |
| 6   | heat shock-related 70 protein 2                    | 13676857         | 70         | 51              | 69                    | 805             |
| 7   | actin, cytoplasmic 1                               | 4501885          | 42         | 37              | 91                    | 788             |
| 8   | fibronectin isoform 3 preproprotein                | 16933542         | 259        | 107             | 54                    | 750             |
| 9   | tubulin alpha-3C/D chain                           | 17921993         | 50         | 38              | 76                    | 696             |
| 10  | clusterin preproprotein                            | 355594753        | 52         | 32              | 53                    | 614             |
| 11  | 78 glucose-regulated protein precursor             | 16507237         | 72         | 37              | 57                    | 572             |
| 12  | heat shock protein HSP 90-alpha isoform 1          | 153792590        | 98         | 48              | 47                    | 525             |
| 13  | A-kinase anchor protein 3                          | 21493041         | 95         | 49              | 50                    | 514             |
| 14  | heat shock cognate 71 protein isoform 1            | 5729877          | 71         | 17              | 47                    | 452             |
| 15  | ATP synthase subunit beta, mitochondrial precursor | 32189394         | 57         | 32              | 76                    | 431             |

*Contd...*

Supplementary Table 4: Contd...

| No. | Protein                                                              | Gel 3            |            |                 |                       |                 |
|-----|----------------------------------------------------------------------|------------------|------------|-----------------|-----------------------|-----------------|
|     |                                                                      | Accession number | Mass (kDa) | Peptides number | Sequence coverage (%) | Spectral counts |
| 16  | endoplasmic precursor                                                | 4507677          | 92         | 53              | 55                    | 420             |
| 17  | keratin, type II cytoskeletal 1                                      | 119395750        | 66         | 35              | 52                    | 409             |
| 18  | tubulin alpha-1A chain                                               | 17986283         | 50         | 3               | 60                    | 396             |
| 19  | prostatic acid phosphatase isoform TM-PAP precursor                  | 197116348        | 48         | 21              | 44                    | 394             |
| 20  | heat shock 70 protein 1A/1B                                          | 194248072        | 70         | 20              | 52                    | 392             |
| 21  | pyruvate kinase isozymes M1/M2 isoform c                             | 332164775        | 66         | 42              | 65                    | 390             |
| 22  | heat shock protein HSP 90-beta                                       | 20149594         | 83         | 20              | 40                    | 378             |
| 23  | heat shock 70 protein 1-like                                         | 124256496        | 70         | 27              | 53                    | 371             |
| 24  | protein disulfide-isomerase A3 precursor                             | 21361657         | 57         | 39              | 68                    | 366             |
| 25  | alpha-enolase isoform 1                                              | 4503571          | 47         | 35              | 78                    | 360             |
| 26  | prolactin-inducible protein precursor                                | 4505821          | 17         | 19              | 77                    | 354             |
| 27  | keratin, type I cytoskeletal 9                                       | 55956899         | 62         | 33              | 54                    | 297             |
| 28  | keratin, type I cytoskeletal 10                                      | 195972866        | 59         | 29              | 41                    | 294             |
| 29  | prostate-specific antigen isoform 1 preproprotein                    | 4502173          | 29         | 15              | 69                    | 285             |
| 30  | fructose-bisphosphate aldolase A isoform 2                           | 342187211        | 45         | 35              | 88                    | 279             |
| 31  | glyceraldehyde-3-phosphate dehydrogenase, testis- specific           | 7657116          | 45         | 20              | 77                    | 271             |
| 32  | triosephosphate isomerase isoform 2                                  | 226529917        | 31         | 28              | 94                    | 247             |
| 33  | pyruvate kinase isozymes M1/M2 isoform a                             | 33286418         | 58         | 2               | 69                    | 245             |
| 34  | tubulin beta chain                                                   | 29788785         | 50         | 2               | 62                    | 243             |
| 35  | keratin, type II cytoskeletal 2 epidermal                            | 47132620         | 65         | 28              | 47                    | 242             |
| 36  | outer dense fiber protein 2 isoform 3                                | 310750406        | 81         | 28              | 37                    | 242             |
| 37  | calcium-binding tyrosine phosphorylation-regulated protein isoform c | 24797112         | 41         | 21              | 61                    | 239             |
| 38  | calcium-binding tyrosine phosphorylation-regulated protein isoform a | 24797108         | 53         | 7               | 46                    | 235             |
| 39  | hypoxia up-regulated protein 1 precursor                             | 5453832          | 111        | 38              | 36                    | 230             |
| 40  | keratin, type I cytoskeletal 13 isoform a                            | 131412225        | 50         | 25              | 56                    | 225             |
| 41  | elongation factor 1-alpha 1                                          | 4503471          | 50         | 21              | 53                    | 219             |
| 42  | tubulin alpha-1C chain                                               | 14389309         | 50         | 2               | 57                    | 214             |
| 43  | ropporin-1A                                                          | 21359920         | 24         | 17              | 81                    | 206             |
| 44  | leucine-rich repeat-containing protein 37B precursor                 | 53829385         | 106        | 26              | 30                    | 206             |
| 45  | acetyl-CoA acetyltransferase, mitochondrial precursor                | 4557237          | 45         | 26              | 61                    | 201             |
| 46  | ruvB-like 2                                                          | 5730023          | 51         | 30              | 70                    | 199             |
| 47  | malate dehydrogenase, mitochondrial precursor                        | 21735621         | 36         | 19              | 68                    | 199             |
| 48  | 60 heat shock protein, mitochondrial                                 | 31542947         | 61         | 37              | 79                    | 192             |
| 49  | ATP synthase subunit alpha, mitochondrial precursor                  | 4757810          | 60         | 28              | 52                    | 188             |
| 50  | keratin, type II cytoskeletal 6A                                     | 5031839          | 60         | 14              | 41                    | 181             |
| 51  | aminopeptidase N precursor                                           | 157266300        | 110        | 42              | 43                    | 181             |
| 52  | plastin-2                                                            | 167614506        | 70         | 32              | 63                    | 179             |
| 53  | fumarate hydratase, mitochondrial                                    | 19743875         | 55         | 25              | 63                    | 172             |
| 54  | ruvB-like 1                                                          | 4506753          | 50         | 27              | 79                    | 167             |
| 55  | glutathione S-transferase Mu 3                                       | 23065552         | 27         | 19              | 75                    | 166             |
| 56  | T-complex protein 1 subunit beta isoform 1                           | 5453603          | 57         | 28              | 62                    | 163             |
| 57  | uncharacterized protein C1orf56 precursor                            | 20149646         | 37         | 16              | 49                    | 162             |
| 58  | annexin A1                                                           | 4502101          | 39         | 22              | 65                    | 161             |
| 59  | heat shock protein beta-1                                            | 4504517          | 23         | 18              | 87                    | 161             |
| 60  | cathelicidin antimicrobial peptide preproprotein                     | 348041314        | 20         | 13              | 51                    | 160             |
| 61  | annexin A5                                                           | 4502107          | 36         | 25              | 76                    | 159             |
| 62  | myosin-9                                                             | 12667788         | 227        | 52              | 29                    | 158             |
| 63  | angiotensin-converting enzyme isoform 1 precursor                    | 4503273          | 150        | 27              | 23                    | 158             |
| 64  | annexin A2 isoform 1                                                 | 50845388         | 40         | 23              | 50                    | 152             |
| 65  | acrosin-binding protein precursor                                    | 17999524         | 61         | 24              | 46                    | 150             |
| 66  | fatty acid synthase                                                  | 41872631         | 273        | 40              | 12                    | 148             |
| 67  | nuclear pore membrane glycoprotein 210-like isoform 1 precursor      | 117414168        | 211        | 50              | 32                    | 145             |
| 68  | phosphoglycerate kinase 2                                            | 31543397         | 45         | 23              | 70                    | 144             |
| 69  | leucine-rich repeat-containing protein 37A precursor                 | 289547512        | 188        | 19              | 12                    | 144             |
| 70  | zona pellucida-binding protein 1 isoform 1 precursor                 | 229577313        | 40         | 18              | 52                    | 139             |

Contd...

Supplementary Table 4: Contd...

| No. | Gel 3                                                                                |                  |            |                 |                       |                 |
|-----|--------------------------------------------------------------------------------------|------------------|------------|-----------------|-----------------------|-----------------|
|     | Protein                                                                              | Accession number | Mass (kDa) | Peptides number | Sequence coverage (%) | Spectral counts |
| 71  | tubulin beta-4A chain                                                                | 21361322         | 50         | 2               | 61                    | 139             |
| 72  | dipeptidyl peptidase 4                                                               | 18765694         | 88         | 32              | 43                    | 135             |
| 73  | transitional endoplasmic reticulum ATPase                                            | 6005942          | 89         | 32              | 43                    | 134             |
| 74  | ropporin-1B                                                                          | 59891409         | 24         | 5               | 80                    | 134             |
| 75  | keratin, type II cytoskeletal 4                                                      | 331999954        | 56         | 25              | 54                    | 131             |
| 76  | ras-related protein Rab-2A isoform a                                                 | 4506365          | 24         | 15              | 70                    | 130             |
| 77  | cytochrome b-c1 complex subunit 2, mitochondrial precursor                           | 50592988         | 48         | 19              | 50                    | 129             |
| 78  | hexokinase-1 isoform HKI-ta/tb                                                       | 15991831         | 103        | 33              | 36                    | 128             |
| 79  | aconitate hydratase, mitochondrial precursor                                         | 4501867          | 85         | 25              | 35                    | 128             |
| 80  | glyceraldehyde-3-phosphate dehydrogenase                                             | 7669492          | 36         | 18              | 59                    | 127             |
| 81  | creatine kinase B-type                                                               | 21536286         | 43         | 16              | 49                    | 126             |
| 82  | phospholipid hydroperoxide glutathione peroxidase, mitochondrial isoform A precursor | 75709200         | 22         | 16              | 63                    | 123             |
| 83  | serum albumin preproprotein                                                          | 4502027          | 69         | 27              | 47                    | 122             |
| 84  | sperm acrosome membrane-associated protein 1 precursor                               | 13569934         | 32         | 9               | 39                    | 120             |
| 85  | izumo sperm-egg fusion protein 4 isoform 1 precursor                                 | 89903025         | 24         | 9               | 50                    | 120             |
| 86  | keratin, type II cytoskeletal 5                                                      | 119395754        | 62         | 10              | 18                    | 119             |
| 87  | sorbitol dehydrogenase                                                               | 156627571        | 38         | 15              | 41                    | 119             |
| 88  | trifunctional enzyme subunit alpha, mitochondrial precursor                          | 20127408         | 83         | 24              | 38                    | 115             |
| 89  | saccharopine dehydrogenase-like oxidoreductase                                       | 55770836         | 47         | 16              | 51                    | 114             |
| 90  | T-complex protein 1 subunit theta                                                    | 48762932         | 60         | 26              | 42                    | 111             |
| 91  | tektin-3                                                                             | 13994250         | 57         | 20              | 52                    | 110             |
| 92  | tubulin beta-6 chain                                                                 | 14210536         | 50         | 4               | 20                    | 109             |
| 93  | 14-3-3 protein epsilon                                                               | 5803225          | 29         | 20              | 73                    | 109             |
| 94  | peroxiredoxin-1                                                                      | 320461711        | 22         | 13              | 58                    | 109             |
| 95  | calreticulin precursor                                                               | 4757900          | 48         | 19              | 61                    | 108             |
| 96  | pyruvate dehydrogenase E1 component subunit beta, mitochondrial isoform 1 precursor  | 156564403        | 39         | 15              | 45                    | 108             |
| 97  | sperm protein associated with the nucleus on the X chromosome C                      | 13435137         | 11         | 8               | 89                    | 108             |
| 98  | sperm protein associated with the nucleus on the X chromosome B/F                    | 22027492         | 12         | 6               | 79                    | 107             |
| 99  | cysteine-rich secretory protein 1 isoform 1 precursor                                | 327315372        | 28         | 11              | 55                    | 106             |
| 100 | trifunctional enzyme subunit beta, mitochondrial precursor                           | 4504327          | 51         | 23              | 57                    | 104             |
| 101 | beta-actin-like protein 2                                                            | 63055057         | 42         | 2               | 35                    | 104             |
| 102 | T-complex protein 1 subunit delta                                                    | 38455427         | 58         | 19              | 41                    | 102             |
| 103 | cytochrome c oxidase subunit 4 isoform 1, mitochondrial precursor                    | 4502981          | 20         | 15              | 55                    | 101             |
| 104 | 14-3-3 protein zeta/delta                                                            | 4507953          | 28         | 11              | 62                    | 100             |
| 105 | protein disulfide-isomerase precursor                                                | 20070125         | 57         | 24              | 51                    | 100             |
| 106 | elongation factor 1-gamma                                                            | 4503481          | 50         | 16              | 52                    | 99              |
| 107 | L-lactate dehydrogenase C chain                                                      | 4504973          | 36         | 17              | 49                    | 97              |
| 108 | dynein light chain 2, cytoplasmic                                                    | 18087855         | 10         | 6               | 70                    | 95              |
| 109 | T-complex protein 1 subunit gamma isoform a                                          | 63162572         | 61         | 21              | 49                    | 92              |
| 110 | cAMP-dependent protein kinase type I-alpha regulatory subunit                        | 4506063          | 43         | 13              | 40                    | 92              |
| 111 | succinate dehydrogenase [ubiquinone] flavoprotein subunit, mitochondrial             | 156416003        | 73         | 23              | 44                    | 91              |
| 112 | lipoprotein lipase precursor                                                         | 4557727          | 53         | 15              | 36                    | 91              |
| 113 | dynein light chain 1, cytoplasmic                                                    | 4505813          | 10         | 8               | 65                    | 90              |
| 114 | ubiquitin-40S ribosomal protein S27a precursor                                       | 208022622        | 18         | 4               | 30                    | 90              |
| 115 | long-chain-fatty-acid--CoA ligase 1                                                  | 40807491         | 78         | 22              | 27                    | 89              |
| 116 | T-complex protein 1 subunit epsilon                                                  | 24307939         | 60         | 22              | 56                    | 88              |
| 117 | citrate synthase, mitochondrial precursor                                            | 38327625         | 52         | 18              | 58                    | 85              |
| 118 | peroxiredoxin-6                                                                      | 4758638          | 25         | 17              | 69                    | 83              |
| 119 | clathrin heavy chain 1                                                               | 4758012          | 192        | 28              | 17                    | 82              |
| 120 | T-complex protein 1 subunit eta isoform a                                            | 5453607          | 59         | 19              | 50                    | 82              |
| 121 | dolichyl-diphosphooligosaccharide--protein glycosyltransferase subunit 1 precursor   | 4506675          | 69         | 23              | 51                    | 81              |
| 122 | serum amyloid P-component precursor                                                  | 4502133          | 25         | 9               | 34                    | 81              |
| 123 | cAMP-dependent protein kinase type II-alpha regulatory subunit                       | 4758958          | 46         | 18              | 42                    | 80              |
| 124 | tektin-2                                                                             | 16507950         | 50         | 19              | 54                    | 79              |
| 125 | erlin-2 isoform 1                                                                    | 6005721          | 38         | 14              | 52                    | 79              |

Contd...

Supplementary Table 4: Contd...

| No. | Gel 3                                                                                                              |                  |            |                 |                       |                 |
|-----|--------------------------------------------------------------------------------------------------------------------|------------------|------------|-----------------|-----------------------|-----------------|
|     | Protein                                                                                                            | Accession number | Mass (kDa) | Peptides number | Sequence coverage (%) | Spectral counts |
| 126 | valyl-tRNA synthetase                                                                                              | 5454158          | 140        | 24              | 22                    | 78              |
| 127 | protein FAM166A                                                                                                    | 48717426         | 36         | 14              | 63                    | 77              |
| 128 | 2,4-dienoyl-CoA reductase, mitochondrial precursor                                                                 | 4503301          | 36         | 12              | 50                    | 77              |
| 129 | isocitrate dehydrogenase [NADP] cytoplasmic                                                                        | 28178825         | 47         | 15              | 42                    | 77              |
| 130 | peroxiredoxin-5, mitochondrial isoform a precursor                                                                 | 6912238          | 22         | 13              | 56                    | 77              |
| 131 | neutral alpha-glucosidase AB isoform 2 precursor                                                                   | 38202257         | 107        | 19              | 18                    | 76              |
| 132 | cytosol aminopeptidase                                                                                             | 41393561         | 56         | 22              | 55                    | 76              |
| 133 | dihydrolipoyllysine-residue acetyltransferase component of pyruvate dehydrogenase complex, mitochondrial precursor | 31711992         | 69         | 13              | 28                    | 76              |
| 134 | cytosolic non-specific dipeptidase isoform 1                                                                       | 271398239        | 53         | 18              | 41                    | 76              |
| 135 | radial spoke head protein 9 homolog isoform 1                                                                      | 32964825         | 31         | 22              | 89                    | 76              |
| 136 | T-complex protein 1 subunit alpha isoform a                                                                        | 57863257         | 60         | 21              | 59                    | 75              |
| 137 | elongation factor 2                                                                                                | 4503483          | 95         | 25              | 20                    | 73              |
| 138 | laminin subunit beta-2 precursor                                                                                   | 119703755        | 196        | 24              | 17                    | 73              |
| 139 | protein disulfide-isomerase A4 precursor                                                                           | 4758304          | 73         | 17              | 30                    | 73              |
| 140 | sperm protein associated with the nucleus on the X chromosome E                                                    | 22027496         | 11         | 2               | 89                    | 73              |
| 141 | tubulin beta-3 chain isoform 1                                                                                     | 50592996         | 50         | 2               | 28                    | 72              |
| 142 | sperm equatorial segment protein 1 precursor                                                                       | 21717832         | 39         | 11              | 29                    | 72              |
| 143 | NADH-ubiquinone oxidoreductase 75 subunit, mitochondrial isoform 1                                                 | 33519475         | 79         | 13              | 21                    | 72              |
| 144 | radial spoke head protein 6 homolog A                                                                              | 13540559         | 81         | 13              | 27                    | 68              |
| 145 | adipocyte plasma membrane-associated protein                                                                       | 24308201         | 46         | 18              | 51                    | 68              |
| 146 | L-asparaginase                                                                                                     | 145275200        | 32         | 13              | 56                    | 68              |
| 147 | gastricsin isoform 1 preproprotein                                                                                 | 4505757          | 42         | 4               | 9.30                  | 67              |
| 148 | tektin-4                                                                                                           | 21389613         | 51         | 17              | 46                    | 67              |
| 149 | mitochondrial inner membrane protein isoform 3                                                                     | 154354966        | 83         | 21              | 33                    | 66              |
| 150 | calnexin precursor                                                                                                 | 10716563         | 68         | 17              | 28                    | 66              |
| 151 | vesicular integral-membrane protein VIP36 precursor                                                                | 5803023          | 40         | 11              | 47                    | 65              |
| 152 | 14-3-3 protein sigma                                                                                               | 5454052          | 28         | 11              | 58                    | 65              |
| 153 | peroxiredoxin-2 isoform a                                                                                          | 32189392         | 22         | 11              | 55                    | 65              |
| 154 | adenylate kinase isoenzyme 1                                                                                       | 4502011          | 22         | 11              | 55                    | 65              |
| 155 | 6-phosphofructokinase type C isoform 1                                                                             | 11321601         | 86         | 22              | 31                    | 64              |
| 156 | peptidyl-prolyl cis-trans isomerase A                                                                              | 10863927         | 18         | 12              | 67                    | 64              |
| 157 | cytochrome c oxidase subunit II                                                                                    | 251831110        | 26         | 8               | 48                    | 64              |
| 158 | laminin subunit alpha-5 precursor                                                                                  | 21264602         | 400        | 27              | 9.70                  | 64              |
| 159 | radial spoke head 1 homolog                                                                                        | 18254456         | 35         | 12              | 52                    | 64              |
| 160 | annexin A3                                                                                                         | 4826643          | 36         | 16              | 27                    | 64              |
| 161 | dihydrolipoyl dehydrogenase, mitochondrial precursor                                                               | 91199540         | 54         | 15              | 41                    | 63              |
| 162 | agrin precursor                                                                                                    | 54873613         | 215        | 25              | 19                    | 63              |
| 163 | ezrin                                                                                                              | 21614499         | 69         | 15              | 21                    | 62              |
| 164 | plasma serine protease inhibitor precursor                                                                         | 194018472        | 46         | 15              | 48                    | 61              |
| 165 | carnitine O-palmitoyltransferase 2, mitochondrial precursor                                                        | 4503023          | 74         | 18              | 39                    | 60              |
| 166 | 14-3-3 protein theta                                                                                               | 5803227          | 28         | 7               | 47                    | 60              |
| 167 | sperm surface protein Sp17                                                                                         | 8394343          | 17         | 11              | 74                    | 59              |
| 168 | alpha-centractin                                                                                                   | 5031569          | 43         | 13              | 60                    | 59              |
| 169 | D-3-phosphoglycerate dehydrogenase                                                                                 | 23308577         | 57         | 9               | 18                    | 59              |
| 170 | keratin, type I cytoskeletal 14                                                                                    | 15431310         | 52         | 7               | 28                    | 58              |
| 171 | histone H2B type 1-A                                                                                               | 24586679         | 14         | 6               | 41                    | 58              |
| 172 | protein disulfide-isomerase A6 precursor                                                                           | 5031973          | 48         | 13              | 32                    | 58              |
| 173 | acrosomal protein SP-10 isoform a precursor                                                                        | 4501879          | 28         | 7               | 24                    | 56              |
| 174 | dipeptidase 3 isoform a precursor                                                                                  | 193211608        | 56         | 10              | 21                    | 56              |
| 175 | elongation factor 1-delta isoform 1                                                                                | 304555581        | 71         | 8               | 15                    | 55              |
| 176 | voltage-dependent anion-selective channel protein 2 isoform 2                                                      | 296317339        | 32         | 12              | 52                    | 54              |
| 177 | erlin-1                                                                                                            | 154800487        | 39         | 7               | 35                    | 54              |
| 178 | myosin light polypeptide 6 isoform 2                                                                               | 88999583         | 17         | 8               | 53                    | 54              |
| 179 | cytochrome c oxidase subunit 5B, mitochondrial precursor                                                           | 17017988         | 14         | 12              | 43                    | 54              |
| 180 | T-complex protein 1 subunit zeta-2 isoform 1                                                                       | 58331173         | 58         | 8               | 30                    | 52              |

Contd...

**Supplementary Table 4: Contd...**

| No. | Protein                                                                                      | Gel 3            |            |                 |                       |                 |
|-----|----------------------------------------------------------------------------------------------|------------------|------------|-----------------|-----------------------|-----------------|
|     |                                                                                              | Accession number | Mass (kDa) | Peptides number | Sequence coverage (%) | Spectral counts |
| 181 | heat shock 70 protein 4L                                                                     | 31541941         | 95         | 17              | 26                    | 52              |
| 182 | epididymal sperm-binding protein 1 precursor                                                 | 301601648        | 26         | 8               | 44                    | 52              |
| 183 | ras-related protein Rab-11B                                                                  | 190358517        | 24         | 11              | 52                    | 52              |
| 184 | histone H4                                                                                   | 4504303          | 11         | 9               | 59                    | 51              |
| 185 | voltage-dependent anion-selective channel protein 3 isoform 1                                | 25188179         | 31         | 13              | 48                    | 51              |
| 186 | stress-70 protein, mitochondrial precursor                                                   | 24234688         | 74         | 13              | 26                    | 50              |
| 187 | alpha-actinin-4                                                                              | 12025678         | 105        | 16              | 23                    | 50              |
| 188 | protein phosphatase 1 regulatory subunit 7                                                   | 4506013          | 42         | 13              | 47                    | 50              |
| 189 | electron transfer flavoprotein subunit alpha, mitochondrial isoform a                        | 4503607          | 35         | 15              | 66                    | 50              |
| 190 | hydroxyacyl-coenzyme A dehydrogenase, mitochondrial isoform 1 precursor                      | 296179427        | 36         | 10              | 54                    | 50              |
| 191 | cytochrome c oxidase subunit 5A, mitochondrial precursor                                     | 190885499        | 17         | 7               | 38                    | 48              |
| 192 | succinyl-CoA: 3-ketoacid-coenzyme A transferase 1, mitochondrial precursor                   | 4557817          | 56         | 14              | 41                    | 48              |
| 193 | peroxiredoxin-4 precursor                                                                    | 5453549          | 31         | 12              | 49                    | 48              |
| 194 | acrosin precursor                                                                            | 148613878        | 46         | 14              | 39                    | 48              |
| 195 | glutathione S-transferase P                                                                  | 4504183          | 23         | 10              | 60                    | 48              |
| 196 | enoyl-CoA hydratase, mitochondrial                                                           | 194097323        | 31         | 13              | 53                    | 48              |
| 197 | beta-2-microglobulin precursor                                                               | 4757826          | 14         | 5               | 38                    | 47              |
| 198 | ATP synthase subunit b, mitochondrial precursor                                              | 21361565         | 29         | 12              | 52                    | 47              |
| 199 | hyaluronidase PH-20 isoform 2                                                                | 291290981        | 58         | 8               | 23                    | 46              |
| 200 | cytochrome b-c1 complex subunit 1, mitochondrial precursor                                   | 46593007         | 53         | 17              | 46                    | 46              |
| 201 | ATP synthase subunit d, mitochondrial isoform a                                              | 5453559          | 18         | 12              | 80                    | 46              |
| 202 | olfactomedin-4 precursor                                                                     | 32313593         | 57         | 10              | 28                    | 46              |
| 203 | uncharacterized protein KIAA1683 isoform a                                                   | 224451032        | 147        | 15              | 14                    | 46              |
| 204 | keratin, type II cytoskeletal 6B                                                             | 119703753        | 60         | 2               | 22                    | 46              |
| 205 | ferritin, mitochondrial precursor                                                            | 29126241         | 28         | 9               | 47                    | 46              |
| 206 | uncharacterized protein C9orf9                                                               | 33285006         | 19         | 10              | 79                    | 46              |
| 207 | 26S protease regulatory subunit 4                                                            | 24430151         | 49         | 10              | 20                    | 45              |
| 208 | 3-hydroxyisobutyrate dehydrogenase, mitochondrial precursor                                  | 23308751         | 35         | 8               | 30                    | 45              |
| 209 | peptidyl-prolyl cis-trans isomerase B precursor                                              | 4758950          | 24         | 10              | 55                    | 44              |
| 210 | nucleobindin-2 precursor                                                                     | 4826870          | 50         | 13              | 38                    | 44              |
| 211 | protein FAM71B                                                                               | 222418633        | 65         | 10              | 11                    | 44              |
| 212 | uncharacterized protein C20orf106 precursor                                                  | 71043622         | 20         | 8               | 60                    | 44              |
| 213 | synaptophysin-like protein 1 isoform a                                                       | 5803185          | 29         | 5               | 30                    | 44              |
| 214 | plastin-3 isoform 1                                                                          | 209862851        | 71         | 11              | 27                    | 43              |
| 215 | importin subunit beta-1                                                                      | 19923142         | 97         | 13              | 12                    | 43              |
| 216 | 60S acidic ribosomal protein P0                                                              | 16933546         | 34         | 9               | 46                    | 43              |
| 217 | nucleoside diphosphate kinase homolog 5                                                      | 4505413          | 24         | 8               | 52                    | 43              |
| 218 | annexin A6 isoform 1                                                                         | 71773329         | 76         | 15              | 25                    | 42              |
| 219 | protein-glutamine gamma-glutamyltransferase 4                                                | 156627577        | 77         | 15              | 20                    | 42              |
| 220 | myeloid leukemia factor 1 isoform 1                                                          | 11967975         | 31         | 11              | 40                    | 42              |
| 221 | T-complex protein 1 subunit zeta isoform a                                                   | 4502643          | 58         | 12              | 26                    | 41              |
| 222 | phosphoglycerate kinase 1                                                                    | 4505763          | 45         | 7               | 31                    | 41              |
| 223 | dolichyl-diphosphooligosaccharide--protein glycosyltransferase subunit 2 isoform 2 precursor | 209413738        | 68         | 15              | 43                    | 41              |
| 224 | vesicle-associated membrane protein-associated protein A isoform 2                           | 94721252         | 28         | 9               | 49                    | 41              |
| 225 | fructose-bisphosphate aldolase C                                                             | 4885063          | 39         | 2               | 21                    | 41              |
| 226 | 26S protease regulatory subunit 6A                                                           | 21361144         | 49         | 11              | 36                    | 41              |
| 227 | isocitrate dehydrogenase [NAD] subunit alpha, mitochondrial precursor                        | 5031777          | 40         | 9               | 31                    | 41              |
| 228 | axonemal dynein light intermediate polypeptide 1                                             | 37595560         | 32         | 13              | 52                    | 41              |
| 229 | 26S protease regulatory subunit 8 isoform 1                                                  | 24497435         | 46         | 9               | 27                    | 41              |
| 230 | hsc70-interacting protein                                                                    | 19923193         | 41         | 6               | 18                    | 41              |
| 231 | carbonic anhydrase 4 precursor                                                               | 4502519          | 35         | 10              | 34                    | 41              |
| 232 | protein DJ-1                                                                                 | 31543380         | 20         | 12              | 82                    | 41              |
| 233 | keratin, type I cytoskeletal 16                                                              | 24430192         | 51         | 5               | 30                    | 40              |
| 234 | glutamine synthetase                                                                         | 19923206         | 42         | 7               | 22                    | 40              |
| 235 | L-lactate dehydrogenase A chain isoform 3                                                    | 260099723        | 40         | 10              | 37                    | 40              |

Contd...

Supplementary Table 4: Contd...

| No. | Gel 3                                                                                                                                 |                  |            |                 |                       |                 |
|-----|---------------------------------------------------------------------------------------------------------------------------------------|------------------|------------|-----------------|-----------------------|-----------------|
|     | Protein                                                                                                                               | Accession number | Mass (kDa) | Peptides number | Sequence coverage (%) | Spectral counts |
| 236 | matrix-remodeling-associated protein 5 precursor                                                                                      | 139948432        | 312        | 14              | 5.80                  | 39              |
| 237 | profilin-1                                                                                                                            | 4826898          | 15         | 9               | 65                    | 39              |
| 238 | delta (3,5)-Delta (2,4)-dienoyl-CoA isomerase, mitochondrial precursor                                                                | 70995211         | 36         | 13              | 57                    | 39              |
| 239 | calmodulin                                                                                                                            | 58218968         | 17         | 11              | 81                    | 38              |
| 240 | mucin-6 precursor                                                                                                                     | 151301154        | 257        | 14              | 6.70                  | 38              |
| 241 | mitochondrial carrier homolog 2                                                                                                       | 7657347          | 33         | 9               | 46                    | 38              |
| 242 | dolichyl-diphosphooligosaccharide--protein glycosyltransferase 48 subunit precursor                                                   | 20070197         | 51         | 10              | 32                    | 38              |
| 243 | ras-related protein Rab-2B isoform 1                                                                                                  | 21361884         | 24         | 3               | 53                    | 38              |
| 244 | coiled-coil domain-containing protein 147                                                                                             | 56961680         | 103        | 15              | 19                    | 38              |
| 245 | apolipoprotein A-I preproprotein                                                                                                      | 4557321          | 31         | 10              | 39                    | 38              |
| 246 | ATP synthase subunit O, mitochondrial precursor                                                                                       | 4502303          | 23         | 12              | 67                    | 37              |
| 247 | nuclear pore complex protein Nup155 isoform 1                                                                                         | 24430149         | 155        | 15              | 15                    | 37              |
| 248 | enkurin                                                                                                                               | 21450721         | 29         | 11              | 47                    | 37              |
| 249 | NADH dehydrogenase [ubiquinone] iron-sulfur protein 3, mitochondrial precursor                                                        | 4758788          | 30         | 12              | 43                    | 37              |
| 250 | dihydropyridyllysine-residue succinyltransferase component of 2-oxoglutarate dehydrogenase complex, mitochondrial isoform 1 precursor | 19923748         | 49         | 10              | 34                    | 36              |
| 251 | ADP/ATP translocase 4                                                                                                                 | 13775208         | 35         | 11              | 37                    | 36              |
| 252 | mitochondria-eating protein                                                                                                           | 21687119         | 61         | 9               | 18                    | 36              |
| 253 | laminin subunit gamma-1 precursor                                                                                                     | 145309326        | 178        | 14              | 12                    | 35              |
| 254 | sperm acrosome membrane-associated protein 3                                                                                          | 27777653         | 23         | 6               | 28                    | 35              |
| 255 | proteasome subunit alpha type-1 isoform 1                                                                                             | 23110935         | 30         | 12              | 56                    | 35              |
| 256 | ras-related protein Rab-14                                                                                                            | 19923483         | 24         | 11              | 64                    | 35              |
| 257 | actin-related protein T2                                                                                                              | 29893808         | 42         | 10              | 39                    | 34              |
| 258 | neprilysin                                                                                                                            | 116256329        | 86         | 15              | 20                    | 34              |
| 259 | outer dense fiber protein 3                                                                                                           | 19526475         | 28         | 9               | 43                    | 34              |
| 260 | prohibitin                                                                                                                            | 4505773          | 30         | 9               | 42                    | 34              |
| 261 | 26S protease regulatory subunit 6B isoform 1                                                                                          | 5729991          | 47         | 12              | 35                    | 34              |
| 262 | isochorismatase domain-containing protein 2, mitochondrial isoform 2                                                                  | 13376007         | 24         | 6               | 60                    | 34              |
| 263 | endoplasmic reticulum resident protein 29 isoform 1 precursor                                                                         | 5803013          | 29         | 10              | 44                    | 34              |
| 264 | alpha-crystallin B chain                                                                                                              | 4503057          | 20         | 11              | 62                    | 34              |
| 265 | cofilin-1                                                                                                                             | 5031635          | 19         | 10              | 56                    | 33              |
| 266 | glucose-6-phosphate isomerase isoform 2                                                                                               | 18201905         | 63         | 11              | 28                    | 33              |
| 267 | transmembrane emp24 domain-containing protein 10 precursor                                                                            | 98986464         | 25         | 9               | 42                    | 33              |
| 268 | reticulocalbin-2 precursor                                                                                                            | 4506457          | 37         | 12              | 46                    | 33              |
| 269 | histone H3.1                                                                                                                          | 4504281          | 15         | 4               | 20                    | 33              |
| 270 | nucleoporin p54                                                                                                                       | 26051237         | 55         | 10              | 24                    | 33              |
| 271 | proteasome subunit alpha type-6                                                                                                       | 23110944         | 27         | 9               | 39                    | 33              |
| 272 | protein dpy-19 homolog 2                                                                                                              | 93277105         | 87         | 10              | 15                    | 32              |
| 273 | protein-L-isoaspartate (D-aspartate) O- methyltransferase isoform 2                                                                   | 354983493        | 30         | 11              | 52                    | 32              |
| 274 | ubiquitin-like modifier-activating enzyme 1                                                                                           | 23510340         | 118        | 10              | 8.60                  | 32              |
| 275 | 14-3-3 protein beta/alpha                                                                                                             | 21328448         | 28         | 3               | 35                    | 32              |
| 276 | adenylate kinase 7                                                                                                                    | 148727333        | 83         | 9               | 18                    | 32              |
| 277 | short-chain specific acyl-CoA dehydrogenase, mitochondrial precursor                                                                  | 4557233          | 44         | 7               | 25                    | 32              |
| 278 | thioredoxin-related transmembrane protein 4 precursor                                                                                 | 40254947         | 39         | 6               | 17                    | 32              |
| 279 | importin subunit alpha-2                                                                                                              | 4504897          | 58         | 9               | 23                    | 31              |
| 280 | nuclear pore complex protein Nup93 isoform 1                                                                                          | 208609990        | 93         | 11              | 12                    | 31              |
| 281 | medium-chain specific acyl-CoA dehydrogenase, mitochondrial isoform b precursor                                                       | 187960098        | 47         | 12              | 35                    | 31              |
| 282 | heme oxygenase 2                                                                                                                      | 8051608          | 36         | 9               | 46                    | 31              |
| 283 | transmembrane emp24 domain-containing protein 9 precursor                                                                             | 39725636         | 27         | 8               | 24                    | 31              |
| 284 | ADP-ribosylation factor 1                                                                                                             | 4502201          | 21         | 9               | 52                    | 31              |
| 285 | epididymal secretory protein E3-beta precursor                                                                                        | 11641279         | 18         | 6               | 50                    | 31              |
| 286 | stomatin-like protein 2                                                                                                               | 7305503          | 39         | 10              | 51                    | 31              |
| 287 | cytochrome b-c1 complex subunit Rieske, mitochondrial                                                                                 | 163644321        | 30         | 8               | 39                    | 31              |
| 288 | uncharacterized protein C20orf107 precursor                                                                                           | 71043642         | 19         | 10              | 56                    | 30              |
| 289 | synaptic vesicle membrane protein VAT-1 homolog                                                                                       | 18379349         | 42         | 11              | 39                    | 30              |
| 290 | brain acid soluble protein 1                                                                                                          | 30795231         | 23         | 6               | 47                    | 30              |

Contd...

Supplementary Table 4: Contd...

| No. | Protein                                                                           | Gel 3            |            |                 |                       |                 |
|-----|-----------------------------------------------------------------------------------|------------------|------------|-----------------|-----------------------|-----------------|
|     |                                                                                   | Accession number | Mass (kDa) | Peptides number | Sequence coverage (%) | Spectral counts |
| 291 | 26S proteasome non-ATPase regulatory subunit 13 isoform 1                         | 157502193        | 43         | 10              | 27                    | 29              |
| 292 | proteasome subunit alpha type-5 isoform 1                                         | 23110942         | 26         | 10              | 53                    | 29              |
| 293 | annexin A4                                                                        | 4502105          | 36         | 11              | 41                    | 29              |
| 294 | abhydrolase domain-containing protein 10, mitochondrial precursor                 | 8923001          | 34         | 6               | 26                    | 29              |
| 295 | sodium/potassium-transporting ATPase subunit alpha- 4 isoform 1                   | 153946397        | 114        | 12              | 13                    | 29              |
| 296 | protein NDRG1                                                                     | 37655183         | 43         | 5               | 22                    | 29              |
| 297 | carbonyl reductase [NADPH] 1                                                      | 4502599          | 30         | 10              | 40                    | 29              |
| 298 | isocitrate dehydrogenase [NAD] subunit beta, mitochondrial isoform a precursor    | 28178821         | 42         | 12              | 35                    | 29              |
| 299 | rab GDP dissociation inhibitor beta isoform 1                                     | 6598323          | 51         | 7               | 24                    | 29              |
| 300 | NADH dehydrogenase [ubiquinone] 1 beta subcomplex subunit 10                      | 4758774          | 21         | 6               | 37                    | 29              |
| 301 | DPY30 domain-containing protein 1                                                 | 20270377         | 21         | 11              | 76                    | 29              |
| 302 | serpin B6                                                                         | 41152086         | 43         | 10              | 39                    | 28              |
| 303 | 26S proteasome non-ATPase regulatory subunit 7                                    | 25777615         | 37         | 7               | 31                    | 28              |
| 304 | cytochrome c1, heme protein, mitochondrial                                        | 21359867         | 35         | 10              | 52                    | 28              |
| 305 | hydroxyacylglutathione hydrolase, mitochondrial isoform 1 precursor               | 94538322         | 34         | 11              | 37                    | 28              |
| 306 | SYNJ2BP-COX16 protein isoform 1                                                   | 321400118        | 21         | 7               | 33                    | 28              |
| 307 | proteasome subunit beta type-5 isoform 1                                          | 4506201          | 28         | 7               | 32                    | 28              |
| 308 | glycerol kinase 2                                                                 | 41393575         | 61         | 7               | 17                    | 28              |
| 309 | uromodulin precursor                                                              | 59850812         | 70         | 10              | 17                    | 28              |
| 310 | solute carrier family 2, facilitated glucose transporter member 14                | 23592238         | 56         | 8               | 14                    | 28              |
| 311 | signal peptidase complex subunit 2                                                | 162417971        | 25         | 11              | 39                    | 28              |
| 312 | tetratricopeptide repeat protein 25                                               | 13899233         | 77         | 11              | 14                    | 28              |
| 313 | ribonuclease inhibitor                                                            | 42822872         | 50         | 7               | 15                    | 28              |
| 314 | proteasome subunit beta type-6                                                    | 23110925         | 25         | 7               | 47                    | 28              |
| 315 | single-stranded DNA-binding protein, mitochondrial precursor                      | 4507231          | 17         | 6               | 42                    | 27              |
| 316 | electron transfer flavoprotein subunit beta isoform 1                             | 4503609          | 28         | 11              | 45                    | 27              |
| 317 | maltase-glucoamylase, intestinal                                                  | 221316699        | 210        | 10              | 7.10                  | 27              |
| 318 | endophilin-B1 isoform 2                                                           | 331284170        | 44         | 8               | 21                    | 27              |
| 319 | 14-3-3 protein gamma                                                              | 21464101         | 28         | 3               | 34                    | 27              |
| 320 | solute carrier family 2, facilitated glucose transporter member 3                 | 5902090          | 54         | 3               | 14                    | 27              |
| 321 | L-xylulose reductase isoform 1                                                    | 7705925          | 26         | 10              | 36                    | 27              |
| 322 | collagen alpha-1(XVIII) chain isoform 1 precursor                                 | 110611235        | 154        | 10              | 7.70                  | 27              |
| 323 | proteasome subunit beta type-7 proprotein                                         | 4506203          | 30         | 9               | 49                    | 27              |
| 324 | sperm-associated antigen 6 isoform 1                                              | 6912678          | 55         | 10              | 33                    | 26              |
| 325 | succinate dehydrogenase [ubiquinone] iron-sulfur subunit, mitochondrial precursor | 115387094        | 32         | 8               | 33                    | 26              |
| 326 | radial spoke head protein 3 homolog                                               | 31543559         | 64         | 7               | 17                    | 26              |
| 327 | transmembrane protease serine 2 isoform 2                                         | 205360943        | 54         | 5               | 8.70                  | 26              |
| 328 | proteasome subunit alpha type-7-like isoform 2                                    | 68303563         | 28         | 9               | 50                    | 26              |
| 329 | beta-defensin 129 precursor                                                       | 18250304         | 20         | 4               | 24                    | 26              |
| 330 | receptor expression-enhancing protein 6                                           | 19923919         | 21         | 7               | 33                    | 26              |
| 331 | ropporin-1-like protein                                                           | 17572807         | 26         | 10              | 47                    | 26              |
| 332 | adenylyl cyclase-associated protein 1                                             | 5453595          | 52         | 9               | 21                    | 26              |
| 333 | alpha-soluble NSF attachment protein                                              | 47933379         | 33         | 9               | 42                    | 26              |
| 334 | malectin precursor                                                                | 7661948          | 32         | 9               | 41                    | 25              |
| 335 | uncharacterized protein C7orf61                                                   | 51972226         | 24         | 5               | 34                    | 25              |
| 336 | proteasome subunit alpha type-2                                                   | 4506181          | 26         | 8               | 48                    | 25              |
| 337 | phosphatidylethanolamine-binding protein 1 preproprotein                          | 4505621          | 21         | 6               | 53                    | 25              |
| 338 | ubiquitin carboxyl-terminal hydrolase isozyme L3                                  | 5174741          | 26         | 6               | 33                    | 25              |
| 339 | flavin reductase (NADPH)                                                          | 4502419          | 22         | 6               | 35                    | 25              |
| 340 | eukaryotic translation initiation factor 5A-1 isoform B                           | 219555712        | 17         | 9               | 51                    | 25              |
| 341 | ras-related protein Rab-27B                                                       | 5729997          | 25         | 9               | 35                    | 25              |
| 342 | NADH dehydrogenase [ubiquinone] iron-sulfur protein 8, mitochondrial precursor    | 4505371          | 24         | 5               | 24                    | 25              |
| 343 | carboxypeptidase Z isoform 2 precursor                                            | 62388875         | 73         | 7               | 9.50                  | 24              |
| 344 | carboxypeptidase E preproprotein                                                  | 4503009          | 53         | 7               | 19                    | 24              |
| 345 | nuclear pore membrane glycoprotein 210 precursor                                  | 27477134         | 205        | 12              | 9.20                  | 24              |

Contd...

**Supplementary Table 4: Contd...**

| No. | Gel 3                                                                                            |                  |            |                 |                       |                 |
|-----|--------------------------------------------------------------------------------------------------|------------------|------------|-----------------|-----------------------|-----------------|
|     | Protein                                                                                          | Accession number | Mass (kDa) | Peptides number | Sequence coverage (%) | Spectral counts |
| 346 | 26S protease regulatory subunit 10B                                                              | 195539395        | 46         | 8               | 25                    | 24              |
| 347 | 26S proteasome non-ATPase regulatory subunit 14                                                  | 5031981          | 35         | 6               | 40                    | 24              |
| 348 | plasma membrane calcium-transporting ATPase 4 isoform 4b                                         | 48255957         | 134        | 10              | 10                    | 24              |
| 349 | alanyl-tRNA editing protein Aarsd1 isoform 1                                                     | 217416402        | 66         | 8               | 21                    | 24              |
| 350 | coiled-coil-helix-coiled-coil-helix domain-containing protein 3, mitochondrial precursor         | 8923390          | 26         | 7               | 24                    | 24              |
| 351 | 26S proteasome non-ATPase regulatory subunit 11                                                  | 28872725         | 47         | 7               | 21                    | 24              |
| 352 | transmembrane protein 190 precursor                                                              | 21040263         | 19         | 5               | 31                    | 24              |
| 353 | L-lactate dehydrogenase A-like 6B                                                                | 15082234         | 42         | 6               | 28                    | 24              |
| 354 | proteasome subunit beta type-4                                                                   | 22538467         | 29         | 7               | 45                    | 24              |
| 355 | membrane-associated progesterone receptor component 1                                            | 5729875          | 22         | 8               | 40                    | 24              |
| 356 | proteasome subunit beta type-3                                                                   | 22538465         | 23         | 5               | 32                    | 24              |
| 357 | very long-chain specific acyl-CoA dehydrogenase, mitochondrial isoform 2 precursor               | 76496475         | 68         | 10              | 25                    | 23              |
| 358 | filamin-B isoform 2                                                                              | 105990514        | 278        | 13              | 5.90                  | 23              |
| 359 | lipid phosphate phosphohydrolase 1 isoform 1                                                     | 29171736         | 32         | 4               | 21                    | 23              |
| 360 | lysosome-associated membrane glycoprotein 1 precursor                                            | 112380628        | 45         | 4               | 9.80                  | 23              |
| 361 | glypican-4 precursor                                                                             | 21614525         | 62         | 7               | 17                    | 23              |
| 362 | membrane-associated progesterone receptor component 2                                            | 291621647        | 26         | 4               | 17                    | 23              |
| 363 | endoplasmic reticulum resident protein 44 precursor                                              | 52487191         | 47         | 6               | 25                    | 23              |
| 364 | epididymal secretory protein E3-alpha precursor                                                  | 11386189         | 18         | 5               | 41                    | 23              |
| 365 | proteasome subunit alpha type-7                                                                  | 4506189          | 28         | 3               | 42                    | 23              |
| 366 | pyruvate dehydrogenase E1 component subunit alpha, testis-specific form, mitochondrial precursor | 4885543          | 43         | 8               | 18                    | 22              |
| 367 | G-protein coupled receptor 64 isoform 2 precursor                                                | 119943116        | 110        | 6               | 8.50                  | 22              |
| 368 | vesicle-fusing ATPase                                                                            | 156564401        | 83         | 8               | 13                    | 22              |
| 369 | ES1 protein homolog, mitochondrial isoform Ia precursor                                          | 296531406        | 28         | 7               | 38                    | 22              |
| 370 | tektin-1                                                                                         | 16753231         | 48         | 7               | 23                    | 22              |
| 371 | glutathione reductase, mitochondrial isoform 1 precursor                                         | 50301238         | 56         | 10              | 39                    | 22              |
| 372 | lactadherin isoform a preproprotein                                                              | 167830475        | 43         | 7               | 24                    | 22              |
| 373 | uncharacterized protein C9orf24 isoform 1                                                        | 21362074         | 30         | 7               | 28                    | 22              |
| 374 | enoyl-CoA delta isomerase 1, mitochondrial isoform 2 precursor                                   | 295842266        | 31         | 5               | 20                    | 22              |
| 375 | translin                                                                                         | 4759270          | 26         | 9               | 46                    | 22              |
| 376 | ADP-ribosylation factor 4                                                                        | 4502205          | 21         | 3               | 44                    | 22              |
| 377 | NADH dehydrogenase [ubiquinone] flavoprotein 2, mitochondrial precursor                          | 222080062        | 27         | 8               | 32                    | 22              |
| 378 | protein S100-A8                                                                                  | 21614544         | 11         | 5               | 47                    | 22              |
| 379 | WD repeat-containing protein 16 isoform b                                                        | 124028512        | 68         | 9               | 21                    | 21              |
| 380 | tripeptidyl-peptidase 2                                                                          | 186972143        | 138        | 9               | 10                    | 21              |
| 381 | keratin, type I cytoskeletal 19                                                                  | 24234699         | 44         | 3               | 19                    | 21              |
| 382 | aspartate aminotransferase, mitochondrial precursor                                              | 73486658         | 48         | 9               | 32                    | 21              |
| 383 | calcium-binding and spermatid-specific protein 1                                                 | 90652863         | 43         | 7               | 32                    | 21              |
| 384 | 26S proteasome non-ATPase regulatory subunit 2                                                   | 25777602         | 100        | 11              | 15                    | 21              |
| 385 | parkin coregulated gene protein isoform 2                                                        | 122939202        | 29         | 6               | 32                    | 21              |
| 386 | CDGSH iron-sulfur domain-containing protein 1                                                    | 8923930          | 12         | 6               | 56                    | 21              |
| 387 | transmembrane and coiled-coil domain-containing protein 2                                        | 56847610         | 20         | 5               | 28                    | 21              |
| 388 | FUN14 domain-containing protein 2                                                                | 24371248         | 21         | 10              | 42                    | 21              |
| 389 | vesicle-associated membrane protein 3                                                            | 4759300          | 11         | 6               | 53                    | 21              |
| 390 | acrosome formation-associated factor isoform 1                                                   | 239582757        | 33         | 4               | 21                    | 21              |
| 391 | NME1-NME2 protein                                                                                | 66392203         | 30         | 8               | 39                    | 21              |
| 392 | ribonuclease-like protein 13 precursor                                                           | 59276062         | 18         | 6               | 35                    | 21              |
| 393 | COP9 signalosome complex subunit 4                                                               | 38373690         | 46         | 8               | 21                    | 21              |
| 394 | zymogen granule protein 16 homolog B precursor                                                   | 94536866         | 23         | 5               | 34                    | 21              |
| 395 | keratin, type II cytoskeletal 8                                                                  | 4504919          | 54         | 4               | 14                    | 20              |
| 396 | 2-oxoglutarate dehydrogenase, mitochondrial isoform 3 precursor                                  | 259013553        | 116        | 9               | 9.80                  | 20              |
| 397 | alcohol dehydrogenase [NADP+]                                                                    | 24497577         | 37         | 6               | 13                    | 20              |
| 398 | eukaryotic initiation factor 4A-I isoform 1                                                      | 4503529          | 46         | 6               | 17                    | 20              |
| 399 | alpha-actinin-1 isoform c                                                                        | 194097352        | 103        | 2               | 11                    | 20              |
| 400 | cullin-associated NEDD8-dissociated protein 1                                                    | 21361794         | 136        | 8               | 8.80                  | 20              |

*Contd...*



Supplementary Table 4: Contd...

| No. | Gel 3                                                                               |                  |            |                 |                       |                 |
|-----|-------------------------------------------------------------------------------------|------------------|------------|-----------------|-----------------------|-----------------|
|     | Protein                                                                             | Accession number | Mass (kDa) | Peptides number | Sequence coverage (%) | Spectral counts |
| 401 | adenosylhomocysteinase isoform 1                                                    | 9951915          | 48         | 8               | 21                    | 20              |
| 402 | proteasome subunit beta type-1                                                      | 4506193          | 26         | 6               | 28                    | 20              |
| 403 | 26S protease regulatory subunit 7 isoform 1                                         | 4506209          | 49         | 8               | 25                    | 20              |
| 404 | protein FAM154A                                                                     | 301129242        | 55         | 5               | 16                    | 20              |
| 405 | sperm acrosome-associated protein 5 precursor                                       | 120952755        | 18         | 5               | 35                    | 20              |
| 406 | barrier-to-autointegration factor                                                   | 4502389          | 10         | 4               | 45                    | 20              |
| 407 | glutamate carboxypeptidase 2 isoform 1                                              | 4758398          | 84         | 9               | 18                    | 20              |
| 408 | GTP-binding nuclear protein Ran                                                     | 5453555          | 24         | 6               | 35                    | 20              |
| 409 | glypican-1 precursor                                                                | 167001141        | 62         | 7               | 15                    | 20              |
| 410 | sodium/potassium-transporting ATPase subunit alpha- 2 proprotein                    | 4502271          | 112        | 2               | 9.10                  | 20              |
| 411 | lysozyme-like protein 4 precursor                                                   | 21389465         | 16         | 5               | 42                    | 20              |
| 412 | thioredoxin domain-containing protein 3                                             | 148839372        | 67         | 8               | 19                    | 19              |
| 413 | importin-5                                                                          | 24797086         | 126        | 8               | 10                    | 19              |
| 414 | glucosidase 2 subunit beta isoform 1 precursor                                      | 48255889         | 59         | 7               | 13                    | 19              |
| 415 | lysosomal alpha-glucosidase preproprotein                                           | 119393891        | 105        | 6               | 8.00                  | 19              |
| 416 | sodium/potassium-transporting ATPase subunit beta-3                                 | 4502281          | 32         | 5               | 33                    | 19              |
| 417 | CD59 glycoprotein preproprotein                                                     | 187828910        | 14         | 3               | 25                    | 19              |
| 418 | calmin                                                                              | 19923599         | 112        | 10              | 15                    | 19              |
| 419 | adenylate kinase 8                                                                  | 22749187         | 55         | 7               | 19                    | 19              |
| 420 | extracellular matrix protein 1 isoform 3 precursor                                  | 322302700        | 64         | 7               | 11                    | 19              |
| 421 | transcription factor A, mitochondrial precursor                                     | 4507401          | 29         | 7               | 32                    | 19              |
| 422 | kallikrein-2 isoform 1 precursor                                                    | 5031829          | 29         | 5               | 18                    | 19              |
| 423 | 40S ribosomal protein S2                                                            | 15055539         | 31         | 7               | 21                    | 19              |
| 424 | kelch-like protein 10                                                               | 148664209        | 69         | 9               | 24                    | 19              |
| 425 | 40S ribosomal protein S3                                                            | 15718687         | 27         | 8               | 32                    | 19              |
| 426 | receptor expression-enhancing protein 5                                             | 115430112        | 21         | 6               | 25                    | 19              |
| 427 | sodium/potassium-transporting ATPase subunit alpha- 1 isoform a                     | 21361181         | 113        | 2               | 10                    | 19              |
| 428 | 4-trimethylaminobutyraldehyde dehydrogenase                                         | 115387104        | 56         | 7               | 15                    | 18              |
| 429 | NADH-cytochrome b5 reductase 2                                                      | 47778923         | 31         | 9               | 46                    | 18              |
| 430 | kunitz-type protease inhibitor 3 precursor                                          | 189571689        | 10         | 3               | 29                    | 18              |
| 431 | dynactin subunit 2                                                                  | 5453629          | 45         | 6               | 22                    | 18              |
| 432 | calpain small subunit 1                                                             | 51599151         | 28         | 5               | 44                    | 18              |
| 433 | ATP synthase subunit gamma, mitochondrial isoform L (liver) precursor               | 50345988         | 33         | 6               | 22                    | 18              |
| 434 | protein S100-A11                                                                    | 5032057          | 12         | 6               | 52                    | 18              |
| 435 | galectin-3-binding protein precursor                                                | 5031863          | 65         | 6               | 9.90                  | 18              |
| 436 | BPI fold-containing family A member 3 isoform 1 precursor                           | 109627654        | 28         | 5               | 31                    | 18              |
| 437 | mitochondrial import receptor subunit TOM22 homolog                                 | 9910382          | 16         | 6               | 77                    | 18              |
| 438 | epididymal secretory protein E1 precursor                                           | 5453678          | 17         | 6               | 45                    | 18              |
| 439 | cathepsin F precursor                                                               | 6042196          | 53         | 7               | 12                    | 18              |
| 440 | translationally-controlled tumor protein                                            | 4507669          | 20         | 5               | 55                    | 18              |
| 441 | EF-hand calcium-binding domain-containing protein 6 isoform a                       | 38570107         | 173        | 7               | 4.20                  | 18              |
| 442 | transmembrane emp24 domain-containing protein 7 precursor                           | 32996709         | 25         | 7               | 39                    | 18              |
| 443 | ras-related protein Rab-1B                                                          | 13569962         | 22         | 5               | 36                    | 18              |
| 444 | casein kinase II subunit alpha isoform a                                            | 29570791         | 45         | 5               | 22                    | 18              |
| 445 | 40S ribosomal protein SA                                                            | 59859885         | 33         | 6               | 32                    | 18              |
| 446 | deoxyuridine 5'-triphosphate nucleotidohydrolase, mitochondrial isoform 1 precursor | 70906441         | 27         | 6               | 33                    | 18              |
| 447 | adenine phosphoribosyltransferase isoform a                                         | 4502171          | 20         | 7               | 36                    | 18              |
| 448 | chloride intracellular channel protein 1                                            | 14251209         | 27         | 7               | 30                    | 17              |
| 449 | cytochrome b-c1 complex subunit 7 isoform 1                                         | 5454152          | 14         | 7               | 55                    | 17              |
| 450 | rho GDP-dissociation inhibitor 1 isoform a                                          | 4757768          | 23         | 3               | 23                    | 17              |
| 451 | transmembrane emp24 domain-containing protein 4 precursor                           | 33457308         | 26         | 3               | 20                    | 17              |
| 452 | lysyl-tRNA synthetase isoform 1                                                     | 194272210        | 71         | 6               | 11                    | 17              |
| 453 | dnaJ homolog subfamily B member 11 precursor                                        | 7706495          | 41         | 7               | 25                    | 17              |
| 454 | carboxypeptidase D isoform 1 precursor                                              | 22202611         | 153        | 10              | 11                    | 17              |
| 455 | phosphoglycerate mutase 2                                                           | 50593010         | 29         | 5               | 27                    | 17              |

Contd...

Supplementary Table 4: Contd...

| No. | Gel 3                                                                          |                  |            |                 |                       |                 |
|-----|--------------------------------------------------------------------------------|------------------|------------|-----------------|-----------------------|-----------------|
|     | Protein                                                                        | Accession number | Mass (kDa) | Peptides number | Sequence coverage (%) | Spectral counts |
| 456 | ras GTPase-activating-like protein IQGAP1                                      | 4506787          | 189        | 9               | 6.30                  | 17              |
| 457 | 40S ribosomal protein S3a                                                      | 4506723          | 30         | 7               | 26                    | 17              |
| 458 | eukaryotic translation initiation factor 3 subunit F                           | 4503519          | 38         | 5               | 16                    | 17              |
| 459 | nicastrin precursor                                                            | 24638433         | 78         | 6               | 9.90                  | 17              |
| 460 | signal peptidase complex subunit 3                                             | 11345462         | 20         | 5               | 26                    | 17              |
| 461 | beta-lactamase-like protein 2                                                  | 7705793          | 33         | 7               | 32                    | 17              |
| 462 | stress-induced-phosphoprotein 1                                                | 5803181          | 63         | 6               | 13                    | 17              |
| 463 | von Willebrand factor A domain-containing protein 1 isoform 1 precursor        | 40068485         | 47         | 7               | 28                    | 17              |
| 464 | prenylcysteine oxidase 1 precursor                                             | 166795301        | 57         | 6               | 18                    | 17              |
| 465 | ras-related protein Rab-3D                                                     | 4759000          | 24         | 3               | 32                    | 17              |
| 466 | ATPase inhibitor, mitochondrial isoform 1 precursor                            | 7705927          | 12         | 3               | 15                    | 17              |
| 467 | F-actin-capping protein subunit alpha-1                                        | 5453597          | 33         | 5               | 31                    | 17              |
| 468 | lactoylglutathione lyase                                                       | 118402586        | 21         | 6               | 29                    | 17              |
| 469 | proteasome subunit beta type-2 isoform 1                                       | 4506195          | 23         | 6               | 38                    | 17              |
| 470 | histone H2A type 1-A                                                           | 25092737         | 14         | 3               | 27                    | 16              |
| 471 | proteasome subunit alpha type-4 isoform 1                                      | 4506185          | 29         | 6               | 25                    | 16              |
| 472 | protein S100-A9                                                                | 4506773          | 13         | 4               | 46                    | 16              |
| 473 | pyruvate dehydrogenase protein X component, mitochondrial isoform 2            | 203098816        | 51         | 7               | 24                    | 16              |
| 474 | 6-phosphogluconate dehydrogenase, decarboxylating                              | 40068518         | 53         | 7               | 21                    | 16              |
| 475 | complement component 1 Q subcomponent-binding protein, mitochondrial precursor | 4502491          | 31         | 5               | 32                    | 16              |
| 476 | long-chain-fatty-acid--CoA ligase 6 isoform e                                  | 327412327        | 79         | 6               | 13                    | 16              |
| 477 | proteasome activator complex subunit 1 isoform 1                               | 5453990          | 29         | 5               | 30                    | 16              |
| 478 | copper homeostasis protein cutC homolog                                        | 148596990        | 29         | 5               | 31                    | 16              |
| 479 | myosin regulatory light chain 12B                                              | 15809016         | 20         | 6               | 45                    | 16              |
| 480 | UPF0468 protein C16orf80                                                       | 8392875          | 23         | 3               | 16                    | 16              |
| 481 | mesencephalic astrocyte-derived neurotrophic factor precursor                  | 299523086        | 21         | 6               | 19                    | 16              |
| 482 | cAMP-dependent protein kinase catalytic subunit alpha isoform 2                | 46909584         | 40         | 3               | 14                    | 16              |
| 483 | ecto-ADP-ribosyltransferase 3 isoform a precursor                              | 194097380        | 44         | 4               | 11                    | 16              |
| 484 | ATP-citrate synthase isoform 1                                                 | 38569421         | 121        | 6               | 3.70                  | 16              |
| 485 | ras-related protein Rab-3B                                                     | 19923750         | 25         | 5               | 36                    | 16              |
| 486 | adenylate kinase 2, mitochondrial isoform a                                    | 4502013          | 26         | 6               | 41                    | 16              |
| 487 | glycodelin precursor                                                           | 65507501         | 21         | 3               | 24                    | 16              |
| 488 | ATP synthase subunit g, mitochondrial                                          | 51479156         | 11         | 5               | 43                    | 16              |
| 489 | transmembrane emp24 domain-containing protein 2 precursor                      | 5803149          | 23         | 4               | 31                    | 16              |
| 490 | heme-binding protein 2                                                         | 7657603          | 23         | 4               | 24                    | 16              |
| 491 | cadherin-1 preproprotein                                                       | 4757960          | 97         | 3               | 3.20                  | 16              |
| 492 | transthyretin precursor                                                        | 4507725          | 16         | 5               | 51                    | 16              |
| 493 | eukaryotic initiation factor 4A-II                                             | 83700235         | 46         | 2               | 21                    | 16              |
| 494 | myosin-10                                                                      | 41406064         | 229        | 2               | 4.10                  | 15              |
| 495 | dynein heavy chain 17, axonemal                                                | 256542310        | 509        | 9               | 2.90                  | 15              |
| 496 | dynein heavy chain 8, axonemal                                                 | 332688227        | 539        | 10              | 2.50                  | 15              |
| 497 | leucine zipper transcription factor-like protein 1                             | 9966793          | 35         | 5               | 23                    | 15              |
| 498 | melanoma inhibitory activity protein 3 precursor                               | 122891870        | 214        | 7               | 4.80                  | 15              |
| 499 | ADP/ATP translocase 2                                                          | 156071459        | 33         | 3               | 19                    | 15              |
| 500 | mRNA export factor                                                             | 62739173         | 41         | 6               | 16                    | 15              |
| 501 | testis-expressed protein 101 isoform 1                                         | 194018544        | 29         | 3               | 15                    | 15              |
| 502 | voltage-dependent anion-selective channel protein 1                            | 4507879          | 31         | 3               | 16                    | 15              |
| 503 | proteasome subunit alpha type-3 isoform 2                                      | 23110939         | 28         | 7               | 34                    | 15              |
| 504 | nuclear pore glycoprotein p62                                                  | 24497605         | 53         | 5               | 14                    | 15              |
| 505 | zinc-alpha-2-glycoprotein precursor                                            | 4502337          | 34         | 7               | 27                    | 15              |
| 506 | hypoxanthine-guanine phosphoribosyltransferase                                 | 4504483          | 25         | 6               | 43                    | 15              |
| 507 | L-lactate dehydrogenase B chain                                                | 4557032          | 37         | 3               | 16                    | 15              |
| 508 | 26S proteasome non-ATPase regulatory subunit 3                                 | 25777612         | 61         | 4               | 9.90                  | 15              |
| 509 | transmembrane protein 89 precursor                                             | 56847630         | 18         | 4               | 28                    | 15              |
| 510 | calcium-binding mitochondrial carrier protein Aralar1                          | 21361103         | 75         | 6               | 13                    | 15              |

Contd...

Supplementary Table 4: Contd...

| No. | Protein                                                                | Gel 3            |            |                 |                       |                 |
|-----|------------------------------------------------------------------------|------------------|------------|-----------------|-----------------------|-----------------|
|     |                                                                        | Accession number | Mass (kDa) | Peptides number | Sequence coverage (%) | Spectral counts |
| 511 | izumo sperm-egg fusion protein 2 precursor                             | 63999117         | 25         | 4               | 14                    | 15              |
| 512 | UPF0733 protein C2orf88                                                | 110349742        | 11         | 6               | 68                    | 14              |
| 513 | prostate and testis expressed protein 1 precursor                      | 19923082         | 14         | 5               | 45                    | 14              |
| 514 | thioredoxin isoform 1                                                  | 50592994         | 12         | 3               | 32                    | 14              |
| 515 | coiled-coil domain-containing protein 63                               | 22749217         | 66         | 6               | 14                    | 14              |
| 516 | translin-associated protein X                                          | 5174731          | 33         | 6               | 26                    | 14              |
| 517 | dnaJ homolog subfamily A member 2                                      | 5031741          | 46         | 6               | 24                    | 14              |
| 518 | prostasin preproprotein                                                | 4506153          | 36         | 3               | 18                    | 14              |
| 519 | eukaryotic translation elongation factor 1 epsilon-1 isoform 1         | 4758862          | 20         | 5               | 41                    | 14              |
| 520 | fragile X mental retardation 1 neighbor protein                        | 22749199         | 29         | 4               | 15                    | 14              |
| 521 | diablo homolog, mitochondrial isoform 1 precursor                      | 9845297          | 27         | 5               | 26                    | 14              |
| 522 | cathepsin D preproprotein                                              | 4503143          | 45         | 5               | 18                    | 14              |
| 523 | superoxide dismutase [Cu-Zn]                                           | 4507149          | 16         | 5               | 60                    | 14              |
| 524 | dnaJ homolog subfamily B member 13                                     | 39204547         | 36         | 5               | 22                    | 14              |
| 525 | uncharacterized protein C15orf26                                       | 148747373        | 34         | 4               | 18                    | 14              |
| 526 | fatty-acid amide hydrolase 1                                           | 166795287        | 63         | 6               | 12                    | 14              |
| 527 | ras-related protein Rab-1A isoform 1                                   | 4758988          | 23         | 3               | 42                    | 14              |
| 528 | enoyl-CoA delta isomerase 2, mitochondrial isoform 2                   | 260274832        | 44         | 7               | 23                    | 14              |
| 529 | EF-hand domain-containing protein 1 isoform 1                          | 156616292        | 74         | 9               | 17                    | 13              |
| 530 | exportin-7                                                             | 154448892        | 124        | 6               | 5.80                  | 13              |
| 531 | tektin-5                                                               | 21389569         | 56         | 7               | 21                    | 13              |
| 532 | regenerating islet-derived protein 3-gamma precursor                   | 38348213         | 19         | 4               | 34                    | 13              |
| 533 | UTP--glucose-1-phosphate uridylyltransferase isoform b                 | 48255968         | 56         | 5               | 13                    | 13              |
| 534 | T-complex protein 11 homolog isoform 1                                 | 148226214        | 57         | 6               | 23                    | 13              |
| 535 | annexin A11                                                            | 22165431         | 54         | 5               | 15                    | 13              |
| 536 | superoxide dismutase [Mn], mitochondrial isoform A precursor           | 67782305         | 25         | 4               | 32                    | 13              |
| 537 | poly (rC)-binding protein 1                                            | 222352151        | 37         | 3               | 9.30                  | 13              |
| 538 | glycogen phosphorylase, brain form                                     | 21361370         | 97         | 5               | 6.20                  | 13              |
| 539 | F-actin-capping protein subunit beta isoform 1                         | 4826659          | 31         | 5               | 19                    | 13              |
| 540 | cystatin-B                                                             | 4503117          | 11         | 4               | 55                    | 13              |
| 541 | 3-ketoacyl-CoA thiolase, mitochondrial                                 | 167614485        | 42         | 5               | 26                    | 13              |
| 542 | UPF0740 protein C1orf192                                               | 63029930         | 19         | 3               | 22                    | 13              |
| 543 | 45 calcium-binding protein isoform 2 precursor                         | 18699732         | 42         | 6               | 23                    | 13              |
| 544 | ras-related protein Rab-5C isoform a                                   | 41393614         | 23         | 5               | 30                    | 13              |
| 545 | casein kinase II subunit beta                                          | 23503295         | 25         | 6               | 46                    | 13              |
| 546 | dynein light chain 1, axonemal isoform 1                               | 164607156        | 22         | 6               | 28                    | 13              |
| 547 | HD domain-containing protein 2                                         | 116875826        | 23         | 5               | 36                    | 13              |
| 548 | translocon-associated protein subunit alpha precursor                  | 169404009        | 32         | 3               | 12                    | 13              |
| 549 | acyl carrier protein, mitochondrial precursor                          | 4826852          | 17         | 3               | 21                    | 13              |
| 550 | ferritin heavy chain                                                   | 56682959         | 21         | 6               | 37                    | 13              |
| 551 | thioredoxin-dependent peroxide reductase, mitochondrial isoform b      | 32483377         | 26         | 3               | 16                    | 13              |
| 552 | COP9 signalosome complex subunit 8 isoform 1                           | 5729779          | 23         | 3               | 29                    | 13              |
| 553 | apoptosis-inducing factor 1, mitochondrial isoform 2 precursor         | 22202629         | 66         | 7               | 16                    | 13              |
| 554 | carbonic anhydrase 2                                                   | 4557395          | 29         | 5               | 24                    | 13              |
| 555 | LETM1 and EF-hand domain-containing protein 1, mitochondrial precursor | 6912482          | 83         | 5               | 7.60                  | 12              |
| 556 | cytoplasmic dynein 1 heavy chain 1                                     | 33350932         | 532        | 7               | 1.20                  | 12              |
| 557 | bifunctional aminoacyl-tRNA synthetase                                 | 62241042         | 171        | 6               | 4.70                  | 12              |
| 558 | sperm acrosome membrane-associated protein 4 precursor                 | 19424138         | 13         | 2               | 22                    | 12              |
| 559 | aspartyl aminopeptidase                                                | 156416028        | 53         | 4               | 15                    | 12              |
| 560 | gamma-glutamyltranspeptidase 1 precursor                               | 73915090         | 61         | 4               | 6.30                  | 12              |
| 561 | dnaJ homolog subfamily B member 1                                      | 5453690          | 38         | 4               | 14                    | 12              |
| 562 | coiled-coil domain-containing protein 105                              | 226492892        | 57         | 7               | 16                    | 12              |
| 563 | malate dehydrogenase, cytoplasmic isoform 1                            | 312283701        | 39         | 4               | 18                    | 12              |
| 564 | erythrocyte band 7 integral membrane protein isoform a                 | 38016911         | 32         | 4               | 20                    | 12              |
| 565 | 60S acidic ribosomal protein P2                                        | 4506671          | 12         | 4               | 59                    | 12              |

Contd...

| No. | Gel 3                                                                          |                  |            |                 |                       |                 |
|-----|--------------------------------------------------------------------------------|------------------|------------|-----------------|-----------------------|-----------------|
|     | Protein                                                                        | Accession number | Mass (kDa) | Peptides number | Sequence coverage (%) | Spectral counts |
| 566 | protein NipSnap homolog 3A                                                     | 22267436         | 28         | 5               | 28                    | 12              |
| 567 | programmed cell death protein 6                                                | 7019485          | 22         | 6               | 45                    | 12              |
| 568 | cytochrome c oxidase subunit 6B1                                               | 4502985          | 10         | 4               | 34                    | 12              |
| 569 | tryptophanyl-tRNA synthetase, cytoplasmic isoform b                            | 47419918         | 49         | 4               | 17                    | 12              |
| 570 | nucleoporin p58/p45 isoform a                                                  | 30102928         | 61         | 5               | 15                    | 12              |
| 571 | stromal cell-derived factor 2-like protein 1 precursor                         | 56243533         | 24         | 3               | 20                    | 12              |
| 572 | speriolin isoform 1                                                            | 197276668        | 62         | 4               | 9.80                  | 12              |
| 573 | A disintegrin and metalloproteinase with thrombospondin motifs 1 preproprotein | 50845384         | 105        | 4               | 6.80                  | 12              |
| 574 | general vesicular transport factor p115                                        | 4505541          | 108        | 5               | 5.50                  | 12              |
| 575 | prenylated Rab acceptor protein 1                                              | 222144309        | 21         | 3               | 18                    | 12              |
| 576 | nucleotide exchange factor SIL1 precursor                                      | 11968009         | 52         | 5               | 13                    | 12              |
| 577 | 26S proteasome non-ATPase regulatory subunit 8                                 | 156631005        | 40         | 6               | 23                    | 12              |
| 578 | 3-hydroxyacyl-CoA dehydrogenase type-2 isoform 1                               | 4758504          | 27         | 4               | 15                    | 12              |
| 579 | acylamino-acid-releasing enzyme                                                | 23510451         | 81         | 6               | 11                    | 12              |
| 580 | ubiquitin thioesterase OTUB1                                                   | 109148508        | 31         | 6               | 25                    | 12              |
| 581 | serine protease inhibitor Kazal-type 2 precursor                               | 10863911         | 9          | 2               | 36                    | 12              |
| 582 | dnaJ homolog subfamily B member 8                                              | 23503241         | 26         | 4               | 22                    | 11              |
| 583 | EGF-like repeat and discoidin I-like domain-containing protein 3 precursor     | 31317224         | 54         | 5               | 14                    | 11              |
| 584 | eukaryotic translation initiation factor 3 subunit I                           | 4503513          | 37         | 4               | 22                    | 11              |
| 585 | CD177 antigen precursor                                                        | 110735433        | 46         | 4               | 15                    | 11              |
| 586 | kinectin isoform a                                                             | 33620775         | 156        | 9               | 7.70                  | 11              |
| 587 | serine protease 58 precursor                                                   | 48255915         | 27         | 4               | 18                    | 11              |
| 588 | septin-7 isoform 2                                                             | 148352329        | 51         | 4               | 16                    | 11              |
| 589 | nucleoporin NUP53                                                              | 31982904         | 35         | 4               | 19                    | 11              |
| 590 | ubiquitin carboxyl-terminal hydrolase 14 isoform b                             | 82880645         | 52         | 5               | 16                    | 11              |
| 591 | signal peptidase complex catalytic subunit SEC11A                              | 7657609          | 21         | 4               | 31                    | 11              |
| 592 | mitochondrial dicarboxylate carrier                                            | 20149598         | 31         | 4               | 18                    | 11              |
| 593 | serine/threonine-protein phosphatase PGAM5, mitochondrial isoform 1            | 281604136        | 32         | 2               | 7.60                  | 11              |
| 594 | aspartate aminotransferase, cytoplasmic                                        | 4504067          | 46         | 5               | 24                    | 11              |
| 595 | actin-related protein M1                                                       | 221139714        | 41         | 5               | 18                    | 11              |
| 596 | syntaxin-12                                                                    | 28933465         | 32         | 4               | 27                    | 11              |
| 597 | leucine-rich repeat-containing protein 23 isoform a                            | 42542396         | 40         | 4               | 21                    | 11              |
| 598 | gamma-glutamyl hydrolase precursor                                             | 4503987          | 36         | 3               | 12                    | 11              |
| 599 | elongation factor 1-beta                                                       | 4503477          | 25         | 3               | 30                    | 11              |
| 600 | serine/threonine-protein phosphatase 2A 65 regulatory subunit A alpha isoform  | 21361399         | 65         | 5               | 9.80                  | 11              |
| 601 | purine nucleoside phosphorylase                                                | 157168362        | 32         | 4               | 16                    | 11              |
| 602 | voltage-dependent calcium channel subunit alpha-2/delta-2 isoform c            | 291290994        | 130        | 5               | 5.20                  | 11              |
| 603 | UMP-CMP kinase isoform a                                                       | 7706497          | 26         | 4               | 24                    | 11              |
| 604 | carnitine O-acetyltransferase precursor                                        | 21618331         | 71         | 4               | 9.30                  | 11              |
| 605 | phospholipase A1 member A isoform 2 precursor                                  | 332688256        | 48         | 3               | 10                    | 11              |
| 606 | actin-like protein 9                                                           | 194097462        | 46         | 5               | 21                    | 11              |
| 607 | chloride intracellular channel protein 4                                       | 7330335          | 29         | 4               | 22                    | 11              |
| 608 | GTP-binding protein SAR1b                                                      | 7705827          | 22         | 2               | 35                    | 11              |
| 609 | alpha-mannosidase 2C1                                                          | 46852164         | 116        | 4               | 5.40                  | 10              |
| 610 | vimentin                                                                       | 62414289         | 54         | 5               | 14                    | 10              |
| 611 | alpha-1-antitrypsin precursor                                                  | 50363217         | 47         | 4               | 12                    | 10              |
| 612 | aldose reductase                                                               | 4502049          | 36         | 4               | 20                    | 10              |
| 613 | NADH dehydrogenase [ubiquinone] 1 alpha subcomplex subunit 8                   | 7657369          | 20         | 3               | 22                    | 10              |
| 614 | slit homolog 2 protein precursor                                               | 4759146          | 170        | 6               | 6.40                  | 10              |
| 615 | testis, prostate and placenta-expressed protein isoform 2 precursor            | 154759245        | 31         | 5               | 29                    | 10              |
| 616 | transcription elongation factor B polypeptide 2 isoform b                      | 46276893         | 18         | 4               | 34                    | 10              |
| 617 | dynactin subunit 1 isoform 1                                                   | 13259510         | 142        | 5               | 3.80                  | 10              |
| 618 | heterogeneous nuclear ribonucleoprotein M isoform a                            | 14141152         | 78         | 6               | 9.70                  | 10              |
| 619 | methionyl-tRNA synthetase, cytoplasmic                                         | 14043022         | 101        | 5               | 8.40                  | 10              |
| 620 | tubulin polymerization-promoting protein family member 2                       | 226491350        | 19         | 5               | 48                    | 10              |

Contd...

**Supplementary Table 4: Contd...**

| No. | Protein                                                                           | Gel 3            |            |                 |                       |                 |
|-----|-----------------------------------------------------------------------------------|------------------|------------|-----------------|-----------------------|-----------------|
|     |                                                                                   | Accession number | Mass (kDa) | Peptides number | Sequence coverage (%) | Spectral counts |
| 621 | anterior gradient protein 2 homolog precursor                                     | 5453541          | 20         | 4               | 33                    | 10              |
| 622 | proteasome activator complex subunit 4                                            | 163644283        | 211        | 5               | 3.60                  | 10              |
| 623 | transcription elongation factor B polypeptide 1 isoform a                         | 325652033        | 12         | 5               | 51                    | 10              |
| 624 | tomoregulin-2 precursor                                                           | 12383051         | 41         | 4               | 11                    | 10              |
| 625 | serine/threonine-protein phosphatase 2A catalytic subunit alpha isoform           | 4506017          | 36         | 4               | 21                    | 10              |
| 626 | uncharacterized protein C9orf171                                                  | 46409466         | 36         | 4               | 14                    | 10              |
| 627 | apolipoprotein D precursor                                                        | 4502163          | 21         | 4               | 22                    | 10              |
| 628 | EF-hand calcium-binding domain-containing protein 1 isoform a                     | 13375787         | 24         | 4               | 27                    | 10              |
| 629 | tropomyosin alpha-3 chain isoform 2                                               | 24119203         | 29         | 3               | 17                    | 10              |
| 630 | ran-specific GTPase-activating protein                                            | 4506407          | 23         | 2               | 10.00                 | 10              |
| 631 | nucleophosmin isoform 1                                                           | 10835063         | 33         | 2               | 17                    | 10              |
| 632 | protein DPCD                                                                      | 39930355         | 23         | 5               | 34                    | 10              |
| 633 | NADH dehydrogenase [ubiquinone] 1 beta subcomplex subunit 7                       | 10764847         | 16         | 4               | 27                    | 10              |
| 634 | midkine precursor                                                                 | 4505135          | 16         | 2               | 18                    | 10              |
| 635 | puromycin-sensitive aminopeptidase                                                | 158937236        | 103        | 5               | 2.70                  | 10              |
| 636 | ATP synthase subunit epsilon, mitochondrial                                       | 5901896          | 6          | 3               | 45                    | 10              |
| 637 | GLIPR1-like protein 1 precursor                                                   | 22749527         | 26         | 4               | 16                    | 10              |
| 638 | acyl-protein thioesterase 1                                                       | 5453722          | 25         | 4               | 32                    | 10              |
| 639 | NADH dehydrogenase [ubiquinone] flavoprotein 1, mitochondrial isoform 1 precursor | 20149568         | 51         | 4               | 13                    | 9               |
| 640 | calmegin precursor                                                                | 4758004          | 70         | 4               | 9.00                  | 9               |
| 641 | EF-hand domain-containing family member C2                                        | 31542743         | 87         | 4               | 3.10                  | 9               |
| 642 | testis-specific H1 histone                                                        | 32401437         | 28         | 2               | 9.40                  | 9               |
| 643 | leukocyte surface antigen CD47 isoform 1 precursor                                | 4502673          | 35         | 2               | 5.90                  | 9               |
| 644 | uncharacterized protein C2orf57                                                   | 284413778        | 42         | 4               | 15                    | 9               |
| 645 | histone H1t .                                                                     | 20544168         | 22         | 3               | 17                    | 9               |
| 646 | V-type proton ATPase catalytic subunit A                                          | 19913424         | 68         | 3               | 8.60                  | 9               |
| 647 | dnaJ homolog subfamily A member 4 isoform 2                                       | 194328760        | 45         | 5               | 17                    | 9               |
| 648 | phosphate carrier protein, mitochondrial isoform b precursor                      | 47132595         | 40         | 3               | 9.70                  | 9               |
| 649 | gelsolin isoform a precursor                                                      | 4504165          | 86         | 3               | 4.00                  | 9               |
| 650 | disintegrin and metalloproteinase domain-containing protein 7 preproprotein       | 114326453        | 86         | 4               | 7.30                  | 9               |
| 651 | 26S proteasome non-ATPase regulatory subunit 4                                    | 5292161          | 41         | 5               | 18                    | 9               |
| 652 | pro-cathepsin H preproprotein                                                     | 23110955         | 37         | 2               | 8.40                  | 9               |
| 653 | ras-related protein Ral-A precursor                                               | 33946329         | 24         | 3               | 18                    | 9               |
| 654 | dnaJ homolog subfamily B member 6 isoform b                                       | 4885495          | 27         | 2               | 14                    | 9               |
| 655 | probable inactive serine protease 37 isoform 1 precursor                          | 285394164        | 26         | 3               | 16                    | 9               |
| 656 | metalloproteinase inhibitor 1 precursor                                           | 4507509          | 23         | 3               | 27                    | 9               |
| 657 | UBX domain-containing protein 11 isoform 1                                        | 116734681        | 54         | 3               | 11                    | 9               |
| 658 | glutathione S-transferase Mu 1 isoform 1                                          | 23065544         | 26         | 2               | 14                    | 9               |
| 659 | retinoid-inducible serine carboxypeptidase precursor                              | 11055992         | 51         | 3               | 5.50                  | 9               |
| 660 | sulfatase-modifying factor 2 isoform e precursor                                  | 194248090        | 39         | 3               | 11                    | 9               |
| 661 | 60S ribosomal protein L7a                                                         | 4506661          | 30         | 3               | 15                    | 9               |
| 662 | cytochrome c oxidase subunit 7A2, mitochondrial precursor                         | 262118227        | 13         | 3               | 22                    | 9               |
| 663 | eukaryotic translation initiation factor 6 isoform a                              | 4504771          | 27         | 3               | 20                    | 9               |
| 664 | peptidyl-prolyl cis-trans isomerase F, mitochondrial precursor                    | 5031987          | 22         | 3               | 21                    | 9               |
| 665 | ras-related protein Rab-6A isoform b                                              | 38679888         | 24         | 3               | 23                    | 9               |
| 666 | actin-like protein 7A                                                             | 5729720          | 49         | 4               | 15                    | 9               |
| 667 | fumarylacetoacetate hydrolase domain-containing protein 2B                        | 40786394         | 35         | 3               | 17                    | 9               |
| 668 | retinal dehydrogenase 1                                                           | 21361176         | 55         | 5               | 17                    | 9               |
| 669 | izumo sperm-egg fusion protein 1 precursor                                        | 194097475        | 39         | 4               | 22                    | 9               |
| 670 | normal mucosa of esophagus-specific gene 1 protein                                | 37694067         | 10         | 4               | 29                    | 9               |
| 671 | UPF0587 protein C1orf123                                                          | 8923541          | 18         | 2               | 25                    | 9               |
| 672 | cell division control protein 42 homolog isoform 1                                | 4757952          | 21         | 3               | 26                    | 9               |
| 673 | F-actin-capping protein subunit alpha-3                                           | 15277417         | 35         | 3               | 12                    | 9               |
| 674 | bifunctional purine biosynthesis protein PURH                                     | 20127454         | 65         | 4               | 13                    | 9               |
| 675 | cancer/testis antigen 47A                                                         | 121949786        | 30         | 3               | 15                    | 9               |

Contd...

Supplementary Table 4: Contd...

| No. | Protein                                                                      | Gel 3            |            |                 |                       |                 |
|-----|------------------------------------------------------------------------------|------------------|------------|-----------------|-----------------------|-----------------|
|     |                                                                              | Accession number | Mass (kDa) | Peptides number | Sequence coverage (%) | Spectral counts |
| 676 | nitrilase homolog 1 isoform 3                                                | 297632348        | 34         | 3               | 9.60                  | 9               |
| 677 | ras-related C3 botulinum toxin substrate 1 isoform Rac1b                     | 9845509          | 23         | 4               | 13                    | 9               |
| 678 | NADH-cytochrome b5 reductase 3 isoform 2                                     | 193794826        | 32         | 3               | 23                    | 9               |
| 679 | sialidase-1 precursor                                                        | 4557791          | 45         | 3               | 12                    | 9               |
| 680 | coiled-coil domain-containing protein 19, mitochondrial precursor            | 81295816         | 66         | 4               | 10.00                 | 8               |
| 681 | 26S proteasome non-ATPase regulatory subunit 1 isoform 1                     | 25777600         | 106        | 3               | 5.00                  | 8               |
| 682 | cytochrome c                                                                 | 11128019         | 12         | 3               | 31                    | 8               |
| 683 | succinyl-CoA ligase [ADP-forming] subunit beta, mitochondrial precursor      | 11321583         | 50         | 3               | 7.80                  | 8               |
| 684 | large proline-rich protein BAG6 isoform a                                    | 149158692        | 119        | 4               | 4.50                  | 8               |
| 685 | 10 heat shock protein, mitochondrial                                         | 4504523          | 11         | 4               | 33                    | 8               |
| 686 | ras-related protein Rab-7a                                                   | 34147513         | 23         | 4               | 13                    | 8               |
| 687 | cullin-3                                                                     | 4503165          | 89         | 5               | 7.80                  | 8               |
| 688 | protein FAM71A                                                               | 282721094        | 63         | 3               | 5.40                  | 8               |
| 689 | bifunctional ATP-dependent dihydroxyacetone kinase/FAD-AMP lyase (cyclizing) | 20149621         | 59         | 3               | 8.30                  | 8               |
| 690 | 60S ribosomal protein L12                                                    | 4506597          | 18         | 4               | 40                    | 8               |
| 691 | dihydropteridine reductase                                                   | 208973246        | 26         | 3               | 21                    | 8               |
| 692 | keratin, type I cytoskeletal 18                                              | 4557888          | 48         | 2               | 13                    | 8               |
| 693 | mitochondrial import receptor subunit TOM34                                  | 21361356         | 35         | 4               | 19                    | 8               |
| 694 | lipase member I                                                              | 39752679         | 55         | 3               | 6.70                  | 8               |
| 695 | spermatogenesis-associated protein 19, mitochondrial precursor               | 28376652         | 19         | 3               | 26                    | 8               |
| 696 | proteasome activator complex subunit 2                                       | 30410792         | 27         | 4               | 18                    | 8               |
| 697 | S-phase kinase-associated protein 1 isoform b                                | 25777713         | 19         | 4               | 36                    | 8               |
| 698 | nucleoside diphosphate kinase 7 isoform a                                    | 7019465          | 42         | 4               | 15                    | 8               |
| 699 | atlastin-3                                                                   | 45827806         | 61         | 3               | 11                    | 8               |
| 700 | uncharacterized protein C6orf81                                              | 31542280         | 41         | 4               | 19                    | 8               |
| 701 | aflatoxin B1 aldehyde reductase member 2                                     | 41327764         | 40         | 4               | 16                    | 8               |
| 702 | four and a half LIM domains protein 1 isoform 1                              | 228480211        | 36         | 3               | 11                    | 8               |
| 703 | WD repeat-containing protein 65 isoform a                                    | 345199335        | 149        | 4               | 3.50                  | 8               |
| 704 | serine protease HTRA1 precursor                                              | 4506141          | 51         | 4               | 14                    | 8               |
| 705 | transcriptional activator protein Pur-alpha                                  | 5032007          | 35         | 3               | 18                    | 8               |
| 706 | macrophage-capping protein                                                   | 63252913         | 38         | 3               | 16                    | 8               |
| 707 | cytochrome b5 type B                                                         | 83921614         | 17         | 4               | 52                    | 8               |
| 708 | integral membrane protein 2B                                                 | 11527402         | 30         | 3               | 16                    | 8               |
| 709 | dynactin subunit 3 isoform 1                                                 | 6005745          | 21         | 4               | 19                    | 8               |
| 710 | intraflagellar transport protein 27 homolog isoform 2                        | 6857824          | 20         | 3               | 24                    | 8               |
| 711 | neutrophil defensin 3 preproprotein                                          | 4885179          | 10         | 3               | 20                    | 7               |
| 712 | protein ERGIC-53 precursor                                                   | 5031873          | 58         | 4               | 13                    | 7               |
| 713 | nuclear migration protein nudC                                               | 5729953          | 38         | 3               | 11                    | 7               |
| 714 | lysosome membrane protein 2 isoform 1 precursor                              | 5031631          | 54         | 3               | 7.30                  | 7               |
| 715 | glyoxylate reductase/hydroxypyruvate reductase                               | 6912396          | 36         | 3               | 16                    | 7               |
| 716 | arfaptin-1 isoform 1                                                         | 71040094         | 42         | 2               | 5.10                  | 7               |
| 717 | interferon-inducible GTPase 5                                                | 10257429         | 50         | 3               | 12                    | 7               |
| 718 | serine/threonine-protein phosphatase PP1-beta catalytic subunit isoform 1    | 4506005          | 37         | 2               | 7.60                  | 7               |
| 719 | sortilin isoform 1 preproprotein                                             | 17149834         | 92         | 3               | 4.60                  | 7               |
| 720 | 40S ribosomal protein S8                                                     | 4506743          | 24         | 3               | 13                    | 7               |
| 721 | histidine triad nucleotide-binding protein 2, mitochondrial precursor        | 14211923         | 17         | 3               | 31                    | 7               |
| 722 | inositol monophosphatase 1 isoform 2                                         | 221625487        | 37         | 3               | 11                    | 7               |
| 723 | mammaglobin-B precursor                                                      | 4505171          | 11         | 3               | 40                    | 7               |
| 724 | transmembrane protein 205                                                    | 63055043         | 21         | 2               | 16                    | 7               |
| 725 | ras-related protein Rab-5B isoform 1                                         | 354725902        | 24         | 3               | 22                    | 7               |
| 726 | carnitine O-palmitoyltransferase 1, muscle isoform isoform a                 | 223468678        | 88         | 4               | 6.30                  | 7               |
| 727 | thiamine-triphosphatase                                                      | 13236577         | 26         | 3               | 18                    | 7               |
| 728 | myosin light chain 6B                                                        | 313851001        | 23         | 2               | 18                    | 7               |
| 729 | acid ceramidase isoform b                                                    | 189011546        | 47         | 5               | 11                    | 7               |
| 730 | 3-mercaptopyruvate sulfurtransferase isoform 2                               | 61835204         | 33         | 2               | 14                    | 7               |

Contd...

Supplementary Table 4: Contd...

| No. | Gel 3                                                                          |                  |            |                 |                       |                 |
|-----|--------------------------------------------------------------------------------|------------------|------------|-----------------|-----------------------|-----------------|
|     | Protein                                                                        | Accession number | Mass (kDa) | Peptides number | Sequence coverage (%) | Spectral counts |
| 731 | ubiquitin-conjugating enzyme E2 L3                                             | 4507789          | 18         | 3               | 30                    | 7               |
| 732 | endoplasmic reticulum lectin 1 isoform 2 precursor                             | 188528696        | 52         | 3               | 11                    | 7               |
| 733 | acyl-CoA-binding protein isoform 5                                             | 295842514        | 14         | 3               | 36                    | 7               |
| 734 | 40S ribosomal protein S18                                                      | 11968182         | 18         | 3               | 18                    | 7               |
| 735 | ubiquitin thioesterase OTUB2                                                   | 12962939         | 27         | 3               | 16                    | 7               |
| 736 | spondin-2 precursor                                                            | 6912682          | 36         | 3               | 8.50                  | 7               |
| 737 | agouti-related protein precursor                                               | 4501995          | 14         | 2               | 15                    | 7               |
| 738 | V-type proton ATPase subunit E 1 isoform a                                     | 4502317          | 26         | 2               | 12                    | 7               |
| 739 | sperm-associated antigen 11B isoform D preproprotein                           | 126131097        | 15         | 2               | 17                    | 7               |
| 740 | dynein intermediate chain 1, axonemal                                          | 6912338          | 79         | 4               | 6.20                  | 7               |
| 741 | transmembrane protein 126A isoform 1                                           | 14150017         | 22         | 2               | 24                    | 7               |
| 742 | retinol dehydrogenase 11 isoform 1 precursor                                   | 166795268        | 35         | 3               | 15                    | 7               |
| 743 | heat shock 70 protein 4                                                        | 38327039         | 94         | 3               | 4.30                  | 7               |
| 744 | 40S ribosomal protein S17                                                      | 4506693          | 16         | 3               | 43                    | 7               |
| 745 | platelet-activating factor acetylhydrolase IB subunit beta isoform a           | 4505585          | 26         | 3               | 17                    | 7               |
| 746 | protein EAN57 isoform 1                                                        | 255759947        | 31         | 3               | 10                    | 7               |
| 747 | low molecular weight phosphotyrosine protein phosphatase isoform c             | 4757714          | 18         | 3               | 20                    | 7               |
| 748 | ankyrin repeat domain-containing protein 45                                    | 38348298         | 30         | 3               | 14                    | 7               |
| 749 | 40S ribosomal protein S4, X isoform X isoform                                  | 4506725          | 30         | 3               | 11                    | 7               |
| 750 | cat eye syndrome critical region protein 5 isoform 2 precursor                 | 14861834         | 46         | 4               | 18                    | 7               |
| 751 | profilin-3                                                                     | 71274140         | 15         | 2               | 18                    | 7               |
| 752 | ADP-ribosylation factor-like protein 3                                         | 4757774          | 20         | 3               | 28                    | 7               |
| 753 | azurocidin preproprotein                                                       | 11342670         | 27         | 4               | 32                    | 7               |
| 754 | prohibitin-2 isoform 2                                                         | 6005854          | 33         | 3               | 14                    | 7               |
| 755 | coiled-coil domain-containing protein 90B, mitochondrial precursor             | 20149663         | 30         | 3               | 15                    | 7               |
| 756 | endoplasmic reticulum-Golgi intermediate compartment protein 1                 | 72534712         | 33         | 3               | 16                    | 7               |
| 757 | centrin-1                                                                      | 4757974          | 20         | 3               | 24                    | 7               |
| 758 | fructose-1,6-bisphosphatase 1                                                  | 189083692        | 37         | 3               | 14                    | 7               |
| 759 | ras-related protein Rab-27A                                                    | 34485709         | 25         | 2               | 15                    | 7               |
| 760 | myeloid-associated differentiation marker                                      | 19923903         | 35         | 2               | 10                    | 7               |
| 761 | NADH dehydrogenase [ubiquinone] iron-sulfur protein 6, mitochondrial precursor | 4758792          | 14         | 3               | 20                    | 6               |
| 762 | apolipoprotein A-IV precursor                                                  | 71773110         | 45         | 4               | 13                    | 6               |
| 763 | calicin                                                                        | 169636428        | 67         | 4               | 9.90                  | 6               |
| 764 | nidogen-1 precursor                                                            | 115298674        | 136        | 4               | 4.20                  | 6               |
| 765 | V-type proton ATPase subunit B, brain isoform                                  | 19913428         | 57         | 3               | 12                    | 6               |
| 766 | nucleosome assembly protein 1-like 4                                           | 5174613          | 43         | 2               | 8.50                  | 6               |
| 767 | UPF0556 protein C19orf10 precursor                                             | 33457348         | 19         | 3               | 22                    | 6               |
| 768 | myotrophin                                                                     | 21956645         | 13         | 2               | 25                    | 6               |
| 769 | 72 type IV collagenase isoform a preproprotein                                 | 11342666         | 74         | 2               | 4.70                  | 6               |
| 770 | cystatin-C precursor                                                           | 4503107          | 16         | 2               | 18                    | 6               |
| 771 | PREDICTED: hypothetical protein LOC728597                                      | 341914388        | 72         | 3               | 4.90                  | 6               |
| 772 | trafficking protein particle complex subunit 3                                 | 7656926          | 20         | 3               | 19                    | 6               |
| 773 | complement decay-accelerating factor isoform 2 precursor                       | 168693643        | 49         | 3               | 10                    | 6               |
| 774 | serine/threonine-protein phosphatase 2A activator isoform b                    | 29725611         | 37         | 2               | 8.00                  | 6               |
| 775 | aspartyl-tRNA synthetase, cytoplasmic                                          | 45439306         | 57         | 3               | 9.20                  | 6               |
| 776 | uncharacterized protein C9orf135                                               | 58219541         | 26         | 3               | 21                    | 6               |
| 777 | dolichyl-diphosphooligosaccharide--protein glycosyltransferase subunit STT3A   | 22749415         | 81         | 3               | 4.30                  | 6               |
| 778 | myeloperoxidase precursor                                                      | 4557759          | 84         | 3               | 5.50                  | 6               |
| 779 | Sjogren syndrome nuclear autoantigen 1                                         | 189571687        | 14         | 2               | 20                    | 6               |
| 780 | dipeptidase 1 precursor                                                        | 4758190          | 46         | 2               | 8.30                  | 6               |
| 781 | cytochrome c oxidase subunit 6C proprotein                                     | 4758040          | 9          | 2               | 28                    | 6               |
| 782 | dynein light chain roadblock-type 2                                            | 18702323         | 11         | 2               | 29                    | 6               |
| 783 | transketolase-like protein 1 isoform b                                         | 225637461        | 65         | 2               | 5.10                  | 6               |
| 784 | transketolase-like protein 2                                                   | 133778974        | 68         | 3               | 7.80                  | 6               |
| 785 | glycerol-3-phosphate dehydrogenase 1-like protein                              | 24307999         | 38         | 2               | 4.80                  | 6               |

Contd...

## Supplementary Table 4: Contd...

| No. | Gel 3                                                               |                  |            |                 |                       |                 |
|-----|---------------------------------------------------------------------|------------------|------------|-----------------|-----------------------|-----------------|
|     | Protein                                                             | Accession number | Mass (kDa) | Peptides number | Sequence coverage (%) | Spectral counts |
| 786 | ectonucleotide pyrophosphatase/phosphodiesterase family member 3    | 111160296        | 100        | 3               | 5.60                  | 6               |
| 787 | alcohol dehydrogenase class-3                                       | 71565154         | 40         | 2               | 4.80                  | 6               |
| 788 | 60S ribosomal protein L18                                           | 4506607          | 22         | 2               | 14                    | 6               |
| 789 | cysteine desulfurase, mitochondrial isoform a                       | 32307132         | 50         | 3               | 10                    | 6               |
| 790 | ras-related protein Rap-1b isoform 1 precursor                      | 7661678          | 21         | 3               | 19                    | 6               |
| 791 | arginyl-tRNA synthetase, cytoplasmic                                | 15149476         | 75         | 3               | 5.00                  | 6               |
| 792 | late cornified envelope-like proline-rich protein 1                 | 58082087         | 11         | 2               | 42                    | 6               |
| 793 | NAD-dependent malic enzyme, mitochondrial isoform 1 precursor [Homo | 4505145          | 65         | 3               | 11                    | 6               |
| 794 | protein TSC21                                                       | 22749357         | 21         | 4               | 27                    | 6               |
| 795 | nuclear pore complex protein Nup205                                 | 57634534         | 228        | 4               | 2.30                  | 6               |
| 796 | 3-oxoacyl-[acyl-carrier-protein] synthase, mitochondrial isoform 1  | 8923559          | 49         | 3               | 15                    | 6               |
| 797 | carboxypeptidase M precursor                                        | 6631081          | 51         | 2               | 3.80                  | 6               |
| 798 | heat shock 70 protein 13 precursor                                  | 48928056         | 52         | 2               | 5.50                  | 6               |
| 799 | tripeptidyl-peptidase 1 preproprotein                               | 5729770          | 61         | 2               | 5.70                  | 6               |
| 800 | elongation factor Ts, mitochondrial isoform 2 precursor [Homo       | 171846268        | 35         | 2               | 14                    | 6               |
| 801 | epoxide hydrolase 2                                                 | 27597073         | 63         | 2               | 2.70                  | 6               |
| 802 | WAP four-disulfide core domain protein 8 precursor                  | 153946389        | 28         | 3               | 17                    | 6               |
| 803 | ATP synthase subunit e, mitochondrial                               | 6005717          | 8          | 2               | 30                    | 6               |
| 804 | destrin isoform a                                                   | 5802966          | 19         | 2               | 17                    | 6               |
| 805 | tenascin precursor                                                  | 153946395        | 241        | 4               | 2.40                  | 6               |
| 806 | peptidase inhibitor 15 preproprotein                                | 7705676          | 29         | 2               | 10                    | 6               |
| 807 | ferritin light chain                                                | 20149498         | 20         | 2               | 18                    | 6               |
| 808 | cytochrome b5 isoform 1                                             | 41281768         | 15         | 2               | 20                    | 6               |
| 809 | secretoglobin family 1D member 2 precursor                          | 5729909          | 10         | 2               | 22                    | 6               |
| 810 | vesicle-trafficking protein SEC22b precursor                        | 94429050         | 25         | 2               | 15                    | 6               |
| 811 | ATP synthase subunit s, mitochondrial isoform a precursor [Homo     | 51558774         | 25         | 2               | 9.30                  | 6               |
| 812 | cornulin                                                            | 7706635          | 54         | 2               | 9.70                  | 6               |
| 813 | protamine-2                                                         | 68989267         | 13         | 2               | 27                    | 6               |
| 814 | uncharacterized protein C19orf71                                    | 207442677        | 24         | 2               | 14                    | 6               |
| 815 | S-formylglutathione hydrolase                                       | 33413400         | 31         | 2               | 16                    | 6               |
| 816 | cell cycle control protein 50A isoform 1                            | 8922720          | 41         | 3               | 12                    | 6               |
| 817 | cytochrome b5 domain-containing protein 1                           | 40255060         | 27         | 2               | 11                    | 6               |
| 818 | uncharacterized protein LOC100130705                                | 304376316        | 20         | 3               | 19                    | 6               |
| 819 | neutrophil gelatinase-associated lipocalin precursor                | 38455402         | 23         | 4               | 27                    | 6               |
| 820 | protein ALEX XLas                                                   | 117938759        | 111        | 2               | 2.60                  | 6               |
| 821 | transforming protein RhoA precursor                                 | 10835049         | 22         | 3               | 23                    | 6               |
| 822 | 40S ribosomal protein S25                                           | 4506707          | 14         | 2               | 16                    | 6               |
| 823 | ATP5J2-PTCD1 fusion protein                                         | 311893396        | 84         | 2               | 3.20                  | 6               |
| 824 | beta-hexosaminidase subunit alpha preproprotein                     | 189181666        | 61         | 2               | 4.20                  | 6               |
| 825 | 60S ribosomal protein L24                                           | 4506619          | 18         | 2               | 13                    | 6               |
| 826 | out at first protein homolog precursor                              | 30425438         | 31         | 2               | 10                    | 6               |
| 827 | NSFL1 cofactor p47 isoform d                                        | 332078466        | 41         | 2               | 7.00                  | 6               |
| 828 | 26S proteasome non-ATPase regulatory subunit 12 isoform 1           | 4506221          | 53         | 2               | 7.50                  | 5               |
| 829 | hornerin                                                            | 57864582         | 282        | 3               | 2.30                  | 5               |
| 830 | sarcoplasmic/endoplasmic reticulum calcium ATPase 2 isoform b       | 24638454         | 115        | 3               | 4.00                  | 5               |
| 831 | peptidyl-prolyl cis-trans isomerase FKBP4                           | 4503729          | 52         | 2               | 6.10                  | 5               |
| 832 | 26S proteasome non-ATPase regulatory subunit 6                      | 7661914          | 46         | 3               | 11                    | 5               |
| 833 | histone H2A-Bbd type 2/3                                            | 63029935         | 13         | 2               | 30                    | 5               |
| 834 | calpain-1 catalytic subunit                                         | 311893363        | 82         | 2               | 3.10                  | 5               |
| 835 | cytochrome b-c1 complex subunit 6, mitochondrial                    | 83627705         | 11         | 2               | 27                    | 5               |
| 836 | cystatin-S precursor                                                | 4503109          | 16         | 2               | 18                    | 5               |
| 837 | glycyl-tRNA synthetase precursor                                    | 116805340        | 83         | 3               | 4.60                  | 5               |
| 838 | 60S ribosomal protein L7                                            | 15431301         | 29         | 3               | 18                    | 5               |
| 839 | GTP-binding protein SAR1a                                           | 217416369        | 22         | 3               | 15                    | 5               |
| 840 | importin-4                                                          | 62460637         | 119        | 3               | 3.50                  | 5               |

Contd...



**Supplementary Table 4: Contd...**

| No. | Gel 3                                                                                |                  |            |                 |                       |                 |
|-----|--------------------------------------------------------------------------------------|------------------|------------|-----------------|-----------------------|-----------------|
|     | Protein                                                                              | Accession number | Mass (kDa) | Peptides number | Sequence coverage (%) | Spectral counts |
| 841 | CMT1A duplicated region transcript 15 protein                                        | 56090618         | 21         | 2               | 21                    | 5               |
| 842 | translocon-associated protein subunit delta isoform 3 precursor                      | 325301078        | 20         | 2               | 13                    | 5               |
| 843 | apolipoprotein O precursor                                                           | 13129148         | 22         | 2               | 11                    | 5               |
| 844 | thioredoxin domain-containing protein 17                                             | 14249348         | 14         | 2               | 15                    | 5               |
| 845 | UPF0577 protein KIAA1324 precursor                                                   | 38569482         | 111        | 3               | 3.60                  | 5               |
| 846 | homogentisate 1,2-dioxygenase                                                        | 115527117        | 50         | 2               | 8.10                  | 5               |
| 847 | 60S ribosomal protein L11 isoform 1                                                  | 15431290         | 20         | 2               | 13                    | 5               |
| 848 | NADH dehydrogenase [ubiquinone] iron-sulfur protein 4, mitochondrial precursor       | 4505369          | 20         | 3               | 19                    | 5               |
| 849 | ADP-ribosylation factor-like protein 8B                                              | 8922601          | 22         | 3               | 22                    | 5               |
| 850 | uncharacterized protein C22orf43                                                     | 56118955         | 25         | 2               | 9.60                  | 5               |
| 851 | guanine nucleotide-binding protein subunit beta-2-like 1                             | 5174447          | 35         | 2               | 8.50                  | 5               |
| 852 | SPRY domain-containing protein 7 isoform 1                                           | 20531765         | 22         | 3               | 29                    | 5               |
| 853 | B-cell receptor-associated protein 31 isoform a                                      | 213511508        | 35         | 2               | 6.40                  | 5               |
| 854 | endoplasmic reticulum-Golgi intermediate compartment protein 2                       | 50959176         | 43         | 2               | 6.90                  | 5               |
| 855 | ubiquitin carboxyl-terminal hydrolase isozyme L1                                     | 21361091         | 25         | 2               | 14                    | 5               |
| 856 | uncharacterized protein C20orf85                                                     | 30425380         | 16         | 2               | 21                    | 5               |
| 857 | NADH dehydrogenase [ubiquinone] 1 beta subcomplex subunit 8, mitochondrial precursor | 4826854          | 22         | 3               | 21                    | 5               |
| 858 | coiled-coil domain-containing protein 164                                            | 217416374        | 87         | 3               | 4.70                  | 5               |
| 859 | protein phosphatase 1 regulatory subunit 32 isoform 1                                | 283046778        | 47         | 2               | 6.10                  | 5               |
| 860 | outer dense fiber protein 3B                                                         | 116292180        | 27         | 2               | 8.70                  | 5               |
| 861 | 15 selenoprotein isoform 1 precursor                                                 | 42741648         | 18         | 2               | 18                    | 5               |
| 862 | probable ergosterol biosynthetic protein 28                                          | 6005719          | 16         | 2               | 17                    | 5               |
| 863 | SUN domain-containing protein 3                                                      | 71834868         | 41         | 3               | 8.10                  | 5               |
| 864 | uncharacterized protein C1orf194                                                     | 171916088        | 18         | 3               | 36                    | 5               |
| 865 | protein NDRG3 isoform a                                                              | 14165266         | 41         | 3               | 14                    | 5               |
| 866 | 60S ribosomal protein L28 isoform 2                                                  | 13904866         | 16         | 3               | 22                    | 5               |
| 867 | 60S ribosomal protein L14                                                            | 78000181         | 23         | 2               | 11                    | 5               |
| 868 | platelet-activating factor acetylhydrolase IB subunit alpha                          | 4557741          | 47         | 2               | 9.50                  | 5               |
| 869 | up-regulated during skeletal muscle growth protein 5                                 | 14249376         | 6          | 2               | 43                    | 5               |
| 870 | lysozyme-like protein 6 precursor                                                    | 9966905          | 17         | 2               | 24                    | 5               |
| 871 | glycerol kinase isoform a                                                            | 42794763         | 58         | 2               | 6.00                  | 5               |
| 872 | ATP synthase-coupling factor 6, mitochondrial isoform a precursor                    | 18644883         | 13         | 2               | 31                    | 5               |
| 873 | mitochondrial fission 1 protein                                                      | 151108473        | 17         | 3               | 26                    | 5               |
| 874 | protein CutA isoform 1                                                               | 62198241         | 21         | 2               | 21                    | 5               |
| 875 | sperm-associated antigen 11B isoform A preproprotein                                 | 7706551          | 11         | 2               | 19                    | 5               |
| 876 | fibrinogen-like protein 1 precursor                                                  | 42544189         | 36         | 3               | 9.90                  | 5               |
| 877 | thioredoxin domain-containing protein 12 precursor                                   | 7705696          | 19         | 2               | 14                    | 5               |
| 878 | arrestin domain-containing protein 5                                                 | 122937478        | 38         | 2               | 8.20                  | 5               |
| 879 | beta-defensin 105 precursor                                                          | 103485141        | 9          | 2               | 26                    | 5               |
| 880 | protein transport protein Sec61 subunit beta                                         | 5803165          | 10         | 2               | 27                    | 5               |
| 881 | uncharacterized protein LOC145788                                                    | 311771669        | 14         | 3               | 36                    | 5               |
| 882 | cytoskeleton-associated protein 4                                                    | 19920317         | 66         | 2               | 5.60                  | 5               |
| 883 | programmed cell death 6-interacting protein isoform 1                                | 22027538         | 96         | 2               | 3.30                  | 5               |
| 884 | apolipoprotein A-I-binding protein precursor                                         | 91984773         | 32         | 2               | 10                    | 5               |
| 885 | glucosamine-6-phosphate isomerase 1                                                  | 13027378         | 33         | 3               | 13                    | 5               |
| 886 | isoleucyl-tRNA synthetase, cytoplasmic                                               | 94721239         | 145        | 2               | 1.60                  | 5               |
| 887 | histidine triad nucleotide-binding protein 3                                         | 189217863        | 20         | 2               | 13                    | 5               |
| 888 | RIB43A-like with coiled-coils protein 1 isoform 1                                    | 72534784         | 44         | 3               | 16                    | 5               |
| 889 | 40S ribosomal protein S7                                                             | 4506741          | 22         | 2               | 18                    | 5               |
| 890 | reactive oxygen species modulator 1                                                  | 18152785         | 8          | 2               | 35                    | 5               |
| 891 | beta-defensin 106 precursor                                                          | 22748611         | 7          | 2               | 23                    | 5               |
| 892 | lipolysis-stimulated lipoprotein receptor isoform 1                                  | 45505163         | 70         | 2               | 4.60                  | 5               |
| 893 | protein S100-A6                                                                      | 7657532          | 10         | 2               | 17                    | 5               |
| 894 | synaptogyrin-1 isoform 1b                                                            | 22035698         | 21         | 3               | 23                    | 5               |
| 895 | 40S ribosomal protein S28                                                            | 4506715          | 8          | 2               | 30                    | 5               |

*Contd...*

## Supplementary Table 4: Contd...

| No. | Gel 3                                                                              |                  |            |                 |                       |                 |
|-----|------------------------------------------------------------------------------------|------------------|------------|-----------------|-----------------------|-----------------|
|     | Protein                                                                            | Accession number | Mass (kDa) | Peptides number | Sequence coverage (%) | Spectral counts |
| 896 | torsin-1A-interacting protein 1                                                    | 39753957         | 66         | 2               | 4.50                  | 5               |
| 897 | deoxyguanosine kinase, mitochondrial isoform a precursor                           | 18426967         | 32         | 3               | 18                    | 4               |
| 898 | adenylate kinase domain-containing protein 1 isoform 1                             | 237858799        | 221        | 2               | 0.99                  | 4               |
| 899 | glucosamine-fructose-6-phosphate aminotransferase [isomerizing] 1 isoform 1        | 347659028        | 79         | 4               | 8.00                  | 4               |
| 900 | basigin isoform 2 precursor                                                        | 38372925         | 29         | 3               | 16                    | 4               |
| 901 | isovaleryl-CoA dehydrogenase, mitochondrial isoform 1 precursor                    | 226958412        | 47         | 3               | 10                    | 4               |
| 902 | coiled-coil domain-containing protein 151                                          | 117553613        | 69         | 3               | 5.70                  | 4               |
| 903 | matrilin-2 isoform a precursor                                                     | 62548860         | 107        | 2               | 2.70                  | 4               |
| 904 | profilin-2 isoform a                                                               | 16753215         | 15         | 2               | 19                    | 4               |
| 905 | BAG family molecular chaperone regulator 5 isoform b                               | 6631077          | 51         | 2               | 6.00                  | 4               |
| 906 | 40S ribosomal protein S9                                                           | 14141193         | 23         | 2               | 8.80                  | 4               |
| 907 | coiled-coil domain-containing protein 42A isoform 1                                | 226494053        | 38         | 2               | 9.50                  | 4               |
| 908 | 40S ribosomal protein S16                                                          | 4506691          | 16         | 2               | 14                    | 4               |
| 909 | acyl-coenzyme A thioesterase 13 isoform 2                                          | 231567183        | 12         | 2               | 26                    | 4               |
| 910 | vitronectin precursor                                                              | 88853069         | 54         | 2               | 6.50                  | 4               |
| 911 | thiosulfate sulfurtransferase/rhodanese-like domain-containing protein 1 isoform 1 | 163965377        | 13         | 2               | 20                    | 4               |
| 912 | titin isoform N2-A                                                                 | 291045225        | 3713       | 2               | 0.05                  | 4               |
| 913 | 60S ribosomal protein L22 proprotein                                               | 4506613          | 15         | 2               | 19                    | 4               |
| 914 | 40S ribosomal protein S20 isoform 1                                                | 226246671        | 16         | 2               | 19                    | 4               |
| 915 | protein sel-1 homolog 1 isoform 1 precursor                                        | 19923669         | 89         | 2               | 4.90                  | 4               |
| 916 | L-amino-acid oxidase isoform 2 precursor                                           | 27477089         | 65         | 3               | 9.20                  | 4               |
| 917 | chitinase domain-containing protein 1 isoform a                                    | 218083142        | 45         | 2               | 9.70                  | 4               |
| 918 | coiled-coil domain-containing protein 40 isoform 1                                 | 148664197        | 130        | 3               | 3.00                  | 4               |
| 919 | platelet-activating factor acetylhydrolase precursor                               | 270133071        | 50         | 2               | 9.80                  | 4               |
| 920 | glutathione S-transferase omega-2 isoform 1                                        | 38016131         | 28         | 2               | 9.50                  | 4               |
| 921 | ethanolamine-phosphate cytidyltransferase isoform 1                                | 296841136        | 46         | 2               | 6.90                  | 4               |
| 922 | mitochondrial 2-oxoglutarate/malate carrier protein isoform 1                      | 21361114         | 34         | 2               | 7.00                  | 4               |
| 923 | vesicle-associated membrane protein 8                                              | 14043026         | 11         | 2               | 23                    | 4               |
| 924 | cytochrome c oxidase subunit 7C, mitochondrial precursor                           | 4502993          | 7          | 2               | 29                    | 4               |
| 925 | eukaryotic translation initiation factor 3 subunit K                               | 10801345         | 25         | 2               | 11                    | 4               |
| 926 | proactivator polypeptide isoform a preproprotein                                   | 11386147         | 58         | 2               | 3.40                  | 4               |
| 927 | transmembrane emp24 domain-containing protein 1 precursor                          | 5803040          | 25         | 2               | 12                    | 4               |
| 928 | iron-sulfur cluster assembly enzyme ISCU, mitochondrial isoform ISCU2 precursor    | 56699456         | 18         | 2               | 16                    | 4               |
| 929 | COP9 signalosome complex subunit 7b                                                | 12232385         | 30         | 2               | 10                    | 4               |
| 930 | PITH domain-containing protein 1                                                   | 21361837         | 24         | 2               | 18                    | 4               |
| 931 | 40S ribosomal protein S27                                                          | 4506711          | 9          | 2               | 25                    | 4               |
| 932 | uncharacterized protein C6orf163                                                   | 256600247        | 39         | 2               | 9.10                  | 4               |
| 933 | beta-defensin 126 preproprotein                                                    | 13624333         | 12         | 2               | 8.10                  | 4               |
| 934 | uncharacterized protein C2orf77                                                    | 146260271        | 66         | 3               | 6.70                  | 4               |
| 935 | uncharacterized protein C2orf74 isoform 1                                          | 221139892        | 22         | 2               | 18                    | 4               |
| 936 | uncharacterized protein C7orf72                                                    | 332634960        | 50         | 2               | 11                    | 4               |
| 937 | suppressor of G2 allele of SKP1 homolog isoform SGT1B [Homo                        | 195963398        | 41         | 3               | 11                    | 4               |
| 938 | 40S ribosomal protein S12                                                          | 14277700         | 15         | 2               | 14                    | 4               |
| 939 | acetyl-CoA acetyltransferase, cytosolic                                            | 148539872        | 41         | 2               | 7.80                  | 4               |
| 940 | exportin-2                                                                         | 29029559         | 110        | 2               | 2.40                  | 4               |
| 941 | 60S acidic ribosomal protein P1 isoform 1                                          | 4506669          | 12         | 2               | 57                    | 4               |
| 942 | biglycan preproprotein                                                             | 4502403          | 42         | 2               | 8.70                  | 4               |
| 943 | uncharacterized protein C19orf18 precursor                                         | 22748999         | 24         | 2               | 9.80                  | 4               |
| 944 | retinoic acid receptor responder protein 1 isoform 2 precursor                     | 46255041         | 26         | 2               | 9.60                  | 4               |
| 945 | uncharacterized protein C2orf61 isoform 1                                          | 254675143        | 28         | 2               | 13                    | 4               |
| 946 | dickkopf-like protein 1 isoform 2 precursor                                        | 308818218        | 24         | 2               | 9.50                  | 4               |
| 947 | actin-related protein 2/3 complex subunit 4 isoform c                              | 311771647        | 22         | 2               | 11                    | 4               |
| 948 | glutaminy-peptide cyclotransferase precursor                                       | 6912618          | 41         | 2               | 6.90                  | 4               |
| 949 | UPF0573 protein C2orf70                                                            | 157502167        | 23         | 2               | 17                    | 4               |
| 950 | ubiquitin-conjugating enzyme E2 variant 1 isoform d                                | 73765546         | 16         | 2               | 18                    | 4               |

Contd...

Supplementary Table 4: Contd...

| No.  | Gel 3                                                                                 |                  |            |                 |                       |                 |
|------|---------------------------------------------------------------------------------------|------------------|------------|-----------------|-----------------------|-----------------|
|      | Protein                                                                               | Accession number | Mass (kDa) | Peptides number | Sequence coverage (%) | Spectral counts |
| 951  | 40S ribosomal protein S11                                                             | 4506681          | 18         | 2               | 11                    | 4               |
| 952  | 60S ribosomal protein L30                                                             | 4506631          | 13         | 3               | 31                    | 4               |
| 953  | transketolase                                                                         | 205277463        | 68         | 3               | 9.50                  | 4               |
| 954  | tropomyosin alpha-4 chain isoform 1                                                   | 223555975        | 33         | 2               | 8.10                  | 4               |
| 955  | disintegrin and metalloproteinase domain-containing protein 32                        | 148664238        | 88         | 2               | 3.30                  | 4               |
| 956  | 60S ribosomal protein L35a                                                            | 16117791         | 13         | 3               | 22                    | 4               |
| 957  | inorganic pyrophosphatase                                                             | 11056044         | 33         | 3               | 18                    | 4               |
| 958  | phosphatidylinositol-5-phosphate 4-kinase type-2 gamma isoform a                      | 226371739        | 47         | 3               | 11                    | 4               |
| 959  | prostaglandin reductase 1 isoform 1                                                   | 226059133        | 36         | 2               | 5.50                  | 4               |
| 960  | 2-oxoisovalerate dehydrogenase subunit alpha, mitochondrial isoform                   | 11386135         | 50         | 2               | 8.50                  | 4               |
| 961  | nucleoporin NDC1 isoform 1                                                            | 271398350        | 76         | 2               | 4.70                  | 4               |
| 962  | cytochrome b-c1 complex subunit 9 isoform a                                           | 41281885         | 7          | 2               | 38                    | 4               |
| 963  | NADH dehydrogenase [ubiquinone] 1 beta subcomplex subunit 11, mitochondrial isoform 1 | 20127561         | 18         | 2               | 11                    | 4               |
| 964  | NADH dehydrogenase [ubiquinone] 1 beta subcomplex subunit 9 isoform                   | 6274550          | 22         | 2               | 16                    | 4               |
| 965  | phosphatidylinositol transfer protein alpha isoform                                   | 5453908          | 32         | 2               | 13                    | 4               |
| 966  | ran guanine nucleotide release factor isoform B                                       | 295317377        | 16         | 2               | 21                    | 4               |
| 967  | dehydrogenase/reductase SDR family member 7B                                          | 20149619         | 35         | 2               | 8.90                  | 4               |
| 968  | isochorismatase domain-containing protein 1                                           | 103471987        | 32         | 2               | 9.70                  | 4               |
| 969  | ubiquitin-conjugating enzyme E2 N                                                     | 4507793          | 17         | 2               | 23                    | 3               |
| 970  | serine/threonine-protein phosphatase with EF-hands 1 isoform 1b                       | 23312374         | 73         | 2               | 4.60                  | 3               |
| 971  | thioredoxin reductase 2, mitochondrial precursor                                      | 22035672         | 57         | 3               | 13                    | 3               |
| 972  | non-specific lipid-transfer protein isoform 1 proprotein                              | 19923233         | 59         | 2               | 4.20                  | 3               |
| 973  | DNA damage-binding protein 1                                                          | 148529014        | 127        | 2               | 1.80                  | 3               |
| 974  | 60S ribosomal protein L23                                                             | 4506605          | 15         | 2               | 17                    | 3               |
| 975  | protein FAM162A                                                                       | 49355721         | 17         | 2               | 20                    | 3               |
| 976  | prostate and testis expressed protein 2 precursor                                     | 47086459         | 13         | 3               | 29                    | 3               |
| 977  | poly (rC)-binding protein 2 isoform b                                                 | 14141166         | 38         | 2               | 9.70                  | 3               |
| 978  | vacuolar protein sorting-associated protein 13A isoform A                             | 66346674         | 360        | 2               | 0.85                  | 3               |
| 979  | NADH dehydrogenase [ubiquinone] 1 alpha subcomplex subunit 5                          | 4826848          | 13         | 2               | 8.60                  | 3               |
| 980  | clathrin light chain A isoform a                                                      | 4502899          | 24         | 2               | 14                    | 3               |
| 981  | protein BRICK1                                                                        | 27544939         | 9          | 2               | 28                    | 3               |
| 982  | neuropilin-1 isoform a precursor                                                      | 182508169        | 103        | 2               | 3.40                  | 3               |
| 983  | kinesin-1 heavy chain                                                                 | 4758648          | 110        | 2               | 2.60                  | 3               |
| 984  | dnaJ homolog subfamily C member 3 precursor                                           | 5453980          | 58         | 2               | 10                    | 3               |
| 985  | nucleosome assembly protein 1-like 1                                                  | 4758756          | 45         | 2               | 6.10                  | 3               |
| 986  | metaxin-2                                                                             | 5729937          | 30         | 2               | 11                    | 3               |
| 987  | NADH dehydrogenase [ubiquinone] iron-sulfur protein 5                                 | 4758790          | 13         | 2               | 18                    | 3               |
| 988  | myosin-VI                                                                             | 92859701         | 149        | 2               | 1.90                  | 3               |
| 989  | ribose-phosphate pyrophosphokinase 2 isoform 2                                        | 4506129          | 35         | 3               | 11                    | 3               |
| 990  | cartilage acidic protein 1 isoform B precursor                                        | 330688397        | 70         | 2               | 6.70                  | 3               |
| 991  | polyadenylate-binding protein 1                                                       | 46367787         | 71         | 3               | 5.80                  | 3               |
| 992  | importin subunit alpha-4                                                              | 34485722         | 58         | 2               | 7.30                  | 3               |
| 993  | peptidyl-prolyl cis-trans isomerase FKBP2 precursor                                   | 17149842         | 16         | 2               | 18                    | 3               |
| 994  | secreted frizzled-related protein 1 precursor                                         | 56117838         | 35         | 2               | 8.90                  | 3               |
| 995  | eukaryotic translation initiation factor 3 subunit M                                  | 23397429         | 43         | 2               | 8.00                  | 3               |
| 996  | heat shock protein beta-11                                                            | 118343647        | 16         | 2               | 28                    | 3               |
| 997  | nodal modulator 3 precursor                                                           | 51944969         | 134        | 2               | 2.00                  | 3               |
| 998  | actin-related protein 2 isoform b                                                     | 5031571          | 45         | 2               | 7.40                  | 3               |
| 999  | peptidase M20 domain-containing protein 2                                             | 58082085         | 48         | 2               | 7.60                  | 3               |
| 1000 | prostaglandin-H2 D-isomerase precursor                                                | 32171249         | 21         | 2               | 12                    | 3               |
| 1001 | annexin A13 isoform a                                                                 | 51895795         | 35         | 2               | 8.20                  | 3               |
| 1002 | low-density lipoprotein receptor-related protein 2 precursor                          | 126012573        | 522        | 2               | 0.49                  | 3               |
| 1003 | 6-phosphofructokinase, liver type                                                     | 48762920         | 85         | 2               | 3.60                  | 3               |
| 1004 | IanC-like protein 1                                                                   | 212274337        | 45         | 2               | 6.30                  | 3               |
| 1005 | amyloid beta A4 protein isoform d                                                     | 209862833        | 85         | 2               | 3.50                  | 3               |

Contd...

Supplementary Table 4: Contd...

| No.  | Protein                                                                           | Gel 3            |            |                 |                       |                 |
|------|-----------------------------------------------------------------------------------|------------------|------------|-----------------|-----------------------|-----------------|
|      |                                                                                   | Accession number | Mass (kDa) | Peptides number | Sequence coverage (%) | Spectral counts |
| 1006 | serine/threonine-protein phosphatase 2B catalytic subunit gamma isoform isoform 1 | 345842412        | 59         | 2               | 5.60                  | 3               |
| 1007 | long-chain-fatty-acid--CoA ligase 3                                               | 42794752         | 80         | 2               | 4.20                  | 3               |
| 1008 | transforming growth factor beta receptor type 3 isoform b precursor               | 307574634        | 93         | 2               | 4.10                  | 3               |
| 1009 | actin-related protein 2/3 complex subunit 3                                       | 5031597          | 21         | 2               | 13                    | 3               |
| 1010 | beta-1,4-galactosyltransferase 1                                                  | 13929462         | 44         | 2               | 6.80                  | 3               |
| 1011 | 60S ribosomal protein L29                                                         | 4506629          | 18         | 2               | 14                    | 3               |
| 1012 | ubiquitin carboxyl-terminal hydrolase 7                                           | 150378533        | 128        | 2               | 2.70                  | 2               |
| 1013 | ATP synthase subunit delta, mitochondrial precursor                               | 50345991         | 17         | 2               | 14                    | 2               |
| 1014 | F-actin-capping protein subunit alpha-2                                           | 5453599          | 33         | 2               | 12                    | 2               |
| 1015 | quinone oxidoreductase isoform a                                                  | 13236495         | 35         | 2               | 7.90                  | 2               |
| 1016 | ras-related protein Rab-18                                                        | 10880989         | 23         | 2               | 12                    | 2               |
| 1017 | 4F2 cell-surface antigen heavy chain isoform c                                    | 65506891         | 68         | 2               | 4.10                  | 2               |
| 1018 | hsp90 co-chaperone Cdc37                                                          | 5901922          | 44         | 2               | 11                    | 2               |
| 1019 | mannosyl-oligosaccharide glucosidase isoform 1                                    | 149999606        | 92         | 2               | 3.60                  | 2               |
| 1020 | BAG family molecular chaperone regulator 2                                        | 4757834          | 24         | 2               | 11                    | 2               |
| 1021 | zona pellucida-binding protein 2 isoform 1 precursor                              | 84875535         | 36         | 2               | 7.30                  | 2               |
| 1022 | proliferation-associated protein 2G4                                              | 124494254        | 44         | 2               | 8.60                  | 2               |
| 1023 | prostate and testis expressed protein 4                                           | 221554530        | 11         | 2               | 23                    | 2               |
| 1024 | Na(+)/H(+) exchange regulatory cofactor NHE-RF1                                   | 4759140          | 39         | 2               | 6.70                  | 2               |
| 1025 | SPARC-related modular calcium-binding protein 1 isoform 2 precursor               | 11545873         | 48         | 2               | 5.50                  | 2               |
| 1026 | glutaredoxin-3                                                                    | 95113651         | 37         | 2               | 15                    | 2               |
| 1027 | 60S ribosomal protein L13 isoform 1                                               | 15431295         | 24         | 2               | 9.00                  | 2               |
| 1028 | NADPH--cytochrome P450 reductase                                                  | 127139033        | 77         | 2               | 4.90                  | 2               |
| 1029 | aminoacyl tRNA synthase complex-interacting multifunctional protein 2             | 11125770         | 35         | 2               | 11                    | 2               |
| 1030 | nesprin-1 isoform 1                                                               | 330688408        | 1011       | 2               | 0.33                  | 2               |
| 1031 | coiled-coil domain-containing protein 11                                          | 94721321         | 62         | 2               | 7.20                  | 2               |
| 1032 | cadherin EGF LAG seven-pass G-type receptor 1 precursor                           | 7656967          | 329        | 2               | 1.00                  | 2               |
| 1033 | AMY-1-associating protein expressed in testis 1                                   | 38569419         | 90         | 2               | 3.10                  | 2               |
| 1034 | dnaJ homolog subfamily C member 5                                                 | 45504382         | 22         | 2               | 8.60                  | 2               |
| 1035 | endoribonuclease Dicer isoform 1                                                  | 29294651         | 219        | 2               | 1.20                  | 2               |
| 1036 | ATP-binding cassette sub-family B member 6, mitochondrial                         | 9955963          | 94         | 2               | 3.30                  | 2               |
| 1037 | septin-10 isoform 1                                                               | 21945064         | 53         | 2               | 6.20                  | 2               |
| 1038 | tetratricopeptide repeat protein 18                                               | 229577238        | 126        | 2               | 2.10                  | 2               |
| 1039 | peptidyl-prolyl cis-trans isomerase FKBP3                                         | 4503727          | 25         | 2               | 12                    | 2               |
| 1040 | prostate and testis expressed protein 3 precursor                                 | 222136622        | 12         | 2               | 16                    | 2               |
| 1041 | calcineurin subunit B type 1                                                      | 4506025          | 19         | 2               | 29                    | 2               |
| 1042 | haloacid dehalogenase-like hydrolase domain- containing protein 2                 | 14149777         | 29         | 2               | 14                    | 2               |
