# Supplementary material for: Spermatozoa protein alterations in infertile men with bilateral varicocele
Source: PubMed Central journal article supplement — Asian J Androl. 2015 May 22;18(1):43–53. doi: 10.4103/1008-682X.153848 (PMC4736356; doi:10.4103/1008-682x.153848), 2015-05-22
Supplement: AJA-18-43_Suppl5.pdf [file AJA-18-43_Suppl5.pdf]

**Supplementary Table 5: Proteomic profile of run 1 of the bilateral varicocele group proteins showing peptide number and peptide coverage**

| <i>No</i> | <i>Protein</i>                            | <i>Accession number</i> | <i>Mass (kDa)</i> | <i>Peptides number</i> | <i>Sequence coverage (%)</i> | <i>Spectral counts</i> |
|-----------|-------------------------------------------|-------------------------|-------------------|------------------------|------------------------------|------------------------|
| 1         | fibronectin isoform 3 preproprotein       | 16933542                | 259               | 150                    | 69                           | 1881                   |
| 2         | semenogelin-2 precursor                   | 4506885                 | 65                | 51                     | 65                           | 1598                   |
| 3         | semenogelin-1 preproprotein               | 4506883                 | 52                | 70                     | 77                           | 1544                   |
| 4         | A-kinase anchor protein 4 isoform 2       | 21493039                | 93                | 73                     | 77                           | 1377                   |
| 5         | lactotransferrin isoform 1 precursor      | 54607120                | 78                | 73                     | 81                           | 1254                   |
| 6         | tubulin beta-4B chain                     | 5174735                 | 50                | 34                     | 76                           | 907                    |
| 7         | tubulin alpha-3C/D chain                  | 17921993                | 50                | 30                     | 74                           | 705                    |
| 8         | actin, cytoplasmic 1                      | 4501885                 | 42                | 34                     | 81                           | 698                    |
| 9         | A-kinase anchor protein 3                 | 21493041                | 95                | 54                     | 58                           | 641                    |
| 10        | heat shock-related 70 protein 2           | 13676857                | 70                | 42                     | 66                           | 617                    |
| 11        | heat shock protein HSP 90-alpha isoform 1 | 153792590               | 98                | 53                     | 45                           | 602                    |
| 12        | 78 glucose-regulated protein precursor    | 16507237                | 72                | 36                     | 52                           | 519                    |
| 13        | endoplasmic precursor                     | 4507677                 | 92                | 57                     | 63                           | 517                    |
| 14        | clusterin preproprotein                   | 355594753               | 52                | 26                     | 47                           | 514                    |
| 15        | myosin-9                                  | 12667788                | 227               | 108                    | 49                           | 510                    |

*Contd...*

Supplementary Table 5: Contd...

| No | Protein                                                              | Accession number | Mass (kDa) | Peptides number | Sequence coverage (%) | Spectral counts |
|----|----------------------------------------------------------------------|------------------|------------|-----------------|-----------------------|-----------------|
| 16 | pyruvate kinase isozymes M1/M2 isoform c                             | 332164775        | 66         | 40              | 63                    | 507             |
| 17 | fatty acid synthase                                                  | 41872631         | 273        | 75              | 28                    | 475             |
| 18 | heat shock protein HSP 90-beta                                       | 20149594         | 83         | 29              | 45                    | 457             |
| 19 | heat shock cognate 71 protein isoform 1                              | 5729877          | 71         | 21              | 54                    | 450             |
| 20 | pyruvate kinase isozymes M1/M2 isoform a                             | 33286418         | 58         | 3               | 66                    | 442             |
| 21 | tubulin beta chain                                                   | 29788785         | 50         | 3               | 64                    | 441             |
| 22 | keratin, type II cytoskeletal 1                                      | 119395750        | 66         | 40              | 44                    | 428             |
| 23 | tubulin alpha-1A chain                                               | 17986283         | 50         | 4               | 66                    | 407             |
| 24 | prostatic acid phosphatase isoform TM-PAP precursor                  | 197116348        | 48         | 25              | 53                    | 402             |
| 25 | ATP synthase subunit beta, mitochondrial precursor                   | 32189394         | 57         | 28              | 74                    | 389             |
| 26 | outer dense fiber protein 2 isoform 3                                | 310750406        | 81         | 33              | 44                    | 371             |
| 27 | heat shock 70 protein 1A/1B                                          | 194248072        | 70         | 17              | 54                    | 363             |
| 28 | heat shock 70 protein 1-like                                         | 124256496        | 70         | 24              | 52                    | 335             |
| 29 | keratin, type I cytoskeletal 10                                      | 195972866        | 59         | 33              | 50                    | 334             |
| 30 | prolactin-inducible protein precursor                                | 4505821          | 17         | 16              | 77                    | 324             |
| 31 | protein disulfide-isomerase A3 precursor                             | 21361657         | 57         | 34              | 63                    | 324             |
| 32 | annexin A6 isoform 1                                                 | 71773329         | 76         | 44              | 67                    | 322             |
| 33 | glyceraldehyde-3-phosphate dehydrogenase, testis-specific            | 7657116          | 45         | 21              | 64                    | 308             |
| 34 | alpha-enolase isoform 1                                              | 4503571          | 47         | 34              | 77                    | 306             |
| 35 | keratin, type I cytoskeletal 9                                       | 55956899         | 62         | 33              | 53                    | 303             |
| 36 | annexin A5                                                           | 4502107          | 36         | 32              | 81                    | 298             |
| 37 | elongation factor 1-alpha 1                                          | 4503471          | 50         | 24              | 58                    | 293             |
| 38 | annexin A2 isoform 1                                                 | 50845388         | 40         | 31              | 69                    | 283             |
| 39 | protein-glutamine gamma-glutamyltransferase 4                        | 156627577        | 77         | 42              | 65                    | 280             |
| 40 | fructose-bisphosphate aldolase A isoform 2                           | 342187211        | 45         | 32              | 78                    | 273             |
| 41 | tubulin alpha-1C chain                                               | 14389309         | 50         | 2               | 62                    | 270             |
| 42 | keratin, type II cytoskeletal 2 epidermal                            | 47132620         | 65         | 31              | 46                    | 268             |
| 43 | aminopeptidase N precursor                                           | 157266300        | 110        | 52              | 50                    | 257             |
| 44 | triosephosphate isomerase isoform 2                                  | 226529917        | 31         | 22              | 86                    | 254             |
| 45 | plastin-2                                                            | 167614506        | 70         | 38              | 67                    | 252             |
| 46 | ropporin-1A                                                          | 21359920         | 24         | 14              | 74                    | 250             |
| 47 | heat shock protein beta-1                                            | 4504517          | 23         | 21              | 90                    | 248             |
| 48 | phosphoglycerate kinase 2                                            | 31543397         | 45         | 29              | 84                    | 238             |
| 49 | creatine kinase B-type                                               | 21536286         | 43         | 19              | 68                    | 227             |
| 50 | calcium-binding tyrosine phosphorylation-regulated protein isoform c | 24797112         | 41         | 20              | 62                    | 219             |
| 51 | hypoxia up-regulated protein 1 precursor                             | 5453832          | 111        | 37              | 43                    | 219             |
| 52 | dipeptidyl peptidase 4                                               | 18765694         | 88         | 36              | 47                    | 218             |
| 53 | calcium-binding tyrosine phosphorylation-regulated protein isoform a | 24797108         | 53         | 5               | 41                    | 211             |
| 54 | annexin A1                                                           | 4502101          | 39         | 25              | 64                    | 206             |
| 55 | T-complex protein 1 subunit beta isoform 1                           | 5453603          | 57         | 32              | 62                    | 202             |
| 56 | protein disulfide-isomerase precursor                                | 20070125         | 57         | 32              | 59                    | 199             |
| 57 | prostate-specific antigen isoform 1 preproprotein                    | 4502173          | 29         | 15              | 69                    | 197             |
| 58 | ATP synthase subunit alpha, mitochondrial precursor                  | 4757810          | 60         | 25              | 49                    | 195             |
| 59 | ruvB-like 2                                                          | 5730023          | 51         | 32              | 65                    | 192             |
| 60 | acetyl-CoA acetyltransferase, mitochondrial precursor                | 4557237          | 45         | 24              | 56                    | 171             |
| 61 | sorbitol dehydrogenase                                               | 156627571        | 38         | 18              | 59                    | 167             |
| 62 | hexokinase-1 isoform HKI-ta/tb                                       | 15991831         | 103        | 32              | 34                    | 163             |
| 63 | elongation factor 2                                                  | 4503483          | 95         | 33              | 33                    | 159             |
| 64 | glyceraldehyde-3-phosphate dehydrogenase                             | 7669492          | 36         | 15              | 64                    | 158             |
| 65 | 60 heat shock protein, mitochondrial                                 | 31542947         | 61         | 26              | 54                    | 157             |
| 66 | transitional endoplasmic reticulum ATPase                            | 6005942          | 89         | 30              | 47                    | 156             |
| 67 | leucine-rich repeat-containing protein 37B precursor                 | 53829385         | 106        | 21              | 21                    | 154             |
| 68 | glutathione S-transferase Mu 3                                       | 23065552         | 27         | 16              | 58                    | 152             |
| 69 | clathrin heavy chain 1                                               | 4758012          | 192        | 39              | 25                    | 152             |
| 70 | neutral alpha-glucosidase AB isoform 2 precursor                     | 38202257         | 107        | 29              | 32                    | 152             |

Contd...

Supplementary Table 5: Contd...

| No  | Protein                                                                              | Accession number | Mass (kDa) | Peptides number | Sequence coverage (%) | Spectral counts |
|-----|--------------------------------------------------------------------------------------|------------------|------------|-----------------|-----------------------|-----------------|
| 71  | ropporin-1B                                                                          | 59891409         | 24         | 4               | 73                    | 151             |
| 72  | malate dehydrogenase, mitochondrial precursor                                        | 21735621         | 36         | 18              | 64                    | 147             |
| 73  | fumarate hydratase, mitochondrial                                                    | 19743875         | 55         | 22              | 55                    | 146             |
| 74  | nuclear pore membrane glycoprotein 210-like isoform 1 precursor                      | 117414168        | 211        | 50              | 34                    | 143             |
| 75  | T-complex protein 1 subunit gamma isoform a                                          | 63162572         | 61         | 26              | 60                    | 143             |
| 76  | tektin-3                                                                             | 13994250         | 57         | 20              | 52                    | 139             |
| 77  | calnexin precursor                                                                   | 10716563         | 68         | 26              | 44                    | 139             |
| 78  | angiotensin-converting enzyme isoform 1 precursor                                    | 4503273          | 150        | 31              | 29                    | 137             |
| 79  | tubulin beta-4A chain                                                                | 21361322         | 50         | 2               | 54                    | 136             |
| 80  | ruvB-like 1                                                                          | 4506753          | 50         | 18              | 55                    | 135             |
| 81  | myeloperoxidase precursor                                                            | 4557759          | 84         | 34              | 41                    | 134             |
| 82  | peroxiredoxin-6                                                                      | 4758638          | 25         | 16              | 72                    | 134             |
| 83  | T-complex protein 1 subunit theta                                                    | 48762932         | 60         | 22              | 48                    | 133             |
| 84  | sperm acrosome membrane-associated protein 1 precursor                               | 13569934         | 32         | 9               | 39                    | 132             |
| 85  | ras-related protein Rab-2A isoform a                                                 | 4506365          | 24         | 14              | 67                    | 132             |
| 86  | 14-3-3 protein epsilon                                                               | 5803225          | 29         | 20              | 62                    | 131             |
| 87  | uncharacterized protein C1orf56 precursor                                            | 20149646         | 37         | 12              | 48                    | 131             |
| 88  | T-complex protein 1 subunit delta                                                    | 38455427         | 58         | 21              | 48                    | 129             |
| 89  | zona pellucida-binding protein 1 isoform 1 precursor                                 | 229577313        | 40         | 18              | 53                    | 127             |
| 90  | cysteine-rich secretory protein 1 isoform 1 precursor                                | 327315372        | 28         | 14              | 69                    | 123             |
| 91  | T-complex protein 1 subunit alpha isoform a                                          | 57863257         | 60         | 21              | 56                    | 122             |
| 92  | cytosolic non-specific dipeptidase isoform 1                                         | 271398239        | 53         | 22              | 63                    | 121             |
| 93  | calreticulin precursor                                                               | 4757900          | 48         | 19              | 63                    | 120             |
| 94  | cathelicidin antimicrobial peptide preproprotein                                     | 348041314        | 20         | 12              | 51                    | 120             |
| 95  | peroxiredoxin-1                                                                      | 320461711        | 22         | 15              | 75                    | 119             |
| 96  | tubulin beta-3 chain isoform 1                                                       | 50592996         | 50         | 2               | 32                    | 119             |
| 97  | acrosin-binding protein precursor                                                    | 17999524         | 61         | 17              | 37                    | 118             |
| 98  | saccharopine dehydrogenase-like oxidoreductase                                       | 55770836         | 47         | 14              | 53                    | 116             |
| 99  | elongation factor 1-gamma                                                            | 4503481          | 50         | 17              | 38                    | 114             |
| 100 | sperm protein associated with the nucleus on the X chromosome C                      | 13435137         | 11         | 7               | 78                    | 113             |
| 101 | lipoprotein lipase precursor                                                         | 4557727          | 53         | 17              | 45                    | 113             |
| 102 | leucine-rich repeat-containing protein 37A precursor                                 | 289547512        | 188        | 19              | 7.50                  | 112             |
| 103 | L-lactate dehydrogenase C chain                                                      | 4504973          | 36         | 20              | 69                    | 111             |
| 104 | T-complex protein 1 subunit epsilon                                                  | 24307939         | 60         | 20              | 48                    | 110             |
| 105 | annexin A3                                                                           | 4826643          | 36         | 21              | 65                    | 109             |
| 106 | trifunctional enzyme subunit beta, mitochondrial precursor                           | 4504327          | 51         | 22              | 47                    | 109             |
| 107 | phospholipid hydroperoxide glutathione peroxidase, mitochondrial isoform A precursor | 75709200         | 22         | 14              | 59                    | 108             |
| 108 | gastricsin isoform 1 preproprotein                                                   | 4505757          | 42         | 5               | 12                    | 108             |
| 109 | serum albumin preproprotein                                                          | 4502027          | 69         | 28              | 54                    | 106             |
| 110 | 14-3-3 protein zeta/delta                                                            | 4507953          | 28         | 10              | 53                    | 106             |
| 111 | sperm protein associated with the nucleus on the X chromosome B/F                    | 22027492         | 12         | 6               | 80                    | 104             |
| 112 | matrix-remodeling-associated protein 5 precursor                                     | 139948432        | 312        | 32              | 12                    | 103             |
| 113 | long-chain-fatty-acid--CoA ligase 1                                                  | 40807491         | 78         | 22              | 26                    | 102             |
| 114 | phosphoglycerate kinase 1                                                            | 4505763          | 45         | 11              | 53                    | 100             |
| 115 | D-3-phosphoglycerate dehydrogenase                                                   | 23308577         | 57         | 12              | 28                    | 99              |
| 116 | tektin-2                                                                             | 16507950         | 50         | 21              | 53                    | 98              |
| 117 | keratin, type II cytoskeletal 5                                                      | 119395754        | 62         | 13              | 26                    | 97              |
| 118 | keratin, type I cytoskeletal 14                                                      | 15431310         | 52         | 8               | 24                    | 96              |
| 119 | radial spoke head protein 6 homolog A                                                | 13540559         | 81         | 15              | 36                    | 94              |
| 120 | filamin-B isoform 2                                                                  | 105990514        | 278        | 37              | 20                    | 93              |
| 121 | succinate dehydrogenase [ubiquinone] flavoprotein subunit, mitochondrial             | 156416003        | 73         | 18              | 35                    | 91              |
| 122 | pyruvate dehydrogenase E1 component subunit beta, mitochondrial isoform 1 precursor  | 156564403        | 39         | 13              | 46                    | 88              |
| 123 | cytochrome c oxidase subunit 4 isoform 1, mitochondrial precursor                    | 4502981          | 20         | 15              | 54                    | 86              |
| 124 | eZRin                                                                                | 21614499         | 69         | 19              | 21                    | 86              |
| 125 | myosin-10                                                                            | 41406064         | 229        | 25              | 21                    | 86              |

Contd...

Supplementary Table 5: Contd...

| No  | Protein                                                                             | Accession number | Mass (kDa) | Peptides number | Sequence coverage (%) | Spectral counts |
|-----|-------------------------------------------------------------------------------------|------------------|------------|-----------------|-----------------------|-----------------|
| 126 | isocitrate dehydrogenase [NADP] cytoplasmic                                         | 28178825         | 47         | 17              | 33                    | 85              |
| 127 | cytochrome b-c1 complex subunit 2, mitochondrial precursor                          | 50592988         | 48         | 17              | 45                    | 84              |
| 128 | aconitate hydratase, mitochondrial precursor                                        | 4501867          | 85         | 19              | 24                    | 82              |
| 129 | laminin subunit beta-2 precursor                                                    | 119703755        | 196        | 25              | 19                    | 81              |
| 130 | T-complex protein 1 subunit eta isoform a                                           | 5453607          | 59         | 17              | 37                    | 81              |
| 131 | izumo sperm-egg fusion protein 4 isoform 1 precursor                                | 89903025         | 24         | 8               | 50                    | 81              |
| 132 | epididymal sperm-binding protein 1 precursor                                        | 301601648        | 26         | 9               | 48                    | 80              |
| 133 | cytoplasmic dynein 1 heavy chain 1                                                  | 33350932         | 532        | 32              | 5.80                  | 80              |
| 134 | myosin light polypeptide 6 isoform 2                                                | 88999583         | 17         | 11              | 84                    | 80              |
| 135 | histone H2B type 1-A                                                                | 24586679         | 14         | 8               | 45                    | 79              |
| 136 | cytochrome c oxidase subunit 5A, mitochondrial precursor                            | 190885499        | 17         | 11              | 71                    | 79              |
| 137 | uncharacterized protein KIAA1683 isoform a                                          | 224451032        | 147        | 25              | 22                    | 79              |
| 138 | T-complex protein 1 subunit zeta isoform a                                          | 4502643          | 58         | 18              | 33                    | 79              |
| 139 | doilychyl-diphosphooligosaccharide--protein glycosyltransferase subunit 1 precursor | 4506675          | 69         | 20              | 45                    | 78              |
| 140 | peptidyl-prolyl cis-trans isomerase A                                               | 10863927         | 18         | 13              | 62                    | 77              |
| 141 | alpha-crystallin B chain                                                            | 4503057          | 20         | 12              | 55                    | 77              |
| 142 | L-asparaginase                                                                      | 145275200        | 32         | 13              | 49                    | 75              |
| 143 | 14-3-3 protein theta                                                                | 5803227          | 28         | 11              | 49                    | 74              |
| 144 | glutamine synthetase                                                                | 19923206         | 42         | 11              | 24                    | 72              |
| 145 | ubiquitin-like modifier-activating enzyme 1                                         | 23510340         | 118        | 17              | 15                    | 72              |
| 146 | cofilin-1                                                                           | 5031635          | 19         | 11              | 63                    | 72              |
| 147 | 14-3-3 protein sigma                                                                | 5454052          | 28         | 11              | 45                    | 72              |
| 148 | keratin, type II cytoskeletal 6A                                                    | 5031839          | 60         | 7               | 23                    | 71              |
| 149 | actin-related protein T2                                                            | 29893808         | 42         | 11              | 36                    | 71              |
| 150 | anterior gradient protein 2 homolog precursor                                       | 5453541          | 20         | 9               | 53                    | 71              |
| 151 | agnin precursor                                                                     | 54873613         | 215        | 25              | 17                    | 70              |
| 152 | histone H4                                                                          | 4504303          | 11         | 12              | 64                    | 70              |
| 153 | sperm protein associated with the nucleus on the X chromosome E                     | 22027496         | 11         | 2               | 77                    | 70              |
| 154 | peptidyl-prolyl cis-trans isomerase B precursor                                     | 4758950          | 24         | 14              | 58                    | 70              |
| 155 | alpha-centractin                                                                    | 5031569          | 43         | 13              | 56                    | 70              |
| 156 | mitochondrial inner membrane protein isoform 3                                      | 154354966        | 83         | 20              | 34                    | 69              |
| 157 | laminin subunit alpha-5 precursor                                                   | 21264602         | 400        | 30              | 11                    | 68              |
| 158 | peroxiredoxin-4 precursor                                                           | 5453549          | 31         | 12              | 56                    | 68              |
| 159 | adipocyte plasma membrane-associated protein                                        | 24308201         | 46         | 18              | 56                    | 68              |
| 160 | glutathione S-transferase P                                                         | 4504183          | 23         | 9               | 56                    | 68              |
| 161 | alpha-actinin-4                                                                     | 12025678         | 105        | 20              | 26                    | 68              |
| 162 | alcohol dehydrogenase [NADP+]                                                       | 24497577         | 37         | 11              | 32                    | 68              |
| 163 | peroxiredoxin-5, mitochondrial isoform a precursor                                  | 6912238          | 22         | 14              | 57                    | 68              |
| 164 | dynein light chain 2, cytoplasmic                                                   | 18087855         | 10         | 5               | 65                    | 67              |
| 165 | azurocidin preproprotein                                                            | 11342670         | 27         | 8               | 51                    | 67              |
| 166 | radial spoke head 1 homolog                                                         | 18254456         | 35         | 11              | 46                    | 67              |
| 167 | keratin, type II cytoskeletal 6B                                                    | 119703753        | 60         | 2               | 23                    | 67              |
| 168 | peroxiredoxin-2 isoform a                                                           | 32189392         | 22         | 12              | 55                    | 66              |
| 169 | carboxypeptidase Z isoform 2 precursor                                              | 62388875         | 73         | 17              | 33                    | 66              |
| 170 | dihydrolipoyl dehydrogenase, mitochondrial precursor                                | 91199540         | 54         | 20              | 55                    | 65              |
| 171 | dipeptidase 3 isoform a precursor                                                   | 193211608        | 56         | 14              | 34                    | 65              |
| 172 | valyl-tRNA synthetase                                                               | 5454158          | 140        | 18              | 18                    | 65              |
| 173 | keratin, type I cytoskeletal 13 isoform a                                           | 131412225        | 50         | 18              | 48                    | 64              |
| 174 | ubiquitin-40S ribosomal protein S27a precursor                                      | 208022622        | 18         | 4               | 30                    | 63              |
| 175 | protein NDRG1                                                                       | 37655183         | 43         | 11              | 34                    | 63              |
| 176 | 6-phosphofructokinase type C isoform 1                                              | 11321601         | 86         | 17              | 25                    | 63              |
| 177 | ferritin, mitochondrial precursor                                                   | 29126241         | 28         | 13              | 60                    | 62              |
| 178 | laminin subunit gamma-1 precursor                                                   | 145309326        | 178        | 21              | 16                    | 61              |

Contd...

Supplementary Table 5: Contd...

| No  | Protein                                                                                                             | Accession number | Mass (kDa) | Peptides number | Sequence coverage (%) | Spectral counts |
|-----|---------------------------------------------------------------------------------------------------------------------|------------------|------------|-----------------|-----------------------|-----------------|
| 179 | protein S100-A9                                                                                                     | 4506773          | 13         | 10              | 68                    | 61              |
| 180 | cytosol aminopeptidase                                                                                              | 41393561         | 56         | 20              | 56                    | 60              |
| 181 | dynein light chain 1, cytoplasmic                                                                                   | 4505813          | 10         | 8               | 65                    | 60              |
| 182 | acrosin precursor                                                                                                   | 148613878        | 46         | 14              | 39                    | 60              |
| 183 | carbonyl reductase [NADPH] 1                                                                                        | 4502599          | 30         | 13              | 51                    | 59              |
| 184 | myeloid leukemia factor 1 isoform 1                                                                                 | 11967975         | 31         | 11              | 56                    | 59              |
| 185 | trifunctional enzyme subunit alpha, mitochondrial precursor                                                         | 20127408         | 83         | 14              | 21                    | 58              |
| 186 | plasma serine protease inhibitor precursor                                                                          | 194018472        | 46         | 15              | 45                    | 58              |
| 187 | erlin-2 isoform 1                                                                                                   | 6005721          | 38         | 14              | 50                    | 58              |
| 188 | sperm surface protein Sp17                                                                                          | 8394343          | 17         | 6               | 64                    | 58              |
| 189 | 26S protease regulatory subunit 8 isoform 1                                                                         | 24497435         | 46         | 10              | 30                    | 57              |
| 190 | protein S100-A8                                                                                                     | 21614544         | 11         | 8               | 58                    | 57              |
| 191 | olfactomedin-4 precursor                                                                                            | 32313593         | 57         | 13              | 29                    | 56              |
| 192 | tektin-4                                                                                                            | 21389613         | 51         | 11              | 30                    | 56              |
| 193 | glucosamine--fructose-6-phosphate aminotransferase [isomerizing] 1 isoform 1                                        | 347659028        | 79         | 13              | 17                    | 55              |
| 194 | annexin A4                                                                                                          | 4502105          | 36         | 15              | 50                    | 55              |
| 195 | cytochrome b-c1 complex subunit 1, mitochondrial precursor                                                          | 46593007         | 53         | 12              | 31                    | 55              |
| 196 | voltage-dependent anion-selective channel protein 2 isoform 2                                                       | 296317339        | 32         | 11              | 47                    | 55              |
| 197 | elongation factor 1-delta isoform 1                                                                                 | 304555581        | 71         | 7               | 16                    | 55              |
| 198 | cAMP-dependent protein kinase type I-alpha regulatory subunit                                                       | 4506063          | 43         | 12              | 36                    | 54              |
| 199 | flavin reductase (NADPH)                                                                                            | 4502419          | 22         | 5               | 35                    | 53              |
| 200 | protein phosphatase 1 regulatory subunit 7                                                                          | 4506013          | 42         | 9               | 32                    | 53              |
| 201 | adenylate kinase isoenzyme 1                                                                                        | 4502011          | 22         | 7               | 35                    | 53              |
| 202 | L-xylulose reductase isoform 1                                                                                      | 7705925          | 26         | 8               | 41                    | 52              |
| 203 | 26S proteasome non-ATPase regulatory subunit 11                                                                     | 28872725         | 47         | 9               | 21                    | 52              |
| 204 | protein disulfide-isomerase A6 precursor                                                                            | 5031973          | 48         | 12              | 32                    | 52              |
| 205 | protein FAM166A                                                                                                     | 48717426         | 36         | 9               | 34                    | 52              |
| 206 | single-stranded DNA-binding protein, mitochondrial precursor                                                        | 4507231          | 17         | 12              | 65                    | 51              |
| 207 | dihydropyridyllysine-residue acetyltransferase component of pyruvate dehydrogenase complex, mitochondrial precursor | 31711992         | 69         | 14              | 27                    | 50              |
| 208 | carbonic anhydrase 4 precursor                                                                                      | 4502519          | 35         | 13              | 44                    | 50              |
| 209 | ras-related protein Rab-11B                                                                                         | 190358517        | 24         | 11              | 54                    | 50              |
| 210 | hsc70-interacting protein                                                                                           | 19923193         | 41         | 7               | 22                    | 50              |
| 211 | collagen alpha-1(XVIII) chain isoform 1 precursor                                                                   | 110611235        | 154        | 13              | 14                    | 50              |
| 212 | myosin-14 isoform 3                                                                                                 | 224831241        | 232        | 14              | 11                    | 50              |
| 213 | cytochrome c oxidase subunit II                                                                                     | 251831110        | 26         | 8               | 48                    | 49              |
| 214 | ATP synthase subunit O, mitochondrial precursor                                                                     | 4502303          | 23         | 9               | 54                    | 49              |
| 215 | vesicular integral-membrane protein VIP36 precursor                                                                 | 5803023          | 40         | 12              | 48                    | 48              |
| 216 | serum amyloid P-component precursor                                                                                 | 4502133          | 25         | 9               | 33                    | 48              |
| 217 | protein FAM71B                                                                                                      | 222418633        | 65         | 10              | 13                    | 48              |
| 218 | cAMP-dependent protein kinase type II-alpha regulatory subunit                                                      | 4758958          | 46         | 15              | 45                    | 48              |
| 219 | radial spoke head protein 9 homolog isoform 1                                                                       | 32964825         | 31         | 16              | 71                    | 48              |
| 220 | serpin B6                                                                                                           | 41152086         | 43         | 13              | 49                    | 47              |
| 221 | L-lactate dehydrogenase A chain isoform 3                                                                           | 260099723        | 40         | 9               | 28                    | 47              |
| 222 | transmembrane emp24 domain-containing protein 10 precursor                                                          | 98986464         | 25         | 8               | 40                    | 47              |
| 223 | dolichyl-diphosphooligosaccharide--protein glycosyltransferase subunit 2 isoform 2 precursor                        | 209413738        | 68         | 13              | 35                    | 47              |
| 224 | NADH dehydrogenase [ubiquinone] iron-sulfur protein 3, mitochondrial precursor                                      | 4758788          | 30         | 13              | 53                    | 47              |
| 225 | keratin, type I cytoskeletal 16                                                                                     | 24430192         | 51         | 6               | 25                    | 46              |
| 226 | SYNJ2BP-COX16 protein isoform 1                                                                                     | 321400118        | 21         | 6               | 31                    | 46              |
| 227 | cytoskeleton-associated protein 4                                                                                   | 19920317         | 66         | 16              | 37                    | 46              |
| 228 | sperm equatorial segment protein 1 precursor                                                                        | 21717832         | 39         | 5               | 16                    | 45              |
| 229 | cytochrome c oxidase subunit 5B, mitochondrial precursor                                                            | 17017988         | 14         | 14              | 67                    | 45              |

Contd...

Supplementary Table 5: Contd...

| No  | Protein                                                                             | Accession number | Mass (kDa) | Peptides number | Sequence coverage (%) | Spectral counts |
|-----|-------------------------------------------------------------------------------------|------------------|------------|-----------------|-----------------------|-----------------|
| 230 | plastin-3 isoform 1                                                                 | 209862851        | 71         | 7               | 19                    | 45              |
| 231 | hydroxyacyl-coenzyme A dehydrogenase, mitochondrial isoform 1 precursor             | 296179427        | 36         | 10              | 54                    | 45              |
| 232 | 26S protease regulatory subunit 6A                                                  | 21361144         | 49         | 12              | 27                    | 45              |
| 233 | 26S protease regulatory subunit 6B isoform 1                                        | 5729991          | 47         | 10              | 28                    | 45              |
| 234 | neprilysin                                                                          | 116256329        | 86         | 17              | 25                    | 44              |
| 235 | mitochondrial carrier homolog 2                                                     | 7657347          | 33         | 10              | 48                    | 44              |
| 236 | 60S acidic ribosomal protein P0                                                     | 16933546         | 34         | 8               | 39                    | 44              |
| 237 | neutrophil defensin 3 preproprotein                                                 | 4885179          | 10         | 4               | 20                    | 44              |
| 238 | alpha-actinin-1 isoform c                                                           | 194097352        | 103        | 8               | 17                    | 44              |
| 239 | ras GTPase-activating-like protein IQGAP1                                           | 4506787          | 189        | 16              | 11                    | 43              |
| 240 | lipid phosphate phosphohydrolase 1 isoform 1                                        | 29171736         | 32         | 5               | 28                    | 43              |
| 241 | ribose-phosphate pyrophosphokinase 2 isoform 2                                      | 4506129          | 35         | 10              | 44                    | 43              |
| 242 | 26S protease regulatory subunit 4                                                   | 24430151         | 49         | 9               | 20                    | 43              |
| 243 | citrate synthase, mitochondrial precursor                                           | 38327625         | 52         | 13              | 43                    | 42              |
| 244 | profilin-1                                                                          | 4826898          | 15         | 9               | 51                    | 42              |
| 245 | 26S proteasome non-ATPase regulatory subunit 13 isoform 1                           | 157502193        | 43         | 11              | 35                    | 42              |
| 246 | maltase-glucoamylase, intestinal                                                    | 221316699        | 210        | 18              | 14                    | 41              |
| 247 | carboxypeptidase E preproprotein                                                    | 4503009          | 53         | 10              | 17                    | 41              |
| 248 | aldose reductase                                                                    | 4502049          | 36         | 13              | 52                    | 41              |
| 249 | protein dpy-19 homolog 2                                                            | 93277105         | 87         | 12              | 16                    | 41              |
| 250 | nucleoside diphosphate kinase homolog 5                                             | 4505413          | 24         | 8               | 58                    | 41              |
| 251 | endoplasmic reticulum resident protein 29 isoform 1 precursor                       | 5803013          | 29         | 14              | 62                    | 41              |
| 252 | glycogen phosphorylase, brain form                                                  | 21361370         | 97         | 12              | 13                    | 40              |
| 253 | 2,4-dienoyl-CoA reductase, mitochondrial precursor                                  | 4503301          | 36         | 11              | 50                    | 39              |
| 254 | fructose-bisphosphate aldolase C                                                    | 4885063          | 39         | 2               | 17                    | 39              |
| 255 | 14-3-3 protein beta/alpha                                                           | 21328448         | 28         | 5               | 39                    | 39              |
| 256 | keratin, type II cytoskeletal 4                                                     | 331999954        | 56         | 13              | 30                    | 39              |
| 257 | outer dense fiber protein 3                                                         | 19526475         | 28         | 9               | 32                    | 39              |
| 258 | acrosomal protein SP-10 isoform a precursor                                         | 4501879          | 28         | 5               | 21                    | 38              |
| 259 | beta-2-microglobulin precursor                                                      | 4757826          | 14         | 3               | 19                    | 38              |
| 260 | epididymal secretory protein E3-beta precursor                                      | 11641279         | 18         | 7               | 50                    | 38              |
| 261 | chloride intracellular channel protein 1                                            | 14251209         | 27         | 8               | 46                    | 37              |
| 262 | cullin-associated NEDD8-dissociated protein 1                                       | 21361794         | 136        | 14              | 15                    | 37              |
| 263 | glycerol kinase 2                                                                   | 41393575         | 61         | 9               | 21                    | 37              |
| 264 | glypican-1 precursor                                                                | 167001141        | 62         | 13              | 28                    | 37              |
| 265 | adenine phosphoribosyltransferase isoform a                                         | 4502171          | 20         | 9               | 47                    | 37              |
| 266 | dolichyl-diphosphooligosaccharide--protein glycosyltransferase 48 subunit precursor | 20070197         | 51         | 10              | 37                    | 37              |
| 267 | tubulin beta-6 chain                                                                | 14210536         | 50         | 2               | 15                    | 37              |
| 268 | histone H2B type 1-M                                                                | 4504263          | 14         | 3               | 44                    | 37              |
| 269 | parkin coregulated gene protein isoform 2                                           | 122939202        | 29         | 10              | 46                    | 37              |
| 270 | lactoylglutathione lyase                                                            | 118402586        | 21         | 9               | 33                    | 36              |
| 271 | voltage-dependent anion-selective channel protein 3 isoform 1                       | 25188179         | 31         | 10              | 42                    | 36              |
| 272 | cytochrome c1, heme protein, mitochondrial                                          | 21359867         | 35         | 9               | 40                    | 36              |
| 273 | myosin regulatory light chain 12B                                                   | 15809016         | 20         | 8               | 68                    | 36              |
| 274 | ATP synthase subunit b, mitochondrial precursor                                     | 21361565         | 29         | 8               | 33                    | 36              |
| 275 | nuclear pore complex protein Nup155 isoform 1                                       | 24430149         | 155        | 14              | 12                    | 35              |
| 276 | 26S proteasome non-ATPase regulatory subunit 7                                      | 25777615         | 37         | 8               | 34                    | 35              |
| 277 | isocitrate dehydrogenase [NAD] subunit alpha, mitochondrial precursor               | 5031777          | 40         | 8               | 29                    | 35              |
| 278 | thioredoxin-related transmembrane protein 4 precursor                               | 40254947         | 39         | 4               | 12                    | 34              |
| 279 | membrane-associated progesterone receptor component 1                               | 5729875          | 22         | 10              | 37                    | 34              |
| 280 | glutathione reductase, mitochondrial isoform 1 precursor                            | 50301238         | 56         | 12              | 38                    | 33              |
| 281 | proteasome subunit alpha type-5 isoform 1                                           | 23110942         | 26         | 8               | 44                    | 33              |
| 282 | electron transfer flavoprotein subunit alpha, mitochondrial isoform a               | 4503607          | 35         | 11              | 51                    | 33              |
| 283 | succinyl-CoA: 3-ketoacid-coenzyme A transferase 1, mitochondrial precursor          | 4557817          | 56         | 12              | 21                    | 33              |

Contd...

Supplementary Table 5: Contd...

| No  | Protein                                                                                                                              | Accession number | Mass (kDa) | Peptides number | Sequence coverage (%) | Spectral counts |
|-----|--------------------------------------------------------------------------------------------------------------------------------------|------------------|------------|-----------------|-----------------------|-----------------|
| 284 | hyaluronidase PH-20 isoform 2                                                                                                        | 291290981        | 58         | 8               | 19                    | 33              |
| 285 | barrier-to-autointegration factor                                                                                                    | 4502389          | 10         | 9               | 64                    | 33              |
| 286 | NADH-ubiquinone oxidoreductase 75 subunit, mitochondrial isoform 1                                                                   | 33519475         | 79         | 10              | 19                    | 33              |
| 287 | prohibitin                                                                                                                           | 4505773          | 30         | 10              | 44                    | 33              |
| 288 | keratin, type I cytoskeletal 19                                                                                                      | 24234699         | 44         | 4               | 29                    | 33              |
| 289 | CD177 antigen precursor                                                                                                              | 110735433        | 46         | 8               | 25                    | 32              |
| 290 | nucleobindin-2 precursor                                                                                                             | 4826870          | 50         | 13              | 38                    | 32              |
| 291 | peptidyl-prolyl cis-trans isomerase FKBP4                                                                                            | 4503729          | 52         | 11              | 25                    | 32              |
| 292 | ras-related protein Rab-1B                                                                                                           | 13569962         | 22         | 7               | 31                    | 32              |
| 293 | radial spoke head protein 3 homolog                                                                                                  | 31543559         | 64         | 8               | 20                    | 32              |
| 294 | von Willebrand factor A domain-containing protein 1 isoform 1 precursor                                                              | 40068485         | 47         | 9               | 37                    | 32              |
| 295 | protein DJ-1                                                                                                                         | 31543380         | 20         | 5               | 22                    | 31              |
| 296 | uncharacterized protein C2Oorf107 precursor                                                                                          | 71043642         | 19         | 11              | 50                    | 31              |
| 297 | sodium/potassium-transporting ATPase subunit beta-3                                                                                  | 4502281          | 32         | 9               | 27                    | 31              |
| 298 | neutrophil gelatinase-associated lipocalin precursor                                                                                 | 38455402         | 23         | 9               | 52                    | 31              |
| 299 | T-complex protein 1 subunit zeta-2 isoform 1                                                                                         | 58331173         | 58         | 8               | 30                    | 31              |
| 300 | FUN14 domain-containing protein 2                                                                                                    | 24371248         | 21         | 8               | 28                    | 31              |
| 301 | keratin, type I cytoskeletal 18                                                                                                      | 4557888          | 48         | 7               | 20                    | 31              |
| 302 | speriolin isoform 1                                                                                                                  | 197276668        | 62         | 5               | 14                    | 31              |
| 303 | uncharacterized protein C2orf57                                                                                                      | 284413778        | 42         | 4               | 12                    | 31              |
| 304 | calmodulin                                                                                                                           | 58218968         | 17         | 8               | 42                    | 30              |
| 305 | dihydropolyllysine-residue succinyltransferase component of 2- oxoglutarate dehydrogenase complex, mitochondrial isoform 1 precursor | 19923748         | 49         | 11              | 36                    | 30              |
| 306 | vesicle-fusing ATPase                                                                                                                | 156564401        | 83         | 14              | 19                    | 30              |
| 307 | sperm acrosome membrane-associated protein 3                                                                                         | 27777653         | 23         | 6               | 33                    | 30              |
| 308 | translationally-controlled tumor protein                                                                                             | 4507669          | 20         | 5               | 26                    | 30              |
| 309 | eukaryotic translation initiation factor 5A-1 isoform B                                                                              | 219555712        | 17         | 8               | 36                    | 30              |
| 310 | L-lactate dehydrogenase A-like 6B                                                                                                    | 15082234         | 42         | 6               | 22                    | 30              |
| 311 | ADP-ribosylation factor 1                                                                                                            | 4502201          | 21         | 8               | 51                    | 30              |
| 312 | uncharacterized protein C2Oorf106 precursor                                                                                          | 71043622         | 20         | 4               | 41                    | 30              |
| 313 | DPY30 domain-containing protein 1                                                                                                    | 20270377         | 21         | 8               | 50                    | 30              |
| 314 | kallikrein-2 isoform 1 precursor                                                                                                     | 5031829          | 29         | 5               | 30                    | 30              |
| 315 | spondin-2 precursor                                                                                                                  | 6912682          | 36         | 5               | 10                    | 30              |
| 316 | glucose-6-phosphate isomerase isoform 2                                                                                              | 18201905         | 63         | 11              | 30                    | 29              |
| 317 | proteasome subunit alpha type-3 isoform 2                                                                                            | 23110939         | 28         | 7               | 28                    | 29              |
| 318 | ADP/ATP translocase 4                                                                                                                | 13775208         | 35         | 11              | 37                    | 29              |
| 319 | ATP-citrate synthase isoform 1                                                                                                       | 38569421         | 121        | 10              | 7.10                  | 29              |
| 320 | glycerol-3-phosphate dehydrogenase 1-like protein                                                                                    | 24307999         | 38         | 11              | 30                    | 29              |
| 321 | histone H3.1                                                                                                                         | 4504281          | 15         | 4               | 40                    | 29              |
| 322 | mitochondria-eating protein                                                                                                          | 21687119         | 61         | 6               | 10                    | 29              |
| 323 | succinate dehydrogenase [ubiquinone] iron-sulfur subunit, mitochondrial precursor                                                    | 115387094        | 32         | 9               | 37                    | 29              |
| 324 | tektin-1                                                                                                                             | 16753231         | 48         | 9               | 32                    | 29              |
| 325 | transmembrane protease serine 2 isoform 2                                                                                            | 205360943        | 54         | 8               | 15                    | 28              |
| 326 | protein S100-A11                                                                                                                     | 5032057          | 12         | 7               | 63                    | 28              |
| 327 | heat shock 70 protein 4L                                                                                                             | 31541941         | 95         | 12              | 10                    | 28              |
| 328 | transmembrane emp24 domain-containing protein 9 precursor                                                                            | 39725636         | 27         | 6               | 25                    | 28              |
| 329 | epididymal secretory protein E3-alpha precursor                                                                                      | 11386189         | 18         | 6               | 35                    | 28              |
| 330 | ras-related protein Rab-14                                                                                                           | 19923483         | 24         | 7               | 45                    | 28              |
| 331 | regenerating islet-derived protein 3-gamma precursor                                                                                 | 38348213         | 19         | 4               | 34                    | 28              |
| 332 | proteasome subunit beta type-5 isoform 1                                                                                             | 4506201          | 28         | 8               | 30                    | 27              |
| 333 | histone H2A type 1-A                                                                                                                 | 25092737         | 14         | 6               | 35                    | 27              |
| 334 | integrin alpha-M isoform 1 precursor                                                                                                 | 224831239        | 127        | 12              | 12                    | 27              |
| 335 | ATP synthase subunit d, mitochondrial isoform a                                                                                      | 5453559          | 18         | 10              | 57                    | 27              |
| 336 | annexin A11                                                                                                                          | 22165431         | 54         | 12              | 22                    | 27              |
| 337 | synaptic vesicle membrane protein VAT-1 homolog                                                                                      | 18379349         | 42         | 9               | 24                    | 27              |

Contd...

Supplementary Table 5: Contd...

| No  | Protein                                                                            | Accession number | Mass (kDa) | Peptides number | Sequence coverage (%) | Spectral counts |
|-----|------------------------------------------------------------------------------------|------------------|------------|-----------------|-----------------------|-----------------|
| 338 | T-complex protein 11 homolog isoform 1                                             | 148226214        | 57         | 7               | 25                    | 27              |
| 339 | testis-expressed protein 101 isoform 1                                             | 194018544        | 29         | 5               | 18                    | 26              |
| 340 | carnitine O-palmitoyltransferase 2, mitochondrial precursor                        | 4503023          | 74         | 9               | 21                    | 26              |
| 341 | integrin beta-2 precursor                                                          | 89191865         | 85         | 10              | 13                    | 26              |
| 342 | tripeptidyl-peptidase 2                                                            | 186972143        | 138        | 11              | 11                    | 26              |
| 343 | transmembrane protein 190 precursor                                                | 21040263         | 19         | 6               | 39                    | 26              |
| 344 | protein disulfide-isomerase A4 precursor                                           | 4758304          | 73         | 12              | 20                    | 26              |
| 345 | cytochrome b-c1 complex subunit 7 isoform 1                                        | 5454152          | 14         | 7               | 59                    | 26              |
| 346 | cathepsin G preproprotein                                                          | 4503149          | 29         | 8               | 33                    | 26              |
| 347 | proteasome subunit alpha type-1 isoform 1                                          | 23110935         | 30         | 10              | 42                    | 25              |
| 348 | mucin-6 precursor                                                                  | 151301154        | 257        | 12              | 7.30                  | 25              |
| 349 | importin subunit beta-1                                                            | 19923142         | 97         | 12              | 13                    | 25              |
| 350 | transmembrane emp24 domain-containing protein 7 precursor                          | 32996709         | 25         | 7               | 33                    | 25              |
| 351 | protein-L-isoaspartate (D-aspartate) O-methyltransferase isoform 2                 | 354983493        | 30         | 8               | 48                    | 25              |
| 352 | 3-hydroxyisobutyrate dehydrogenase, mitochondrial precursor                        | 23308751         | 35         | 9               | 33                    | 25              |
| 353 | eukaryotic initiation factor 4A-I isoform 1                                        | 4503529          | 46         | 4               | 14                    | 25              |
| 354 | uncharacterized protein C9orf9                                                     | 33285006         | 19         | 7               | 64                    | 25              |
| 355 | rab GDP dissociation inhibitor beta isoform 1                                      | 6598323          | 51         | 10              | 26                    | 25              |
| 356 | histone H2A type 2-A                                                               | 106775678        | 14         | 3               | 58                    | 25              |
| 357 | G-protein coupled receptor 64 isoform 2 precursor                                  | 119943116        | 110        | 7               | 9.40                  | 24              |
| 358 | ribonuclease inhibitor                                                             | 42822872         | 50         | 7               | 15                    | 24              |
| 359 | 26S protease regulatory subunit 10B                                                | 195539395        | 46         | 7               | 17                    | 24              |
| 360 | interferon-inducible GTPase 5                                                      | 10257429         | 50         | 10              | 34                    | 24              |
| 361 | axonemal dynein light intermediate polypeptide 1                                   | 37595560         | 32         | 8               | 36                    | 24              |
| 362 | matrix metalloproteinase-9 preproprotein                                           | 74272287         | 78         | 10              | 19                    | 24              |
| 363 | nitric oxide synthase, endothelial isoform 1                                       | 40254422         | 133        | 9               | 10                    | 24              |
| 364 | enkurin                                                                            | 21450721         | 29         | 7               | 38                    | 24              |
| 365 | signal peptidase complex subunit 2                                                 | 162417971        | 25         | 10              | 40                    | 24              |
| 366 | 14-3-3 protein gamma                                                               | 21464101         | 28         | 4               | 38                    | 24              |
| 367 | beta-centractin                                                                    | 11342680         | 42         | 3               | 37                    | 24              |
| 368 | very long-chain specific acyl-CoA dehydrogenase, mitochondrial isoform 2 precursor | 76496475         | 68         | 11              | 22                    | 23              |
| 369 | proteasome subunit alpha type-6                                                    | 23110944         | 27         | 9               | 43                    | 23              |
| 370 | brain acid soluble protein 1                                                       | 30795231         | 23         | 7               | 46                    | 23              |
| 371 | acid ceramidase isoform b                                                          | 189011546        | 47         | 8               | 16                    | 23              |
| 372 | poly (rC)-binding protein 1                                                        | 222352151        | 37         | 6               | 19                    | 23              |
| 373 | sodium/potassium-transporting ATPase subunit alpha-4 isoform 1                     | 153946397        | 114        | 9               | 11                    | 23              |
| 374 | 6-phosphogluconate dehydrogenase, decarboxylating                                  | 40068518         | 53         | 9               | 17                    | 23              |
| 375 | ubiquitin carboxyl-terminal hydrolase 14 isoform b                                 | 82880645         | 52         | 8               | 14                    | 23              |
| 376 | glypican-4 precursor                                                               | 21614525         | 62         | 6               | 16                    | 23              |
| 377 | gamma-glutamyltranspeptidase 1 precursor                                           | 73915090         | 61         | 8               | 13                    | 23              |
| 378 | histone H2A.V isoform 1                                                            | 6912616          | 14         | 4               | 31                    | 23              |
| 379 | gelsolin isoform a precursor                                                       | 4504165          | 86         | 8               | 12                    | 23              |
| 380 | uncharacterized protein C9orf24 isoform 1                                          | 21362074         | 30         | 6               | 24                    | 23              |
| 381 | cytochrome b-c1 complex subunit Rieske, mitochondrial                              | 163644321        | 30         | 5               | 26                    | 23              |
| 382 | nucleoporin p54                                                                    | 26051237         | 55         | 9               | 23                    | 23              |
| 383 | 26S proteasome non-ATPase regulatory subunit 8                                     | 156631005        | 40         | 7               | 26                    | 23              |
| 384 | lysozyme C precursor                                                               | 4557894          | 17         | 6               | 45                    | 23              |
| 385 | adenosylhomocysteinase isoform 1                                                   | 9951915          | 48         | 6               | 12                    | 22              |
| 386 | phosphatidylethanolamine-binding protein 1 preproprotein                           | 4505621          | 21         | 5               | 48                    | 22              |
| 387 | CDGSH iron-sulfur domain-containing protein 1                                      | 8923930          | 12         | 6               | 53                    | 22              |
| 388 | casein kinase II subunit alpha isoform a                                           | 29570791         | 45         | 7               | 31                    | 22              |
| 389 | malectin precursor                                                                 | 7661948          | 32         | 8               | 40                    | 22              |
| 390 | transmembrane and coiled-coil domain-containing protein 2                          | 56847610         | 20         | 5               | 33                    | 22              |
| 391 | ES1 protein homolog, mitochondrial isoform la precursor                            | 296531406        | 28         | 7               | 41                    | 22              |
| 392 | erythrocyte band 7 integral membrane protein isoform a                             | 38016911         | 32         | 7               | 29                    | 22              |
| 393 | sperm acrosome membrane-associated protein 4 precursor                             | 19424138         | 13         | 3               | 35                    | 22              |

Contd..



Supplementary Table 5: Contd...

| No  | Protein                                                                                           | Accession number | Mass (kDa) | Peptides number | Sequence coverage (%) | Spectral counts |
|-----|---------------------------------------------------------------------------------------------------|------------------|------------|-----------------|-----------------------|-----------------|
| 394 | membrane-associated progesterone receptor component 2                                             | 291621647        | 26         | 5               | 24                    | 22              |
| 395 | NADH dehydrogenase [ubiquinone] 1 beta subcomplex subunit 10                                      | 4758774          | 21         | 6               | 35                    | 22              |
| 396 | cytochrome b5 isoform 1                                                                           | 41281768         | 15         | 4               | 43                    | 22              |
| 397 | importin-5                                                                                        | 24797086         | 126        | 7               | 7.00                  | 21              |
| 398 | electron transfer flavoprotein subunit beta isoform 1                                             | 4503609          | 28         | 8               | 34                    | 21              |
| 399 | vesicle-associated membrane protein-associated protein A isoform 2                                | 94721252         | 28         | 5               | 23                    | 21              |
| 400 | 60S acidic ribosomal protein P2                                                                   | 4506671          | 12         | 7               | 76                    | 21              |
| 401 | transforming protein RhoA precursor                                                               | 10835049         | 22         | 7               | 37                    | 21              |
| 402 | importin subunit alpha-2                                                                          | 4504897          | 58         | 8               | 25                    | 21              |
| 403 | ras-related protein Rab-3B                                                                        | 19923750         | 25         | 3               | 16                    | 21              |
| 404 | sperm-associated antigen 6 isoform 1                                                              | 6912678          | 55         | 7               | 26                    | 21              |
| 405 | endoplasmic reticulum resident protein 44 precursor                                               | 52487191         | 47         | 5               | 21                    | 21              |
| 406 | annexin A7 isoform 1                                                                              | 4502111          | 50         | 6               | 13                    | 21              |
| 407 | ADP-ribosylation factor 4                                                                         | 4502205          | 21         | 4               | 48                    | 21              |
| 408 | transcription factor A, mitochondrial precursor                                                   | 4507401          | 29         | 7               | 33                    | 21              |
| 409 | calpain small subunit 1                                                                           | 51599151         | 28         | 7               | 39                    | 21              |
| 410 | glycodelin precursor                                                                              | 65507501         | 21         | 4               | 28                    | 21              |
| 411 | annexin A13 isoform a                                                                             | 51895795         | 35         | 8               | 34                    | 21              |
| 412 | NADPH--cytochrome P450 reductase                                                                  | 127139033        | 77         | 6               | 15                    | 21              |
| 413 | proteasome subunit alpha type-2                                                                   | 4506181          | 26         | 7               | 47                    | 20              |
| 414 | WD repeat-containing protein 16 isoform b                                                         | 124028512        | 68         | 9               | 16                    | 20              |
| 415 | beta-lactamase-like protein 2                                                                     | 7705793          | 33         | 8               | 35                    | 20              |
| 416 | prenylcysteine oxidase 1 precursor                                                                | 166795301        | 57         | 8               | 21                    | 20              |
| 417 | gamma-glutamyl hydrolase precursor                                                                | 4503987          | 36         | 7               | 31                    | 20              |
| 418 | nuclear pore complex protein Nup93 isoform 1                                                      | 208609990        | 93         | 10              | 18                    | 20              |
| 419 | dynein heavy chain 8, axonemal                                                                    | 332688227        | 539        | 11              | 2.60                  | 20              |
| 420 | extracellular matrix protein 1 isoform 3 precursor                                                | 322302700        | 64         | 6               | 14                    | 20              |
| 421 | heme-binding protein 2                                                                            | 7657603          | 23         | 4               | 20                    | 20              |
| 422 | lysozyme-like protein 4 precursor                                                                 | 21389465         | 16         | 4               | 32                    | 20              |
| 423 | 26S proteasome non-ATPase regulatory subunit 2                                                    | 25777602         | 100        | 10              | 11                    | 20              |
| 424 | 26S proteasome non-ATPase regulatory subunit 3                                                    | 25777612         | 61         | 8               | 19                    | 20              |
| 425 | enoyl-CoA hydratase, mitochondrial                                                                | 194097323        | 31         | 7               | 31                    | 20              |
| 426 | heme oxygenase 2                                                                                  | 8051608          | 36         | 8               | 41                    | 20              |
| 427 | voltage-dependent anion-selective channel protein 1                                               | 4507879          | 31         | 5               | 19                    | 20              |
| 428 | coiled-coil domain-containing protein 19, mitochondrial precursor                                 | 81295816         | 66         | 6               | 10                    | 20              |
| 429 | histidine triad nucleotide-binding protein 1                                                      | 4885413          | 14         | 6               | 72                    | 20              |
| 430 | proteasome subunit alpha type-7-like isoform 2                                                    | 68303563         | 28         | 7               | 41                    | 19              |
| 431 | proteasome subunit beta type-6                                                                    | 23110925         | 25         | 5               | 34                    | 19              |
| 432 | prostasin preproprotein                                                                           | 4506153          | 36         | 5               | 22                    | 19              |
| 433 | ubiquitin thioesterase OTUB1                                                                      | 109148508        | 31         | 5               | 21                    | 19              |
| 434 | pyruvate dehydrogenase E1 component subunit alpha, testis- specific form, mitochondrial precursor | 4885543          | 43         | 6               | 16                    | 19              |
| 435 | 26S protease regulatory subunit 7 isoform 1                                                       | 4506209          | 49         | 9               | 18                    | 19              |
| 436 | rho GDP-dissociation inhibitor 1 isoform a                                                        | 4757768          | 23         | 4               | 23                    | 19              |
| 437 | calicin                                                                                           | 169636428        | 67         | 7               | 14                    | 19              |
| 438 | transmembrane protein 89 precursor                                                                | 56847630         | 18         | 4               | 28                    | 19              |
| 439 | 40S ribosomal protein S18                                                                         | 11968182         | 18         | 6               | 37                    | 19              |
| 440 | 26S proteasome non-ATPase regulatory subunit 14                                                   | 5031981          | 35         | 7               | 45                    | 19              |
| 441 | keratin, type II cytoskeletal 8                                                                   | 4504919          | 54         | 3               | 15                    | 19              |
| 442 | eukaryotic translation initiation factor 3 subunit F                                              | 4503519          | 38         | 6               | 16                    | 19              |
| 443 | UMP-CMP kinase isoform a                                                                          | 7706497          | 26         | 5               | 22                    | 19              |
| 444 | phosphoglycerate mutase 1                                                                         | 4505753          | 29         | 5               | 47                    | 19              |
| 445 | aspartate aminotransferase, mitochondrial precursor                                               | 73486658         | 48         | 7               | 20                    | 18              |
| 446 | lysosome-associated membrane glycoprotein 1 precursor                                             | 112380628        | 45         | 4               | 9.80                  | 18              |
| 447 | CD59 glycoprotein preproprotein                                                                   | 187828910        | 14         | 5               | 26                    | 18              |

Contd...

**Supplementary Table 5: Contd...**

| <i>No</i> | <i>Protein</i>                                                                  | <i>Accession number</i> | <i>Mass (kDa)</i> | <i>Peptides number</i> | <i>Sequence coverage (%)</i> | <i>Spectral counts</i> |
|-----------|---------------------------------------------------------------------------------|-------------------------|-------------------|------------------------|------------------------------|------------------------|
| 448       | ras-related protein Rab-27B                                                     | 5729997                 | 25                | 7                      | 25                           | 18                     |
| 449       | 10 heat shock protein, mitochondrial                                            | 4504523                 | 11                | 7                      | 52                           | 18                     |
| 450       | cytochrome c oxidase subunit 6B1                                                | 4502985                 | 10                | 7                      | 67                           | 18                     |
| 451       | proteasome activator complex subunit 1 isoform 1                                | 5453990                 | 29                | 8                      | 41                           | 18                     |
| 452       | transmembrane emp24 domain-containing protein 4 precursor                       | 33457308                | 26                | 6                      | 32                           | 18                     |
| 453       | dynein heavy chain 17, axonemal                                                 | 256542310               | 509               | 9                      | 2.40                         | 18                     |
| 454       | serine/threonine-protein phosphatase PP1-beta catalytic subunit isoform 1       | 4506005                 | 37                | 5                      | 15                           | 18                     |
| 455       | dnaJ homolog subfamily A member 2                                               | 5031741                 | 46                | 7                      | 27                           | 18                     |
| 456       | ATP synthase subunit gamma, mitochondrial isoform L (liver) precursor           | 50345988                | 33                | 6                      | 29                           | 18                     |
| 457       | myeloblastin precursor                                                          | 71361688                | 28                | 4                      | 14                           | 18                     |
| 458       | beta-actin-like protein 2                                                       | 63055057                | 42                | 2                      | 24                           | 18                     |
| 459       | reticulocalbin-2 precursor                                                      | 4506457                 | 37                | 8                      | 32                           | 18                     |
| 460       | glucosidase 2 subunit beta isoform 1 precursor                                  | 48255889                | 59                | 5                      | 9.70                         | 17                     |
| 461       | alpha-1-antitrypsin precursor                                                   | 50363217                | 47                | 7                      | 23                           | 17                     |
| 462       | proteasome subunit alpha type-7                                                 | 4506189                 | 28                | 3                      | 42                           | 17                     |
| 463       | stress-70 protein, mitochondrial precursor                                      | 24234688                | 74                | 8                      | 19                           | 17                     |
| 464       | copper homeostasis protein cutC homolog                                         | 148596990               | 29                | 5                      | 25                           | 17                     |
| 465       | hypoxanthine-guanine phosphoribosyltransferase                                  | 4504483                 | 25                | 6                      | 29                           | 17                     |
| 466       | nicastrin precursor                                                             | 24638433                | 78                | 6                      | 10                           | 17                     |
| 467       | tropomyosin alpha-3 chain isoform 2                                             | 24119203                | 29                | 5                      | 32                           | 17                     |
| 468       | prostate and testis expressed protein 1 precursor                               | 19923082                | 14                | 5                      | 40                           | 17                     |
| 469       | solute carrier family 2, facilitated glucose transporter member 14              | 23592238                | 56                | 5                      | 13                           | 17                     |
| 470       | ras-related C3 botulinum toxin substrate 1 isoform Rac1b                        | 9845509                 | 23                | 6                      | 21                           | 17                     |
| 471       | NME1-NME2 protein                                                               | 66392203                | 30                | 7                      | 25                           | 17                     |
| 472       | isochorismatase domain-containing protein 2, mitochondrial isoform 2            | 13376007                | 24                | 6                      | 60                           | 17                     |
| 473       | CD63 antigen isoform A                                                          | 4502679                 | 26                | 2                      | 5.00                         | 17                     |
| 474       | V-type proton ATPase catalytic subunit A                                        | 19913424                | 68                | 6                      | 15                           | 17                     |
| 475       | stomatin-like protein 2                                                         | 7305503                 | 39                | 7                      | 30                           | 17                     |
| 476       | ubiquitin carboxyl-terminal hydrolase isozyme L3                                | 5174741                 | 26                | 5                      | 27                           | 17                     |
| 477       | slit homolog 2 protein precursor                                                | 4759146                 | 170               | 10                     | 11                           | 17                     |
| 478       | dynactin subunit 1 isoform 1                                                    | 13259510                | 142               | 7                      | 5.20                         | 17                     |
| 479       | cytochrome c                                                                    | 11128019                | 12                | 7                      | 57                           | 17                     |
| 480       | glutamate carboxypeptidase 2 isoform 1                                          | 4758398                 | 84                | 7                      | 14                           | 16                     |
| 481       | medium-chain specific acyl-CoA dehydrogenase, mitochondrial isoform b precursor | 187960098               | 47                | 6                      | 21                           | 16                     |
| 482       | proteasome subunit beta type-1                                                  | 4506193                 | 26                | 6                      | 35                           | 16                     |
| 483       | proteasome subunit alpha type-4 isoform 1                                       | 4506185                 | 29                | 6                      | 31                           | 16                     |
| 484       | kunitz-type protease inhibitor 3 precursor                                      | 189571689               | 10                | 3                      | 29                           | 16                     |
| 485       | programmed cell death 6-interacting protein isoform 1                           | 22027538                | 96                | 5                      | 4.80                         | 16                     |
| 486       | translocon-associated protein subunit alpha precursor                           | 169404009               | 32                | 3                      | 12                           | 16                     |
| 487       | erlin-1                                                                         | 154800487               | 39                | 5                      | 28                           | 16                     |
| 488       | 26S proteasome non-ATPase regulatory subunit 12 isoform 1                       | 4506221                 | 53                | 8                      | 24                           | 16                     |
| 489       | nucleotide exchange factor SIL1 precursor                                       | 11968009                | 52                | 6                      | 15                           | 16                     |
| 490       | vesicle-associated membrane protein 3                                           | 4759300                 | 11                | 5                      | 41                           | 16                     |
| 491       | 40S ribosomal protein S15a                                                      | 71772415                | 15                | 6                      | 54                           | 16                     |
| 492       | epoxide hydrolase 2                                                             | 27597073                | 63                | 4                      | 7.40                         | 16                     |
| 493       | 40S ribosomal protein S16                                                       | 4506691                 | 16                | 6                      | 42                           | 16                     |
| 494       | protein FAM154A                                                                 | 301129242               | 55                | 5                      | 11                           | 16                     |
| 495       | GTP-binding nuclear protein Ran                                                 | 5453555                 | 24                | 5                      | 20                           | 16                     |
| 496       | normal mucosa of esophagus-specific gene 1 protein                              | 37694067                | 10                | 6                      | 61                           | 16                     |
| 497       | profilin-2 isoform a                                                            | 16753215                | 15                | 4                      | 44                           | 16                     |
| 498       | dynein light chain Tctex-type 1                                                 | 5730085                 | 12                | 4                      | 58                           | 16                     |
| 499       | abhydrolase domain-containing protein 14B                                       | 14249382                | 22                | 4                      | 22                           | 16                     |
| 500       | uromodulin precursor                                                            | 59850812                | 70                | 7                      | 13                           | 15                     |

*Contd...*

**Supplementary Table 5: Contd...**

| <i>No</i> | <i>Protein</i>                                                                           | <i>Accession number</i> | <i>Mass (kDa)</i> | <i>Peptides number</i> | <i>Sequence coverage (%)</i> | <i>Spectral counts</i> |
|-----------|------------------------------------------------------------------------------------------|-------------------------|-------------------|------------------------|------------------------------|------------------------|
| 501       | tomoregulin-2 precursor                                                                  | 12383051                | 41                | 5                      | 13                           | 15                     |
| 502       | ras-related protein Rab-7a                                                               | 34147513                | 23                | 4                      | 23                           | 15                     |
| 503       | alanyl-tRNA editing protein Aarsd1 isoform 1                                             | 217416402               | 66                | 4                      | 7.70                         | 15                     |
| 504       | sodium/potassium-transporting ATPase subunit alpha-2 proprotein                          | 4502271                 | 112               | 2                      | 8.40                         | 15                     |
| 505       | translin                                                                                 | 4759270                 | 26                | 7                      | 38                           | 15                     |
| 507       | coiled-coil-helix-coiled-coil-helix domain-containing protein 3, mitochondrial precursor | 8923390                 | 26                | 5                      | 17                           | 15                     |
| 508       | 40S ribosomal protein S2                                                                 | 15055539                | 31                | 6                      | 21                           | 15                     |
| 509       | pyruvate dehydrogenase protein X component, mitochondrial isoform 2                      | 203098816               | 51                | 6                      | 13                           | 15                     |
| 510       | retinol dehydrogenase 11 isoform 1 precursor                                             | 166795268               | 35                | 5                      | 21                           | 15                     |
| 511       | myotrophin                                                                               | 21956645                | 13                | 5                      | 72                           | 15                     |
| 512       | NADH dehydrogenase [ubiquinone] 1 alpha subcomplex subunit 5                             | 4826848                 | 13                | 4                      | 40                           | 15                     |
| 513       | arachidonate 15-lipoxygenase B isoform d                                                 | 85067501                | 76                | 6                      | 8.70                         | 15                     |
| 514       | tektin-5                                                                                 | 21389569                | 56                | 7                      | 18                           | 14                     |
| 515       | proteasome subunit beta type-4                                                           | 22538467                | 29                | 5                      | 28                           | 14                     |
| 516       | enoyl-CoA delta isomerase 1, mitochondrial isoform 2 precursor                           | 295842266               | 31                | 4                      | 16                           | 14                     |
| 517       | NADH-cytochrome b5 reductase 2                                                           | 47778923                | 31                | 6                      | 31                           | 14                     |
| 518       | endoplasmic reticulum-Golgi intermediate compartment protein 3 isoform a                 | 38327615                | 44                | 7                      | 23                           | 14                     |
| 519       | hornerin                                                                                 | 57864582                | 282               | 5                      | 3.90                         | 14                     |
| 520       | ras-related protein Rab-5C isoform a                                                     | 41393614                | 23                | 6                      | 28                           | 14                     |
| 521       | 40S ribosomal protein S3                                                                 | 15718687                | 27                | 5                      | 21                           | 14                     |
| 522       | histone H2A-Bbd type 2/3                                                                 | 63029935                | 13                | 4                      | 54                           | 14                     |
| 523       | myosin-VI                                                                                | 92859701                | 149               | 8                      | 6.80                         | 14                     |
| 524       | phosphoglycerate mutase 2                                                                | 50593010                | 29                | 4                      | 20                           | 14                     |
| 525       | uncharacterized protein C7orf61                                                          | 51972226                | 24                | 3                      | 18                           | 14                     |
| 526       | NADH dehydrogenase [ubiquinone] 1 alpha subcomplex subunit 8                             | 7657369                 | 20                | 3                      | 23                           | 14                     |
| 527       | 40S ribosomal protein S3a                                                                | 4506723                 | 30                | 5                      | 23                           | 14                     |
| 528       | lysyl-tRNA synthetase isoform 1                                                          | 194272210               | 71                | 7                      | 15                           | 14                     |
| 529       | dnaJ homolog subfamily B member 8                                                        | 23503241                | 26                | 4                      | 27                           | 14                     |
| 530       | isocitrate dehydrogenase [NAD] subunit beta, mitochondrial isoform a precursor           | 28178821                | 42                | 6                      | 25                           | 14                     |
| 531       | coiled-coil domain-containing protein 63                                                 | 22749217                | 66                | 7                      | 17                           | 14                     |
| 532       | 45 calcium-binding protein isoform 2 precursor                                           | 18699732                | 42                | 4                      | 12                           | 14                     |
| 533       | spermatogenesis-associated protein 19, mitochondrial precursor                           | 28376652                | 19                | 3                      | 24                           | 14                     |
| 534       | endoplasmic reticulum-Golgi intermediate compartment protein 1                           | 72534712                | 33                | 5                      | 23                           | 14                     |
| 535       | 72 type IV collagenase isoform a preproprotein                                           | 11342666                | 74                | 3                      | 6.80                         | 14                     |
| 536       | ATP synthase subunit e, mitochondrial                                                    | 6005717                 | 8                 | 3                      | 51                           | 14                     |
| 537       | 15 selenoprotein isoform 1 precursor                                                     | 42741648                | 18                | 5                      | 27                           | 14                     |
| 538       | 60S ribosomal protein L23                                                                | 4506605                 | 15                | 5                      | 39                           | 14                     |
| 539       | superoxide dismutase [Mn], mitochondrial isoform A precursor                             | 67782305                | 25                | 5                      | 27                           | 13                     |
| 540       | aspartyl aminopeptidase                                                                  | 156416028               | 53                | 5                      | 17                           | 13                     |
| 541       | ferritin heavy chain                                                                     | 56682959                | 21                | 5                      | 37                           | 13                     |
| 542       | leukocyte surface antigen CD47 isoform 1 precursor                                       | 4502673                 | 35                | 2                      | 5.90                         | 13                     |
| 543       | receptor expression-enhancing protein 6                                                  | 19923919                | 21                | 4                      | 22                           | 13                     |
| 544       | protein ERGIC-53 precursor                                                               | 5031873                 | 58                | 5                      | 13                           | 13                     |
| 545       | dnaJ homolog subfamily B member 11 precursor                                             | 7706495                 | 41                | 6                      | 17                           | 13                     |
| 546       | lactadherin isoform a preproprotein                                                      | 167830475               | 43                | 6                      | 20                           | 13                     |
| 547       | fatty acid-binding protein, epidermal                                                    | 4557581                 | 15                | 5                      | 57                           | 13                     |
| 548       | destrin isoform a                                                                        | 5802966                 | 19                | 3                      | 24                           | 13                     |
| 549       | bifunctional aminoacyl-tRNA synthetase                                                   | 62241042                | 171               | 8                      | 3.60                         | 13                     |
| 550       | dynactin subunit 2                                                                       | 5453629                 | 45                | 7                      | 25                           | 13                     |
| 551       | cAMP-dependent protein kinase catalytic subunit alpha isoform 2                          | 46909584                | 40                | 3                      | 8.70                         | 13                     |
| 552       | casein kinase II subunit beta                                                            | 23503295                | 25                | 6                      | 45                           | 13                     |
| 553       | semaphorin-3C precursor                                                                  | 5454048                 | 85                | 3                      | 6.10                         | 13                     |
| 554       | izumo sperm-egg fusion protein 2 precursor                                               | 63999117                | 25                | 4                      | 14                           | 13                     |
| 555       | large proline-rich protein BAG6 isoform a                                                | 149158692               | 119               | 7                      | 5.20                         | 13                     |
| 556       | coiled-coil domain-containing protein 147                                                | 56961680                | 103               | 6                      | 8.10                         | 13                     |

*Contd...*

Supplementary Table 5: Contd...

| No  | Protein                                                                            | Accession number | Mass (kDa) | Peptides number | Sequence coverage (%) | Spectral counts |
|-----|------------------------------------------------------------------------------------|------------------|------------|-----------------|-----------------------|-----------------|
| 557 | programmed cell death protein 6                                                    | 7019485          | 22         | 5               | 31                    | 13              |
| 558 | ran-specific GTPase-activating protein                                             | 4506407          | 23         | 3               | 15                    | 13              |
| 559 | 40S ribosomal protein S4, X isoform X isoform                                      | 4506725          | 30         | 5               | 18                    | 13              |
| 560 | uncharacterized protein C1orf194                                                   | 171916088        | 18         | 4               | 32                    | 13              |
| 561 | RPS10-NUDT3 protein                                                                | 321117084        | 33         | 4               | 21                    | 13              |
| 562 | proteasome subunit beta type-7 proprotein                                          | 4506203          | 30         | 5               | 24                    | 12              |
| 563 | protein NipSnap homolog 3A                                                         | 22267436         | 28         | 4               | 23                    | 12              |
| 564 | hydroxyacylglutathione hydrolase, mitochondrial isoform 1 precursor                | 94538322         | 34         | 6               | 28                    | 12              |
| 565 | homogentisate 1,2-dioxygenase                                                      | 115527117        | 50         | 6               | 21                    | 12              |
| 566 | F-actin-capping protein subunit beta isoform 1                                     | 4826659          | 31         | 4               | 21                    | 12              |
| 567 | delta (3,5)-Delta (2,4)-dienoyl-CoA isomerase, mitochondrial precursor             | 70995211         | 36         | 6               | 25                    | 12              |
| 568 | thioredoxin isoform 1                                                              | 50592994         | 12         | 4               | 43                    | 12              |
| 569 | EF-hand domain-containing family member C2                                         | 31542743         | 87         | 4               | 4.30                  | 12              |
| 570 | ATP synthase subunit g, mitochondrial                                              | 51479156         | 11         | 5               | 53                    | 12              |
| 571 | EF-hand calcium-binding domain-containing protein 6 isoform a                      | 38570107         | 173        | 5               | 3.40                  | 12              |
| 572 | cadherin-1 preproprotein                                                           | 4757960          | 97         | 3               | 4.80                  | 12              |
| 573 | short-chain specific acyl-CoA dehydrogenase, mitochondrial precursor               | 4557233          | 44         | 6               | 23                    | 12              |
| 574 | NADH dehydrogenase [ubiquinone] flavoprotein 2, mitochondrial precursor            | 222080062        | 27         | 4               | 22                    | 12              |
| 575 | dehydrogenase/reductase SDR family member 7 precursor                              | 7706318          | 38         | 6               | 23                    | 12              |
| 576 | tetratricopeptide repeat protein 25                                                | 13899233         | 77         | 6               | 7.30                  | 12              |
| 577 | ropporin-1-like protein                                                            | 17572807         | 26         | 5               | 28                    | 12              |
| 578 | acrosome formation-associated factor isoform 1                                     | 239582757        | 33         | 4               | 20                    | 12              |
| 579 | UPF0468 protein C16orf80                                                           | 8392875          | 23         | 3               | 19                    | 12              |
| 580 | transcription elongation factor B polypeptide 2 isoform b                          | 46276893         | 18         | 4               | 28                    | 12              |
| 581 | transcription elongation factor B polypeptide 1 isoform a                          | 325652033        | 12         | 6               | 59                    | 12              |
| 582 | retinoid-inducible serine carboxypeptidase precursor                               | 11055992         | 51         | 4               | 6.90                  | 12              |
| 583 | 3-mercaptopyruvate sulfurtransferase isoform 2                                     | 61835204         | 33         | 4               | 23                    | 12              |
| 584 | platelet-activating factor acetylhydrolase IB subunit beta isoform a               | 4505585          | 26         | 2               | 12                    | 12              |
| 585 | apolipoprotein A-IV precursor                                                      | 71773110         | 45         | 6               | 18                    | 12              |
| 586 | thioredoxin domain-containing protein 17                                           | 14249348         | 14         | 3               | 27                    | 12              |
| 587 | 60S ribosomal protein L14                                                          | 78000181         | 23         | 3               | 16                    | 12              |
| 588 | lysozyme-like protein 6 precursor                                                  | 9966905          | 17         | 3               | 42                    | 12              |
| 589 | acyl-coenzyme A thioesterase 13 isoform 2                                          | 231567183        | 12         | 4               | 45                    | 12              |
| 590 | thiosulfate sulfurtransferase/rhodanese-like domain-containing protein 1 isoform 1 | 163965377        | 13         | 3               | 44                    | 12              |
| 591 | renin receptor precursor                                                           | 15011918         | 39         | 3               | 17                    | 12              |
| 592 | splicing factor 3A subunit 3                                                       | 5803167          | 59         | 4               | 16                    | 12              |
| 593 | neutrophil elastase preproprotein                                                  | 4503549          | 29         | 5               | 33                    | 12              |
| 594 | zinc-alpha-2-glycoprotein precursor                                                | 4502337          | 34         | 5               | 23                    | 11              |
| 595 | mesencephalic astrocyte-derived neurotrophic factor precursor                      | 299523086        | 21         | 5               | 32                    | 11              |
| 596 | serine/threonine-protein phosphatase 2A 65 regulatory subunit A alpha isoform      | 21361399         | 65         | 5               | 10                    | 11              |
| 597 | adenylyl cyclase-associated protein 1                                              | 5453595          | 52         | 4               | 7.60                  | 11              |
| 598 | ecto-ADP-ribosyltransferase 3 isoform a precursor                                  | 194097380        | 44         | 4               | 9.80                  | 11              |
| 599 | alpha-1-antichymotrypsin precursor                                                 | 50659080         | 48         | 7               | 20                    | 11              |
| 600 | testis-specific H1 histone                                                         | 32401437         | 28         | 3               | 9.40                  | 11              |
| 601 | D-dopachrome decarboxylase                                                         | 4503291          | 13         | 4               | 37                    | 11              |
| 602 | beta-defensin 129 precursor                                                        | 18250304         | 20         | 3               | 16                    | 11              |
| 603 | histidine triad nucleotide-binding protein 2, mitochondrial precursor              | 14211923         | 17         | 3               | 27                    | 11              |
| 604 | lysosome membrane protein 2 isoform 1 precursor                                    | 5031631          | 54         | 3               | 11                    | 11              |
| 605 | alpha-soluble NSF attachment protein                                               | 47933379         | 33         | 5               | 25                    | 11              |
| 606 | acyl carrier protein, mitochondrial precursor                                      | 4826852          | 17         | 4               | 21                    | 11              |
| 607 | C-Myc-binding protein                                                              | 57242777         | 12         | 4               | 55                    | 11              |
| 608 | ribonuclease-like protein 13 precursor                                             | 59276062         | 18         | 3               | 18                    | 11              |
| 609 | vimentin                                                                           | 62414289         | 54         | 6               | 16                    | 11              |
| 610 | lysosomal alpha-glucosidase preproprotein                                          | 119393891        | 105        | 5               | 3.40                  | 11              |

Contd...

Supplementary Table 5: Contd...

| No  | Protein                                                                        | Accession number | Mass (kDa) | Peptides number | Sequence coverage (%) | Spectral counts |
|-----|--------------------------------------------------------------------------------|------------------|------------|-----------------|-----------------------|-----------------|
| 611 | cathepsin F precursor                                                          | 6042196          | 53         | 5               | 11                    | 11              |
| 612 | leucine zipper transcription factor-like protein 1                             | 9966793          | 35         | 3               | 8.70                  | 11              |
| 613 | dnaJ homolog subfamily B member 13                                             | 39204547         | 36         | 6               | 15                    | 11              |
| 614 | tryptophanyl-tRNA synthetase, cytoplasmic isoform b                            | 47419918         | 49         | 4               | 16                    | 11              |
| 615 | signal peptidase complex catalytic subunit SEC11A                              | 7657609          | 21         | 4               | 31                    | 11              |
| 616 | sulfatase-modifying factor 2 isoform e precursor                               | 194248090        | 39         | 4               | 14                    | 11              |
| 617 | aflatoxin B1 aldehyde reductase member 2                                       | 41327764         | 40         | 4               | 11                    | 11              |
| 618 | dynactin subunit 3 isoform 1                                                   | 6005745          | 21         | 4               | 19                    | 11              |
| 619 | cytochrome c oxidase subunit 6C proprotein                                     | 4758040          | 9          | 3               | 37                    | 11              |
| 620 | heat shock 70 protein 13 precursor                                             | 48928056         | 52         | 5               | 12                    | 11              |
| 621 | 60S ribosomal protein L11 isoform 1                                            | 15431290         | 20         | 3               | 17                    | 11              |
| 622 | 40S ribosomal protein S9                                                       | 14141193         | 23         | 6               | 25                    | 11              |
| 623 | ADP-ribosyl cyclase 1                                                          | 38454326         | 34         | 2               | 8.70                  | 11              |
| 624 | 40S ribosomal protein S19                                                      | 4506695          | 16         | 4               | 22                    | 11              |
| 625 | 4-trimethylaminobutyraldehyde dehydrogenase                                    | 115387104        | 56         | 4               | 4.60                  | 10              |
| 626 | galectin-3-binding protein precursor                                           | 5031863          | 65         | 4               | 8.20                  | 10              |
| 627 | proteasome subunit beta type-3                                                 | 22538465         | 23         | 5               | 39                    | 10              |
| 628 | receptor expression-enhancing protein 5                                        | 115430112        | 21         | 3               | 15                    | 10              |
| 629 | 26S proteasome non-ATPase regulatory subunit 6                                 | 7661914          | 46         | 6               | 18                    | 10              |
| 630 | cytochrome b-c1 complex subunit 6, mitochondrial                               | 83627705         | 11         | 4               | 58                    | 10              |
| 631 | metalloproteinase inhibitor 1 precursor                                        | 4507509          | 23         | 4               | 32                    | 10              |
| 632 | ras-related protein Rap-1b isoform 1 precursor                                 | 7661678          | 21         | 3               | 18                    | 10              |
| 633 | titin isoform N2-A                                                             | 291045225        | 3713       | 6               | 0.06                  | 10              |
| 634 | 40S ribosomal protein S25                                                      | 4506707          | 14         | 4               | 24                    | 10              |
| 635 | desmoplakin isoform I                                                          | 58530840         | 332        | 5               | 1.60                  | 10              |
| 636 | ATP synthase subunit delta, mitochondrial precursor                            | 50345991         | 17         | 3               | 42                    | 10              |
| 637 | atlastin-3                                                                     | 45827806         | 61         | 5               | 20                    | 10              |
| 638 | stress-induced-phosphoprotein 1                                                | 5803181          | 63         | 4               | 9.00                  | 10              |
| 639 | ras-related protein Ral-B                                                      | 4506405          | 23         | 3               | 26                    | 10              |
| 640 | 2-oxoglutarate dehydrogenase, mitochondrial isoform 3 precursor                | 259013553        | 116        | 5               | 3.50                  | 10              |
| 641 | thioredoxin domain-containing protein 3                                        | 148839372        | 67         | 6               | 13                    | 10              |
| 642 | mitochondrial import receptor subunit TOM22 homolog                            | 9910382          | 16         | 4               | 58                    | 10              |
| 643 | EF-hand domain-containing protein 1 isoform 1                                  | 156616292        | 74         | 5               | 4.70                  | 10              |
| 644 | ubiquitin thioesterase OTUB2                                                   | 12962939         | 27         | 5               | 30                    | 10              |
| 645 | nucleosome assembly protein 1-like 4                                           | 5174613          | 43         | 3               | 9.60                  | 10              |
| 646 | 60S ribosomal protein L18                                                      | 4506607          | 22         | 3               | 20                    | 10              |
| 647 | 40S ribosomal protein S20 isoform 1                                            | 226246671        | 16         | 3               | 19                    | 10              |
| 648 | protein FAM162A                                                                | 49355721         | 17         | 3               | 25                    | 10              |
| 649 | astrocytic phosphoprotein PEA-15                                               | 4505705          | 15         | 3               | 37                    | 10              |
| 650 | grancalcin                                                                     | 6912388          | 24         | 3               | 12                    | 10              |
| 651 | complement component 1 Q subcomponent-binding protein, mitochondrial precursor | 4502491          | 31         | 4               | 22                    | 9               |
| 652 | proteasome subunit beta type-2 isoform 1                                       | 4506195          | 23         | 3               | 23                    | 9               |
| 653 | ubiquitin carboxyl-terminal hydrolase 5 isoform 2                              | 148727247        | 93         | 3               | 4.90                  | 9               |
| 654 | 40S ribosomal protein S12                                                      | 14277700         | 15         | 3               | 20                    | 9               |
| 655 | coiled-coil domain-containing protein 105                                      | 226492892        | 57         | 5               | 10                    | 9               |
| 656 | sperm acrosome-associated protein 5 precursor                                  | 120952755        | 18         | 3               | 26                    | 9               |
| 657 | signal peptidase complex subunit 3                                             | 11345462         | 20         | 3               | 18                    | 9               |
| 658 | 40S ribosomal protein S8                                                       | 4506743          | 24         | 4               | 25                    | 9               |
| 659 | NADH dehydrogenase [ubiquinone] iron-sulfur protein 6, mitochondrial precursor | 4758792          | 14         | 3               | 40                    | 9               |
| 660 | BPI fold-containing family A member 3 isoform 1 precursor                      | 109627654        | 28         | 5               | 31                    | 9               |
| 661 | 60S ribosomal protein L7a                                                      | 4506661          | 30         | 3               | 15                    | 9               |
| 662 | calcium-binding and spermatid-specific protein 1                               | 90652863         | 43         | 3               | 12                    | 9               |

Contd...

Supplementary Table 5: Contd...

| No  | Protein                                                                           | Accession number | Mass (kDa) | Peptides number | Sequence coverage (%) | Spectral counts |
|-----|-----------------------------------------------------------------------------------|------------------|------------|-----------------|-----------------------|-----------------|
| 663 | F-actin-capping protein subunit alpha-1                                           | 5453597          | 33         | 4               | 10                    | 9               |
| 664 | transmembrane emp24 domain-containing protein 2 precursor                         | 5803149          | 23         | 3               | 24                    | 9               |
| 665 | eukaryotic translation elongation factor 1 epsilon-1 isoform 1                    | 4758862          | 20         | 4               | 35                    | 9               |
| 666 | COP9 signalosome complex subunit 8 isoform 1                                      | 5729779          | 23         | 2               | 17                    | 9               |
| 667 | carbonic anhydrase 2                                                              | 4557395          | 29         | 4               | 20                    | 9               |
| 668 | dnaJ homolog subfamily B member 6 isoform b                                       | 4885495          | 27         | 2               | 12                    | 9               |
| 669 | NADH-cytochrome b5 reductase 3 isoform 2                                          | 193794826        | 32         | 4               | 31                    | 9               |
| 670 | sialidase-1 precursor                                                             | 4557791          | 45         | 2               | 5.50                  | 9               |
| 671 | macrophage-capping protein                                                        | 63252913         | 38         | 4               | 12                    | 9               |
| 672 | mammaglobin-B precursor                                                           | 4505171          | 11         | 3               | 32                    | 9               |
| 673 | 60S ribosomal protein L35a                                                        | 16117791         | 13         | 4               | 16                    | 9               |
| 674 | metalloproteinase inhibitor 3 precursor                                           | 4507513          | 24         | 4               | 19                    | 9               |
| 675 | NADH dehydrogenase [ubiquinone] 1 alpha subcomplex subunit 2 isoform 1            | 4505355          | 11         | 3               | 31                    | 9               |
| 676 | phosphoglycolate phosphatase                                                      | 108796653        | 34         | 3               | 9.70                  | 9               |
| 677 | 14 phosphohistidine phosphatase isoform 3                                         | 24475861         | 14         | 3               | 38                    | 9               |
| 678 | spectrin alpha chain, brain isoform 2                                             | 154759259        | 285        | 5               | 3.00                  | 9               |
| 679 | brain protein 44                                                                  | 219521872        | 14         | 4               | 41                    | 9               |
| 680 | nicotinamide phosphoribosyltransferase precursor                                  | 5031977          | 56         | 5               | 12                    | 9               |
| 681 | prolargin precursor                                                               | 4506041          | 44         | 4               | 12                    | 9               |
| 682 | epoxide hydrolase 1 precursor                                                     | 209862837        | 53         | 6               | 12                    | 9               |
| 683 | drebrin-like protein isoform c                                                    | 171906575        | 49         | 4               | 12                    | 9               |
| 684 | 60S ribosomal protein L18a                                                        | 11415026         | 21         | 4               | 26                    | 9               |
| 685 | ectonucleotide pyrophosphatase/phosphodiesterase family member 3                  | 111160296        | 100        | 4               | 7.80                  | 8               |
| 686 | serine/threonine-protein phosphatase 2A catalytic subunit alpha isoform           | 4506017          | 36         | 3               | 16                    | 8               |
| 687 | tropomyosin alpha-4 chain isoform 1                                               | 223555975        | 33         | 5               | 11                    | 8               |
| 688 | kinesin-1 heavy chain                                                             | 4758648          | 110        | 5               | 3.50                  | 8               |
| 689 | glycerophosphodiester phosphodiesterase 1                                         | 7706617          | 38         | 3               | 11                    | 8               |
| 690 | lysosome-associated membrane glycoprotein 2 isoform C precursor                   | 169790833        | 45         | 3               | 7.10                  | 8               |
| 691 | synaptophysin-like protein 1 isoform a                                            | 5803185          | 29         | 3               | 15                    | 8               |
| 692 | ras-related protein Ral-A precursor                                               | 33946329         | 24         | 3               | 13                    | 8               |
| 693 | cytochrome b5 type B                                                              | 83921614         | 17         | 5               | 52                    | 8               |
| 694 | vitronectin precursor                                                             | 88853069         | 54         | 3               | 8.60                  | 8               |
| 695 | glutathione S-transferase omega-2 isoform 1                                       | 38016131         | 28         | 3               | 16%                   | 8               |
| 696 | endophilin-B1 isoform 2                                                           | 331284170        | 44         | 5               | 11                    | 8               |
| 697 | macrophage migration inhibitory factor                                            | 4505185          | 12         | 3               | 36                    | 8               |
| 698 | carcinoembryonic antigen-related cell adhesion molecule 6 precursor               | 40255013         | 37         | 3               | 17                    | 8               |
| 699 | 26S proteasome non-ATPase regulatory subunit 1 isoform 1                          | 25777600         | 106        | 4               | 5.40                  | 8               |
| 700 | trafficking protein particle complex subunit 3                                    | 7656926          | 20         | 3               | 20                    | 8               |
| 701 | COP9 signalosome complex subunit 4                                                | 38373690         | 46         | 3               | 11                    | 8               |
| 702 | septin-7 isoform 2                                                                | 148352329        | 51         | 3               | 11                    | 8               |
| 703 | Sjogren syndrome nuclear autoantigen 1                                            | 189571687        | 14         | 3               | 21                    | 8               |
| 704 | growth arrest-specific protein 6 isoform 1 precursor                              | 4557617          | 75         | 5               | 12                    | 8               |
| 705 | NADH dehydrogenase [ubiquinone] flavoprotein 1, mitochondrial isoform 1 precursor | 20149568         | 51         | 3               | 12                    | 8               |
| 706 | abhydrolase domain-containing protein 10, mitochondrial precursor                 | 8923001          | 34         | 4               | 21                    | 8               |
| 707 | calmin                                                                            | 19923599         | 112        | 4               | 7.00                  | 8               |
| 708 | dnaJ homolog subfamily B member 1                                                 | 5453690          | 38         | 4               | 14                    | 8               |
| 709 | A disintegrin and metalloproteinase with thrombospondin motifs 1 preproprotein    | 50845384         | 105        | 3               | 4.60                  | 8               |
| 710 | lipase member I                                                                   | 39752679         | 55         | 3               | 6.70                  | 8               |
| 711 | proteasome activator complex subunit 2                                            | 30410792         | 27         | 3               | 18                    | 8               |
| 712 | agouti-related protein precursor                                                  | 4501995          | 14         | 2               | 14                    | 8               |
| 713 | ras-related protein Rab-27A                                                       | 34485709         | 25         | 3               | 16                    | 8               |
| 714 | dynein light chain roadblock-type 2                                               | 18702323         | 11         | 2               | 39                    | 8               |
| 715 | vesicle-trafficking protein SEC22b precursor                                      | 94429050         | 25         | 2               | 12                    | 8               |
| 716 | ethanolamine-phosphate cytidylyltransferase isoform 1                             | 296841136        | 46         | 4               | 14                    | 8               |

Contd...

Supplementary Table 5: Contd...

| No  | Protein                                                                        | Accession number | Mass (kDa) | Peptides number | Sequence coverage (%) | Spectral counts |
|-----|--------------------------------------------------------------------------------|------------------|------------|-----------------|-----------------------|-----------------|
| 717 | 60S ribosomal protein L30                                                      | 4506631          | 13         | 4               | 51                    | 8               |
| 718 | metaxin-2                                                                      | 5729937          | 30         | 5               | 22                    | 8               |
| 719 | prostate and testis expressed protein 4                                        | 221554530        | 11         | 3               | 31                    | 8               |
| 720 | junction plakoglobin                                                           | 12056468         | 82         | 4               | 5.40                  | 8               |
| 721 | left-right determination factor 1 preproprotein                                | 10337603         | 41         | 3               | 10                    | 8               |
| 722 | thioredoxin-like protein 1                                                     | 4759274          | 32         | 3               | 11                    | 8               |
| 723 | reticulocalbin-1 precursor                                                     | 4506455          | 39         | 4               | 16                    | 8               |
| 724 | basement membrane-specific heparan sulfate proteoglycan core protein precursor | 126012571        | 469        | 3               | 1.10                  | 7               |
| 725 | nuclear pore membrane glycoprotein 210 precursor                               | 27477134         | 205        | 3               | 2.00                  | 7               |
| 726 | zymogen granule protein 16 homolog B precursor                                 | 94536866         | 23         | 3               | 17                    | 7               |
| 727 | calcium/calmodulin-dependent protein kinase type II subunit delta isoform 2    | 26667189         | 54         | 4               | 5.00                  | 7               |
| 728 | serine/threonine-protein phosphatase with EF-hands 1 isoform 1b                | 23312374         | 73         | 3               | 8.00                  | 7               |
| 729 | succinyl-CoA ligase [ADP-forming] subunit beta, mitochondrial precursor        | 11321583         | 50         | 3               | 7.80                  | 7               |
| 730 | basigin isoform 2 precursor                                                    | 38372925         | 29         | 3               | 17                    | 7               |
| 731 | prostate and testis expressed protein 2 precursor                              | 47086459         | 13         | 3               | 28                    | 7               |
| 732 | proteasome activator complex subunit 4                                         | 163644283        | 211        | 4               | 3.60                  | 7               |
| 733 | cytosolic 5'-nucleotidase 1B isoform 4                                         | 312283642        | 71         | 5               | 12                    | 7               |
| 734 | dermcidin preproprotein                                                        | 16751921         | 11         | 3               | 23                    | 7               |
| 735 | disintegrin and metalloproteinase domain-containing protein 30 preproprotein   | 31881770         | 89         | 3               | 3.80                  | 7               |
| 736 | adenylate kinase 2, mitochondrial isoform a                                    | 4502013          | 26         | 4               | 28                    | 7               |
| 737 | acyl-protein thioesterase 1                                                    | 5453722          | 25         | 3               | 17                    | 7               |
| 738 | thioredoxin-dependent peroxide reductase, mitochondrial isoform b              | 32483377         | 26         | 2               | 9.70                  | 7               |
| 739 | transmembrane emp24 domain-containing protein 1 precursor                      | 5803040          | 25         | 3               | 18                    | 7               |
| 740 | NADH dehydrogenase [ubiquinone] iron-sulfur protein 8, mitochondrial precursor | 4505371          | 24         | 3               | 15                    | 7               |
| 741 | adenylate kinase 8                                                             | 22749187         | 55         | 4               | 10                    | 7               |
| 742 | uncharacterized protein C9orf171                                               | 46409466         | 36         | 3               | 10                    | 7               |
| 743 | NADH dehydrogenase [ubiquinone] 1 beta subcomplex subunit 7                    | 10764847         | 16         | 3               | 19                    | 7               |
| 744 | ras-related protein Rab-5B isoform 1                                           | 354725902        | 24         | 2               | 23                    | 7               |
| 745 | S-formylglutathione hydrolase                                                  | 33413400         | 31         | 4               | 28                    | 7               |
| 746 | GTP-binding protein SAR1a                                                      | 217416369        | 22         | 3               | 15                    | 7               |
| 747 | translocon-associated protein subunit delta isoform 3 precursor                | 325301078        | 20         | 2               | 13                    | 7               |
| 748 | B-cell receptor-associated protein 31 isoform a                                | 213511508        | 35         | 4               | 14                    | 7               |
| 749 | probable ergosterol biosynthetic protein 28                                    | 6005719          | 16         | 3               | 26                    | 7               |
| 750 | beta-defensin 105 precursor                                                    | 103485141        | 9          | 3               | 27                    | 7               |
| 751 | protein transport protein Sec61 subunit beta                                   | 5803165          | 10         | 3               | 38                    | 7               |
| 752 | chitinase domain-containing protein 1 isoform a                                | 218083142        | 45         | 4               | 12                    | 7               |
| 753 | biglycan preproprotein                                                         | 4502403          | 42         | 3               | 9.50                  | 7               |
| 754 | dnaJ homolog subfamily C member 3 precursor                                    | 5453980          | 58         | 3               | 10                    | 7               |
| 755 | cytochrome c oxidase subunit 6A1, mitochondrial precursor                      | 17999528         | 12         | 2               | 43                    | 7               |
| 756 | eukaryotic translation initiation factor 3 subunit A                           | 4503509          | 167        | 4               | 2.90                  | 7               |
| 757 | coatamer subunit epsilon isoform a                                             | 31542319         | 34         | 3               | 16                    | 7               |
| 758 | epididymal secretory protein E1 precursor                                      | 5453678          | 17         | 3               | 24                    | 6               |
| 759 | fructose-1,6-bisphosphatase 1                                                  | 189083692        | 37         | 2               | 8.30                  | 6               |
| 760 | complement decay-accelerating factor isoform 2 precursor                       | 168693643        | 49         | 3               | 9.10                  | 6               |
| 761 | general vesicular transport factor p115                                        | 4505541          | 108        | 3               | 3.00                  | 6               |
| 762 | peptidase M20 domain-containing protein 2                                      | 58082085         | 48         | 3               | 13                    | 6               |
| 763 | ferritin light chain                                                           | 20149498         | 20         | 2               | 18                    | 6               |
| 764 | cathepsin D preproprotein                                                      | 4503143          | 45         | 3               | 12                    | 6               |
| 765 | malate dehydrogenase, cytoplasmic isoform 1                                    | 312283701        | 39         | 4               | 16                    | 6               |
| 766 | alpha-mannosidase 2C1                                                          | 46852164         | 116        | 4               | 5.10                  | 6               |
| 767 | carboxypeptidase M precursor                                                   | 6631081          | 51         | 2               | 3.80                  | 6               |
| 768 | uncharacterized protein C6orf81                                                | 31542280         | 41         | 2               | 7.60                  | 6               |
| 769 | fumarylacetoacetate hydrolase domain-containing protein 2B                     | 40786394         | 35         | 2               | 11                    | 6               |

Contd...

Supplementary Table 5: Contd...

| No  | Protein                                                                      | Accession number | Mass (kDa) | Peptides number | Sequence coverage (%) | Spectral counts |
|-----|------------------------------------------------------------------------------|------------------|------------|-----------------|-----------------------|-----------------|
| 770 | CD9 antigen                                                                  | 4502693          | 25         | 2               | 9.60                  | 6               |
| 771 | carboxypeptidase D isoform 1 precursor                                       | 22202611         | 153        | 4               | 4.10                  | 6               |
| 772 | disintegrin and metalloproteinase domain-containing protein 29 preproprotein | 73765552         | 93         | 2               | 2.90                  | 6               |
| 773 | nuclear pore complex protein Nup205                                          | 57634534         | 228        | 4               | 2.20                  | 6               |
| 774 | prostaglandin-H2 D-isomerase precursor                                       | 32171249         | 21         | 3               | 21                    | 6               |
| 775 | prostaglandin E synthase 3                                                   | 23308579         | 19         | 2               | 17                    | 6               |
| 776 | aspartyl-tRNA synthetase, cytoplasmic                                        | 45439306         | 57         | 3               | 6.80                  | 6               |
| 777 | thioredoxin domain-containing protein 2 isoform 2                            | 148727319        | 60         | 2               | 3.30                  | 6               |
| 778 | protein ALEX XLas                                                            | 117938759        | 111        | 3               | 4.60                  | 6               |
| 779 | cystatin-B                                                                   | 4503117          | 11         | 2               | 24                    | 6               |
| 780 | sortilin isoform 1 preproprotein                                             | 17149834         | 92         | 4               | 5.80                  | 6               |
| 781 | elongation factor 1-beta                                                     | 4503477          | 25         | 3               | 30                    | 6               |
| 782 | adenylate kinase 7                                                           | 148727333        | 83         | 3               | 3.70                  | 6               |
| 783 | 60S ribosomal protein L12                                                    | 4506597          | 18         | 2               | 15                    | 6               |
| 784 | BAG family molecular chaperone regulator 5 isoform b                         | 6631077          | 51         | 3               | 11                    | 6               |
| 785 | ATPase inhibitor, mitochondrial isoform 1 precursor                          | 7705927          | 12         | 3               | 18                    | 6               |
| 786 | tripeptidyl-peptidase 1 preproprotein                                        | 5729770          | 61         | 3               | 11                    | 6               |
| 787 | clathrin light chain A isoform a                                             | 4502899          | 24         | 3               | 17                    | 6               |
| 788 | antileukoproteinase precursor                                                | 4507065          | 14         | 2               | 15                    | 6               |
| 789 | phospholipase A2, membrane associated precursor                              | 239915991        | 16         | 2               | 18                    | 6               |
| 790 | ATP5J2-PTCD1 fusion protein                                                  | 311893396        | 84         | 2               | 3.20                  | 6               |
| 791 | prenylated Rab acceptor protein 1                                            | 222144309        | 21         | 2               | 16                    | 6               |
| 792 | actin-like protein 9                                                         | 194097462        | 46         | 3               | 11                    | 6               |
| 793 | bifunctional purine biosynthesis protein PURH                                | 20127454         | 65         | 4               | 7.30                  | 6               |
| 794 | arfaptin-1 isoform 1                                                         | 71040094         | 42         | 2               | 4.80                  | 6               |
| 795 | profilin-3                                                                   | 71274140         | 15         | 3               | 35                    | 6               |
| 796 | cystatin-C precursor                                                         | 4503107          | 16         | 3               | 32                    | 6               |
| 797 | beta-hexosaminidase subunit alpha preproprotein                              | 189181666        | 61         | 3               | 9.30                  | 6               |
| 798 | 60S ribosomal protein L7                                                     | 15431301         | 29         | 4               | 20                    | 6               |
| 799 | apolipoprotein O precursor                                                   | 13129148         | 22         | 3               | 19                    | 6               |
| 800 | protein CutA isoform 1                                                       | 62198241         | 21         | 2               | 21                    | 6               |
| 801 | sperm-associated antigen 11B isoform A preproprotein                         | 7706551          | 11         | 2               | 19                    | 6               |
| 802 | actin-related protein 2/3 complex subunit 4 isoform c                        | 311771647        | 22         | 2               | 12                    | 6               |
| 803 | prostaglandin reductase 1 isoform 1                                          | 226059133        | 36         | 3               | 7.60                  | 6               |
| 804 | brain protein 44-like protein 2                                              | 306922396        | 15         | 3               | 27                    | 6               |
| 805 | aquaporin-5                                                                  | 4502183          | 28         | 2               | 9.80                  | 6               |
| 806 | charged multivesicular body protein 4b                                       | 28827795         | 25         | 2               | 11                    | 6               |
| 807 | synaptogyrin-2                                                               | 4759202          | 25         | 2               | 8.00                  | 6               |
| 808 | 60S ribosomal protein L38                                                    | 4506645          | 8          | 2               | 36                    | 6               |
| 809 | minor histocompatibility antigen H13 isoform 1                               | 23308607         | 41         | 2               | 9.50                  | 6               |
| 810 | spectrin beta chain, brain 1 isoform 1                                       | 112382250        | 275        | 5               | 3.00                  | 6               |
| 811 | transgelin-2                                                                 | 4507357          | 22         | 3               | 16                    | 6               |
| 812 | 60S ribosomal protein L27a                                                   | 4506625          | 17         | 2               | 16                    | 6               |
| 813 | RPL17-C18orf32 protein isoform 1                                             | 313569822        | 26         | 2               | 11                    | 6               |
| 814 | protein S100-A12                                                             | 5032059          | 11         | 2               | 23                    | 6               |
| 815 | sulfotransferase family cytosolic 2B member 1 isoform a                      | 31563388         | 40         | 3               | 10                    | 6               |
| 816 | peptidyl-prolyl cis-trans isomerase FKBP11 isoform 1 precursor               | 7706131          | 22         | 3               | 26                    | 6               |
| 817 | prostaglandin E synthase                                                     | 4758910          | 17         | 3               | 14                    | 6               |
| 818 | cylicin-2                                                                    | 4557509          | 39         | 2               | 8.30                  | 6               |
| 819 | superoxide dismutase [Cu-Zn]                                                 | 4507149          | 16         | 2               | 32                    | 5               |
| 820 | inositol monophosphatase 1 isoform 2                                         | 221625487        | 37         | 3               | 14                    | 5               |
| 821 | calpain-1 catalytic subunit                                                  | 311893363        | 82         | 3               | 5.90                  | 5               |
| 822 | proactivator polypeptide isoform a preproprotein                             | 11386147         | 58         | 2               | 4.00                  | 5               |

Contd...



Supplementary Table 5: Contd...

| No  | Protein                                                                              | Accession number | Mass (kDa) | Peptides number | Sequence coverage (%) | Spectral counts |
|-----|--------------------------------------------------------------------------------------|------------------|------------|-----------------|-----------------------|-----------------|
| 823 | beta-microseminoprotein isoform a precursor                                          | 4557036          | 13         | 2               | 8.80                  | 5               |
| 824 | 60S ribosomal protein L5                                                             | 14591909         | 34         | 2               | 11                    | 5               |
| 825 | alpha-aminoadipic semialdehyde dehydrogenase isoform 2                               | 319655561        | 55         | 2               | 10.00                 | 5               |
| 826 | histone H1.3                                                                         | 4885377          | 22         | 2               | 9.50                  | 5               |
| 827 | mRNA export factor                                                                   | 62739173         | 41         | 3               | 13                    | 5               |
| 828 | inorganic pyrophosphatase 2, mitochondrial isoform 1 precursor                       | 29171702         | 38         | 3               | 10                    | 5               |
| 829 | LETM1 and EF-hand domain-containing protein 1, mitochondrial precursor               | 6912482          | 83         | 3               | 4.30                  | 5               |
| 830 | matrilin-2 isoform a precursor                                                       | 62548860         | 107        | 2               | 3.20                  | 5               |
| 831 | ATP synthase subunit epsilon, mitochondrial                                          | 5901896          | 6          | 3               | 45                    | 5               |
| 832 | F-actin-capping protein subunit alpha-3                                              | 15277417         | 35         | 3               | 18                    | 5               |
| 833 | phospholipase A1 member A isoform 2 precursor                                        | 332688256        | 48         | 2               | 7.30                  | 5               |
| 834 | long-chain-fatty-acid--CoA ligase 6 isoform e                                        | 327412327        | 79         | 3               | 6.60                  | 5               |
| 835 | arginyl-tRNA synthetase, cytoplasmic                                                 | 15149476         | 75         | 3               | 7.60                  | 5               |
| 836 | lysosomal Pro-X carboxypeptidase isoform 1 preproprotein                             | 4826940          | 56         | 3               | 11                    | 5               |
| 837 | cell cycle control protein 50A isoform 1                                             | 8922720          | 41         | 3               | 8.00                  | 5               |
| 838 | protein NDRG3 isoform a                                                              | 14165266         | 41         | 3               | 11                    | 5               |
| 839 | bifunctional ATP-dependent dihydroxyacetone kinase/FAD-AMP lyase (cyclizing)         | 20149621         | 59         | 2               | 5.70                  | 5               |
| 840 | EF-hand domain-containing protein KIAA0494                                           | 7662160          | 55         | 2               | 6.10                  | 5               |
| 841 | chloride intracellular channel protein 4                                             | 7330335          | 29         | 2               | 7.90                  | 5               |
| 842 | melanoma inhibitory activity protein 3 precursor                                     | 122891870        | 214        | 3               | 1.90                  | 5               |
| 843 | UPF0733 protein C2orf88                                                              | 110349742        | 11         | 2               | 41                    | 5               |
| 844 | UPF0740 protein C1orf192                                                             | 63029930         | 19         | 3               | 22                    | 5               |
| 845 | kinectin isoform a                                                                   | 33620775         | 156        | 3               | 2.40                  | 5               |
| 846 | nucleoporin NUP53                                                                    | 31982904         | 35         | 2               | 9.80                  | 5               |
| 847 | voltage-dependent calcium channel subunit alpha-2/delta-2 isoform c                  | 291290994        | 130        | 3               | 3.50                  | 5               |
| 848 | EF-hand calcium-binding domain-containing protein 1 isoform a                        | 13375787         | 24         | 2               | 13                    | 5               |
| 849 | puromycin-sensitive aminopeptidase                                                   | 158937236        | 103        | 2               | 2.70                  | 5               |
| 850 | pro-cathepsin H preproprotein                                                        | 23110955         | 37         | 2               | 8.40                  | 5               |
| 851 | actin-like protein 7A                                                                | 5729720          | 49         | 4               | 18                    | 5               |
| 852 | retinal dehydrogenase 1                                                              | 21361176         | 55         | 3               | 7.80                  | 5               |
| 853 | ADP-ribosylation factor-like protein 3                                               | 4757774          | 20         | 3               | 24                    | 5               |
| 854 | PREDICTED: hypothetical protein LOC728597                                            | 341914388        | 72         | 2               | 3.10                  | 5               |
| 855 | serine/threonine-protein phosphatase 2A activator isoform b                          | 29725611         | 37         | 2               | 13                    | 5               |
| 856 | peptidase inhibitor 15 preproprotein                                                 | 7705676          | 29         | 3               | 15                    | 5               |
| 857 | secretoglobin family 1D member 2 precursor                                           | 5729909          | 10         | 2               | 22                    | 5               |
| 858 | NADH dehydrogenase [ubiquinone] 1 beta subcomplex subunit 8, mitochondrial precursor | 4826854          | 22         | 2               | 11                    | 5               |
| 859 | 40S ribosomal protein S7                                                             | 4506741          | 22         | 2               | 18                    | 5               |
| 860 | protein S100-A6                                                                      | 7657532          | 10         | 2               | 17                    | 5               |
| 861 | uncharacterized protein C19orf18 precursor                                           | 22748999         | 24         | 2               | 9.80                  | 5               |
| 862 | inorganic pyrophosphatase                                                            | 11056044         | 33         | 3               | 18                    | 5               |
| 863 | NADH dehydrogenase [ubiquinone] iron-sulfur protein 5                                | 4758790          | 13         | 2               | 14                    | 5               |
| 864 | 60S ribosomal protein L31 isoform 3                                                  | 153252132        | 14         | 2               | 19                    | 5               |
| 865 | protein OS-9 isoform 1 precursor                                                     | 5803109          | 76         | 2               | 4.90                  | 5               |
| 866 | eukaryotic translation initiation factor 3 subunit B                                 | 33239445         | 92         | 2               | 2.30                  | 5               |
| 867 | ras GTPase-activating-like protein IQGAP2                                            | 116089337        | 181        | 2               | 2.20                  | 5               |
| 868 | protein-glutamine gamma-glutamyltransferase 2 isoform a                              | 39777597         | 77         | 2               | 4.20                  | 5               |
| 869 | eukaryotic translation initiation factor 3 subunit C                                 | 153791492        | 105        | 3               | 3.30                  | 5               |
| 870 | galectin-1                                                                           | 4504981          | 15         | 2               | 18                    | 5               |
| 871 | legumain preproprotein                                                               | 56682962         | 49         | 2               | 4.60                  | 5               |
| 872 | NADH dehydrogenase [ubiquinone] 1 beta subcomplex subunit 4 isoform 1                | 6041669          | 15         | 2               | 22                    | 5               |
| 873 | transketolase                                                                        | 205277463        | 68         | 3               | 9.50                  | 4               |
| 874 | acylamino-acid-releasing enzyme                                                      | 23510451         | 81         | 3               | 6.60                  | 4               |
| 875 | platelet-activating factor acetylhydrolase precursor                                 | 270133071        | 50         | 2               | 9.80                  | 4               |

Contd...

Supplementary Table 5: Contd...

| No  | Protein                                                                               | Accession number | Mass (kDa) | Peptides number | Sequence coverage (%) | Spectral counts |
|-----|---------------------------------------------------------------------------------------|------------------|------------|-----------------|-----------------------|-----------------|
| 876 | UPF0577 protein KIAA1324 precursor                                                    | 38569482         | 111        | 2               | 2.10                  | 4               |
| 877 | apolipoprotein D precursor                                                            | 4502163          | 21         | 2               | 9.50                  | 4               |
| 878 | prostate stem cell antigen preproprotein                                              | 289547757        | 12         | 2               | 25                    | 4               |
| 879 | alcohol dehydrogenase class-3                                                         | 71565154         | 40         | 2               | 8.00                  | 4               |
| 880 | cystatin-S precursor                                                                  | 4503109          | 16         | 2               | 18                    | 4               |
| 881 | nitrilase homolog 1 isoform 3                                                         | 297632348        | 34         | 2               | 7.40                  | 4               |
| 882 | alpha-1-acid glycoprotein 1 precursor                                                 | 167857790        | 24         | 2               | 12                    | 4               |
| 883 | EGF-like repeat and discoidin I-like domain-containing protein 3 precursor            | 31317224         | 54         | 2               | 5.80                  | 4               |
| 884 | midkine precursor                                                                     | 4505135          | 16         | 2               | 17                    | 4               |
| 885 | plasma glutamate carboxypeptidase precursor                                           | 7706387          | 52         | 2               | 4.20                  | 4               |
| 886 | kelch-like protein 10                                                                 | 148664209        | 69         | 2               | 3.30                  | 4               |
| 887 | nuclear transport factor 2                                                            | 5031985          | 14         | 2               | 17                    | 4               |
| 888 | S-phase kinase-associated protein 1 isoform b                                         | 25777713         | 19         | 2               | 15                    | 4               |
| 889 | multifunctional protein ADE2 isoform 2                                                | 5453539          | 47         | 2               | 6.10                  | 4               |
| 890 | desmoglein-1 preproprotein                                                            | 119703744        | 114        | 3               | 3.90                  | 4               |
| 891 | integrin beta-1 isoform 1D precursor                                                  | 19743819         | 89         | 2               | 2.60                  | 4               |
| 892 | heat shock 70 protein 4                                                               | 38327039         | 94         | 2               | 3.20                  | 4               |
| 893 | aldehyde dehydrogenase family 1 member A3                                             | 153266822        | 56         | 2               | 4.70                  | 4               |
| 894 | S-adenosylmethionine synthase isoform type-2                                          | 5174529          | 44         | 2               | 7.10                  | 4               |
| 895 | fibrous sheath-interacting protein 2                                                  | 297206791        | 790        | 2               | 0.31                  | 4               |
| 896 | phosphate carrier protein, mitochondrial isoform b precursor                          | 47132595         | 40         | 2               | 5.30                  | 4               |
| 897 | asparaginyl-tRNA synthetase, cytoplasmic                                              | 4758762          | 63         | 2               | 3.60                  | 4               |
| 898 | glutathione S-transferase omega-1 isoform 1                                           | 4758484          | 28         | 2               | 7.50                  | 4               |
| 899 | STE20/SPS1-related proline-alanine-rich protein kinase                                | 115430252        | 59         | 3               | 11                    | 4               |
| 900 | eukaryotic translation initiation factor 3 subunit M                                  | 23397429         | 43         | 2               | 8.60                  | 4               |
| 901 | 40S ribosomal protein SA                                                              | 59859885         | 33         | 2               | 14                    | 4               |
| 902 | translin-associated protein X                                                         | 5174731          | 33         | 2               | 10                    | 4               |
| 903 | enoyl-CoA delta isomerase 2, mitochondrial isoform 2                                  | 260274832        | 44         | 2               | 9.90                  | 4               |
| 904 | HD domain-containing protein 2                                                        | 116875826        | 23         | 2               | 15                    | 4               |
| 905 | eukaryotic translation initiation factor 3 subunit I                                  | 4503513          | 37         | 2               | 6.50                  | 4               |
| 906 | leucine-rich repeat-containing protein 23 isoform a                                   | 42542396         | 40         | 3               | 16                    | 4               |
| 907 | cancer/testis antigen 47A                                                             | 121949786        | 30         | 2               | 7.60                  | 4               |
| 908 | mitochondrial import receptor subunit TOM34                                           | 21361356         | 35         | 3               | 13                    | 4               |
| 909 | serine protease HTRA1 precursor                                                       | 4506141          | 51         | 2               | 8.50                  | 4               |
| 910 | transcriptional activator protein Pur-alpha                                           | 5032007          | 35         | 2               | 11                    | 4               |
| 911 | integral membrane protein 2B                                                          | 11527402         | 30         | 2               | 8.60                  | 4               |
| 912 | intraflagellar transport protein 27 homolog isoform 2                                 | 6857824          | 20         | 2               | 13                    | 4               |
| 913 | sperm-associated antigen 11B isoform D preproprotein                                  | 126131097        | 15         | 2               | 17                    | 4               |
| 914 | dynein intermediate chain 1, axonemal                                                 | 6912338          | 79         | 2               | 3.60                  | 4               |
| 915 | prohibitin-2 isoform 2                                                                | 6005854          | 33         | 2               | 8.40                  | 4               |
| 916 | 60S ribosomal protein L24                                                             | 4506619          | 18         | 2               | 13                    | 4               |
| 917 | glycyl-tRNA synthetase precursor                                                      | 116805340        | 83         | 3               | 4.90                  | 4               |
| 918 | ATP synthase-coupling factor 6, mitochondrial isoform a precursor                     | 18644883         | 13         | 2               | 27                    | 4               |
| 919 | thioredoxin domain-containing protein 12 precursor                                    | 7705696          | 19         | 2               | 14                    | 4               |
| 920 | coiled-coil domain-containing protein 42A isoform 1                                   | 226494053        | 38         | 2               | 8.90                  | 4               |
| 921 | L-amino-acid oxidase isoform 2 precursor                                              | 27477089         | 65         | 3               | 5.80                  | 4               |
| 922 | vesicle-associated membrane protein 8                                                 | 14043026         | 11         | 2               | 23                    | 4               |
| 923 | 40S ribosomal protein S11                                                             | 4506681          | 18         | 2               | 11                    | 4               |
| 924 | cytochrome b-c1 complex subunit 9 isoform a                                           | 41281885         | 7          | 2               | 38                    | 4               |
| 925 | NADH dehydrogenase [ubiquinone] 1 beta subcomplex subunit 11, mitochondrial isoform 1 | 20127561         | 18         | 2               | 11                    | 4               |
| 926 | neuropilin-1 isoform a precursor                                                      | 182508169        | 103        | 2               | 3.10                  | 4               |
| 927 | quinone oxidoreductase isoform a                                                      | 13236495         | 35         | 3               | 12                    | 4               |
| 928 | 60S ribosomal protein L13 isoform 1                                                   | 15431295         | 24         | 2               | 9.50                  | 4               |
| 929 | sorcin isoform b                                                                      | 38679884         | 20         | 2               | 11                    | 4               |
| 930 | glutaredoxin-related protein 5, mitochondrial precursor                               | 42516576         | 17         | 2               | 14                    | 4               |

Contd...

Supplementary Table 5: Contd...

| No  | Protein                                                                             | Accession number | Mass (kDa) | Peptides number | Sequence coverage (%) | Spectral counts |
|-----|-------------------------------------------------------------------------------------|------------------|------------|-----------------|-----------------------|-----------------|
| 931 | kita-kyushu lung cancer antigen 1                                                   | 63025190         | 13         | 2               | 19                    | 4               |
| 932 | nucleobindin-1 precursor                                                            | 20070228         | 54         | 2               | 6.30                  | 4               |
| 933 | putative peptidyl-tRNA hydrolase PTRHD1                                             | 61966781         | 16         | 2               | 25                    | 4               |
| 934 | ADP-ribosylation factor 6                                                           | 4502211          | 20         | 2               | 12                    | 4               |
| 935 | filaggrin-2                                                                         | 62122917         | 248        | 2               | 1.30                  | 4               |
| 936 | 40S ribosomal protein S13                                                           | 4506685          | 17         | 2               | 8.60                  | 4               |
| 937 | outer dense fiber protein 1                                                         | 194248060        | 28         | 2               | 6.40                  | 4               |
| 938 | tropomodulin-3                                                                      | 7657649          | 40         | 2               | 6.00                  | 4               |
| 939 | estradiol 17-beta-dehydrogenase 12                                                  | 7705855          | 34         | 3               | 14                    | 4               |
| 940 | metalloreductase STEAP4 isoform 1                                                   | 328887949        | 52         | 2               | 8.90                  | 4               |
| 941 | endophilin-A3                                                                       | 223468657        | 39         | 2               | 7.20                  | 4               |
| 942 | uncharacterized protein C17orf47                                                    | 332801054        | 63         | 2               | 5.10                  | 4               |
| 943 | tRNA methyltransferase 112 homolog                                                  | 7705477          | 14         | 2               | 22                    | 4               |
| 944 | lymphocyte antigen 6K isoform 1 precursor                                           | 237820711        | 19         | 2               | 14                    | 4               |
| 945 | catalase .                                                                          | 4557014          | 60         | 2               | 6.80                  | 3               |
| 946 | ester hydrolase C11orf54                                                            | 21361495         | 29         | 2               | 7.90                  | 3               |
| 947 | calmegin precursor                                                                  | 4758004          | 70         | 2               | 3.40                  | 3               |
| 948 | serine/threonine-protein phosphatase 2B catalytic subunit alpha isoform isoform 2   | 194688147        | 58         | 3               | 6.10                  | 3               |
| 949 | deoxyguanosine kinase, mitochondrial isoform a precursor                            | 18426967         | 32         | 3               | 17                    | 3               |
| 950 | neurofilament heavy polypeptide                                                     | 32483416         | 112        | 2               | 2.50                  | 3               |
| 951 | transketolase-like protein 1 isoform b                                              | 225637461        | 65         | 2               | 5.10                  | 3               |
| 952 | sarcoplasmic/endoplasmic reticulum calcium ATPase 2 isoform b                       | 24638454         | 115        | 2               | 2.50                  | 3               |
| 953 | acetyl-CoA acetyltransferase, cytosolic                                             | 148539872        | 41         | 2               | 8.60                  | 3               |
| 954 | plasma membrane calcium-transporting ATPase 4 isoform 4b                            | 48255957         | 134        | 3               | 3.80                  | 3               |
| 955 | exportin-7                                                                          | 154448892        | 124        | 3               | 3.40                  | 3               |
| 956 | coronin-1B                                                                          | 14149734         | 54         | 2               | 3.90                  | 3               |
| 957 | disintegrin and metalloproteinase domain-containing protein 7 preproprotein         | 114326453        | 86         | 2               | 4.00                  | 3               |
| 958 | dynein light chain 1, axonemal isoform 1                                            | 164607156        | 22         | 3               | 16                    | 3               |
| 959 | eukaryotic translation initiation factor 6 isoform a                                | 4504771          | 27         | 2               | 9.80                  | 3               |
| 960 | mitochondrial dicarboxylate carrier                                                 | 20149598         | 31         | 2               | 11                    | 3               |
| 961 | protein Niban                                                                       | 16757970         | 103        | 2               | 2.80                  | 3               |
| 962 | deoxyuridine 5'-triphosphate nucleotidohydrolase, mitochondrial isoform 1 precursor | 70906441         | 27         | 2               | 12                    | 3               |
| 963 | diablo homolog, mitochondrial isoform 1 precursor                                   | 9845297          | 27         | 2               | 9.60                  | 3               |
| 964 | 26S proteasome non-ATPase regulatory subunit 4                                      | 5292161          | 41         | 2               | 7.70                  | 3               |
| 965 | UBX domain-containing protein 11 isoform 1                                          | 116734681        | 54         | 2               | 5.70                  | 3               |
| 966 | UPF0587 protein C1orf123                                                            | 8923541          | 18         | 2               | 25                    | 3               |
| 967 | thiamine-triphosphatase                                                             | 13236577         | 26         | 2               | 18                    | 3               |
| 968 | transmembrane protein 126A isoform 1                                                | 14150017         | 22         | 2               | 24                    | 3               |
| 969 | myeloid-associated differentiation marker                                           | 19923903         | 35         | 2               | 10                    | 3               |
| 970 | NAD-dependent malic enzyme, mitochondrial isoform 1 precursor [Homo                 | 4505145          | 65         | 2               | 9.40                  | 3               |
| 971 | protein TSC21                                                                       | 22749357         | 21         | 2               | 13                    | 3               |
| 972 | cytochrome b5 domain-containing protein 1                                           | 40255060         | 27         | 2               | 16                    | 3               |
| 973 | NADH dehydrogenase [ubiquinone] iron-sulfur protein 4, mitochondrial precursor      | 4505369          | 20         | 2               | 14                    | 3               |
| 974 | beta-defensin 106 precursor                                                         | 22748611         | 7          | 2               | 23                    | 3               |
| 975 | uncharacterized protein C2orf74 isoform 1                                           | 221139892        | 22         | 2               | 11                    | 3               |
| 976 | ubiquitin carboxyl-terminal hydrolase 7                                             | 150378533        | 128        | 3               | 4.40                  | 3               |
| 977 | 6-phosphogluconolactonase                                                           | 6912586          | 28         | 2               | 16                    | 3               |
| 978 | glutathione peroxidase 1 isoform 1                                                  | 41406084         | 22         | 2               | 17                    | 3               |
| 979 | early endosome antigen 1                                                            | 55770888         | 162        | 2               | 1.80                  | 3               |
| 980 | 40S ribosomal protein S24 isoform a                                                 | 14916501         | 15         | 2               | 21                    | 3               |
| 981 | methylosome protein 50                                                              | 13129110         | 37         | 2               | 8.50                  | 3               |
| 982 | COP9 signalosome complex subunit 7a                                                 | 7705330          | 30         | 3               | 15                    | 3               |
| 983 | guanine nucleotide-binding protein G (I)/G (S)/G (T) subunit beta- 2                | 20357529         | 37         | 2               | 6.20                  | 3               |

Contd...

Supplementary Table 5: Contd...

| No   | Protein                                                                           | Accession number | Mass (kDa) | Peptides number | Sequence coverage (%) | Spectral counts |
|------|-----------------------------------------------------------------------------------|------------------|------------|-----------------|-----------------------|-----------------|
| 984  | actin-related protein 2/3 complex subunit 5                                       | 5031593          | 16         | 2               | 13                    | 3               |
| 985  | 6-phosphofructokinase, muscle type isoform 1                                      | 266453619        | 93         | 2               | 3.50                  | 3               |
| 986  | choline-phosphate cytidylyltransferase A                                          | 31543385         | 42         | 2               | 9.00                  | 3               |
| 987  | 40S ribosomal protein S21                                                         | 4506699          | 9          | 2               | 23                    | 3               |
| 988  | geranylgeranyl pyrophosphate synthase                                             | 83700220         | 35         | 2               | 13                    | 3               |
| 989  | UDP-N-acetylhexosamine pyrophosphorylase                                          | 156627575        | 57         | 2               | 5.70                  | 3               |
| 990  | resistin precursor                                                                | 301129180        | 11         | 2               | 24                    | 3               |
| 991  | dolichyl-diphosphooligosaccharide--protein glycosyltransferase subunit STT3B      | 30578410         | 94         | 2               | 2.50                  | 3               |
| 992  | 60S ribosomal protein L36                                                         | 16117796         | 12         | 3               | 22                    | 3               |
| 993  | 26S proteasome non-ATPase regulatory subunit 10 isoform 1                         | 4506217          | 24         | 2               | 6.60                  | 3               |
| 994  | HIG1 domain family member 1A, mitochondrial isoform b [Homo                       | 153085463        | 10         | 2               | 43                    | 3               |
| 995  | transmembrane protein 14C .                                                       | 259089438        | 12         | 2               | 41                    | 3               |
| 996  | V-type proton ATPase subunit F isoform 1                                          | 20357547         | 13         | 2               | 30                    | 3               |
| 997  | thioredoxin reductase 2, mitochondrial precursor                                  | 22035672         | 57         | 2               | 5.50                  | 2               |
| 998  | talin-1                                                                           | 223029410        | 270        | 2               | 1.40                  | 2               |
| 999  | cell division control protein 42 homolog isoform 1                                | 4757952          | 21         | 2               | 14                    | 2               |
| 1000 | actin-related protein 2/3 complex subunit 2                                       | 23238211         | 34         | 2               | 7.70                  | 2               |
| 1001 | phosphoacetylglucosamine mutase isoform 1                                         | 315707006        | 63         | 2               | 9.50                  | 2               |
| 1002 | dnaJ homolog subfamily A member 4 isoform 2                                       | 194328760        | 45         | 2               | 9.10                  | 2               |
| 1003 | methionyl-tRNA synthetase, cytoplasmic                                            | 14043022         | 101        | 2               | 2.40                  | 2               |
| 1004 | beta-hexosaminidase subunit beta preproprotein                                    | 4504373          | 63         | 2               | 5.20                  | 2               |
| 1005 | nuclear pore glycoprotein p62                                                     | 24497605         | 53         | 2               | 6.70                  | 2               |
| 1006 | protein FAM71A                                                                    | 282721094        | 63         | 2               | 3.70                  | 2               |
| 1007 | V-type proton ATPase subunit B, brain isoform                                     | 19913428         | 57         | 2               | 5.10                  | 2               |
| 1008 | dolichyl-diphosphooligosaccharide--protein glycosyltransferase subunit STT3A      | 22749415         | 81         | 2               | 2.80                  | 2               |
| 1009 | histidine triad nucleotide-binding protein 3                                      | 189217863        | 20         | 2               | 11                    | 2               |
| 1010 | adenylate kinase domain-containing protein 1 isoform 1                            | 237858799        | 221        | 2               | 0.99                  | 2               |
| 1011 | coiled-coil domain-containing protein 151                                         | 117553613        | 69         | 2               | 4.20                  | 2               |
| 1012 | 60S ribosomal protein L4                                                          | 16579885         | 48         | 2               | 4.70                  | 2               |
| 1013 | actin-related protein 3                                                           | 5031573          | 47         | 2               | 7.90                  | 2               |
| 1014 | serine/threonine-protein phosphatase 6 catalytic subunit isoform a                | 183603929        | 39         | 2               | 7.00                  | 2               |
| 1015 | synaptosomal-associated protein 29                                                | 4759154          | 29         | 2               | 8.50                  | 2               |
| 1016 | transcription factor SOX-11                                                       | 4507161          | 47         | 2               | 10.00                 | 2               |
| 1017 | arf-GAP with SH3 domain, ANK repeat and PH domain- containing protein 3 isoform a | 19923540         | 99         | 2               | 1.60                  | 2               |
| 1018 | syntaxin-binding protein 2 isoform a                                              | 188528689        | 66         | 2               | 4.70                  | 2               |
| 1019 | microfibril-associated glycoprotein 4 isoform 2 precursor                         | 23111005         | 29         | 2               | 17                    | 2               |
| 1020 | meiosis-specific nuclear structural protein 1                                     | 8922950          | 61         | 2               | 5.30                  | 2               |
| 1021 | staphylococcal nuclease domain-containing protein 1                               | 77404397         | 102        | 2               | 2.60                  | 2               |
| 1022 | disintegrin and metalloproteinase domain-containing protein 10 precursor          | 4557251          | 84         | 2               | 2.50                  | 2               |
| 1023 | cytoplasmic aconitate hydratase                                                   | 8659555          | 98         | 2               | 4.80                  | 2               |
| 1024 | ATPase ASNA1                                                                      | 50428938         | 39         | 2               | 7.50                  | 2               |
